# Supplementary material for: Cu(i)- and Au(i)-catalyzed regioselective oxidation of diynes: divergent synthesis of N-heterocycles
Source: Royal Society of Chemistry journal article supplement (doi:10.1039/d1qo00912e), 2021-01-01

Supporting Information

**Cu(I)- and Au(I)-Catalyzed Regioselective Oxidations of Diynes: Divergent  
Synthesis of N-Heterocycles**

Wen-Bo Shen,<sup>\*a</sup> Ting-Ting Zhang,<sup>a</sup> Meng Zhang,<sup>a</sup> Jing-Jing Wu,<sup>b</sup> Xiao-Lei Jiang,<sup>a</sup>  
Guang-Xin Ru,<sup>\*a</sup> Guang-Qin Gao,<sup>a</sup> and Xiu-Hong Zhu<sup>a</sup>

<sup>a</sup>College of Sciences and College of Forestry, Henan Agricultural University, Zhengzhou  
450002, China

<sup>b</sup>Department of Library, Qingdao Agricultural University, Qingdao 266109, China

| <b>Content</b>                                                | <b>Page Number</b> |
|---------------------------------------------------------------|--------------------|
| <b>General Information</b>                                    | S2                 |
| <b>More Reaction Condition and Mechanism Studies</b>          | S3                 |
| <b>Preparation of Starting Materials</b>                      | S5                 |
| <b>General Procedure: Copper Catalysis and Gold Catalysis</b> | S7                 |
| <b>Synthetic Applications</b>                                 | S39                |
| <b>X-Ray Crystallographic Data</b>                            | S42                |
| <b>NMR Spectra</b>                                            | S45                |

**General Information.** Ethyl acetate (ACS grade), hexanes (ACS grade) and anhydrous 1,2-dichloroethane (ACS grade) were obtained commercially and used without further purification. Methylene chloride, tetrahydrofuran and diethyl ether were purified according to standard methods unless otherwise noted. Commercially available reagents were used without further purification. Reactions were monitored by thin layer chromatography (TLC) using silicycle pre-coated silica gel plates. Flash column chromatography was performed over silica gel (300-400 mesh). Infrared spectra were recorded on a Nicolet iS 10 spectrometer as thin film and are reported in reciprocal centimeter ( $\text{cm}^{-1}$ ). Mass spectra were recorded with Micromass Q-Exactive Focus mass spectrometer using electron spray ionization.

$^1\text{H}$  NMR spectra were recorded on a Bruker AV-400 spectrometer in chloroform- $\text{d}_3$ . Chemical shifts are reported in ppm with the internal TMS signal at 0.0 ppm as a standard. The data is being reported as (s = singlet, d = doublet, t = triplet, m = multiplet or unresolved, brs = broad singlet, coupling constant(s) in Hz, integration).

$^{13}\text{C}$  NMR spectra were recorded on on a Bruker AV-400 spectrometer in chloroform- $\text{d}_3$ . Chemical shifts are reported in ppm with the internal chloroform signal at 77.0 ppm as a standard.

## More Reaction Condition and Mechanism Studies

1. **3a** and **3aa** could not be converted to each other:

**3aa** could not be converted into **3a** under Cu catalysis: only **3aa** was recovered.

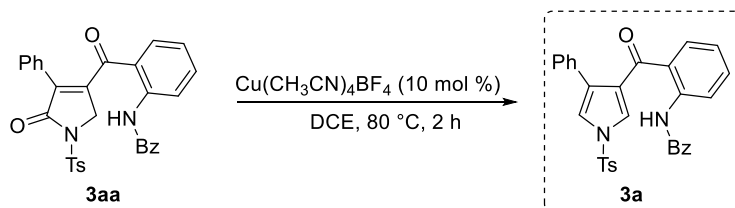

**3a** could not be converted into **3aa** under Au catalysis: only **3a** was recovered.

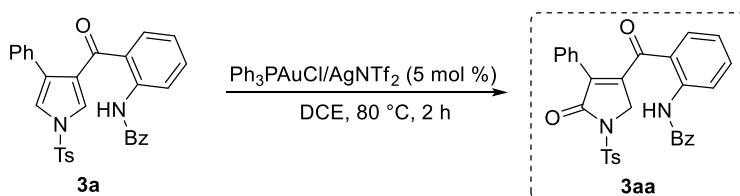

2. Other noble metals such as IPrAuCl/AgNTf<sub>2</sub>, XPhosAuCl/AgNTf<sub>2</sub> and AgNTf<sub>2</sub>, and Brønsted acids did not catalyze this reaction. These reactions only gave a complicated mixture of products.

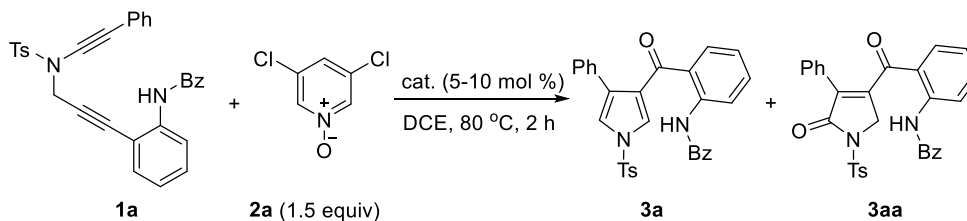

| Entry | Cat. (x mol %)                   | Oxidant   | T (°C) | Yield [%] |            |
|-------|----------------------------------|-----------|--------|-----------|------------|
|       |                                  |           |        | <b>3a</b> | <b>3aa</b> |
| 1     | IPrAuCl/AgNTf <sub>2</sub> (5)   | <b>2a</b> | 80     | 11        | 68         |
| 2     | XPhosAuCl/AgNTf <sub>2</sub> (5) | <b>2a</b> | 80     | 25        | 33         |
| 3     | AgNTf <sub>2</sub> (5)           | <b>2a</b> | 80     | 33        | 18         |
| 4     | MsOH (10)                        | <b>2a</b> | 80     | <1        | <1         |
| 5     | TsOH (10)                        | <b>2a</b> | 80     | <1        | <1         |
| 6     | CF <sub>3</sub> COOH (10)        | <b>2a</b> | 80     | <1        | <1         |
| 7     | TfOH (10)                        | <b>2a</b> | 80     | <1        | <1         |
| 8     | HNTf <sub>2</sub> (10)           | <b>2a</b> | 80     | <1        | <1         |

3. Optimization of reaction conditions for the oxidative cyclization of diyne **4a**, please see as followed:<sup>a</sup>

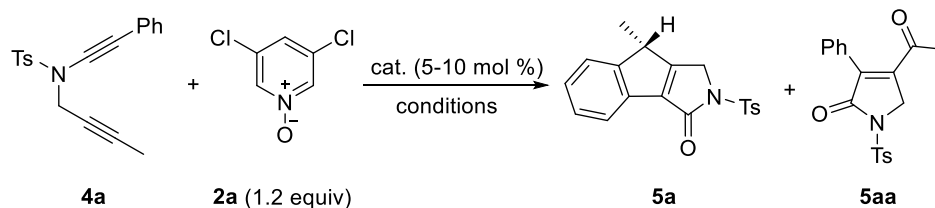

| Entry                 | Cat. (x mol %)                                           | Reaction conditions                   | Yield [%] <sup>b</sup> |            |
|-----------------------|----------------------------------------------------------|---------------------------------------|------------------------|------------|
|                       |                                                          |                                       | <b>5a</b>              | <b>5aa</b> |
| 1                     | Cu(CH <sub>3</sub> CN) <sub>4</sub> BF <sub>4</sub> (10) | DCE, 80 °C, 12 h                      | 7                      | 16         |
| 2                     | Cu(CH <sub>3</sub> CN) <sub>4</sub> PF <sub>6</sub> (10) | DCE, 80 °C, 4.5 h                     | 12                     | 14         |
| 3                     | CuOTf (10)                                               | DCE, 80 °C, 25 h                      | 8                      | 10         |
| 4                     | Cu(OTf) <sub>2</sub> (10)                                | DCE, 80 °C, 6.5 h                     | 10                     | 20         |
| 5                     | Ph <sub>3</sub> PAuCl/AgNTf <sub>2</sub> (5)             | DCE, 80 °C, 2 h                       | 28                     | 5          |
| 6                     | Ph <sub>3</sub> PAuCl/AgNTf <sub>2</sub> (5)             | PhCl, 80 °C, 1.5 h                    | 71                     | 12         |
| 7                     | Ph <sub>3</sub> PAuCl/AgNTf <sub>2</sub> (5)             | PhCF <sub>3</sub> , 80 °C, 1.5 h      | 78                     | 10         |
| 8                     | Ph <sub>3</sub> PAuCl/AgNTf <sub>2</sub> (5)             | TCE, 80 °C, 1.5 h                     | 63                     | 14         |
| 9                     | Ph <sub>3</sub> PAuCl/AgNTf <sub>2</sub> (5)             | PhCF <sub>3</sub> , 60 °C, 1.5 h      | 78                     | 11         |
| 10                    | IPrAuCl/AgNTf <sub>2</sub> (5)                           | PhCF <sub>3</sub> , 60 °C, 1.0 h      | 67                     | 9          |
| 11                    | XPhosAuCl/AgNTf <sub>2</sub> (5)                         | PhCF <sub>3</sub> , 60 °C, 1.0 h      | 51                     | 6          |
| <b>12<sup>c</sup></b> | <b>Ph<sub>3</sub>PAuCl/AgNTf<sub>2</sub> (5)</b>         | <b>PhCF<sub>3</sub>, 60 °C, 1.0 h</b> | <b>80</b>              | <b>5</b>   |

<sup>a</sup> Reaction conditions: **4a** (0.1 mmol), **2a** (0.12 mmol), catalyst (5-10 mol %), 0.05 M, in vials. <sup>b</sup> Measured by <sup>1</sup>H NMR using diethyl phthalate as the internal standard. <sup>c</sup> 10 mol % NaBARF was added.

## Representative synthetic procedures for the preparation of amide-tethered diynes

### 1a-1u:

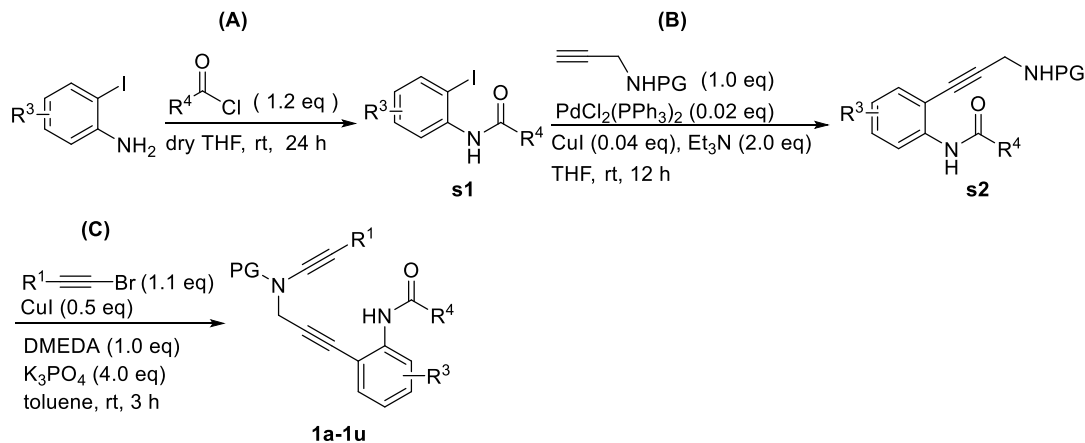

(A): Acyl chloride (12.0 mmol) was slowly added to a solution of 2-iodoaniline (10.0 mmol) in 20.0 mL dry THF at room temperature via dropping funnel. The reaction mixture was stirred at room temperature and the progress of the reaction was monitored by TLC. The reaction typically took 24 h. Upon completion, EtOAc (30 mL) was added, and the mixture was washed with 5% NaHCO<sub>3</sub>, brine, dried over MgSO<sub>4</sub>, and concentrated under reduced pressure to yield the crude iodobenzene **s1**, which was then used in the next step without purification.<sup>1</sup>

(B): Add Pd(PPh<sub>3</sub>)<sub>2</sub>Cl<sub>2</sub> (0.2 mmol, 140.4 mg), CuI (0.4 mmol, 76.0 mg) and triethylamine (20.0 mmol, 2020.0 mg) to a solution of the *N*-sulfonyl propargyl amine (10.0 mmol) and iodobenzene **s1** (10.0 mmol) in THF (30.0 mL) at room temperature. The reaction mixture was stirred at room temperature and the progress of the reaction was monitored by TLC. The reaction typically took 12 h. Upon completion, the reaction crude was filtered through a Celite plug and concentrated under vacuum, and the residue was purified by chromatography on silica gel (eluent: petroleum ether/ethyl acetate) to afford the desired substrates **s2**.<sup>2</sup>

(C): To a mixture of **s2** (3.0 mmol), K<sub>3</sub>PO<sub>4</sub> (12.0 mmol, 2544.0 mg), CuI (1.5 mmol, 285.0 mg), and DMEDA (3.0 mmol, 264.0 mg) in the reaction vial was added a solution of a respective brominated alkyne (3.3 mmol) in toluene. The reaction mixture was

stirred at room temperature and the progress of the reaction was monitored by TLC. The reaction typically took 3 h. Upon completion, the reaction crude was filtered through a Celite plug and concentrated under vacuum, and the residue was purified by chromatography on silica gel (eluent: petroleum ether/ethyl acetate) to afford the desired enynamide substrates **1a-1u**.<sup>2</sup>

**Representative synthetic procedures for the preparation of diynes 4a-4o:**

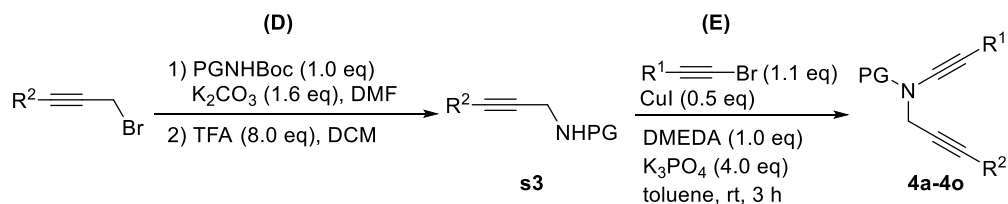

**(D):** Add propargyl bromide (10.0 mmol) to a solution of the PGNHBoc (10.0 mmol) and potassium carbonate (16.0 mmol, 2208.0 mg) in DMF (15.0 mL) at room temperature. The reaction mixture was stirred at room temperature and the progress of the reaction was monitored by TLC. The reaction typically took 3 h. Upon completion, the reaction crude was filtered through a Celite plug and concentrated under vacuum, and the residue was added into a solution of the trifluoroacetic acid (80.0 mmol, 9120.0 mg) in DCM (15.0 mL) at room temperature. The reaction mixture was stirred at room temperature and the progress of the reaction was monitored by TLC. The reaction typically took 12 h. Upon completion, the reaction crude was concentrated under vacuum, and the residue was purified by chromatography on silica gel (eluent: petroleum ether/ethyl acetate) to afford the desired substrates **s3**.<sup>3</sup>

**(E):** To a mixture of **s3** (3.0 mmol),  $\text{K}_3\text{PO}_4$  (12.0 mmol, 2544.0 mg), CuI (1.5 mmol, 285.0 mg), and DMEDA (3.0 mmol, 264.0 mg) in the reaction vial was added a solution of a respective brominated alkyne (3.3 mmol) in toluene. The reaction mixture was stirred at room temperature and the progress of the reaction was monitored by TLC. The reaction typically took 3 h. Upon completion, the reaction crude was filtered through a Celite plug and concentrated under vacuum, and the residue was purified by

chromatography on silica gel (eluent: petroleum ether/ethyl acetate) to afford the desired enynamide substrates **4a-4o**.<sup>2</sup>

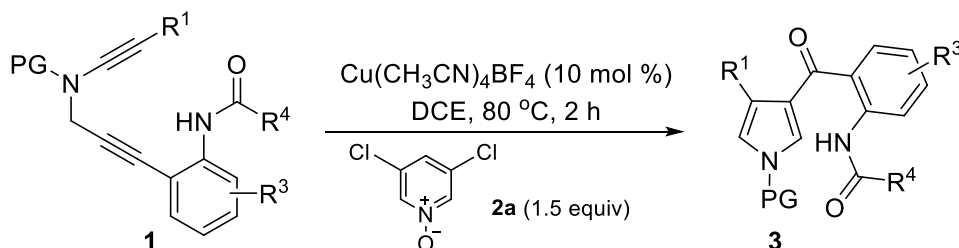

### General procedure for the synthesis of pyrroles **3**:

3,5-Dichloropyridine *N*-oxide **2a** (0.3 mmol, 49.2 mg) and  $\text{Cu}(\text{CH}_3\text{CN})_4\text{BF}_4$  (0.02 mmol, 6.3 mg) were added in this order to the amide-tethered diynes **1** (0.2 mmol) in DCE (4.0 mL) at room temperature. The reaction mixture was stirred at 80 °C (80 °C, heating mantle temperature) and the progress of the reaction was monitored by TLC. The reaction typically took 2 h. Upon completion, the mixture was then concentrated and the residue was purified by chromatography on silica gel (eluent: petroleum ether/ethyl acetate) to afford the desired product **3**.

### *N*-(2-(4-phenyl-1-tosyl-1*H*-pyrrole-3-carbonyl)phenyl)benzamide (**3a**)

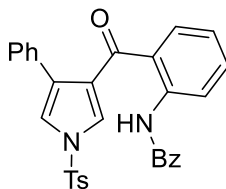

**3a**

The reaction was conducted with *N*-(2-(3-((4-methyl-*N*-(phenylethynyl)phenyl)sulfonamido)prop-1-yn-1-yl)phenyl)benzamide (**1a**, 0.2 mmol, 101.0 mg), 3,5-dichloropyridine *N*-oxide (**2a**, 0.3 mmol, 49.2 mg), and  $\text{Cu}(\text{CH}_3\text{CN})_4\text{BF}_4$  (0.02 mmol, 6.3 mg) in DCE (4.0 mL) at 80 °C (80 °C, heating mantle temperature).

Purification by column chromatography on silica gel (petroleum ether/ethyl acetate = 5:1) yielded **3a** (81.8 mg, 79%) as a pale yellow oil.

The reaction was conducted with *N*-(2-(3-((4-methyl-*N*-(phenylethynyl)phenyl)sulfonamido)prop-1-yn-1-yl)phenyl)benzamide (**1a**, 1.0 mmol, 505.0 mg), 3,5-dichloropyridine *N*-oxide (**2a**, 1.5 mmol, 246.0 mg), and Cu(CH<sub>3</sub>CN)<sub>4</sub>BF<sub>4</sub> (0.1 mmol, 31.5 mg) in DCE (20.0 mL) at 80 °C (80 °C, oil bath temperature). Purification by column chromatography on silica gel (petroleum ether/ethyl acetate = 5:1) yielded **3a** (369.9 mg, 71%) as a pale yellow oil.

<sup>1</sup>H NMR (400 MHz, CDCl<sub>3</sub>) δ 11.85 (s, 1H), 8.81 (d, *J* = 8.4 Hz, 1H), 7.97 (d, *J* = 8.0 Hz, 2H), 7.83 (d, *J* = 8.1 Hz, 2H), 7.78 (d, *J* = 7.9 Hz, 1H), 7.59 (t, *J* = 7.9 Hz, 1H), 7.52 – 7.42 (m, 4H), 7.34 (d, *J* = 8.1 Hz, 2H), 7.30 – 7.24 (m, 6H), 7.05 (t, *J* = 7.6 Hz, 1H), 2.42 (s, 3H); <sup>13</sup>C NMR (100 MHz, CDCl<sub>3</sub>) δ 194.3, 166.0, 146.2, 140.7, 134.8(4), 134.8(0), 134.5, 133.5, 132.2, 132.0, 130.4, 130.0, 128.7, 128.5, 128.1, 127.5, 127.4(1), 127.3(8), 126.6, 126.2, 124.2, 122.4, 121.2, 119.1, 21.7; IR (neat): 3284 (br), 2924, 1727, 1678, 1603, 1581, 1494, 1448, 1377, 1305, 1189, 1174, 1067, 906, 669; HRMS (ESI) *m/z*: [M + H]<sup>+</sup> calcd for C<sub>31</sub>H<sub>25</sub>N<sub>2</sub>O<sub>4</sub>S 521.1530, found 521.1524.

***N*-(2-(5-oxo-4-phenyl-1-tosyl-2,5-dihydro-1*H*-pyrrole-3-carbonyl)phenyl)benzamide (3aa)**

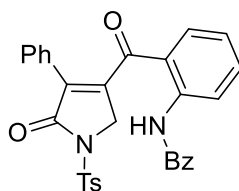

**3aa**

<sup>1</sup>H NMR (400 MHz, CDCl<sub>3</sub>) δ 11.33 (s, 1H), 8.04 (d, *J* = 7.3 Hz, 1H), 7.21 – 7.15 (m, 4H), 6.73 – 6.58 (m, 5H), 6.50 – 6.32 (m, 7H), 5.97 (d, *J* = 6.7 Hz, 1H), 3.93 (s, 2H), 1.57 (s, 3H); <sup>13</sup>C NMR (100 MHz, CDCl<sub>3</sub>) δ 196.3, 166.2, 166.1, 147.6, 145.7, 142.2, 137.1, 136.0, 134.7, 134.3, 133.3, 132.4, 129.9, 129.0, 128.9, 128.6, 128.4, 127.5, 122.7, 120.8, 119.7, 50.7, 21.7; IR (neat): 3284 (br), 2924, 1727, 1683, 1624, 1582, 1494, 1449, 1367,



1241, 1183, 1158, 1090, 965, 665; HRMS (ESI)  $m/z$ :  $[M + H]^+$  calcd for  $C_{31}H_{25}N_2O_5S$  537.1479, found 537.1477.

***N*-(2-(4-phenyl-1-(phenylsulfonyl)-1*H*-pyrrole-3-carbonyl)phenyl)benzamide (3b)**

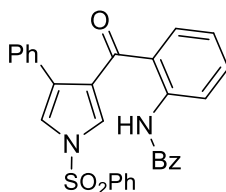

**3b**

The reaction was conducted with *N*-(2-(3-(*N*-(phenylethynyl)phenylsulfonamido)prop-1-yn-1-yl)phenyl)benzamide (**1b**, 0.2 mmol, 98.2 mg), 3,5-dichloropyridine *N*-oxide (**2a**, 0.3 mmol, 49.2 mg), and  $Cu(CH_3CN)_4BF_4$  (0.02 mmol, 6.3 mg) in DCE (4.0 mL) at 80 °C (80 °C, heating mantle temperature). Purification by column chromatography on silica gel (petroleum ether/ethyl acetate = 5:1) yielded **3b** (86.0 mg, 85%) as a pale yellow oil.

$^1H$  NMR (400 MHz,  $CDCl_3$ )  $\delta$  11.87 (s, 1H), 8.82 (d,  $J = 8.4$  Hz, 1H), 8.03 – 7.95 (m, 4H), 7.77 (d,  $J = 7.8$  Hz, 1H), 7.66 – 7.42 (m, 8H), 7.32 – 7.25 (m, 6H), 7.05 (t,  $J = 7.6$  Hz, 1H);  $^{13}C$  NMR (100 MHz,  $CDCl_3$ )  $\delta$  194.3, 166.0, 140.8, 137.9, 134.9, 134.7, 134.4, 133.6, 132.1, 132.0, 130.1, 129.8, 128.7, 128.5, 128.1, 127.5, 127.4, 127.3, 126.8, 126.1, 124.1, 122.4, 121.2, 119.1; IR (neat): 3280 (br), 2924, 1727, 1678, 1629, 1581, 1525, 1448, 1378, 1304, 1174, 1090, 1068, 755, 605; HRMS (ESI)  $m/z$ :  $[M + H]^+$  calcd for  $C_{30}H_{23}N_2O_4S$  507.1373, found 507.1370.

***N*-(2-(1-((4-bromophenyl)sulfonyl)-4-phenyl-1*H*-pyrrole-3-carbonyl)phenyl)benzamide (3c)**

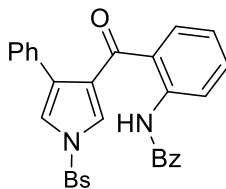

### 3c

The reaction was conducted with *N*-(2-(3-((4-bromo-*N*-(phenylethynyl)phenyl)sulfonamido)prop-1-yn-1-yl)phenyl)benzamide (**1c**, 0.2 mmol, 113.8 mg), 3,5-dichloropyridine *N*-oxide (**2a**, 0.3 mmol, 49.2 mg), and Cu(CH<sub>3</sub>CN)<sub>4</sub>BF<sub>4</sub> (0.02 mmol, 6.3 mg) in DCE (4.0 mL) at 80 °C (80 °C, heating mantle temperature). Purification by column chromatography on silica gel (petroleum ether/ethyl acetate = 5:1) yielded **3c** (68.4 mg, 58%) as a pale yellow oil.

<sup>1</sup>H NMR (400 MHz, CDCl<sub>3</sub>) δ 11.85 (s, 1H), 8.81 (d, *J* = 8.4 Hz, 1H), 7.98 (d, *J* = 7.6 Hz, 2H), 7.81 (d, *J* = 7.0 Hz, 2H), 7.75 (d, *J* = 7.9 Hz, 1H), 7.70 (d, *J* = 7.1 Hz, 2H), 7.59 (t, *J* = 7.9 Hz, 1H), 7.53 – 7.43 (m, 4H), 7.29 – 7.26 (m, 6H), 7.05 (t, *J* = 7.6 Hz, 1H); <sup>13</sup>C NMR (100 MHz, CDCl<sub>3</sub>) δ 194.2, 166.0, 140.8, 136.8, 134.9, 134.4, 133.5, 133.2, 132.0, 131.9, 130.5, 130.3, 128.8, 128.7, 128.5, 128.1, 127.7, 127.4, 127.2, 125.9, 124.1, 122.5, 121.3, 118.9; IR (neat): 3311 (br), 2925, 1728, 1679, 1603, 1580, 1448, 1392, 1305, 1265, 1185, 1067, 1009, 906, 745; HRMS (ESI) *m/z*: [M + H]<sup>+</sup> calcd for C<sub>30</sub>H<sub>22</sub>BrN<sub>2</sub>O<sub>4</sub>S 585.0478, found 585.0474.

### *N*-(2-(1-(methylsulfonyl)-4-phenyl-1*H*-pyrrole-3-carbonyl)phenyl)benzamide (**3d**)

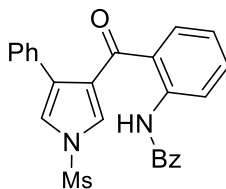

### 3d

The reaction was conducted with *N*-(2-(3-(*N*-(phenylethynyl)methylsulfonamido)prop-1-yn-1-yl)phenyl)benzamide (**1d**, 0.2 mmol, 85.7 mg), 3,5-dichloropyridine *N*-oxide (**2a**, 0.3 mmol, 49.2 mg), and Cu(CH<sub>3</sub>CN)<sub>4</sub>BF<sub>4</sub> (0.02 mmol, 6.3 mg) in DCE (4.0 mL) at 80 °C (80 °C, heating mantle temperature). Purification by column chromatography on silica gel (petroleum ether/ethyl acetate = 5:1) yielded **3d** (64.9 mg, 73%) as a yellow solid (mp 236-238 °C).

<sup>1</sup>H NMR (400 MHz, CDCl<sub>3</sub>) δ 11.93 (s, 1H), 8.84 (d, *J* = 8.4 Hz, 1H), 8.01 (d, *J* = 7.3 Hz, 2H), 7.79 (d, *J* = 7.8 Hz, 1H), 7.60 – 7.45 (m, 5H), 7.32 – 7.25 (m, 6H), 7.03 (t, *J* = 7.6

Hz, 1H), 3.28 (s, 3H);  $^{13}\text{C}$  NMR (100 MHz,  $\text{CDCl}_3$ )  $\delta$  194.5, 165.9, 140.9, 135.0, 134.5, 133.6, 132.0(2), 131.9(9), 130.2, 128.8, 128.6, 128.1, 127.7, 127.4, 127.0, 125.6, 123.9, 122.4, 121.2, 118.8, 43.3; IR (neat): 3265 (br), 2926, 1670, 1602, 1581, 1529, 1508, 1447, 1361, 1226, 1173, 1156, 1071, 904, 699; HRMS (ESI)  $m/z$ :  $[\text{M} + \text{H}]^+$  calcd for  $\text{C}_{25}\text{H}_{21}\text{N}_2\text{O}_4\text{S}$  445.1217, found 445.1208.

***N*-(2-(4-(4-fluorophenyl)-1-tosyl-1*H*-pyrrole-3-carbonyl)phenyl)benzamide (3e)**

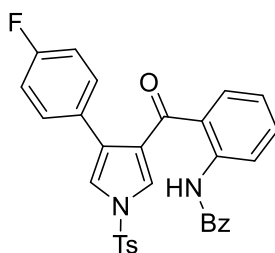

**3e**

The reaction was conducted with *N*-(2-(3-(*N*-(4-fluorophenyl)ethynyl)methylsulfonamido)prop-1-yn-1-yl)phenyl)benzamide (**1e**, 0.2 mmol, 104.6 mg), 3,5-dichloropyridine *N*-oxide (**2a**, 0.3 mmol, 49.2 mg), and  $\text{Cu}(\text{CH}_3\text{CN})_4\text{BF}_4$  (0.02 mmol, 6.3 mg) in DCE (4.0 mL) at 80 °C (80 °C, heating mantle temperature). Purification by column chromatography on silica gel (petroleum ether/ethyl acetate = 5:1) yielded **3e** (99.9 mg, 92%) as a pale yellow oil.

$^1\text{H}$  NMR (400 MHz,  $\text{CDCl}_3$ )  $\delta$  11.78 (s, 1H), 8.80 (d,  $J = 8.5$  Hz, 1H), 7.97 (d,  $J = 7.9$  Hz, 2H), 7.83 (d,  $J = 8.2$  Hz, 2H), 7.77 (d,  $J = 7.9$  Hz, 1H), 7.61 (t,  $J = 7.9$  Hz, 1H), 7.53 – 7.43 (m, 4H), 7.35 (d,  $J = 7.9$  Hz, 2H), 7.26 – 7.23 (m, 3H), 7.08 (t,  $J = 7.6$  Hz, 1H), 7.01 – 6.96 (m, 2H), 2.43 (s, 3H);  $^{13}\text{C}$  NMR (100 MHz,  $\text{CDCl}_3$ )  $\delta$  194.1, 166.0, 162.2 (d,  $J = 245.0$  Hz), 146.2, 140.7, 134.9, 134.8, 134.4, 133.4, 132.0, 130.4, 129.8 (d,  $J = 8.0$  Hz), 129.0, 128.7, 128.3 (d,  $J = 3.0$  Hz), 127.4, 126.4, 124.3, 122.5, 121.4, 119.1, 115.5 (d,  $J = 22.0$  Hz), 21.7; IR (neat): 3285 (br), 2924, 1727, 1681, 1602, 1581, 1511, 1448, 1377, 1295, 1175, 1069, 1007, 967, 668; HRMS (ESI)  $m/z$ :  $[\text{M} + \text{H}]^+$  calcd for  $\text{C}_{31}\text{H}_{24}\text{FN}_2\text{O}_4\text{S}$  539.1435, found 539.1425.

***N*-(2-(4-(4-chlorophenyl)-1-tosyl-1*H*-pyrrole-3-carbonyl)phenyl)benzamide (3f)**

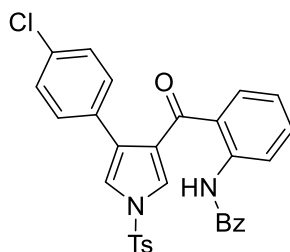

**3f**

The reaction was conducted with *N*-(2-(3-((*N*-((4-chlorophenyl)ethynyl)-4-methylphenyl)sulfonamido)prop-1-yn-1-yl)phenyl)benzamide (**1f**, 0.2 mmol, 107.8 mg), 3,5-dichloropyridine *N*-oxide (**2a**, 0.3 mmol, 49.2 mg), and  $\text{Cu}(\text{CH}_3\text{CN})_4\text{BF}_4$  (0.02 mmol, 6.3 mg) in DCE (4.0 mL) at 80 °C (80 °C, heating mantle temperature). Purification by column chromatography on silica gel (petroleum ether/ethyl acetate = 5:1) yielded **3f** (87.1 mg, 79%) as a pale yellow oil.

$^1\text{H}$  NMR (400 MHz,  $\text{CDCl}_3$ )  $\delta$  11.76 (s, 1H), 8.81 (d,  $J = 8.5$  Hz, 1H), 7.96 (d,  $J = 7.2$  Hz, 2H), 7.84 – 7.78 (m, 3H), 7.63 (t,  $J = 8.0$  Hz, 1H), 7.52 – 7.44 (m, 4H), 7.35 (d,  $J = 7.7$  Hz, 2H), 7.28 – 7.21 (m, 2H), 7.10 (t,  $J = 7.3$  Hz, 1H), 2.43 (s, 3H);  $^{13}\text{C}$  NMR (100 MHz,  $\text{CDCl}_3$ )  $\delta$  194.0, 166.0, 146.3, 140.7, 134.9, 134.7, 134.5, 133.5, 133.4, 132.0, 130.8, 130.5, 129.4, 128.9, 128.8, 128.7, 127.4, 126.6, 126.4, 124.3, 122.6, 121.5, 119.3, 21.7; IR (neat): 3317 (br), 2921, 1679, 1628, 1603, 1581, 1508, 1448, 1382, 1295, 1262, 1174, 1069, 906, 669; HRMS (ESI)  $m/z$ :  $[\text{M} + \text{H}]^+$  calcd for  $\text{C}_{31}\text{H}_{24}\text{ClN}_2\text{O}_4\text{S}$  555.1140, found 555.1131.

***N*-(2-(4-(4-bromophenyl)-1-tosyl-1*H*-pyrrole-3-carbonyl)phenyl)benzamide (3g)**

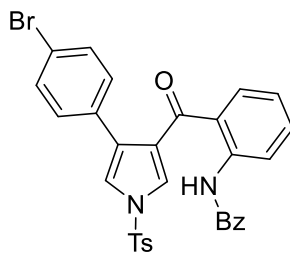

**3g**

The reaction was conducted with *N*-(2-(3-((*N*-((4-bromophenyl)ethynyl)-4-methylphenyl)sulfonamido)prop-1-yn-1-yl)phenyl)benzamide (**1g**, 0.2 mmol, 116.8 mg), 3,5-dichloropyridine *N*-oxide (**2a**, 0.3 mmol, 49.2 mg), and Cu(CH<sub>3</sub>CN)<sub>4</sub>BF<sub>4</sub> (0.02 mmol, 6.3 mg) in DCE (4.0 mL) at 80 °C (80 °C, heating mantle temperature). Purification by column chromatography on silica gel (petroleum ether/ethyl acetate = 5:1) yielded **3g** (102.1 mg, 85%) as a pale yellow oil.

<sup>1</sup>H NMR (400 MHz, CDCl<sub>3</sub>) δ 11.76 (s, 1H), 8.81 (d, *J* = 8.5 Hz, 1H), 7.96 (d, *J* = 7.3 Hz, 2H), 7.84 – 7.78 (m, 3H), 7.63 (t, *J* = 7.6 Hz, 1H), 7.53 – 7.42 (m, 6H), 7.35 (d, *J* = 7.9 Hz, 2H), 7.30 – 7.26 (m, 1H), 7.16 (d, *J* = 7.4 Hz, 2H), 7.10 (t, *J* = 7.6 Hz, 1H), 2.43 (s, 3H); <sup>13</sup>C NMR (100 MHz, CDCl<sub>3</sub>) δ 193.9, 166.0, 146.3, 140.7, 134.9, 134.7, 134.4, 133.4, 132.0, 131.6, 131.2, 130.5, 129.8, 128.9, 128.8, 127.4(2), 127.4(0), 126.6, 126.3, 124.3, 122.6, 121.6, 121.5, 119.3, 21.7; IR (neat): 3287 (br), 2923, 1671, 1623, 1603, 1580, 1509, 1494, 1378, 1297, 1253, 1173, 1069, 904, 664; HRMS (ESI) *m/z*: [M + H]<sup>+</sup> calcd for C<sub>31</sub>H<sub>24</sub>BrN<sub>2</sub>O<sub>4</sub>S 599.0635, found 599.0628.

***N*-(2-(1-tosyl-4-(4-(trifluoromethyl)phenyl)-1*H*-pyrrole-3-carbonyl)phenyl)benzamide (3h)**

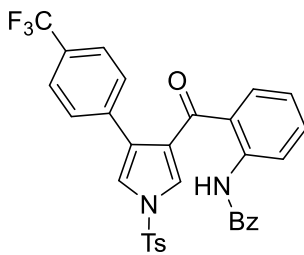

**3h**

The reaction was conducted with *N*-(2-(3-((4-methyl-*N*-((4-(trifluoromethyl)phenyl)ethynyl)phenyl)sulfonamido)prop-1-yn-1-yl)phenyl)benzamide (**1h**, 0.2 mmol, 114.6 mg), 3,5-dichloropyridine *N*-oxide (**2a**, 0.3 mmol, 49.2 mg), and Cu(CH<sub>3</sub>CN)<sub>4</sub>BF<sub>4</sub> (0.02 mmol, 6.3 mg) in DCE (4.0 mL) at 80 °C (80 °C, heating mantle temperature). Purification by column chromatography on silica gel (petroleum ether/ethyl acetate = 5:1) yielded **3h** (88.4 mg, 75%) as a pale yellow oil.

$^1\text{H}$  NMR (400 MHz,  $\text{CDCl}_3$ )  $\delta$  11.73 (s, 1H), 8.81 (d,  $J = 8.3$  Hz, 1H), 7.96 (d,  $J = 7.0$  Hz, 2H), 7.85 – 7.80 (m, 3H), 7.63 (t,  $J = 7.7$  Hz, 1H), 7.57 – 7.35 (m, 11H), 7.11 (t,  $J = 7.5$  Hz, 1H), 2.43 (s, 3H);  $^{13}\text{C}$  NMR (100 MHz,  $\text{CDCl}_3$ )  $\delta$  193.8, 166.0, 146.4, 140.7, 135.0, 134.6, 134.4, 133.3, 132.0, 130.5, 128.8, 128.7, 128.4, 127.5, 127.4, 126.8, 126.3, 125.42 (q,  $J = 3.7$  Hz), 124.3, 122.6, 121.5, 119.9, 21.7; IR (neat): 3288 (br), 2926, 1728, 1682, 1627, 1581, 1521, 1494, 1376, 1325, 1265, 1173, 1068, 906, 672; HRMS (ESI)  $m/z$ :  $[\text{M} + \text{H}]^+$  calcd for  $\text{C}_{32}\text{H}_{24}\text{F}_3\text{N}_2\text{O}_4\text{S}$  589.1403, found 589.1395.

***N*-(2-(4-(*p*-tolyl)-1-tosyl-1*H*-pyrrole-3-carbonyl)phenyl)benzamide (3i)**

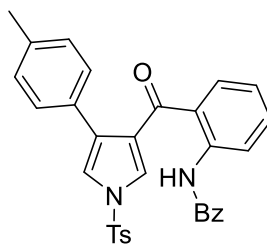

**3i**

The reaction was conducted with *N*-(2-(3-((4-methyl-*N*-(*p*-tolylethynyl)phenyl)sulfonamido)prop-1-yn-1-yl)phenyl)benzamide (**1i**, 0.2 mmol, 103.8 mg), 3,5-dichloropyridine *N*-oxide (**2a**, 0.3 mmol, 49.2 mg), and  $\text{Cu}(\text{CH}_3\text{CN})_4\text{BF}_4$  (0.02 mmol, 6.3 mg) in DCE (4.0 mL) at 80 °C (80 °C, heating mantle temperature). Purification by column chromatography on silica gel (petroleum ether/ethyl acetate = 5:1) yielded **3i** (77.4 mg, 72%) as a pale yellow oil.

$^1\text{H}$  NMR (400 MHz,  $\text{CDCl}_3$ )  $\delta$  11.83 (s, 1H), 8.81 (d,  $J = 8.4$  Hz, 1H), 7.97 (d,  $J = 7.4$  Hz, 2H), 7.83 – 7.78 (m, 3H), 7.60 (t,  $J = 7.9$  Hz, 1H), 7.51 – 7.43 (m, 4H), 7.34 (d,  $J = 7.2$  Hz, 2H), 7.27 – 7.26 (m, 1H), 7.18 – 7.16 (m, 2H), 7.10 – 7.06 (m, 3H), 2.42 (s, 3H), 2.32 (s, 3H);  $^{13}\text{C}$  NMR (100 MHz,  $\text{CDCl}_3$ )  $\delta$  194.4, 166.0, 146.1, 140.7, 137.3, 134.9, 134.7, 134.5, 133.6, 131.9, 130.4, 130.0, 129.2, 128.7, 127.9, 127.4(4), 127.3(6), 126.6, 126.2, 124.4, 122.5, 121.3, 118.8, 21.7, 21.2; IR (neat): 3279 (br), 2922, 1732, 1679, 1629, 1581, 1517, 1448, 1378, 1305, 1264, 1189, 1069, 967, 618; HRMS (ESI)  $m/z$ :  $[\text{M} + \text{H}]^+$  calcd for  $\text{C}_{32}\text{H}_{27}\text{N}_2\text{O}_4\text{S}$  535.1686, found 535.1677.

***N*-2-(4-(4-methoxyphenyl)-1-tosyl-1*H*-pyrrole-3-carbonyl)phenyl)benzamide (**3j**)**

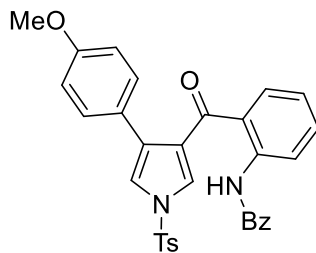

**3j**

The reaction was conducted with *N*-2-(3-((*N*-((4-methoxyphenyl)ethynyl)-4-methylphenyl)sulfonamido)prop-1-yn-1-yl)phenyl)benzamide (**1j**, 0.2 mmol, 107.0 mg), 3,5-dichloropyridine *N*-oxide (**2a**, 0.3 mmol, 49.2 mg), and Cu(CH<sub>3</sub>CN)<sub>4</sub>BF<sub>4</sub> (0.02 mmol, 6.3 mg) in DCE (4.0 mL) at 80 °C (80 °C, heating mantle temperature). Purification by column chromatography on silica gel (petroleum ether/ethyl acetate = 5:1) yielded **3j** (75.3 mg, 68%) as a pale yellow oil.

<sup>1</sup>H NMR (400 MHz, CDCl<sub>3</sub>) δ 11.85 (s, 1H), 8.81 (d, *J* = 8.4 Hz, 1H), 7.98 (d, *J* = 7.9 Hz, 2H), 7.83 – 7.77 (m, 3H), 7.60 (t, *J* = 7.8 Hz, 1H), 7.51 – 7.45 (m, 4H), 7.34 (d, *J* = 7.3 Hz, 2H), 7.27 – 7.20 (m, 3H), 7.07 (t, *J* = 7.0 Hz, 1H), 6.83 (d, *J* = 6.8 Hz, 2H), 3.78 (s, 3H), 2.42 (s, 3H); <sup>13</sup>C NMR (100 MHz, CDCl<sub>3</sub>) δ 194.5, 166.0, 159.1, 146.1, 140.7, 134.9, 134.8, 134.5, 133.6, 132.0, 130.4, 129.7, 129.3, 128.7, 127.4(3), 127.3(6), 126.6, 126.2, 124.6, 124.3, 122.5, 121.2, 118.5, 113.9, 55.2, 21.7; IR (neat): 3280 (br), 2925, 1727, 1679, 1628, 1580, 1514, 1493, 1377, 1295, 1249, 1174, 1037, 906, 670; HRMS (ESI) *m/z*: [M + H]<sup>+</sup> calcd for C<sub>32</sub>H<sub>27</sub>N<sub>2</sub>O<sub>5</sub>S 551.1635, found 551.1625.

***N*-2-(4-(thiophen-3-yl)-1-tosyl-1*H*-pyrrole-3-carbonyl)phenyl)benzamide (**3k**)**

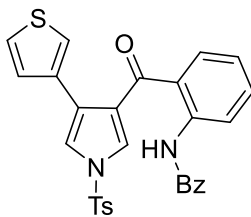

**3k**

The reaction was conducted with *N*-(2-(3-((4-methyl-*N*-(thiophen-3-ylethynyl)phenyl)sulfonamido)prop-1-yn-1-yl)phenyl)benzamide (**1k**, 0.2 mmol, 102.2 mg), 3,5-dichloropyridine *N*-oxide (**2a**, 0.3 mmol, 49.2 mg), and Cu(CH<sub>3</sub>CN)<sub>4</sub>BF<sub>4</sub> (0.02 mmol, 6.3 mg) in DCE (4.0 mL) at 80 °C (80 °C, heating mantle temperature). Purification by column chromatography on silica gel (petroleum ether/ethyl acetate = 5:1) yielded **3k** (90.2 mg, 86%) as a pale yellow oil.

<sup>1</sup>H NMR (400 MHz, CDCl<sub>3</sub>) δ 11.86 (s, 1H), 8.82 (d, *J* = 8.4 Hz, 1H), 8.01 (d, *J* = 7.3 Hz, 2H), 7.81 (d, *J* = 8.2 Hz, 2H), 7.74 (d, *J* = 7.8 Hz, 1H), 7.61 (t, *J* = 7.9 Hz, 1H), 7.55 – 7.43 (m, 4H), 7.38 – 7.32 (m, 4H), 7.26 (t, *J* = 3.9 Hz, 1H), 7.10 – 7.07 (m, 2H), 2.41 (s, 3H); <sup>13</sup>C NMR (100 MHz, CDCl<sub>3</sub>) δ 194.4, 165.9, 146.2, 140.7, 134.8(2), 134.7(5), 134.5, 133.6, 132.3, 132.0, 130.4, 128.8, 127.7, 127.4, 127.3, 126.5, 126.4, 125.6, 124.5, 124.4, 122.7, 122.5, 121.3, 119.0, 21.7; IR (neat): 3284 (br), 2922, 1727, 1680, 1628, 1581, 1524, 1494, 1448, 1327, 1207, 1135, 1070, 969, 666; HRMS (ESI) *m/z*: [M + H]<sup>+</sup> calcd for C<sub>29</sub>H<sub>23</sub>N<sub>2</sub>O<sub>4</sub>S<sub>2</sub> 527.1094, found 527.1083.

### *N*-(2-(4-styryl-1-tosyl-1*H*-pyrrole-3-carbonyl)phenyl)benzamide (**3l**)

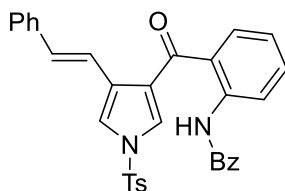

**3l**

The reaction was conducted with *N*-(2-(3-((4-methyl-*N*-(4-phenylbut-3-en-1-yn-1-yl)phenyl)sulfonamido)prop-1-yn-1-yl)phenyl)benzamide (**1l**, 0.2 mmol, 106.2 mg), 3,5-dichloropyridine *N*-oxide (**2a**, 0.3 mmol, 49.2 mg), and Cu(CH<sub>3</sub>CN)<sub>4</sub>BF<sub>4</sub> (0.02 mmol, 6.3 mg) in DCE (4.0 mL) at 80 °C (80 °C, heating mantle temperature). Purification by column chromatography on silica gel (petroleum ether/ethyl acetate = 5:1) yielded **3l** (67.2 mg, 61%) as a pale yellow oil.

<sup>1</sup>H NMR (400 MHz, CDCl<sub>3</sub>) δ 11.66 (s, 1H), 8.80 (d, *J* = 8.4 Hz, 1H), 8.01 (d, *J* = 7.7 Hz, 2H), 7.85 – 7.79 (m, 3H), 7.66 (t, *J* = 7.9 Hz, 1H), 7.53 – 7.41 (m, 7H), 7.36 – 7.26 (m, 6H), 7.19 (t, *J* = 7.6 Hz, 1H), 6.95 (d, *J* = 16.5 Hz, 1H), 2.41 (s, 3H); <sup>13</sup>C NMR (100



MHz, CDCl<sub>3</sub>)  $\delta$  193.9, 165.9, 146.2, 140.2, 137.0, 134.7, 134.5, 134.4, 132.8, 132.0, 130.6, 130.4, 128.8, 128.6, 127.8, 127.5, 127.3(9), 127.3(5), 127.2, 126.5, 126.3, 125.1, 122.7, 121.7, 119.0, 117.5, 21.7; IR (neat): 3318 (br), 2956, 1725, 1679, 1624, 1579, 1521, 1494, 1448, 1378, 1297, 1119, 1068, 967, 672; HRMS (ESI)  $m/z$ : [M + H]<sup>+</sup> calcd for C<sub>33</sub>H<sub>27</sub>N<sub>2</sub>O<sub>4</sub>S 547.1686, found 547.1678.

***N*-(4-chloro-2-(4-phenyl-1-tosyl-1*H*-pyrrole-3-carbonyl)phenyl)benzamide (3m)**

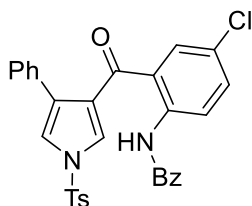

**3m**

The reaction was conducted with *N*-(4-chloro-2-(3-((4-methyl-*N*-(phenylethynyl)phenyl)sulfonamido)prop-1-yn-1-yl)phenyl)benzamide (**1m**, 0.2 mmol, 107.8 mg), 3,5-dichloropyridine *N*-oxide (**2a**, 0.3 mmol, 49.2 mg), and Cu(CH<sub>3</sub>CN)<sub>4</sub>BF<sub>4</sub> (0.02 mmol, 6.3 mg) in DCE (4.0 mL) at 80 °C (80 °C, heating mantle temperature). Purification by column chromatography on silica gel (petroleum ether/ethyl acetate = 5:1) yielded **3m** (61.8 mg, 56%) as a pale yellow oil.

<sup>1</sup>H NMR (400 MHz, CDCl<sub>3</sub>)  $\delta$  11.71 (s, 1H), 8.78 (d, *J* = 9.0 Hz, 1H), 7.96 (d, *J* = 7.7 Hz, 2H), 7.86 (d, *J* = 7.2 Hz, 2H), 7.65 – 7.59 (m, 1H), 7.55 – 7.44 (m, 5H), 7.37 (d, *J* = 7.7 Hz, 2H), 7.30 – 7.22 (m, 6H), 2.44 (s, 3H); <sup>13</sup>C NMR (100 MHz, CDCl<sub>3</sub>)  $\delta$  193.1, 165.8, 146.3, 139.2, 134.8, 134.3, 134.2, 132.8, 132.2, 132.0, 130.5, 130.0, 128.8, 128.5, 128.2, 127.6, 127.4, 126.4, 126.2, 125.2, 122.6, 119.3, 21.7; IR (neat): 3287 (br), 2923, 1729, 1683, 1632, 1577, 1510, 1492, 1375, 1287, 1173, 1112, 1067, 967, 669; HRMS (ESI)  $m/z$ : [M + H]<sup>+</sup> calcd for C<sub>31</sub>H<sub>24</sub>ClN<sub>2</sub>O<sub>4</sub>S 555.1140, found 555.1141.

***N*-(4-bromo-2-(4-phenyl-1-tosyl-1*H*-pyrrole-3-carbonyl)phenyl)benzamide (3n)**

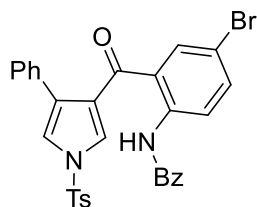

**3n**

The reaction was conducted with *N*-(4-bromo-2-(3-((4-methyl-*N*-(phenylethynyl)phenyl)sulfonamido)prop-1-yn-1-yl)phenyl)benzamide (**1n**, 0.2 mmol, 116.8 mg), 3,5-dichloropyridine *N*-oxide (**2a**, 0.3 mmol, 49.2 mg), and Cu(CH<sub>3</sub>CN)<sub>4</sub>BF<sub>4</sub> (0.02 mmol, 6.3 mg) in DCE (4.0 mL) at 80 °C (80 °C, heating mantle temperature). Purification by column chromatography on silica gel (petroleum ether/ethyl acetate = 5:1) yielded **3n** (72.3 mg, 60%) as a pale yellow oil.

<sup>1</sup>H NMR (400 MHz, CDCl<sub>3</sub>) δ 11.73 (s, 1H), 8.73 (d, *J* = 9.0 Hz, 1H), 7.96 (d, *J* = 7.2 Hz, 2H), 7.86 (d, *J* = 7.1 Hz, 2H), 7.79 – 7.73 (m, 1H), 7.62 (d, *J* = 8.9 Hz, 1H), 7.56 – 7.44 (m, 4H), 7.37 (d, *J* = 7.5 Hz, 2H), 7.30 – 7.22 (m, 6H), 2.44 (s, 3H); <sup>13</sup>C NMR (100 MHz, CDCl<sub>3</sub>) δ 193.0, 165.8, 146.3, 139.6, 137.2, 135.7, 134.8, 134.1, 132.2, 132.0, 130.5, 130.0, 128.8, 128.5, 128.2, 127.6, 127.4, 126.4, 126.1, 125.4, 122.8, 119.3, 114.7, 21.7; IR (neat): 3286 (br), 2922, 1729, 1682, 1630, 1597, 1510, 1492, 1393, 1375, 1295, 1173, 1089, 966, 669; HRMS (ESI) *m/z*: [M + H]<sup>+</sup> calcd for C<sub>31</sub>H<sub>24</sub>BrN<sub>2</sub>O<sub>4</sub>S 599.0635, found 599.0636.

***N*-(4-methyl-2-(4-phenyl-1-tosyl-1*H*-pyrrole-3-carbonyl)phenyl)benzamide (3o)**

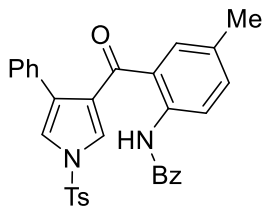

**3o**

The reaction was conducted with *N*-(4-methyl-2-(3-((4-methyl-*N*-(phenylethynyl)phenyl)sulfonamido)prop-1-yn-1-yl)phenyl)benzamide (**1o**, 0.2 mmol, 103.8 mg), 3,5-dichloropyridine *N*-oxide (**2a**, 0.3 mmol, 49.2 mg), and Cu(CH<sub>3</sub>CN)<sub>4</sub>BF<sub>4</sub> (0.02 mmol, 6.3 mg) in DCE (4.0 mL) at 80 °C (80 °C, heating mantle temperature).

Purification by column chromatography on silica gel (petroleum ether/ethyl acetate = 5:1) yielded **3o** (66.3 mg, 62%) as a pale yellow oil.

<sup>1</sup>H NMR (400 MHz, CDCl<sub>3</sub>) δ 11.75 (s, 1H), 8.68 (d, *J* = 8.6 Hz, 1H), 7.98 (d, *J* = 8.0 Hz, 2H), 7.84 (d, *J* = 7.0 Hz, 2H), 7.51 – 7.43 (m, 5H), 7.39 – 7.34 (m, 3H), 7.30 – 7.26 (m, 6H), 2.44 (s, 3H), 2.24 (s, 3H); <sup>13</sup>C NMR (100 MHz, CDCl<sub>3</sub>) δ 194.4, 165.8, 146.2, 138.3, 135.5, 135.0, 134.6, 133.9, 132.3, 132.0, 131.9, 130.4, 130.0, 128.7, 128.5, 128.1, 127.5, 127.4, 126.8, 126.1, 124.1, 121.2, 119.0, 21.7, 20.7; IR (neat): 3290 (br), 2923, 1727, 1679, 1628, 1590, 1519, 1450, 1371, 1304, 1263, 1188, 1090, 968, 669; HRMS (ESI) *m/z*: [M + H]<sup>+</sup> calcd for C<sub>32</sub>H<sub>27</sub>N<sub>2</sub>O<sub>4</sub>S 535.1686, found 535.1688.

#### 4-fluoro-*N*-(2-(4-phenyl-1-tosyl-1*H*-pyrrole-3-carbonyl)phenyl)benzamide (**3p**)

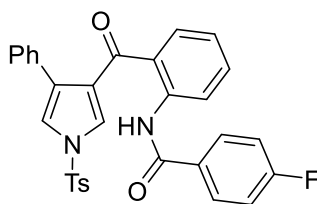

**3p**

The reaction was conducted with 4-fluoro-*N*-(2-(3-((4-methyl-*N*-(phenylethynyl)phenyl)sulfonamido)prop-1-yn-1-yl)phenyl)benzamide (**1p**, 0.2 mmol, 104.6 mg), 3,5-dichloropyridine *N*-oxide (**2a**, 0.3 mmol, 49.2 mg), and Cu(CH<sub>3</sub>CN)<sub>4</sub>BF<sub>4</sub> (0.02 mmol, 6.3 mg) in DCE (4.0 mL) at 80 °C (80 °C, heating mantle temperature). Purification by column chromatography on silica gel (petroleum ether/ethyl acetate = 5:1) yielded **3p** (85.6 mg, 79%) as a pale yellow oil.

<sup>1</sup>H NMR (400 MHz, CDCl<sub>3</sub>) δ 11.87 (s, 1H), 8.78 (d, *J* = 8.3 Hz, 1H), 8.01 – 7.98 (m, 2H), 7.84 (d, *J* = 6.8 Hz, 2H), 7.79 (d, *J* = 7.9 Hz, 1H), 7.60 (t, *J* = 7.9 Hz, 1H), 7.50 – 7.46 (m, 1H), 7.35 (d, *J* = 7.4 Hz, 2H), 7.30 – 7.26 (m, 6H), 7.14 – 7.05 (m, 3H), 2.43 (s, 3H); <sup>13</sup>C NMR (100 MHz, CDCl<sub>3</sub>) δ 194.5, 164.3 (d, *J* = 104.0 Hz), 146.2, 140.7, 134.9, 133.6, 132.2, 130.4, 130.0, 129.9 (d, *J* = 9.0 Hz), 128.5, 128.1, 127.5, 127.4, 126.5, 126.2, 124.1, 122.5, 121.2, 119.2, 115.8 (d, *J* = 22.0 Hz), 21.7; IR (neat): 3324 (br), 2922, 1731, 1680, 1628, 1530, 1504, 1445, 1377, 1293, 1174, 1160, 1067, 967, 669; HRMS (ESI) *m/z*: [M + H]<sup>+</sup> calcd for C<sub>31</sub>H<sub>24</sub>FN<sub>2</sub>O<sub>4</sub>S 539.1435, found 539.1436.

#### 4-chloro-*N*-(2-(4-phenyl-1-tosyl-1*H*-pyrrole-3-carbonyl)phenyl)benzamide (**3q**)

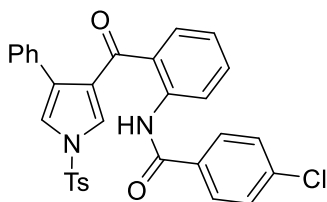

**3q**

The reaction was conducted with 4-chloro-*N*-(2-(3-((4-methyl-*N*-(phenylethynyl)phenyl)sulfonamido)prop-1-yn-1-yl)phenyl)benzamide (**1q**, 0.2 mmol, 107.8 mg), 3,5-dichloropyridine *N*-oxide (**2a**, 0.3 mmol, 49.2 mg), and Cu(CH<sub>3</sub>CN)<sub>4</sub>BF<sub>4</sub> (0.02 mmol, 6.3 mg) in DCE (4.0 mL) at 80 °C (80 °C, heating mantle temperature). Purification by column chromatography on silica gel (petroleum ether/ethyl acetate = 5:1) yielded **3q** (77.8 mg, 70%) as a pale yellow oil.

<sup>1</sup>H NMR (400 MHz, CDCl<sub>3</sub>) δ 11.90 (s, 1H), 8.78 (d, *J* = 8.3 Hz, 1H), 7.91 (d, *J* = 6.1 Hz, 2H), 7.85 – 7.79 (m, 3H), 7.60 (t, *J* = 7.3 Hz, 1H), 7.52 – 7.48 (m, 1H), 7.41 (d, *J* = 6.2 Hz, 2H), 7.35 (d, *J* = 7.8 Hz, 2H), 7.30 – 7.25 (m, 6H), 7.07 (t, *J* = 6.7 Hz, 1H), 2.43 (s, 3H); <sup>13</sup>C NMR (100 MHz, CDCl<sub>3</sub>) δ 194.4, 164.8, 146.2, 140.6, 138.3, 134.9, 134.8, 133.6, 132.9, 132.2, 130.4, 130.0, 129.0, 128.9, 128.5, 128.1, 127.5, 127.4, 126.5, 126.2, 124.1, 122.6, 121.2, 119.1, 21.7; IR (neat): 3278 (br), 2924, 1732, 1682, 1628, 1594, 1528, 1490, 1378, 1294, 1174, 1067, 1013, 967, 669; HRMS (ESI) *m/z*: [M + H]<sup>+</sup> calcd for C<sub>31</sub>H<sub>24</sub>ClN<sub>2</sub>O<sub>4</sub>S 555.1140, found 555.1142.

#### 4-bromo-*N*-(2-(4-phenyl-1-tosyl-1*H*-pyrrole-3-carbonyl)phenyl)benzamide (**3r**)

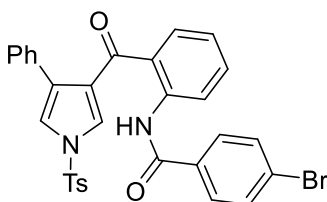

**3r**

The reaction was conducted with 4-bromo-*N*-(2-(3-((4-methyl-*N*-(phenylethynyl)phenyl)sulfonamido)prop-1-yn-1-yl)phenyl)benzamide (**1r**, 0.2 mmol,

116.8 mg), 3,5-dichloropyridine *N*-oxide (**2a**, 0.3 mmol, 49.2 mg), and Cu(CH<sub>3</sub>CN)<sub>4</sub>BF<sub>4</sub> (0.02 mmol, 6.3 mg) in DCE (4.0 mL) at 80 °C (80 °C, heating mantle temperature). Purification by column chromatography on silica gel (petroleum ether/ethyl acetate = 5:1) yielded **3r** (71.6 mg, 60%) as a pale yellow oil.

<sup>1</sup>H NMR (400 MHz, CDCl<sub>3</sub>) δ 11.90 (s, 1H), 8.78 (d, *J* = 8.3 Hz, 1H), 7.85 – 7.79 (m, 5H), 7.60 (t, *J* = 8.8 Hz, 3H), 7.50 – 7.46 (m, 1H), 7.35 (d, *J* = 7.3 Hz, 2H), 7.30 – 7.26 (m, 6H), 7.08 (t, *J* = 7.1 Hz, 1H), 2.44 (s, 3H); <sup>13</sup>C NMR (100 MHz, CDCl<sub>3</sub>) δ 194.4, 164.9, 146.2, 140.6, 134.9, 134.8, 133.6, 133.3, 132.2, 132.0, 130.4, 130.0, 129.0, 128.5, 128.1, 127.5, 127.4, 126.8, 126.5, 126.2, 124.1, 122.7, 121.2, 119.2, 21.7; IR (neat): 3304 (br), 2920, 1682, 1628, 1584, 1507, 1445, 1383, 1308, 1264, 1189, 1067, 1009, 758, 669; HRMS (ESI) *m/z*: [M + H]<sup>+</sup> calcd for C<sub>31</sub>H<sub>24</sub>BrN<sub>2</sub>O<sub>4</sub>S 599.0635, found 599.0634.

#### 4-methyl-*N*-(2-(4-phenyl-1-tosyl-1*H*-pyrrole-3-carbonyl)phenyl)benzamide (**3s**)

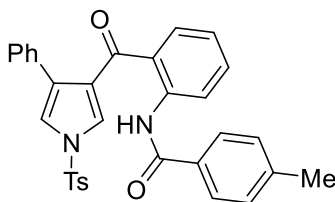

**3s**

The reaction was conducted with 4-methyl-*N*-(2-(3-((4-methyl-*N*-(phenylethynyl)phenyl)sulfonamido)prop-1-yn-1-yl)phenyl)benzamide (**1s**, 0.2 mmol, 103.8 mg), 3,5-dichloropyridine *N*-oxide (**2a**, 0.3 mmol, 49.2 mg), and Cu(CH<sub>3</sub>CN)<sub>4</sub>BF<sub>4</sub> (0.02 mmol, 6.3 mg) in DCE (4.0 mL) at 80 °C (80 °C, heating mantle temperature). Purification by column chromatography on silica gel (petroleum ether/ethyl acetate = 5:1) yielded **3s** (90.5 mg, 85%) as a pale yellow oil.

<sup>1</sup>H NMR (400 MHz, CDCl<sub>3</sub>) δ 11.82 (s, 1H), 8.81 (d, *J* = 8.4 Hz, 1H), 7.88 – 7.82 (m, 4H), 7.77 (d, *J* = 7.9 Hz, 1H), 7.58 (t, *J* = 7.9 Hz, 1H), 7.47 (d, *J* = 2.2 Hz, 1H), 7.35 (d, *J* = 8.2 Hz, 2H), 7.30 – 7.23 (m, 8H), 7.04 (t, *J* = 7.6 Hz, 1H), 2.43 (s, 3H), 2.38 (s, 3H); <sup>13</sup>C NMR (100 MHz, CDCl<sub>3</sub>) δ 194.3, 166.0, 146.1, 142.5, 140.9, 134.9, 134.8, 133.5, 132.2, 131.7, 130.4, 130.0, 129.4, 128.5, 128.1, 127.5(0), 127.4(7), 127.4, 126.7, 126.1, 124.1, 122.3, 121.2, 119.1, 21.7, 21.5; IR (neat): 3284 (br), 2923, 1731, 1679, 1628, 1581,

1506, 1446, 1377, 1266, 1124, 1067, 1019, 967, 670; HRMS (ESI)  $m/z$ :  $[M + H]^+$  calcd for  $C_{32}H_{27}N_2O_4S$  535.1686, found 535.1684.

**4-methoxy-*N*-(2-(4-phenyl-1-tosyl-1*H*-pyrrole-3-carbonyl)phenyl)benzamide (3t)**

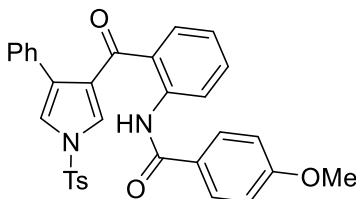

**3t**

The reaction was conducted with 4-methoxy-*N*-(2-(3-((4-methyl-*N*-(phenylethynyl)phenyl)sulfonamido)prop-1-yn-1-yl)phenyl)benzamide (**1t**, 0.2 mmol, 107.0 mg), 3,5-dichloropyridine *N*-oxide (**2a**, 0.3 mmol, 49.2 mg), and  $Cu(CH_3CN)_4BF_4$  (0.02 mmol, 6.3 mg) in DCE (4.0 mL) at 80 °C (80 °C, heating mantle temperature). Purification by column chromatography on silica gel (petroleum ether/ethyl acetate = 5:1) yielded **3t** (78.2 mg, 71%) as a pale yellow oil.

$^1H$  NMR (400 MHz,  $CDCl_3$ )  $\delta$  11.81 (s, 1H), 8.80 (d,  $J = 8.5$  Hz, 1H), 7.95 (d,  $J = 8.8$  Hz, 2H), 7.83 (d,  $J = 8.2$  Hz, 2H), 7.77 (d,  $J = 7.9$  Hz, 1H), 7.58 (t,  $J = 7.9$  Hz, 1H), 7.49 – 7.46 (m, 1H), 7.35 (d,  $J = 8.1$  Hz, 2H), 7.30 – 7.26 (m, 6H), 7.03 (t,  $J = 7.6$  Hz, 1H), 6.94 (d,  $J = 8.8$  Hz, 2H), 3.84 (s, 3H), 2.43 (s, 3H);  $^{13}C$  NMR (100 MHz,  $CDCl_3$ )  $\delta$  194.4, 165.5, 162.6, 146.1, 141.0, 134.9, 134.8, 133.6, 132.2, 130.4, 130.0, 129.4, 128.5, 128.1, 127.5, 127.4, 126.8, 126.7, 126.1, 124.0, 122.1, 121.1, 119.1, 113.9, 55.4, 21.7.; IR (neat): 3286 (br), 2925, 1729, 1677, 1626, 1581, 1507, 1446, 1375, 1253, 1114, 1067, 1028, 906, 669; HRMS (ESI)  $m/z$ :  $[M + H]^+$  calcd for  $C_{32}H_{27}N_2O_5S$  551.1635, found 551.1633.

***N*-(2-(4-phenyl-1-tosyl-1*H*-pyrrole-3-carbonyl)phenyl)acetamide (3u)**

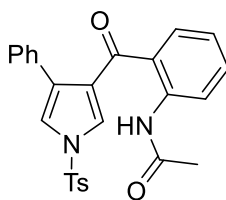

### 3u

The reaction was conducted with *N*-(2-(3-((4-methyl-*N*-(phenylethynyl)phenyl)sulfonamido)prop-1-yn-1-yl)phenyl)acetamide (**1u**, 0.2 mmol, 88.6 mg), 3,5-dichloropyridine *N*-oxide (**2a**, 0.3 mmol, 49.2 mg), and Cu(CH<sub>3</sub>CN)<sub>4</sub>BF<sub>4</sub> (0.02 mmol, 6.3 mg) in DCE (4.0 mL) at 80 °C (80 °C, heating mantle temperature). Purification by column chromatography on silica gel (petroleum ether/ethyl acetate = 5:1) yielded **3u** (72.3 mg, 78%) as a pale yellow oil.

<sup>1</sup>H NMR (400 MHz, CDCl<sub>3</sub>) δ 10.76 (s, 1H), 8.57 (d, *J* = 8.4 Hz, 1H), 7.83 (d, *J* = 8.4 Hz, 2H), 7.75 (d, *J* = 7.9 Hz, 1H), 7.55 (t, *J* = 7.3 Hz, 1H), 7.43 (d, *J* = 2.3 Hz, 1H), 7.36 (d, *J* = 8.3 Hz, 2H), 7.31 – 7.26 (m, 6H), 7.06 (t, *J* = 7.6 Hz, 1H), 2.45 (s, 3H), 2.13 (s, 3H); <sup>13</sup>C NMR (100 MHz, CDCl<sub>3</sub>) δ 193.6, 169.2, 146.2, 140.2, 134.9, 134.5, 133.0, 132.2, 130.4, 130.2, 128.5, 128.2, 127.6, 127.4, 126.8, 126.4, 124.2, 122.3, 121.3, 119.3, 25.3, 21.7; IR (neat): 3370 (br), 2924, 1696, 1631, 1596, 1581, 1517, 1448, 1374, 1266, 1173, 1067, 1008, 967, 669; HRMS (ESI) *m/z*: [M + H]<sup>+</sup> calcd for C<sub>26</sub>H<sub>23</sub>N<sub>2</sub>O<sub>4</sub>S 459.1373, found 459.1370.

### (2-(methylamino)phenyl)(4-phenyl-1-tosyl-1*H*-pyrrol-3-yl)methanone (3v)

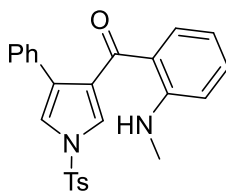

### 3v

The reaction was conducted with 4-methyl-*N*-(3-(2-(methylamino)phenyl)prop-2-yn-1-yl)-*N*-(phenylethynyl)benzenesulfonamide (**1v**, 0.2 mmol, 88.6 mg), 3,5-dichloropyridine *N*-oxide (**2a**, 0.3 mmol, 49.2 mg), and Cu(CH<sub>3</sub>CN)<sub>4</sub>BF<sub>4</sub> (0.02 mmol, 6.3 mg) in DCE (4.0 mL) at 80 °C (80 °C, heating mantle temperature). Purification by column chromatography on silica gel (petroleum ether/ethyl acetate = 5:1) yielded **3v** (60.6 mg, 70%) as a pale yellow oil.

<sup>1</sup>H NMR (400 MHz, CDCl<sub>3</sub>) δ 8.54 (s, 1H), 7.81 (d, *J* = 8.2 Hz, 2H), 7.67 (d, *J* = 7.9 Hz, 1H), 7.40 – 7.32 (m, 4H), 7.27 – 7.20 (m, 6H), 6.69 (d, *J* = 8.5 Hz, 1H), 6.51 (t, *J* = 7.5 Hz, 1H), 2.88 (d, *J* = 5.0 Hz, 3H), 2.43 (s, 3H); <sup>13</sup>C NMR (100 MHz, CDCl<sub>3</sub>) δ 193.0,

152.5, 145.8, 135.3, 134.8, 132.7, 130.3, 130.0, 128.4, 127.9, 127.2, 123.9, 118.4, 118.3, 113.8, 110.9, 29.3, 21.7; IR (neat): 3370 (br), 2924, 1696, 1631, 1596, 1581, 1517, 1448, 1374, 1266, 1173, 1067, 1008, 967, 669; HRMS (ESI)  $m/z$ :  $[M + H]^+$  calcd for  $C_{26}H_{23}N_2O_4S$  459.1373, found 459.1370.

***N*-(3-(5-oxo-4-phenyl-1-tosyl-2,5-dihydro-1*H*-pyrrole-3-carbonyl)phenyl)benzamide (3wa)**

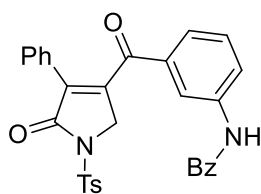

**3wa**

The reaction was conducted with *N*-(3-(3-((4-methyl-*N*-(phenylethynyl)phenyl)sulfonamido)prop-1-yn-1-yl)phenyl)benzamide (**1w**, 0.2 mmol, 101.0 mg), 3,5-dichloropyridine *N*-oxide (**2a**, 0.6 mmol, 98.4 mg),  $Cu(CH_3CN)_4BF_4$  (0.02 mmol, 6.3 mg) in DCE (4.0 mL) at 80 °C (80 °C, heating mantle temperature). Purification by column chromatography on silica gel (petroleum ether/ethyl acetate = 4:1) yielded **3wa** (71.0 mg, 66%) as a pale yellow oil.

$^1H$  NMR (400 MHz,  $CDCl_3$ )  $\delta$  8.06 – 8.02 (m, 2H), 7.90 (d,  $J = 8.2$  Hz, 2H), 7.79 (s, 1H), 7.71 (d,  $J = 7.6$  Hz, 2H), 7.45 – 7.30 (m, 4H), 7.24 – 7.19 (m, 5H), 7.14 – 7.03 (m, 3H), 4.76 (s, 2H), 2.33 (s, 3H);  $^{13}C$  NMR (100 MHz,  $CDCl_3$ )  $\delta$  192.1, 166.8, 165.7, 147.9, 145.7, 138.8, 136.5, 135.0, 134.7, 134.2, 132.1, 129.9, 129.8, 129.6, 129.2, 128.8, 128.6, 128.3(4), 128.2(8), 127.0, 125.8, 125.1, 120.6, 50.8, 21.7; IR (neat): 3358 (br), 2922, 1725, 1653, 1592, 1539, 1483, 1431, 1362, 1327, 1259, 1171, 1089, 668, 583; HRMS (ESI)  $m/z$ :  $[M + H]^+$  calcd for  $C_{31}H_{25}N_2O_5S$  537.1479, found 537.1475.

**2-(5-oxo-4-phenyl-1-tosyl-2,5-dihydro-1*H*-pyrrole-3-carbonyl)phenyl benzoate (3xa)**



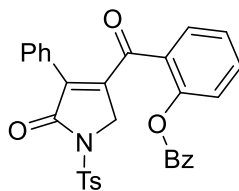

**3xa**

The reaction was conducted with 2-(3-((4-methyl-*N*-(phenylethynyl)phenyl)sulfonamido)prop-1-yn-1-yl)phenyl benzoate (**1x**, 0.2 mmol, 101.2 mg), 3,5-dichloropyridine *N*-oxide (**2a**, 0.6 mmol, 98.4 mg), Cu(CH<sub>3</sub>CN)<sub>4</sub>BF<sub>4</sub> (0.02 mmol, 6.3 mg) in DCE (4.0 mL) at 80 °C (80 °C, heating mantle temperature). Purification by column chromatography on silica gel (petroleum ether/ethyl acetate = 4:1) yielded **3xa** (82.8 mg, 77%) as a pale yellow oil.

<sup>1</sup>H NMR (400 MHz, CDCl<sub>3</sub>) δ 8.11 (d, *J* = 8.0 Hz, 2H), 7.94 (d, *J* = 8.0 Hz, 2H), 7.68 (t, *J* = 7.0 Hz, 1H), 7.55 – 7.52 (m, 3H), 7.44 (t, *J* = 7.8 Hz, 1H), 7.31 (d, *J* = 8.0 Hz, 2H), 7.26 – 7.23 (m, 2H), 7.19 – 7.06 (m, 5H), 4.69 (s, 2H), 2.42 (s, 3H); <sup>13</sup>C NMR (100 MHz, CDCl<sub>3</sub>) δ 190.1, 166.6, 164.8, 149.4, 147.1, 145.5, 137.9, 134.8, 134.4, 134.3, 131.0, 130.0, 129.8, 129.7, 129.6, 129.0, 128.9, 128.5, 128.2, 128.1, 128.0, 125.9, 123.4, 50.2, 21.7; IR (neat): 2920, 1730, 1653, 1600, 1492, 1448, 1368, 1327, 1261, 1189, 1172, 1089, 1058, 964, 668; HRMS (ESI) *m/z*: [M + H]<sup>+</sup> calcd for C<sub>31</sub>H<sub>24</sub>NO<sub>6</sub>S 538.1319, found 538.1318.

#### 4-benzoyl-3-phenyl-1-tosyl-1,5-dihydro-2*H*-pyrrol-2-one (**3ya**)

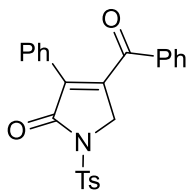

**3ya**

The reaction was conducted with 4-methyl-*N*-(phenylethynyl)-*N*-(3-phenylprop-2-yn-1-yl)benzenesulfonamide (**1y**, 0.2 mmol, 77.0 mg), 3,5-dichloropyridine *N*-oxide (**2a**, 0.6 mmol, 98.4 mg), and Cu(CH<sub>3</sub>CN)<sub>4</sub>PF<sub>6</sub> (0.02 mmol, 7.5 mg) in DCE (4.0 mL) at 80 °C

(80 °C, heating mantle temperature). Purification by column chromatography on silica gel (petroleum ether/ethyl acetate = 5:1) yielded **3ya** (60.3 mg, 72%) as a pale yellow oil. <sup>1</sup>H NMR (400 MHz, CDCl<sub>3</sub>) δ 8.04 (d, *J* = 7.6 Hz, 2H), 7.67 (d, *J* = 7.3 Hz, 2H), 7.46 (t, *J* = 6.8 Hz, 1H), 7.37 (d, *J* = 7.6 Hz, 2H), 7.29 – 7.26 (m, 4H), 7.21 – 7.13 (m, 3H), 4.80 (s, 2H), 2.44 (s, 3H); <sup>13</sup>C NMR (100 MHz, CDCl<sub>3</sub>) δ 192.5, 166.6, 147.6, 145.6, 136.4, 134.8, 134.4, 134.2, 129.9, 129.7, 129.4, 129.2, 128.7, 128.6, 128.4, 128.3, 50.6, 21.7; IR (neat): 2923, 1724, 1653, 1596, 1493, 1448, 1365, 1328, 1254, 1188, 1172, 1115, 1090, 963, 667; HRMS (ESI) *m/z*: [M + H]<sup>+</sup> calcd for C<sub>24</sub>H<sub>20</sub>NO<sub>4</sub>S 418.1108, found 418.1106.

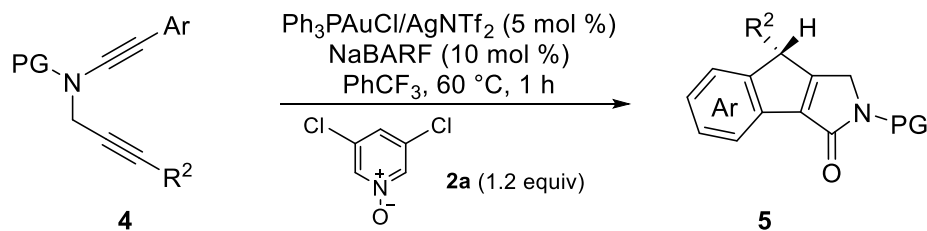

### General procedure for the synthesis of dihydroindeno[1,2-*c*]pyrrol-3(2*H*)-ones **5**:

3,5-Dichloropyridine *N*-oxide **2a** (0.24 mmol, 39.4 mg), PPh<sub>3</sub>AuCl (0.01 mmol, 5.0 mg), AgNTf<sub>2</sub> (0.01 mmol, 3.9 mg), and NaBARF (0.02 mmol, 17.7 mg) were added in this order to the diynes **4** (0.2 mmol) in PhCF<sub>3</sub> (4.0 mL) at room temperature. The reaction mixture was stirred at 60 °C (60 °C, heating mantle temperature) and the progress of the reaction was monitored by TLC. The reaction typically took 1 h. Upon completion, the mixture was then concentrated and the residue was purified by chromatography on silica gel (eluent: petroleum ether/ethyl acetate) to afford the desired products **5**.

### 8-methyl-2-tosyl-1,8-dihydroindeno[1,2-*c*]pyrrol-3(2*H*)-one (**5a**)

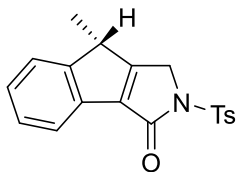

**5a**

The reaction was conducted with *N*-(but-2-yn-1-yl)-4-methyl-*N*-(phenylethynyl)benzenesulfonamide (**4a**, 0.2 mmol, 64.6 mg), 3,5-dichloropyridine *N*-oxide (**2a**, 0.24 mmol, 39.4 mg), PPh<sub>3</sub>AuCl (0.01 mmol, 5.0 mg), AgNTf<sub>2</sub> (0.01 mmol, 3.9 mg), and NaBARF (0.02 mmol, 17.7 mg) in PhCF<sub>3</sub> (4.0 mL) at 60 °C (60 °C, heating mantle temperature). Purification by column chromatography on silica gel (petroleum ether/ethyl acetate = 10:1) yielded **5a** (48.8 mg, 72%) as a yellow solid (mp 174-176 °C). <sup>1</sup>H NMR (400 MHz, CDCl<sub>3</sub>) δ 8.02 (d, *J* = 7.2 Hz, 2H), 7.62 (d, *J* = 6.7 Hz, 1H), 7.42 (d, *J* = 6.3 Hz, 1H), 7.34 (d, *J* = 7.7 Hz, 2H), 7.29 – 7.28 (m, 2H), 4.73 (s, 2H), 3.74 (q, *J* = 7.2 Hz, 1H), 2.42 (s, 3H), 1.43 (d, *J* = 7.6 Hz, 3H); <sup>13</sup>C NMR (100 MHz, CDCl<sub>3</sub>) δ 169.5, 163.5, 151.2, 145.0, 139.0, 135.6, 134.3, 129.7, 128.0, 127.3, 126.7, 123.5, 120.9, 49.4, 42.3, 21.6, 15.5; IR (neat): 2922, 1724, 1597, 1362, 1307, 1169, 1132, 1090, 672, 580, 545; HRMS (ESI) *m/z*: [M + H]<sup>+</sup> calcd for C<sub>19</sub>H<sub>18</sub>NO<sub>3</sub>S 340.1002, found 340.1001.

### 8-methyl-2-(phenylsulfonyl)-1,8-dihydroindeno[1,2-*c*]pyrrol-3(2*H*)-one (**5b**)

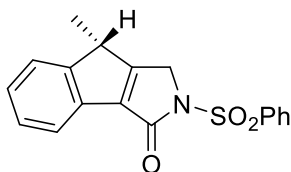

**5b**

The reaction was conducted with *N*-(but-2-yn-1-yl)-*N*-(phenylethynyl)benzenesulfonamide (**4b**, 0.2 mmol, 61.8 mg), 3,5-dichloropyridine *N*-oxide (**2a**, 0.24 mmol, 39.4 mg), PPh<sub>3</sub>AuCl (0.01 mmol, 5.0 mg), AgNTf<sub>2</sub> (0.01 mmol, 3.9 mg), and NaBARF (0.02 mmol, 17.7 mg) in PhCF<sub>3</sub> (4.0 mL) at 60 °C (60 °C, heating mantle temperature). Purification by column chromatography on silica gel (petroleum ether/ethyl acetate = 10:1) yielded **5b** (54.0 mg, 83%) as a pale yellow oil.

<sup>1</sup>H NMR (400 MHz, CDCl<sub>3</sub>) δ 8.14 (d, *J* = 7.3 Hz, 2H), 7.66 – 7.61 (m, 2H), 7.57 – 7.54 (m, 2H), 7.42 (d, *J* = 6.2 Hz, 1H), 7.31 – 7.26 (m, 2H), 4.74 (s, 2H), 3.75 (q, *J* = 7.2 Hz, 1H), 1.43 (d, *J* = 7.4 Hz, 3H); <sup>13</sup>C NMR (100 MHz, CDCl<sub>3</sub>) δ 169.7, 163.5, 151.2, 138.9, 138.5, 134.2, 133.9, 129.1, 127.9, 127.3, 126.7, 123.5, 120.9, 49.5, 42.3, 15.4; IR (neat): 2930, 1738, 1448, 1360, 1307, 1171, 1134, 1090, 775, 608, 569; HRMS (ESI) *m/z*: [M + H]<sup>+</sup> calcd for C<sub>18</sub>H<sub>16</sub>NO<sub>3</sub>S 326.0845, found 326.0844.

**2-((4-methoxyphenyl)sulfonyl)-8-methyl-1,8-dihydroindeno[1,2-*c*]pyrrol-3(2*H*)-one (5c)**

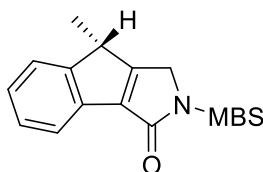

**5c**

The reaction was conducted with *N*-(but-2-yn-1-yl)-4-methoxy-*N*-(phenylethynyl)benzenesulfonamide (**4c**, 0.2 mmol, 67.8 mg), 3,5-dichloropyridine *N*-oxide (**2a**, 0.24 mmol, 39.4 mg), PPh<sub>3</sub>AuCl (0.01 mmol, 5.0 mg), AgNTf<sub>2</sub> (0.01 mmol, 3.9 mg), and NaBARF (0.02 mmol, 17.7 mg) in PhCF<sub>3</sub> (4.0 mL) at 60 °C (60 °C, heating mantle temperature). Purification by column chromatography on silica gel (petroleum ether/ethyl acetate = 10:1) yielded **5c** (62.5 mg, 88%) as a pale yellow oil.

<sup>1</sup>H NMR (400 MHz, CDCl<sub>3</sub>) δ 8.08 (d, *J* = 7.2 Hz, 2H), 7.62 (d, *J* = 6.8 Hz, 1H), 7.42 (d, *J* = 6.7 Hz, 1H), 7.32 – 7.27 (m, 2H), 7.01 (d, *J* = 7.2 Hz, 2H), 4.73 (s, 2H), 3.86 (s, 3H), 3.75 (q, *J* = 7.1 Hz, 1H), 1.44 (d, *J* = 7.6 Hz, 3H); <sup>13</sup>C NMR (100 MHz, CDCl<sub>3</sub>) δ 169.4, 163.9, 163.6, 151.2, 139.1, 134.4, 130.4, 130.1, 127.4, 126.7, 123.5, 120.9, 114.3, 55.7, 49.4, 42.3, 15.5; IR (neat): 2930, 1721, 1595, 1498, 1359, 1263, 1164, 1091, 675, 580, 554; HRMS (ESI) *m/z*: [M + H]<sup>+</sup> calcd for C<sub>19</sub>H<sub>18</sub>NO<sub>4</sub>S 356.0951, found 356.0950.

**2-((4-bromophenyl)sulfonyl)-8-methyl-1,8-dihydroindeno[1,2-*c*]pyrrol-3(2*H*)-one (5d)**

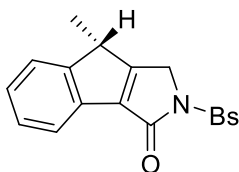

**5d**

The reaction was conducted with 4-bromo-*N*-(but-2-yn-1-yl)-*N*-(phenylethynyl)benzenesulfonamide (**4d**, 0.2 mmol, 77.6 mg), 3,5-dichloropyridine *N*-

oxide (**2a**, 0.24 mmol, 39.4 mg), PPh<sub>3</sub>AuCl (0.01 mmol, 5.0 mg), AgNTf<sub>2</sub> (0.01 mmol, 3.9 mg), and NaBARF (0.02 mmol, 17.7 mg) in PhCF<sub>3</sub> (4.0 mL) at 60 °C (60 °C, heating mantle temperature). Purification by column chromatography on silica gel (petroleum ether/ethyl acetate = 10:1) yielded **5d** (56.6 mg, 70%) as a pale yellow oil.

<sup>1</sup>H NMR (400 MHz, CDCl<sub>3</sub>) δ 7.92 (d, *J* = 7.2 Hz, 2H), 7.61 (d, *J* = 7.2 Hz, 2H), 7.54 (d, *J* = 6.8 Hz, 1H), 7.35 (d, *J* = 6.8 Hz, 1H), 7.25 – 7.21 (m, 2H), 4.65 (s, 2H), 3.68 (q, *J* = 7.7 Hz, 1H), 1.36 (d, *J* = 7.5 Hz, 3H); <sup>13</sup>C NMR (100 MHz, CDCl<sub>3</sub>) δ 169.8, 163.5, 151.1, 138.9, 137.5, 134.1, 132.4, 129.5, 129.3, 127.4, 126.8, 123.6, 120.9, 49.5, 42.4, 15.5; IR (neat): 2930, 1736, 1574, 1471, 1364, 1172, 1133, 1068, 744, 616, 572; HRMS (ESI) *m/z*: [M + H]<sup>+</sup> calcd for C<sub>18</sub>H<sub>15</sub>BrNO<sub>3</sub>S 403.9951, found 403.9950.

### 6-fluoro-8-methyl-2-tosyl-1,8-dihydroindeno[1,2-*c*]pyrrol-3(2*H*)-one (**5e**)

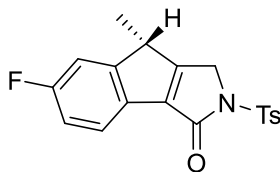

**5e**

The reaction was conducted with *N*-(but-2-yn-1-yl)-*N*-((4-fluorophenyl)ethynyl)-4-methylbenzenesulfonamide (**4e**, 0.2 mmol, 68.2 mg), 3,5-dichloropyridine *N*-oxide (**2a**, 0.24 mmol, 39.4 mg), PPh<sub>3</sub>AuCl (0.01 mmol, 5.0 mg), AgNTf<sub>2</sub> (0.01 mmol, 3.9 mg), and NaBARF (0.02 mmol, 17.7 mg) in PhCF<sub>3</sub> (4.0 mL) at 60 °C (60 °C, heating mantle temperature). Purification by column chromatography on silica gel (petroleum ether/ethyl acetate = 10:1) yielded **5e** (36.4 mg, 51%) as a pale yellow oil.

<sup>1</sup>H NMR (400 MHz, CDCl<sub>3</sub>) δ 7.94 (d, *J* = 8.2 Hz, 2H), 7.51 – 7.43 (m, 1H), 7.27 (d, *J* = 7.4 Hz, 2H), 7.06 (d, *J* = 8.6 Hz, 1H), 6.93 (t, *J* = 8.5 Hz, 1H), 4.64 (s, 2H), 3.67 (q, *J* = 7.1 Hz, 1H), 2.35 (s, 3H), 1.36 (d, *J* = 6.3 Hz, 3H); <sup>13</sup>C NMR (100 MHz, CDCl<sub>3</sub>) δ 168.7, 163.4 (d, *J* = 20.0 Hz), 161.0, 153.5 (d, *J* = 8.0 Hz), 145.1, 138.4, 135.6, 130.4 (d, *J* = 2.0 Hz), 129.8, 128.1, 121.8 (d, *J* = 9.0 Hz), 114.3 (d, *J* = 23.0 Hz), 111.7 (d, *J* = 24.0 Hz), 49.3, 42.4, 21.7, 15.5; IR (neat): 2922, 1724, 1598, 1509, 1360, 1307, 1162, 1091, 814, 665, 546; HRMS (ESI) *m/z*: [M + H]<sup>+</sup> calcd for C<sub>19</sub>H<sub>17</sub>FNO<sub>3</sub>S 358.0908, found 358.0907.

**6-chloro-8-methyl-2-tosyl-1,8-dihydroindeno[1,2-c]pyrrol-3(2H)-one (5f)**

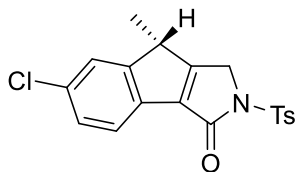

**5f**

The reaction was conducted with *N*-(but-2-yn-1-yl)-*N*-((4-chlorophenyl)ethynyl)-4-methylbenzenesulfonamide (**4f**, 0.2 mmol, 71.6 mg), 3,5-dichloropyridine *N*-oxide (**2a**, 0.24 mmol, 39.4 mg), PPh<sub>3</sub>AuCl (0.01 mmol, 5.0 mg), AgNTf<sub>2</sub> (0.01 mmol, 3.9 mg), and NaBARF (0.02 mmol, 17.7 mg) in PhCF<sub>3</sub> (4.0 mL) at 60 °C (60 °C, heating mantle temperature). Purification by column chromatography on silica gel (petroleum ether/ethyl acetate = 10:1) yielded **5f** (34.4 mg, 46%) as a pale yellow oil.

<sup>1</sup>H NMR (400 MHz, CDCl<sub>3</sub>) δ 8.02 (d, *J* = 7.1 Hz, 2H), 7.53 (d, *J* = 7.5 Hz, 1H), 7.40 – 7.35 (m, 3H), 7.30 – 7.27 (m, 1H), 4.73 (s, 2H), 3.75 (q, *J* = 7.4 Hz, 1H), 2.43 (s, 3H), 1.44 (d, *J* = 7.6 Hz, 3H); <sup>13</sup>C NMR (100 MHz, CDCl<sub>3</sub>) δ 169.4, 163.2, 152.8, 145.2, 138.5, 135.5, 132.8 (9), 132.8 (6), 129.8, 128.1, 127.7, 124.3, 121.7, 49.3, 42.4, 21.7, 15.4; IR (neat): 2927, 1731, 1597, 1440, 1362, 1303, 1170, 1091, 662, 588, 545; HRMS (ESI) *m/z*: [M + H]<sup>+</sup> calcd for C<sub>19</sub>H<sub>17</sub>ClNO<sub>3</sub>S 374.0612, found 374.0611.

**6-bromo-8-methyl-2-tosyl-1,8-dihydroindeno[1,2-c]pyrrol-3(2H)-one (5g)**

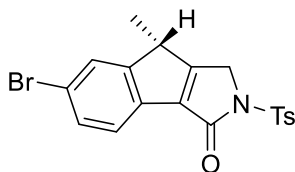

**5g**

The reaction was conducted with *N*-((4-bromophenyl)ethynyl)-*N*-(but-2-yn-1-yl)-4-methylbenzenesulfonamide (**4g**, 0.2 mmol, 80.4 mg), 3,5-dichloropyridine *N*-oxide (**2a**, 0.24 mmol, 39.4 mg), PPh<sub>3</sub>AuCl (0.01 mmol, 5.0 mg), AgNTf<sub>2</sub> (0.01 mmol, 3.9 mg), and NaBARF (0.02 mmol, 17.7 mg) in PhCF<sub>3</sub> (4.0 mL) at 60 °C (60 °C, heating mantle

temperature). Purification by column chromatography on silica gel (petroleum ether/ethyl acetate = 10:1) yielded **5g** (39.3 mg, 47%) as a pale yellow oil.

<sup>1</sup>H NMR (400 MHz, CDCl<sub>3</sub>) δ 7.94 (d, *J* = 8.4 Hz, 2H), 7.48 (s, 1H), 7.42 – 7.35 (m, 2H), 7.28 (d, *J* = 8.1 Hz, 2H), 4.64 (s, 2H), 3.67 (q, *J* = 15.2, 7.6 Hz, 1H), 2.36 (s, 3H), 1.36 (d, *J* = 7.7 Hz, 3H); <sup>13</sup>C NMR (100 MHz, CDCl<sub>3</sub>) δ 169.4, 163.1, 153.1, 145.2, 138.5, 135.5, 133.3, 130.6, 129.8, 128.1, 127.1, 122.1, 120.9, 49.3, 42.4, 21.7, 15.3; IR (neat): 2925, 1729, 1596, 1462, 1362, 1302, 1169, 1090, 674, 586, 545; HRMS (ESI) *m/z*: [M + H]<sup>+</sup> calcd for C<sub>19</sub>H<sub>17</sub>BrNO<sub>3</sub>S 418.0107, found 418.0105.

### 8-methyl-2-tosyl-6-(trifluoromethyl)-1,8-dihydroindeno[1,2-*c*]pyrrol-3(2*H*)-one (**5h**)

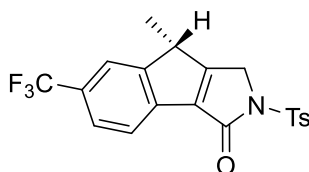

**5h**

The reaction was conducted with *N*-(but-2-yn-1-yl)-4-methyl-*N*-((4-(trifluoromethyl)phenyl)ethynyl)benzenesulfonamide (**4h**, 0.2 mmol, 78.2 mg), 3,5-dichloropyridine *N*-oxide (**2a**, 0.24 mmol, 39.4 mg), PPh<sub>3</sub>AuCl (0.01 mmol, 5.0 mg), AgNTf<sub>2</sub> (0.01 mmol, 3.9 mg), and NaBARF (0.02 mmol, 17.7 mg) in PhCF<sub>3</sub> (4.0 mL) at 60 °C (60 °C, heating mantle temperature). Purification by column chromatography on silica gel (petroleum ether/ethyl acetate = 10:1) yielded **5h** (59.4 mg, 73%) as a pale yellow oil.

<sup>1</sup>H NMR (400 MHz, CDCl<sub>3</sub>) δ 7.95 (d, *J* = 8.3 Hz, 2H), 7.64 (d, *J* = 7.8 Hz, 1H), 7.58 (s, 1H), 7.51 (d, *J* = 8.0 Hz, 1H), 7.29 (d, *J* = 8.1 Hz, 2H), 4.70 (s, 2H), 3.76 (q, *J* = 7.6 Hz, 1H), 2.36 (s, 3H), 1.40 (d, *J* = 7.7 Hz, 3H); <sup>13</sup>C NMR (100 MHz, CDCl<sub>3</sub>) δ 171.6, 162.9, 151.5, 145.3, 138.5, 137.7, 135.5, 129.8, 128.1, 125.0 (q, *J* = 3.8 Hz), 121.1, 120.5, 120.4, 49.5, 42.6, 21.7, 15.2; IR (neat): 2925, 1734, 1597, 1433, 1361, 1326, 1170, 1090, 672, 610, 577; HRMS (ESI) *m/z*: [M + H]<sup>+</sup> calcd for C<sub>20</sub>H<sub>17</sub>F<sub>3</sub>NO<sub>3</sub>S 408.0876, found 408.0875.

### 5,7-dichloro-8-methyl-2-tosyl-1,8-dihydroindeno[1,2-*c*]pyrrol-3(2*H*)-one (**5i**)

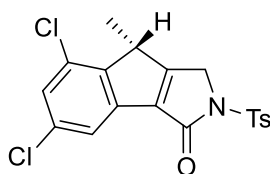

**5i**

The reaction was conducted with *N*-(but-2-yn-1-yl)-*N*-((3,5-dichlorophenyl)ethynyl)-4-methylbenzenesulfonamide (**4i**, 0.2 mmol, 78.4 mg), 3,5-dichloropyridine *N*-oxide (**2a**, 0.24 mmol, 39.4 mg), PPh<sub>3</sub>AuCl (0.01 mmol, 5.0 mg), AgNTf<sub>2</sub> (0.01 mmol, 3.9 mg), and NaBARF (0.02 mmol, 17.7 mg) in PhCF<sub>3</sub> (4.0 mL) at 60 °C (60 °C, heating mantle temperature). Purification by column chromatography on silica gel (petroleum ether/ethyl acetate = 10:1) yielded **5i** (54.7 mg, 67%) as a pale yellow oil.

<sup>1</sup>H NMR (400 MHz, CDCl<sub>3</sub>) δ 7.94 (d, *J* = 7.3 Hz, 2H), 7.45 (s, 1H), 7.28 (d, *J* = 7.8 Hz, 2H), 7.16 (s, 1H), 4.67 (s, 2H), 3.82 (q, *J* = 7.3 Hz, 1H), 2.36 (s, 3H), 1.45 (d, *J* = 7.5 Hz, 3H); <sup>13</sup>C NMR (100 MHz, CDCl<sub>3</sub>) δ 171.3, 162.6, 145.8, 145.3, 137.5, 137.3, 135.3, 134.5, 130.7, 129.8, 128.1, 127.0, 120.0, 49.3, 42.7, 21.7, 13.7; IR (neat): 2921, 1727, 1595, 1422, 1361, 1298, 1170, 1095, 837, 600, 543; HRMS (ESI) *m/z*: [M + H]<sup>+</sup> calcd for C<sub>19</sub>H<sub>16</sub>Cl<sub>2</sub>NO<sub>3</sub>S 408.0222, found 408.0223.

#### 6,8-dimethyl-2-tosyl-1,8-dihydroindeno[1,2-*c*]pyrrol-3(2*H*)-one (**5j**)

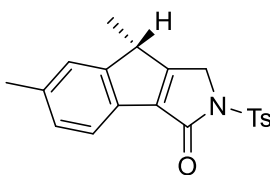

**5j**

The reaction was conducted with *N*-(but-2-yn-1-yl)-4-methyl-*N*-(*p*-tolylethynyl)benzenesulfonamide (**4j**, 0.2 mmol, 67.4 mg), 3,5-dichloropyridine *N*-oxide (**2a**, 0.24 mmol, 39.4 mg), PPh<sub>3</sub>AuCl (0.01 mmol, 5.0 mg), AgNTf<sub>2</sub> (0.01 mmol, 3.9 mg), and NaBARF (0.02 mmol, 17.7 mg) in PhCF<sub>3</sub> (4.0 mL) at 60 °C (60 °C, heating mantle temperature). Purification by column chromatography on silica gel (petroleum ether/ethyl acetate = 4:1) yielded **5j** (57.2 mg, 81%) as a pale yellow oil.



$^1\text{H}$  NMR (400 MHz,  $\text{CDCl}_3$ )  $\delta$  8.01 (d,  $J = 7.5$  Hz, 2H), 7.49 (d,  $J = 7.6$  Hz, 1H), 7.34 (d,  $J = 7.6$  Hz, 2H), 7.23 (s, 1H), 7.10 (d,  $J = 7.6$  Hz, 1H), 4.70 (s, 2H), 3.70 (q,  $J = 7.4$  Hz, 1H), 2.42 (s, 3H), 2.39 (s, 3H), 1.41 (d,  $J = 7.6$  Hz, 3H);  $^{13}\text{C}$  NMR (100 MHz,  $\text{CDCl}_3$ )  $\delta$  168.7, 163.6, 151.5, 144.9, 138.9, 136.7, 135.7, 131.6, 129.7, 128.0, 124.4, 120.5, 49.4, 42.1, 21.6 (3), 21.6 (0), 15.6; IR (neat): 2921, 1731, 1597, 1441, 1359, 1304, 1171, 1090, 820, 674, 584; HRMS (ESI)  $m/z$ :  $[\text{M} + \text{H}]^+$  calcd for  $\text{C}_{20}\text{H}_{20}\text{NO}_3\text{S}$  354.1158, found 354.1156.

### 5,7,8-trimethyl-2-tosyl-1,8-dihydroindeno[1,2-*c*]pyrrol-3(2*H*)-one (5k)

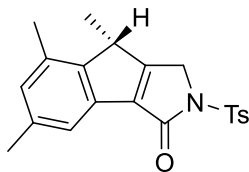

**5k**

The reaction was conducted with *N*-(but-2-yn-1-yl)-*N*-((3,5-dimethylphenyl)ethynyl)-4-methylbenzenesulfonamide (**4k**, 0.2 mmol, 70.2 mg), 3,5-dichloropyridine *N*-oxide (**2a**, 0.24 mmol, 39.4 mg),  $\text{PPh}_3\text{AuCl}$  (0.01 mmol, 5.0 mg),  $\text{AgNTf}_2$  (0.01 mmol, 3.9 mg), and NaBARF (0.02 mmol, 17.7 mg) in  $\text{PhCF}_3$  (4.0 mL) at 60 °C (60 °C, heating mantle temperature). Purification by column chromatography on silica gel (petroleum ether/ethyl acetate = 10:1) yielded **5k** (52.1 mg, 71%) as a pale yellow oil.

$^1\text{H}$  NMR (400 MHz,  $\text{CDCl}_3$ )  $\delta$  8.01 (d,  $J = 7.7$  Hz, 2H), 7.35 – 7.29 (m, 3H), 6.87 (s, 1H), 4.70 (s, 2H), 3.75 (q,  $J = 7.2$  Hz, 1H), 2.42 (s, 3H), 2.37 (s, 3H), 2.31 (s, 3H), 1.41 (d,  $J = 7.4$  Hz, 3H);  $^{13}\text{C}$  NMR (100 MHz,  $\text{CDCl}_3$ )  $\delta$  169.8, 163.8, 146.1, 144.9, 138.6, 137.5, 135.7, 134.4, 133.5, 129.7, 129.3, 128.0, 119.3, 49.3, 41.6, 21.6, 21.1, 18.6, 14.7; IR (neat): 2923, 1730, 1597, 1443, 1360, 1170, 1123, 1089, 851, 665, 545; HRMS (ESI)  $m/z$ :  $[\text{M} + \text{H}]^+$  calcd for  $\text{C}_{21}\text{H}_{22}\text{NO}_3\text{S}$  368.1315, found 368.1316.

### 8-ethyl-2-tosyl-1,8-dihydroindeno[1,2-*c*]pyrrol-3(2*H*)-one (5l)

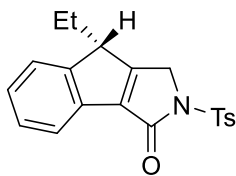

**5l**

The reaction was conducted with 4-methyl-*N*-(pent-2-yn-1-yl)-*N*-(phenylethynyl)benzenesulfonamide (**4l**, 0.2 mmol, 107.8 mg), 3,5-dichloropyridine *N*-oxide (**2a**, 0.24 mmol, 39.4 mg), PPh<sub>3</sub>AuCl (0.01 mmol, 5.0 mg), AgNTf<sub>2</sub> (0.01 mmol, 3.9 mg), and NaBARF (0.02 mmol, 17.7 mg) in PhCF<sub>3</sub> (4.0 mL) at 60 °C (60 °C, heating mantle temperature). Purification by column chromatography on silica gel (petroleum ether/ethyl acetate = 10:1) yielded **5l** (56.5 mg, 80%) as a pale yellow oil.

<sup>1</sup>H NMR (400 MHz, CDCl<sub>3</sub>) δ 8.01 (d, *J* = 7.6 Hz, 2H), 7.61 (d, *J* = 6.7 Hz, 1H), 7.41 (d, *J* = 6.4 Hz, 1H), 7.34 (d, *J* = 7.8 Hz, 2H), 7.29 – 7.22 (m, 2H), 4.76 (d, *J* = 5.5 Hz, 2H), 3.69 (t, *J* = 10.8 Hz, 1H), 2.42 (s, 3H), 2.09 – 2.00 (m, 1H), 1.83 – 1.74 (m, 1H), 0.90 (t, *J* = 7.2 Hz, 3H); <sup>13</sup>C NMR (100 MHz, CDCl<sub>3</sub>) δ 168.2, 163.5, 149.4, 145.0, 139.9, 135.6, 134.9, 129.8, 128.0, 127.4, 126.6, 123.8, 120.9, 50.2, 49.3, 23.7, 21.7, 11.1; IR (neat): 2931, 1728, 1597, 1458, 1360, 1170, 1133, 1091, 776, 671, 544; HRMS (ESI) *m/z*: [M + H]<sup>+</sup> calcd for C<sub>20</sub>H<sub>20</sub>NO<sub>3</sub>S 354.1158, found 354.1159.

**8-ethyl-2-((4-methoxyphenyl)sulfonyl)-1,8-dihydroindeno[1,2-*c*]pyrrol-3(2*H*)-one (5m)**

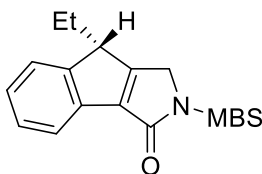

**5m**

The reaction was conducted with 4-methoxy-*N*-(pent-2-yn-1-yl)-*N*-(phenylethynyl)benzenesulfonamide (**4m**, 0.2 mmol, 70.6 mg), 3,5-dichloropyridine *N*-oxide (**2a**, 0.24 mmol, 39.4 mg), PPh<sub>3</sub>AuCl (0.01 mmol, 5.0 mg), AgNTf<sub>2</sub> (0.01 mmol, 3.9 mg), and NaBARF (0.02 mmol, 17.7 mg) in PhCF<sub>3</sub> (4.0 mL) at 60 °C (60 °C, heating

mantle temperature). Purification by column chromatography on silica gel (petroleum ether/ethyl acetate = 10:1) yielded **5m** (53.2 mg, 72%) as a pale yellow oil.

$^1\text{H}$  NMR (400 MHz,  $\text{CDCl}_3$ )  $\delta$  8.08 (d,  $J = 7.7$  Hz, 2H), 7.62 (d,  $J = 7.3$  Hz, 1H), 7.42 (d,  $J = 6.9$  Hz, 1H), 7.32 – 7.27 (m, 2H), 7.01 (d,  $J = 7.8$  Hz, 2H), 4.81 – 4.70 (m, 2H), 3.86 (s, 3H), 3.69 (t, 1H), 2.10 – 2.03 (m, 1H), 1.84 – 1.77 (m, 1H), 0.91 (t,  $J = 7.3$  Hz, 3H);  $^{13}\text{C}$  NMR (100 MHz,  $\text{CDCl}_3$ )  $\delta$  168.1, 163.9, 163.5, 149.5, 139.9, 134.9, 130.3, 130.0, 127.3, 126.6, 123.8, 120.9, 114.3, 55.7, 50.1, 49.3, 23.7, 11.1; IR (neat): 2923, 1729, 1595, 1458, 1361, 1164, 1134, 1090, 835, 675, 587; HRMS (ESI)  $m/z$ :  $[\text{M} + \text{H}]^+$  calcd for  $\text{C}_{20}\text{H}_{20}\text{NO}_4\text{S}$  370.1108, found 370.1107.

### 8-pentyl-2-tosyl-1,8-dihydroindeno[1,2-c]pyrrol-3(2H)-one (**5n**)

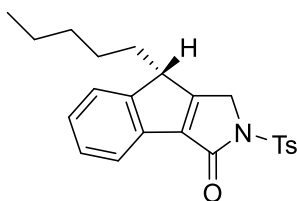

**5n**

The reaction was conducted with 4-methyl-*N*-(oct-2-yn-1-yl)-*N*-(phenylethynyl)benzenesulfonamide (**4n**, 0.2 mmol, 76.0 mg), 3,5-dichloropyridine *N*-oxide (**2a**, 0.24 mmol, 39.4 mg),  $\text{PPh}_3\text{AuCl}$  (0.01 mmol, 5.0 mg),  $\text{AgNTf}_2$  (0.01 mmol, 3.9 mg), and NaBARF (0.02 mmol, 17.7 mg) in  $\text{PhCF}_3$  (4.0 mL) at 60 °C (60 °C, heating mantle temperature). Purification by column chromatography on silica gel (petroleum ether/ethyl acetate = 10:1) yielded **5n** (58.6 mg, 74%) as a pale yellow oil.

$^1\text{H}$  NMR (400 MHz,  $\text{CDCl}_3$ )  $\delta$  8.02 (d,  $J = 7.5$  Hz, 2H), 7.62 (d,  $J = 7.0$  Hz, 1H), 7.41 (d,  $J = 6.9$  Hz, 1H), 7.35 (d,  $J = 7.8$  Hz, 2H), 7.29 – 7.26 (m, 2H), 4.81 – 4.70 (m, 2H), 3.73 – 3.70 (m, 1H), 2.43 (s, 3H), 2.01 – 1.94 (m, 1H), 1.74 – 1.68 (m, 1H), 1.31 (s, 6H), 0.94 – 0.83 (m, 3H);  $^{13}\text{C}$  NMR (100 MHz,  $\text{CDCl}_3$ )  $\delta$  168.5, 163.5, 149.8, 145.0, 139.7, 135.6, 134.7, 129.8, 128.0, 127.3, 126.6, 123.8, 120.9, 50.2, 48.1, 31.8, 30.6, 26.6, 22.4, 21.7, 14.0; IR (neat): 2927, 1730, 1597, 1457, 1360, 1170,

1133, 1089, 777, 671, 544; HRMS (ESI)  $m/z$ :  $[M + H]^+$  calcd for  $C_{23}H_{26}NO_3S$  396.1628, found 396.1629.

**8-(3-phenylpropyl)-2-tosyl-1,8-dihydroindeno[1,2-*c*]pyrrol-3(2*H*)-one (5o)**

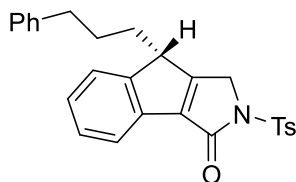

**5o**

The reaction was conducted with 4-methyl-*N*-(phenylethynyl)-*N*-(6-phenylhex-2-yn-1-yl)benzenesulfonamide (**4o**, 0.2 mmol, 85.6 mg), 3,5-dichloropyridine *N*-oxide (**2a**, 0.24 mmol, 39.4 mg),  $PPh_3AuCl$  (0.01 mmol, 5.0 mg),  $AgNTf_2$  (0.01 mmol, 3.9 mg), and NaBARF (0.02 mmol, 17.7 mg) in  $PhCF_3$  (4.0 mL) at 60 °C (60 °C, heating mantle temperature). Purification by column chromatography on silica gel (petroleum ether/ethyl acetate = 10:1) yielded **5o** (46.2 mg, 52%) as a pale yellow oil.

$^1H$  NMR (400 MHz,  $CDCl_3$ )  $\delta$  7.92 (d,  $J = 6.5$  Hz, 2H), 7.53 (d,  $J = 7.2$  Hz, 1H), 7.30 – 7.13 (m, 8H), 7.05 (d,  $J = 6.3$  Hz, 2H), 4.60 (s, 2H), 3.67 – 3.59 (m, 1H), 2.55 (t,  $J = 6.5$  Hz, 2H), 2.34 (s, 3H), 1.96 – 1.88 (m, 1H), 1.73 – 1.65 (m, 1H), 1.61 – 1.48 (m, 2H);  $^{13}C$  NMR (100 MHz,  $CDCl_3$ )  $\delta$  168.1, 163.4, 149.5, 145.0, 141.3, 139.8, 135.6, 134.7, 129.7, 128.5, 128.3, 128.0, 127.4, 126.6, 126.1, 123.8, 121.0, 50.1, 47.9, 35.7, 29.9, 28.4, 21.6; IR (neat): 2923, 1729, 1598, 1456, 1360, 1170, 1131, 1090, 777, 672, 588; HRMS (ESI)  $m/z$ :  $[M + H]^+$  calcd for  $C_{27}H_{26}NO_3S$  444.1628, found 444.1627.

**4-methyl-2-tosyl-2,3,4,5-tetrahydro-1H-benzo[*e*]isoindol-1-one (5pa)**

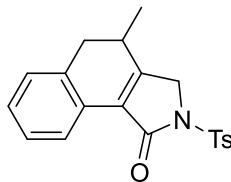

**5pa**

The reaction was conducted with *N*-(but-2-yn-1-yl)-4-methyl-*N*-(otolylethynyl) benzenesulfonamide (**4p**, 0.2 mmol, 67.4 mg), 3,5-dichloropyridine *N*-oxide (**2a**, 0.24 mmol, 39.4 mg), PPh<sub>3</sub>AuCl (0.01 mmol, 5.0 mg), AgNTf<sub>2</sub> (0.01 mmol, 3.9 mg), and NaBARF (0.02 mmol, 17.7 mg) in PhCF<sub>3</sub> (4.0 mL) at 60 °C (60 °C, heating mantle temperature). Purification by column chromatography on silica gel (petroleum ether/ethyl acetate = 10:1) yielded **5pa** (35.4 mg, 50%) as a pale yellow oil.

<sup>1</sup>H NMR (400 MHz, CDCl<sub>3</sub>) δ 8.09 – 8.00 (m, 3H), 7.34 (d, *J* = 6.0 Hz, 2H), 7.20 – 7.14 (m, 3H), 4.57 – 4.41 (m, 2H), 3.01 – 2.87 (m, 2H), 2.71 – 2.65 (m, 1H), 2.43 (s, 3H), 1.25 – 1.19 (m, 3H); <sup>13</sup>C NMR (100 MHz, CDCl<sub>3</sub>) δ 166.8, 158.7, 145.0, 135.6, 134.1, 129.7, 128.6, 128.1, 127.9, 127.4, 127.2, 127.0, 123.7, 50.1, 36.0, 29.4, 21.7, 17.2; IR (neat): 2926, 1721, 1597, 1453, 1362, 1170, 1114, 1090, 783, 671, 587; HRMS (ESI) *m/z*: [M + H]<sup>+</sup> calcd for C<sub>20</sub>H<sub>20</sub>NO<sub>3</sub>S 354.1158, found 354.1160.

### 3-(2,6-dimethylphenyl)-4-(1,2,3,4-tetrahydronaphthalen-1-yl)-1-tosyl-1,5-dihydro-2*H*-pyrrol-2-one (**5qa**)

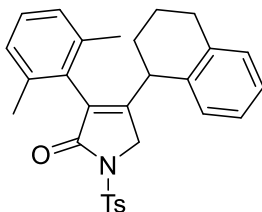

**5qa**

The reaction was conducted with *N*-((2,6-dimethylphenyl)ethynyl)-4-methyl-*N*-(6-phenylhex-2-yn-1-yl)benzenesulfonamide (**4q**, 0.2 mmol, 91.2 mg), 3,5-dichloropyridine *N*-oxide (**2a**, 0.24 mmol, 39.4 mg), PPh<sub>3</sub>AuCl (0.01 mmol, 5.0 mg), AgNTf<sub>2</sub> (0.01 mmol, 3.9 mg), and NaBARF (0.02 mmol, 17.7 mg) in PhCF<sub>3</sub> (4.0 mL) at 60 °C (60 °C, heating mantle temperature). Purification by column chromatography on silica gel (petroleum ether/ethyl acetate = 10:1) yielded **5qa** (59.6 mg, 65%) as a pale yellow oil.

<sup>1</sup>H NMR (400 MHz, CDCl<sub>3</sub>) δ 7.95 (d, *J* = 8.3 Hz, 2H), 7.33 – 7.29 (m, 4H), 7.19 – 7.10 (m, 3H), 7.04 – 6.99 (m, 2H), 5.85 – 5.77 (m, 1H), 4.63 (s, 2H), 2.80 – 2.77 (m, 2H), 2.62 – 2.57 (m, 2H), 2.43 (s, 3H), 2.07 – 1.99 (m, 2H), 1.91 (s, 6H), 0.96 – 0.83 (m, 1H); <sup>13</sup>C NMR (100 MHz, CDCl<sub>3</sub>) δ 167.3, 150.2, 145.0, 140.3, 139.7, 137.1, 135.5, 133.9, 129.6,

128.8, 128.6, 128.0, 127.4, 126.4, 121.0, 51.8, 35.3, 32.0, 21.7, 20.0; IR (neat): 2923, 1721, 1596, 1454, 1362, 1171, 1031, 1052, 775, 655, 585; HRMS (ESI) m/z: [M + H]<sup>+</sup> calcd for C<sub>29</sub>H<sub>30</sub>NO<sub>3</sub>S 472.1941, found 472.1944.

## Synthetic Applications

### *N*-(2-(4-phenyl-1*H*-pyrrole-3-carbonyl)phenyl)benzamide (**6**)

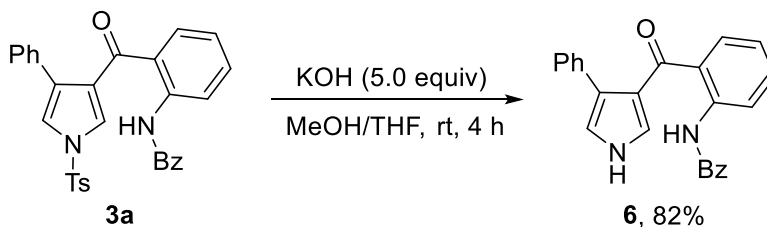

KOH (1.0 mmol, 56.0 mg) was added to a solution of compound **3a** (0.2 mmol, 73.2 mg) in MeOH/THF (2.0 ml/2.0 ml) at room temperature. The reaction mixture was stirred at 80 °C (80 °C, heating mantle temperature) and the progress of the reaction was monitored by TLC. Upon completion, the mixture was then concentrated and the residue was purified by chromatography on silica gel (eluent: petroleum ether/ethyl acetate) to afford the desired product **6** (60.0 mg, 82% yield, yellow oil). <sup>1</sup>H NMR (400 MHz, CDCl<sub>3</sub>) δ 11.74 (s, 1H), 8.91 (s, 1H), 8.71 (d, *J* = 6.7 Hz, 1H), 7.98 (d, *J* = 6.0 Hz, 2H), 7.80 (d, *J* = 6.9 Hz, 1H), 7.56 – 7.43 (m, 4H), 7.37 – 7.23 (m, 5H), 7.05 – 6.99 (m, 2H), 6.91 – 6.87 (m, 1H); <sup>13</sup>C NMR (100 MHz, CDCl<sub>3</sub>) δ 194.5, 166.2, 139.7, 134.4, 134.3, 133.4, 133.2, 132.0, 128.7, 128.3(2), 128.2(5), 127.5, 127.1, 126.9, 126.5, 126.3, 122.7, 122.4, 121.5, 118.8; IR (neat): 3278 (br), 2920, 1661, 1600, 1580, 1510, 1492, 1448, 1436, 1383, 1307, 1293, 756, 696; HRMS (ESI) *m/z*: [M + H]<sup>+</sup> calcd for C<sub>24</sub>H<sub>19</sub>N<sub>2</sub>O<sub>2</sub> 367.1441, found 367.1440.

### (2-(benzylamino)phenyl)(4-phenyl-1-tosyl-1*H*-pyrrol-3-yl)methanol (**7**)

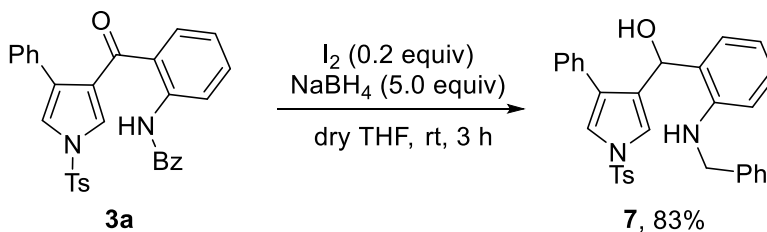

To a mixture of I<sub>2</sub> (0.04 mmol, 10.2 mg), and NaBH<sub>4</sub> (1.0 mmol, 38.0 mg) was added to a solution of the compound **3a** (0.2 mmol, 73.2 mg) in dry THF (4.0 mL) at room

temperature. The reaction mixture was stirred at room temperature and the progress of the reaction was monitored by TLC. Upon completion, the mixture was then concentrated and the residue was purified by chromatography on silica gel (eluent: petroleum ether/ethyl acetate) to afford the desired product **7** (84.5 mg, 83% yield, yellow oil). <sup>1</sup>H NMR (400 MHz, CDCl<sub>3</sub>) δ 7.74 (d, *J* = 8.1 Hz, 2H), 7.30 – 7.10 (m, 17H), 6.97 (d, *J* = 7.3 Hz, 1H), 6.60 (d, *J* = 7.9 Hz, 2H), 5.84 (s, 1H), 4.25 (s, 2H), 2.37 (s, 3H); <sup>13</sup>C NMR (100 MHz, CDCl<sub>3</sub>) δ 145.9, 145.2, 139.3, 135.8, 133.2, 130.0, 129.2, 129.1, 128.5, 128.3, 127.6, 127.3, 127.0(4), 126.9(9), 126.0, 120.0, 118.6, 116.8, 111.6, 68.2, 47.7, 21.6; IR (neat): 3527 (br), 3405 (br), 2923, 1603, 1584, 1518, 1452, 1371, 1318, 1188, 1172, 1090, 1067, 966, 671; HRMS (ESI) *m/z*: [M + H]<sup>+</sup> calcd for C<sub>31</sub>H<sub>29</sub>N<sub>2</sub>O<sub>3</sub>S 509.1893, found 509.1892.

***N*-((1-ethyl-3-(hydroxymethyl)-1*H*-inden-2-yl)methyl)-4-methylbenzenesulfonamide (8)**

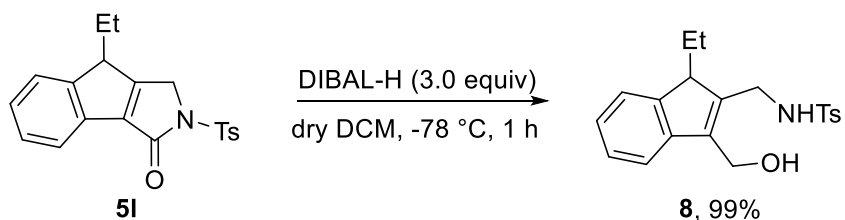

DIBAL-H (0.6 mmol, 0.6 mL, 1.0 M) was added dropwise to a solution of compound **5I** (0.2 mmol, 71.4 mg) in dry DCM (4.0 mL) at -78 °C. The reaction mixture was stirred at -78 °C and the progress of the reaction was monitored by TLC. Upon completion, the mixture was then concentrated and the residue was purified by chromatography on silica gel (eluent: petroleum ether/ethyl acetate) to afford the desired product **8** (70.7 mg, 99% yield, yellow oil). <sup>1</sup>H NMR (400 MHz, CDCl<sub>3</sub>) δ 7.72 (d, *J* = 8.3 Hz, 2H), 7.35 – 7.31 (m, 2H), 7.26 – 7.17 (m, 4H), 5.32 – 5.27 (m, 1H), 4.63 – 4.54 (m, 2H), 4.10 – 4.06 (m, 1H), 3.81 – 3.75 (m, 1H), 3.33 (t, *J* = 5.0 Hz, 1H), 2.39 (s, 3H), 2.01 – 1.95 (m, 1H), 1.74 – 1.67 (m, 2H), 0.50 (t, *J* = 7.4 Hz, 3H); <sup>13</sup>C NMR (100 MHz, CDCl<sub>3</sub>) δ 146.3, 143.5, 143.3, 142.0, 140.0, 136.7, 129.7, 127.1, 126.5, 125.4, 123.0, 119.4, 56.3, 50.5, 39.0, 22.2, 21.5, 8.7; IR (neat): 3480 (br), 3276 (br), 2927, 1721, 1598, 1459, 1324, 1289, 1158, 1093, 814, 661, 550; HRMS (ESI) *m/z*: [M + Na]<sup>+</sup> calcd for C<sub>20</sub>H<sub>23</sub>NNaO<sub>3</sub>S 380.1291, found 380.1292.



**methyl 1-ethyl-2-(((4-methylphenyl)sulfonamido)methyl)-1H-indene-3-carboxylate (9)**

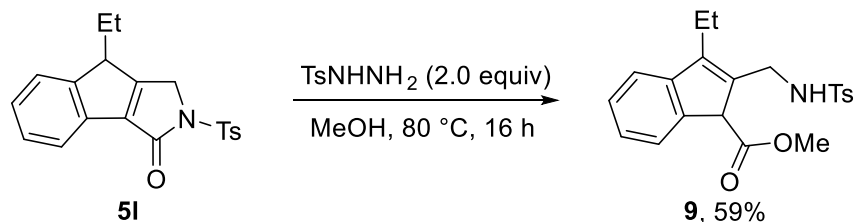

TsNHNH<sub>2</sub> (0.4 mmol, 74.4 mg) was added dropwise to a solution of compound **5I** (0.2 mmol, 71.4 mg) in MeOH (4.0 mL) at room temperature. The reaction mixture was stirred at 80 °C and the progress of the reaction was monitored by TLC. Upon completion, the mixture was then concentrated and the residue was purified by chromatography on silica gel (eluent: petroleum ether/ethyl acetate) to afford the desired product **9** (45.4 mg, 59% yield) as a yellow solid (mp 141-143 °C). <sup>1</sup>H NMR (400 MHz, CDCl<sub>3</sub>) δ 7.75 (d, *J* = 7.8 Hz, 2H), 7.49 (d, *J* = 7.4 Hz, 1H), 7.34 – 7.26 (m, 4H), 7.20 (t, *J* = 7.3 Hz, 1H), 5.12 – 5.09 (m, 1H), 4.22 (s, 1H), 4.08 – 4.03 (m, 1H), 3.96 – 3.89 (m, 1H), 3.70 (s, 3H), 2.52 (q, *J* = 7.6 Hz, 2H), 2.40 (s, 3H), 1.14 (t, *J* = 7.6 Hz, 3H); <sup>13</sup>C NMR (100 MHz, CDCl<sub>3</sub>) δ 171.4, 146.6, 144.2, 143.4, 140.1, 136.8, 132.5, 129.6, 127.7, 127.2, 125.8, 123.9, 119.7, 55.4, 52.6, 39.9, 21.5, 18.6, 13.4; IR (neat): 3285 (br), 2922, 1731, 1598, 1434, 1326, 1160, 1092, 1062, 814, 734, 662; HRMS (ESI) *m/z*: [M + H]<sup>+</sup> calcd for C<sub>21</sub>H<sub>24</sub>NO<sub>4</sub>S 386.1421, found 386.1422.

## Reference

- (1) G. Evindar, R. A. Batey, *J. Org. Chem.* 2006, **71**, 1802-1808.
- (2) W.-B. Shen, X.-T. Tang, T.-T. Zhang, S.-Y. Liu, J.-M. He, T.-F. Su, *Org. Lett.* 2020, **22**, 6799-6804.
- (3) E. Benedetti, A. Simonneau, A. Hours, H. Amouri, A. Penoni, G. Palmisano, M. Malacria, J.-P. Goddard, L. Fensterbank, *Adv. Synth. & Catal.* 2011, **353**, 1908-1912.

***N*-2-(1-(methylsulfonyl)-4-phenyl-1*H*-pyrrole-3-carbonyl)phenylbenzamide (3d).**

CCDC Number = 2049243

Crystal of **3d** was grown by slow evaporation of hexane/ethyl acetate solution of **3d** at room temperature (25 °C). X-ray diffraction data was collected at 293 K on a Rigaku Gemini E diffractometer with graded-multilayer focused CuK(alpha) X-rays.

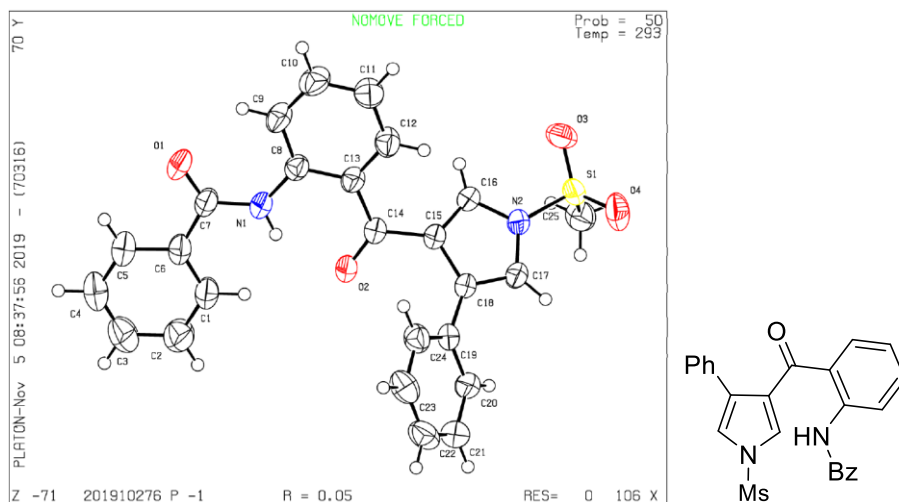

**Figure S1.** Crystal structure of **3d** with thermal ellipsoids at 50% probability

---

|                                         |                       |                    |                  |
|-----------------------------------------|-----------------------|--------------------|------------------|
| Bond precision:                         | C-C = 0.0040 A        | Wavelength=1.54184 |                  |
| Cell:                                   | a=8.9146 (9)          | b=11.2178 (9)      | c=11.8266 (7)    |
|                                         | alpha=79.648 (6)      | beta=70.259 (8)    | gamma=85.201 (7) |
| Temperature:                            | 293 K                 |                    |                  |
|                                         | Calculated            | Reported           |                  |
| Volume                                  | 1094.72 (17)          | 1094.72 (16)       |                  |
| Space group                             | P -1                  | P -1               |                  |
| Hall group                              | -P 1                  | -P 1               |                  |
| Moiety formula                          | C25 H20 N2 O4 S       | C25 H20 N2 O4 S    |                  |
| Sum formula                             | C25 H20 N2 O4 S       | C25 H20 N2 O4 S    |                  |
| Mr                                      | 444.49                | 444.49             |                  |
| Dx, g cm-3                              | 1.349                 | 1.348              |                  |
| Z                                       | 2                     | 2                  |                  |
| Mu (mm-1)                               | 1.606                 | 1.606              |                  |
| F000                                    | 464.0                 | 464.0              |                  |
| F000'                                   | 466.02                |                    |                  |
| h, k, lmax                              | 10, 13, 14            | 10, 13, 14         |                  |
| Nref                                    | 3917                  | 3915               |                  |
| Tmin, Tmax                              | 0.825, 0.865          | 0.897, 1.000       |                  |
| Tmin'                                   | 0.786                 |                    |                  |
| Correction method= # Reported T Limits: | Tmin=0.897 Tmax=1.000 |                    |                  |
| AbsCorr = MULTI-SCAN                    |                       |                    |                  |
| Data completeness=                      | 0.999                 | Theta(max)=        | 67.071           |
| R(reflections)=                         | 0.0473 ( 2885)        | wR2(reflections)=  | 0.1299 ( 3915)   |
| S =                                     | 1.008                 | Npar=              | 290              |

---

**8-methyl-2-tosyl-1,8-dihydroindeno[1,2-*c*]pyrrol-3(2*H*)-one (5a). CCDC Number = 2086108**

Crystal of **5a** was grown by slow evaporation of hexane/dichloromethane solution of **5a** at room temperature (25 °C). X-ray diffraction data was collected at 293 K on a Rigaku Gemini E diffractometer with graded-multilayer focused CuK(alpha) X-rays.

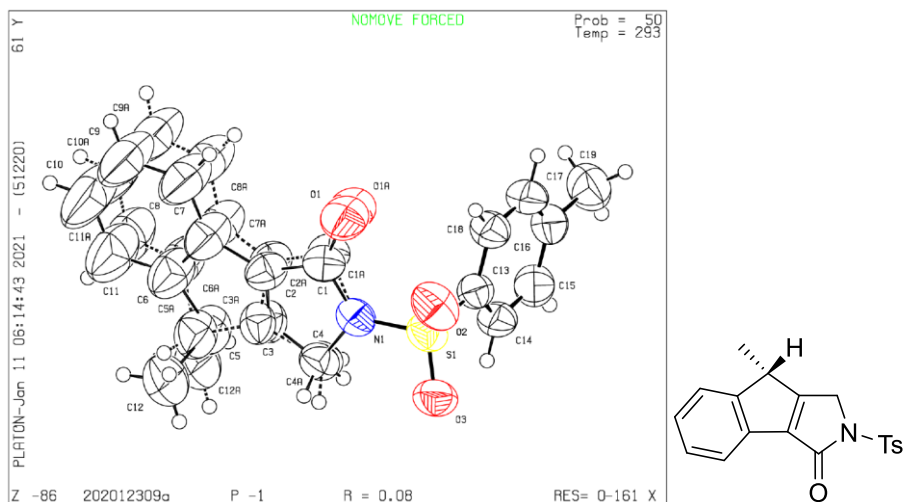

**Figure S2.** Crystal structure of **5a** with thermal ellipsoids at 50% probability

---

|                        |                                          |                                  |                  |
|------------------------|------------------------------------------|----------------------------------|------------------|
| Bond precision:        | C-C = 0.0053 Å                           | Wavelength=1.54184               |                  |
| Cell:                  | a=6.0727 (4)                             | b=12.1141 (8)                    | c=12.8850 (7)    |
|                        | alpha=86.689 (5)                         | beta=84.600 (5)                  | gamma=79.238 (6) |
| Temperature:           | 293 K                                    |                                  |                  |
|                        | Calculated                               | Reported                         |                  |
| Volume                 | 926.30 (10)                              | 926.29 (10)                      |                  |
| Space group            | P -1                                     | P -1                             |                  |
| Hall group             | -P 1                                     | -P 1                             |                  |
| Moiety formula         | C19 H17 N O3 S [+ solvent]               | C19 H17 N O3 S                   |                  |
| Sum formula            | C19 H17 N O3 S [+ solvent]               | C19 H17 N O3 S                   |                  |
| Mr                     | 339.40                                   | 339.39                           |                  |
| Dx, g cm <sup>-3</sup> | 1.217                                    | 1.217                            |                  |
| Z                      | 2                                        | 2                                |                  |
| Mu (mm <sup>-1</sup> ) | 1.679                                    | 1.679                            |                  |
| F000                   | 356.0                                    | 356.0                            |                  |
| F000'                  | 357.67                                   |                                  |                  |
| h, k, lmax             | 7, 14, 15                                | 7, 14, 15                        |                  |
| Nref                   | 3321                                     | 3305                             |                  |
| Tmin, Tmax             | 0.785, 0.845                             | 0.908, 1.000                     |                  |
| Tmin'                  | 0.764                                    |                                  |                  |
| Correction method= #   | Reported T Limits: Tmin=0.908 Tmax=1.000 |                                  |                  |
| AbsCorr =              | MULTI-SCAN                               |                                  |                  |
| Data completeness=     | 0.995                                    | Theta(max) = 67.031              |                  |
| R(reflections)=        | 0.0754 ( 2536)                           | wR2(reflections)= 0.2533 ( 3305) |                  |
| S =                    | 1.056                                    | Npar= 236                        |                  |

---

**methyl 1-ethyl-2-(((4-methylphenyl)sulfonamido)methyl)-1*H*-indene-3-carboxylate (9). CCDC Number = 2086109**

Crystal of **9** was grown by slow evaporation of hexane/dichloromethane solution of **9** at room temperature (25 °C). X-ray diffraction data was collected at 293 K on a Rigaku Gemini E diffractometer with graded-multilayer focused CuK(alpha) X-rays.

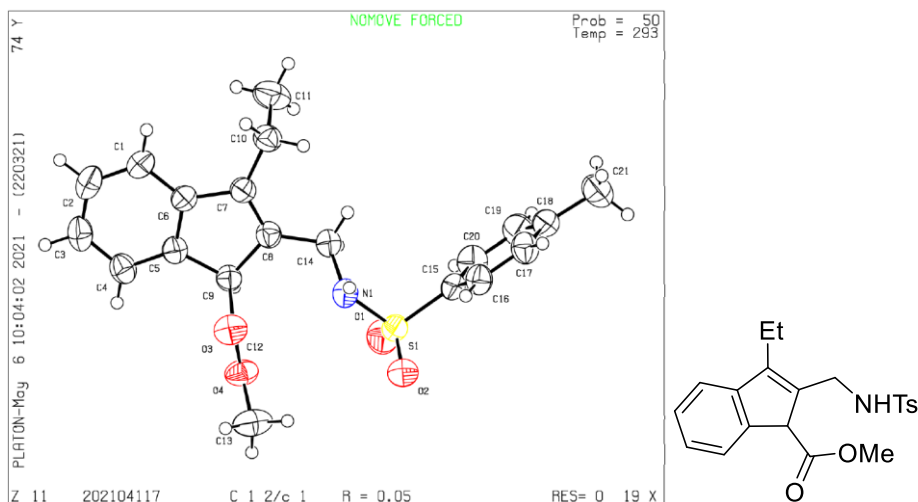

**Figure S3.** Crystal structure of **9** with thermal ellipsoids at 50% probability

---

|                                                               |                |                                 |              |
|---------------------------------------------------------------|----------------|---------------------------------|--------------|
| Bond precision:                                               | C-C = 0.0034 Å | Wavelength=1.54184              |              |
| Cell:                                                         | a=17.8847(4)   | b=9.00834(19)                   | c=25.4932(6) |
|                                                               | alpha=90       | beta=106.905(2)                 | gamma=90     |
| Temperature:                                                  | 293 K          |                                 |              |
|                                                               | Calculated     | Reported                        |              |
| Volume                                                        | 3929.77(16)    | 3929.75(15)                     |              |
| Space group                                                   | C 2/c          | C 1 2/c 1                       |              |
| Hall group                                                    | -C 2yc         | -C 2yc                          |              |
| Moiety formula                                                | C21 H23 N O4 S | C21 H23 N O4 S                  |              |
| Sum formula                                                   | C21 H23 N O4 S | C21 H23 N O4 S                  |              |
| Mr                                                            | 385.46         | 385.46                          |              |
| Dx, g cm <sup>-3</sup>                                        | 1.303          | 1.303                           |              |
| Z                                                             | 8              | 8                               |              |
| Mu (mm <sup>-1</sup> )                                        | 1.682          | 1.682                           |              |
| F000                                                          | 1632.0         | 1632.0                          |              |
| F000'                                                         | 1639.34        |                                 |              |
| h, k, lmax                                                    | 21, 11, 31     | 21, 10, 31                      |              |
| Nref                                                          | 3777           | 3716                            |              |
| Tmin, Tmax                                                    | 0.817, 0.889   | 0.966, 1.000                    |              |
| Tmin'                                                         | 0.790          |                                 |              |
| Correction method= # Reported T Limits: Tmin=0.966 Tmax=1.000 |                |                                 |              |
| AbsCorr = MULTI-SCAN                                          |                |                                 |              |
| Data completeness=                                            | 0.984          | Theta(max) = 70.708             |              |
| R(reflections)=                                               | 0.0490( 3116)  | wR2(reflections)= 0.1477( 3716) |              |
| S =                                                           | 1.036          | Npar= 251                       |              |

---

11.852

8.818  
8.797  
7.984  
7.964  
7.841  
7.821  
7.785  
7.766  
7.609  
7.590  
7.569  
7.520  
7.504  
7.483  
7.461  
7.443  
7.423  
7.352  
7.332  
7.301  
7.296  
7.274  
7.256  
7.243  
7.073  
7.054  
7.035

2.422

0.000

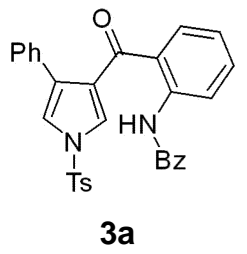

<sup>1</sup>H NMR (400 MHz, CDCl<sub>3</sub>) spectra of **3a**

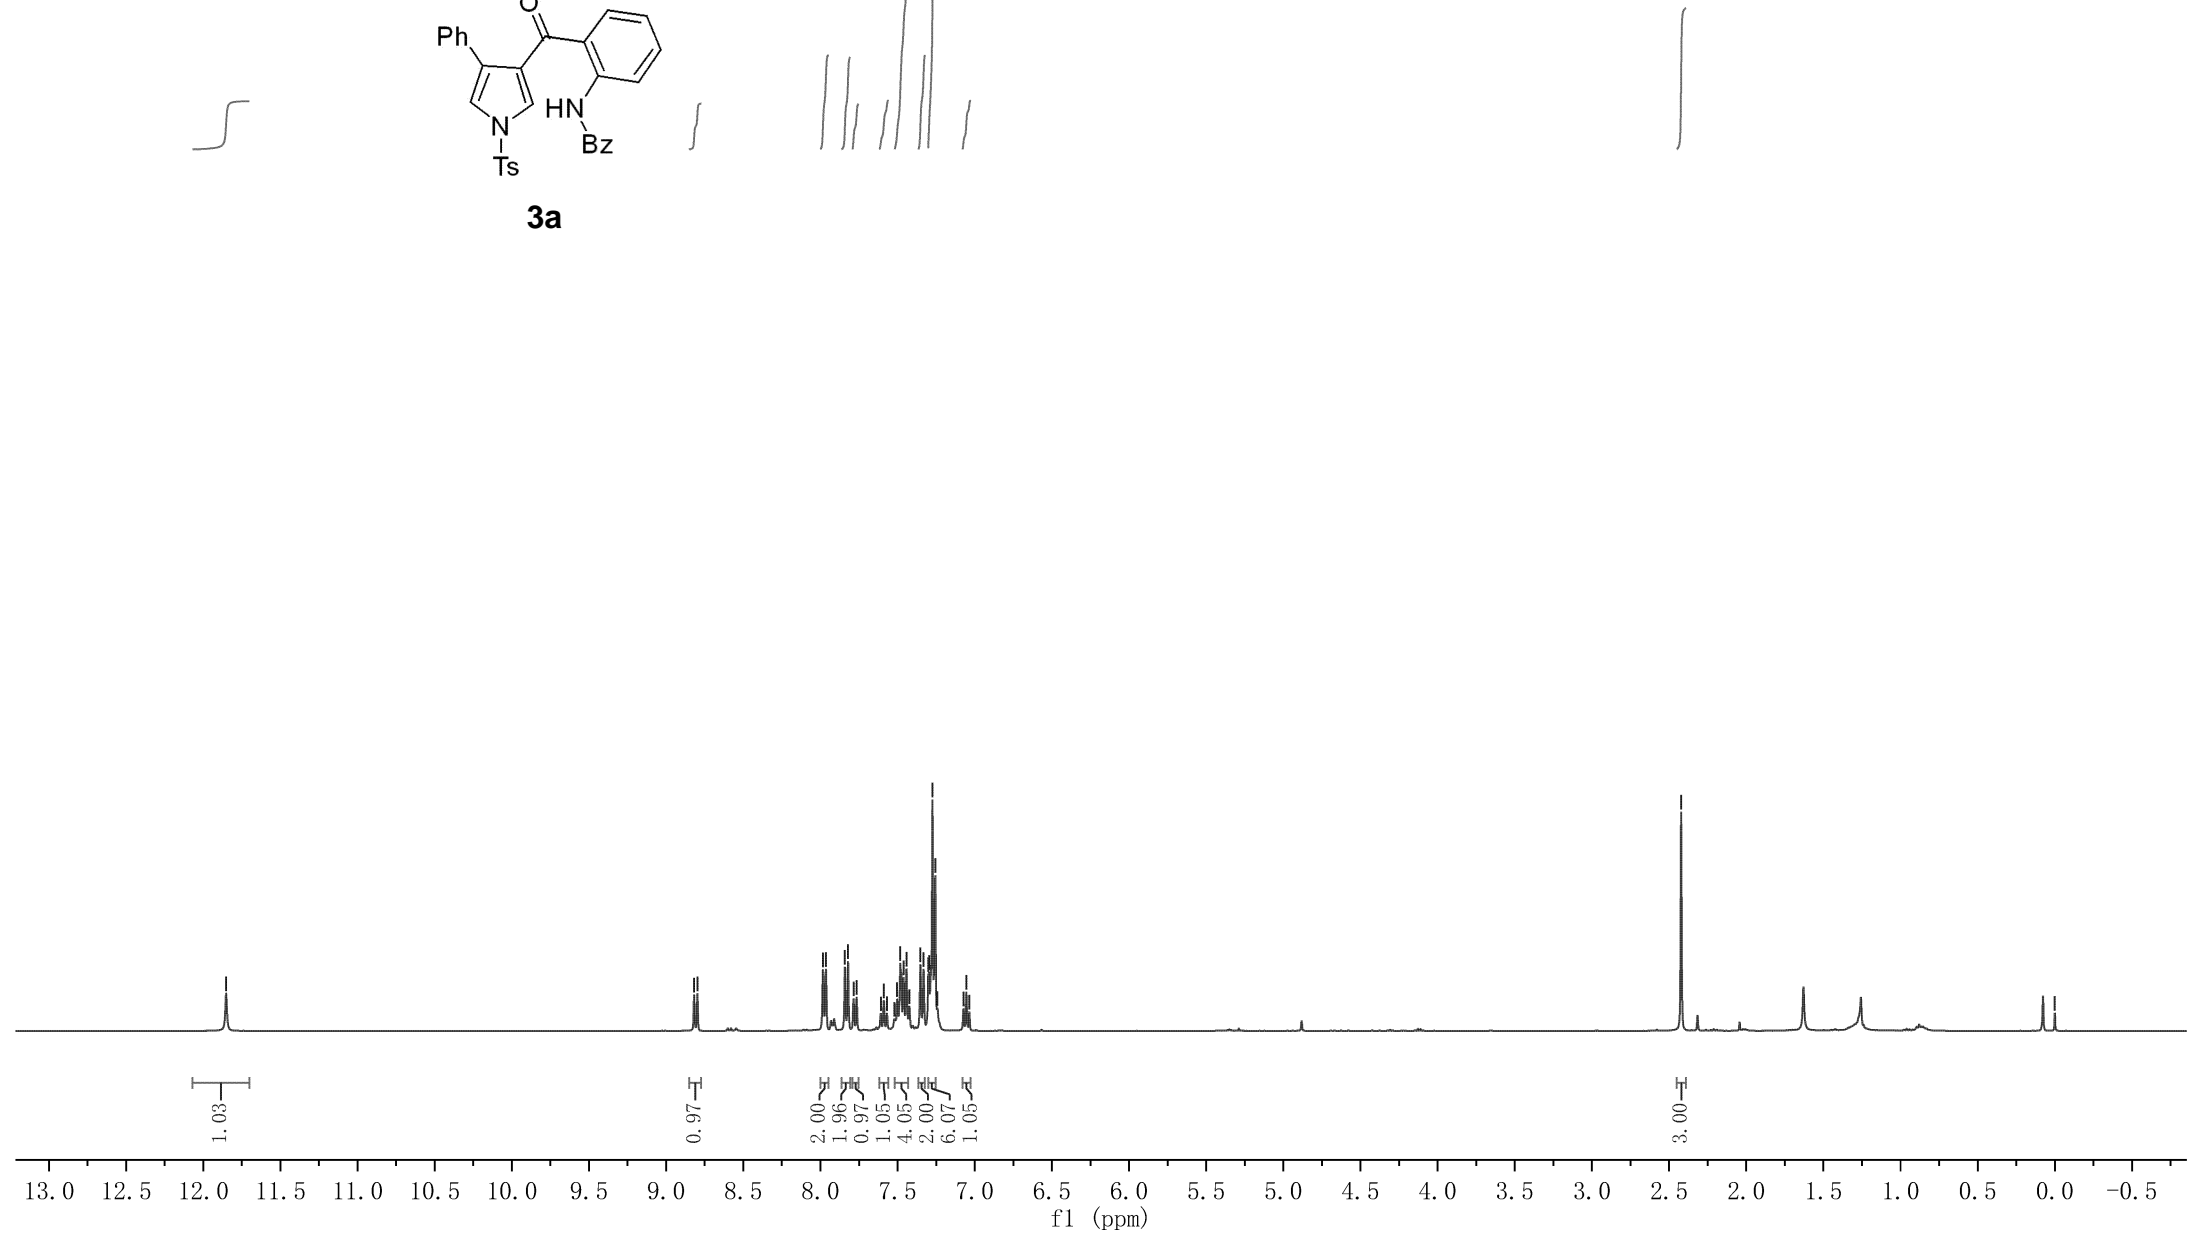

194.32

165.97

146.15

140.70

134.84

134.80

134.47

133.53

132.18

131.95

130.40

129.98

128.72

128.48

128.11

127.49

127.41

127.38

126.60

126.17

124.21

122.44

121.23

119.08

77.32

77.00

76.68

21.69

<sup>13</sup>C NMR (100 MHz, CDCl<sub>3</sub>) spectra of **3a**

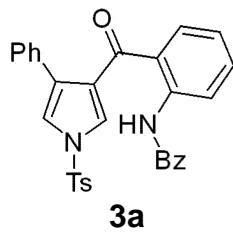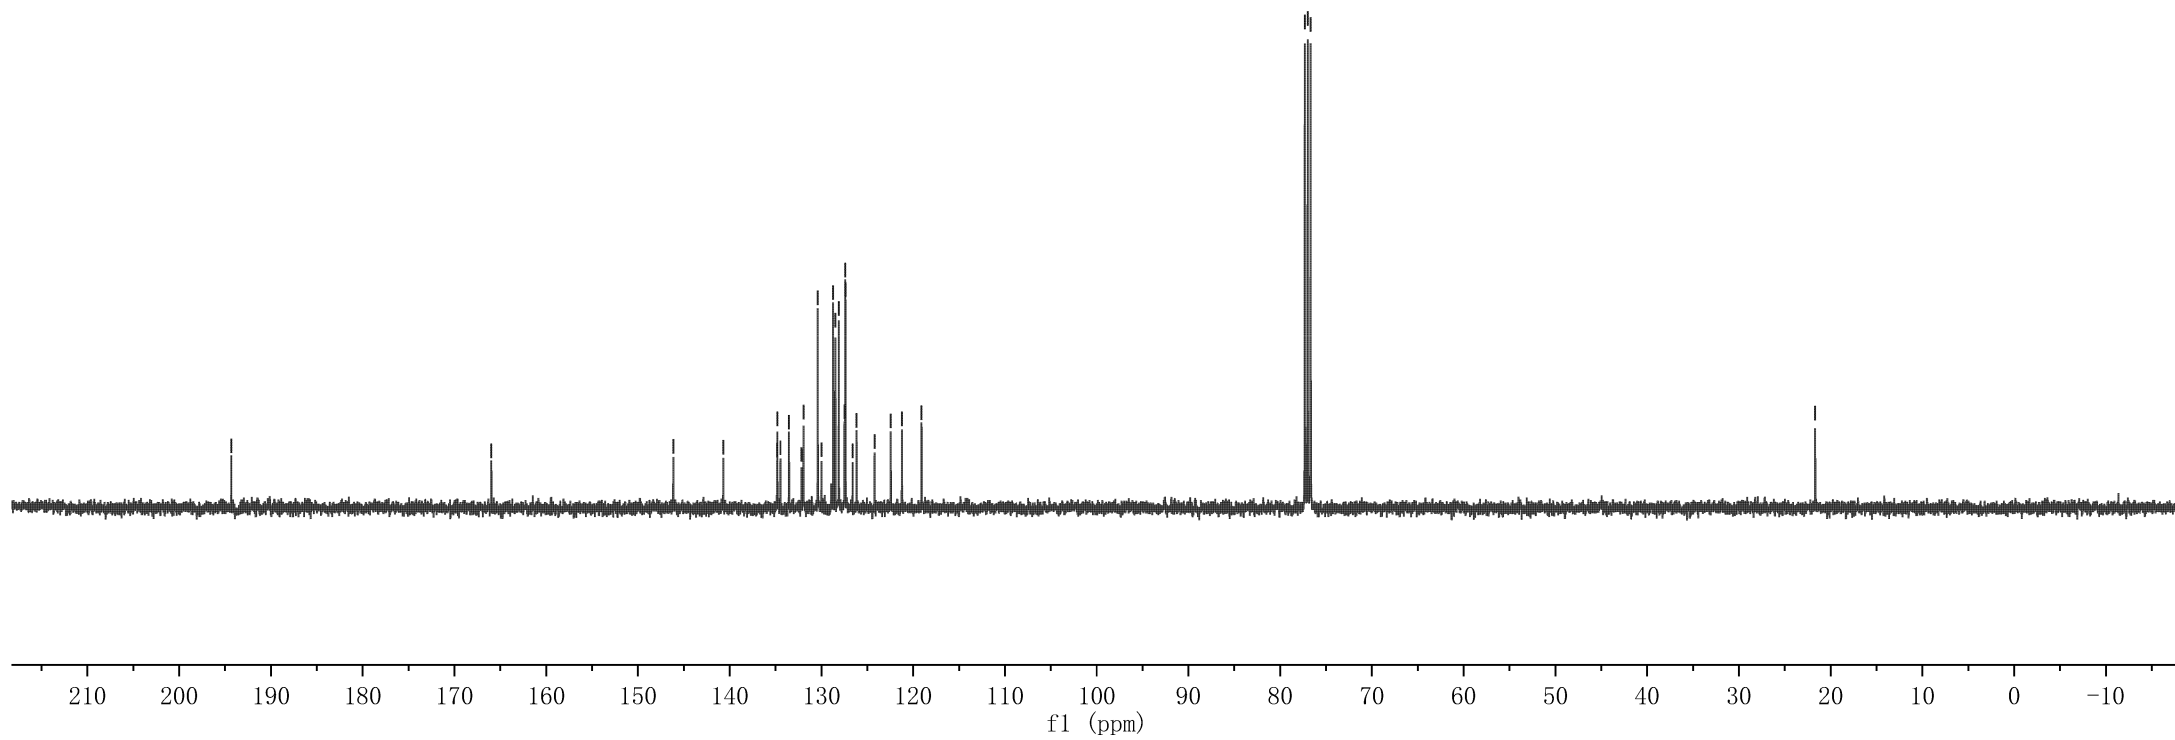

11.334

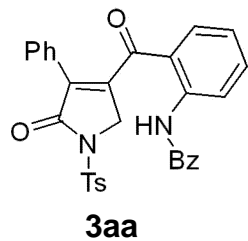

8.049  
8.031

7.213  
7.199  
7.152

6.679  
6.661  
6.482  
6.426  
6.333  
6.319  
5.981  
5.965

3.934

1.565

0.000

<sup>1</sup>H NMR (400 MHz, CDCl<sub>3</sub>) spectra of **3aa**

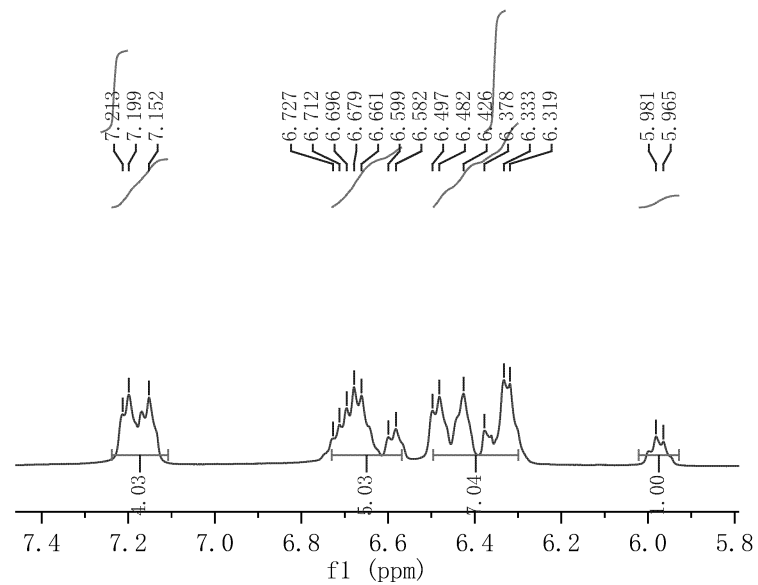

1.04

1.01

4.03

5.03

7.04

1.00

2.01

3.00

12.5 12.0 11.5 11.0 10.5 10.0 9.5 9.0 8.5 8.0 7.5 7.0 6.5 6.0 5.5 5.0 4.5 4.0 3.5 3.0 2.5 2.0 1.5 1.0 0.5 0.0 -0.5

f1 (ppm)

196.27

166.24  
166.05

147.64  
145.73  
142.23

132.40  
129.93  
128.96  
128.89  
128.62  
128.36  
127.48  
122.68  
120.83  
119.69

77.32  
77.00  
76.68

50.68

21.73

### <sup>13</sup>C NMR (100 MHz, CDCl<sub>3</sub>) spectra of **3aa**

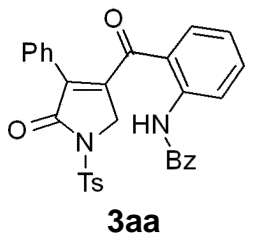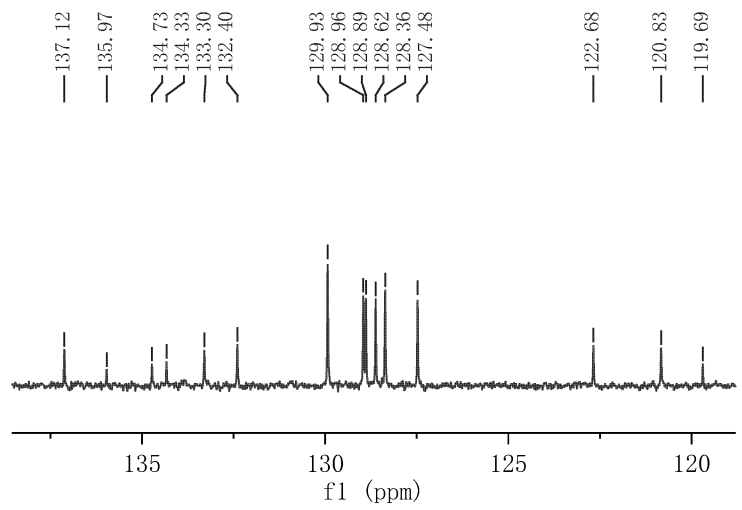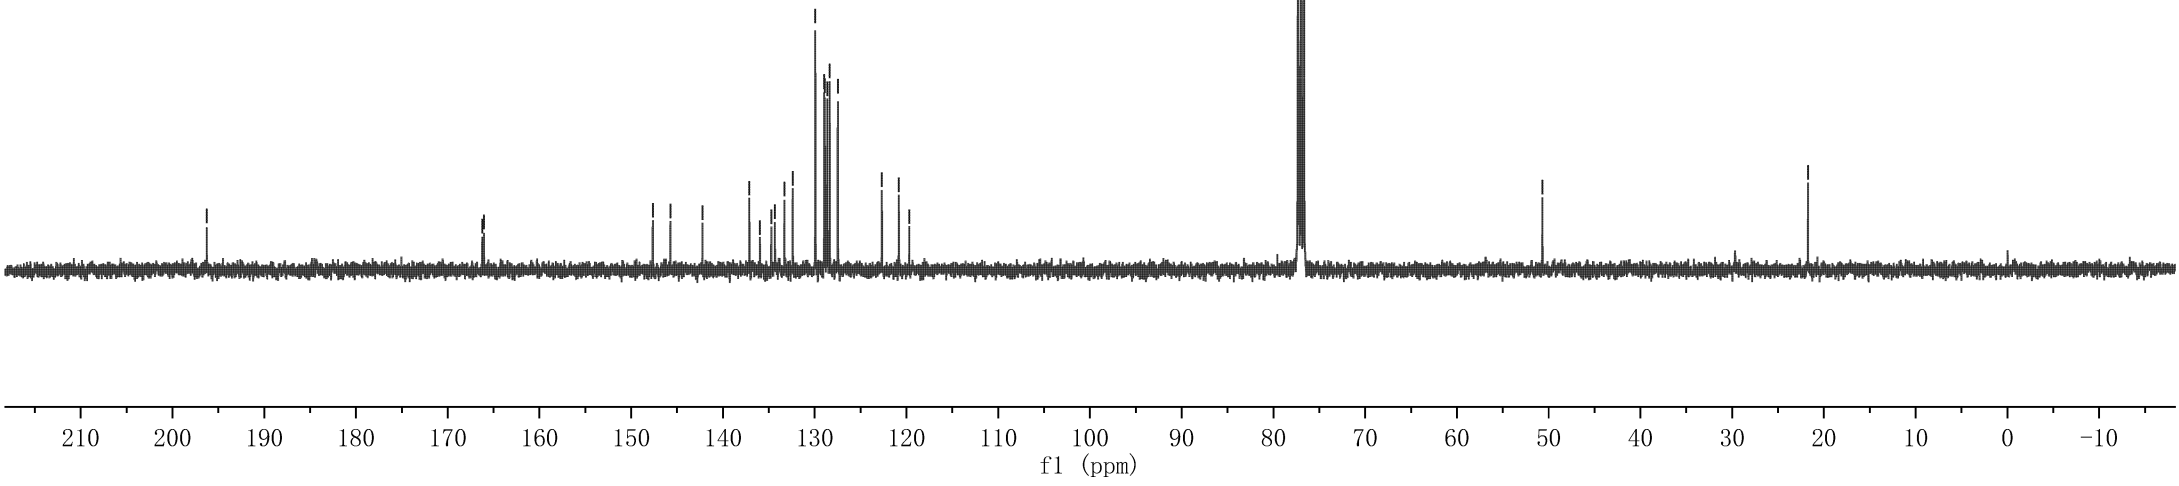



11.865

8.829  
8.808  
8.034  
7.965  
7.946  
7.784  
7.764  
7.664  
7.646  
7.582  
7.562  
7.498  
7.455  
7.438  
7.419  
7.323  
7.315  
7.277  
7.254  
7.245  
7.072  
7.053  
7.034

0.000

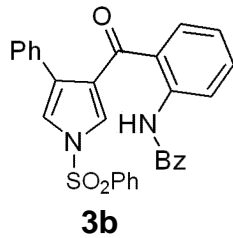

<sup>1</sup>H NMR (400 MHz, CDCl<sub>3</sub>) spectra of **3b**

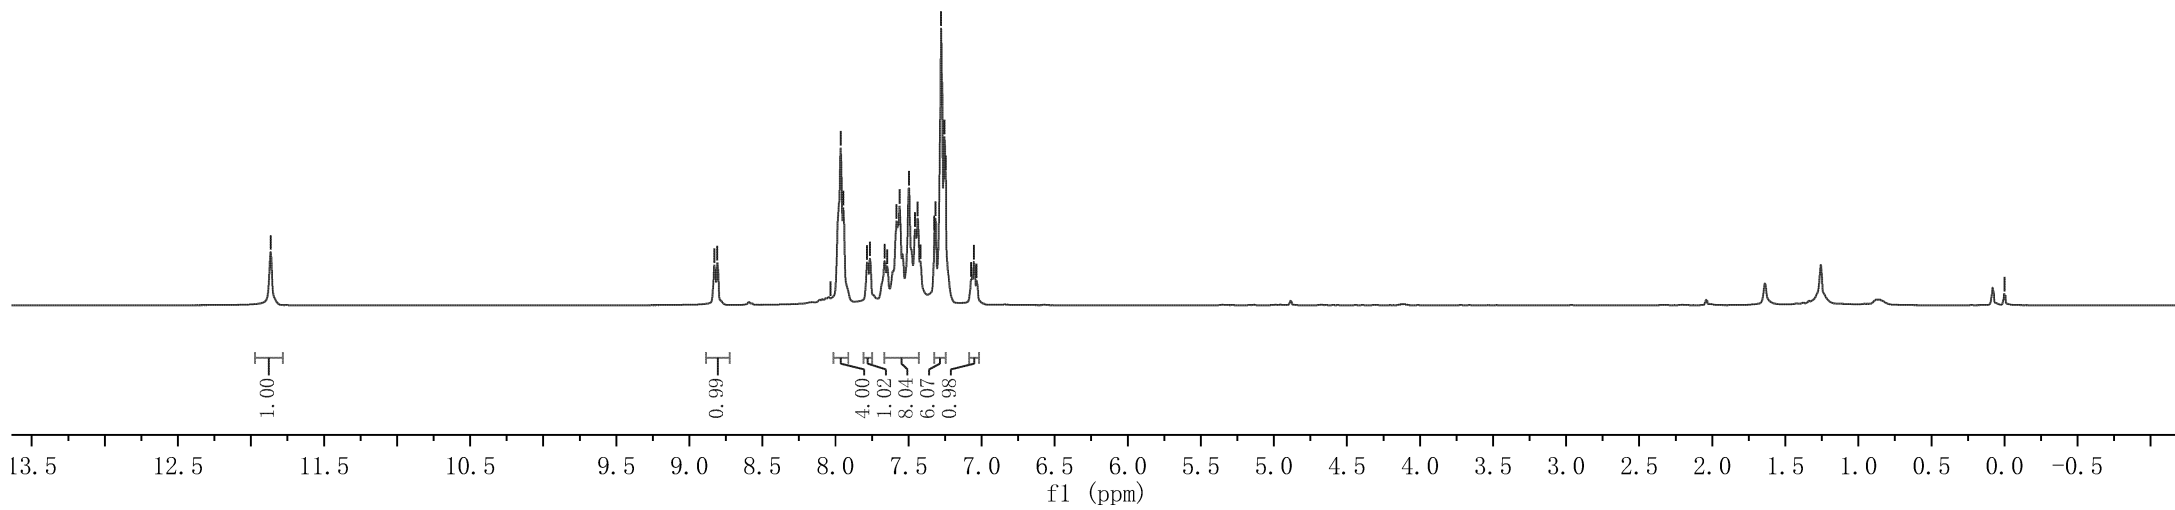

— 194.31

— 165.96

140.75  
137.85  
134.86  
134.72  
134.44  
133.55  
132.06  
131.95  
130.13  
129.80  
128.71  
128.49  
128.09  
127.54  
127.29  
126.78  
126.09  
124.10  
122.43  
121.21  
119.08

77.32  
77.00  
76.68

<sup>13</sup>C NMR (100 MHz, CDCl<sub>3</sub>) spectra of **3b**

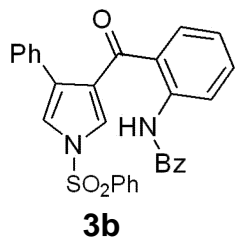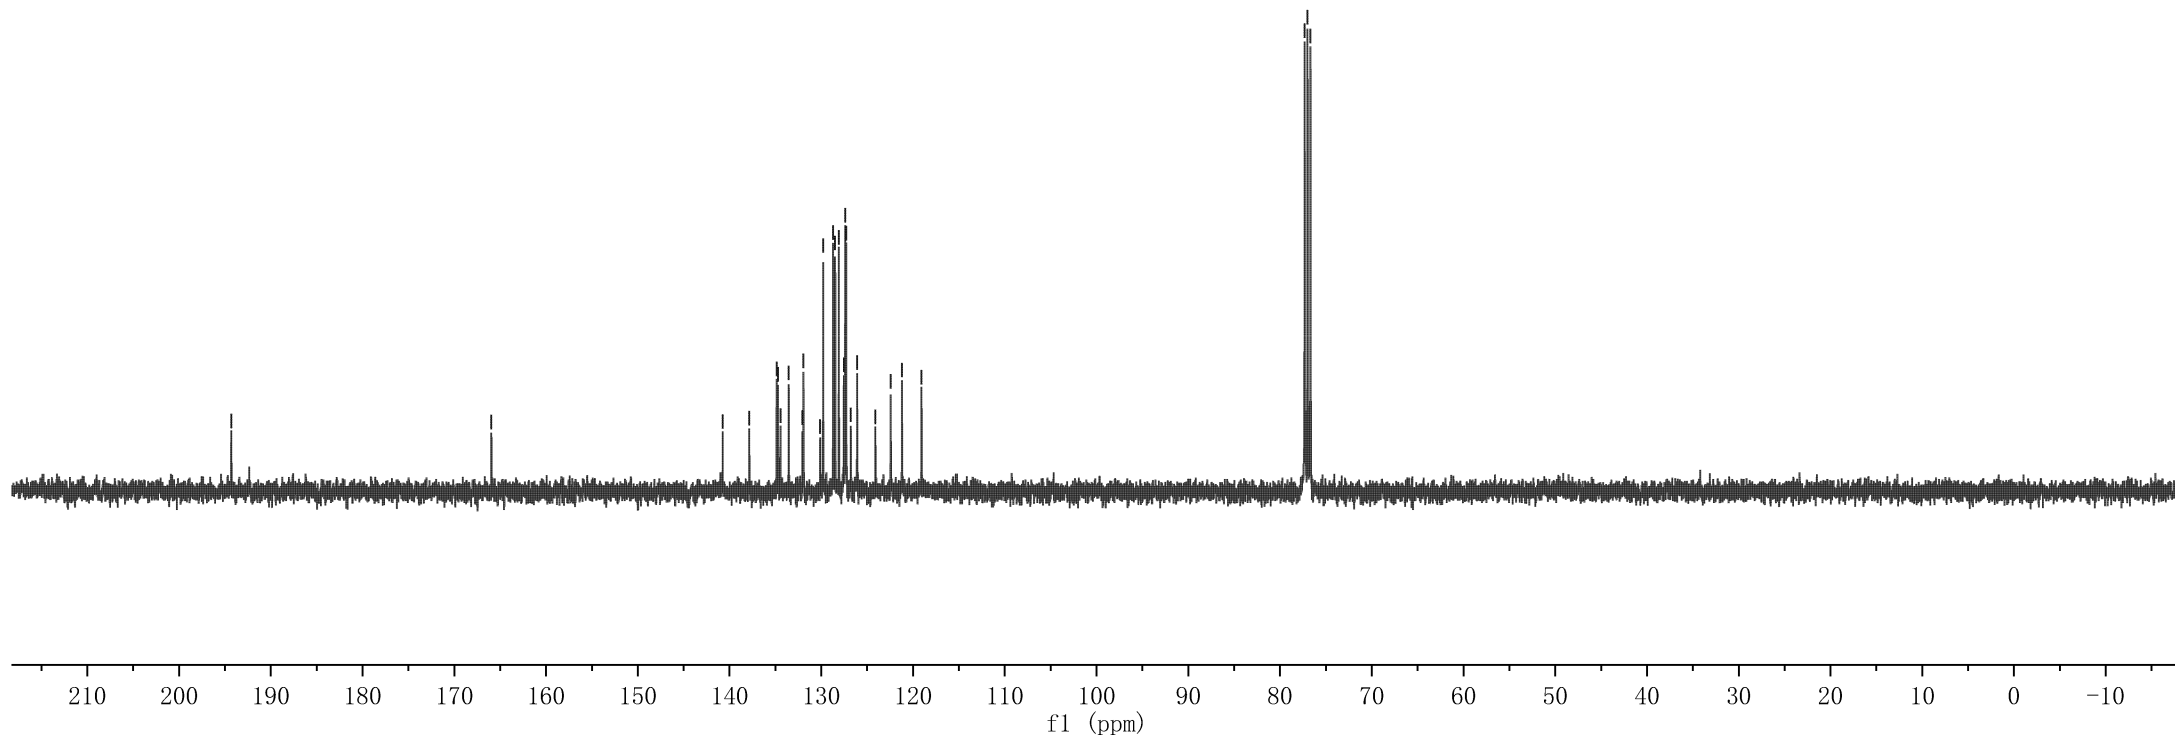

11.845

0.000

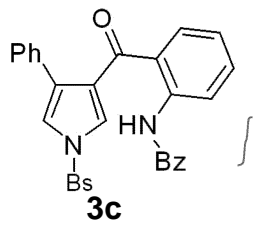

<sup>1</sup>H NMR (400 MHz, CDCl<sub>3</sub>) spectra of **3c**

8.823  
8.802  
7.989  
7.970  
7.816  
7.799  
7.761  
7.741  
7.708  
7.690  
7.612  
7.592  
7.573  
7.531  
7.512  
7.495  
7.473  
7.452  
7.433  
7.289  
7.275  
7.256  
7.069  
7.050  
7.031

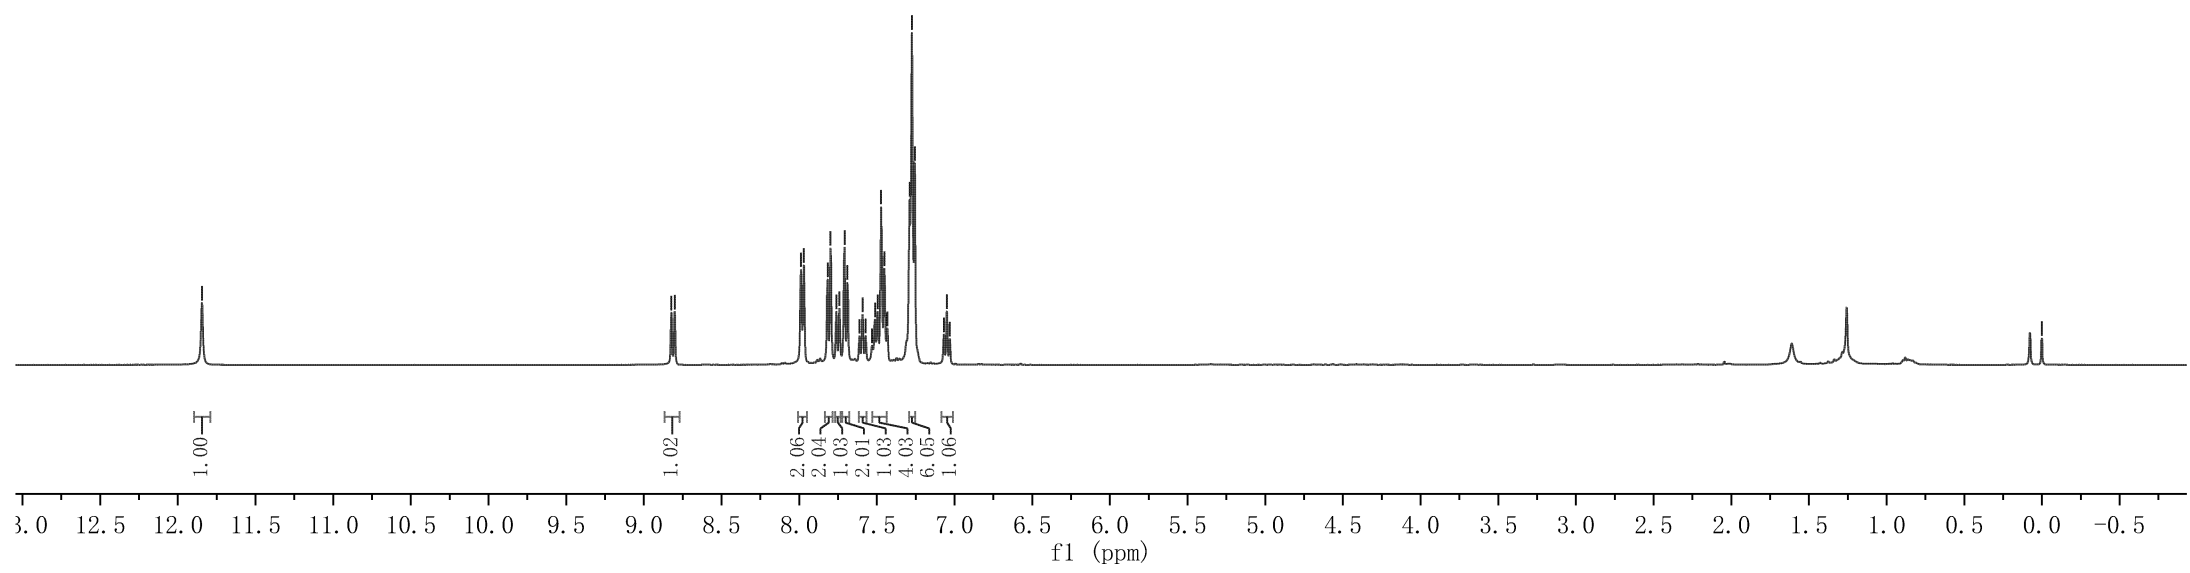

194.18

165.98

140.76  
136.78  
134.94  
134.43  
133.49  
133.18  
132.00  
131.91  
130.49  
130.29  
128.75  
128.72  
128.53  
128.11  
127.67  
127.41  
127.17  
125.92  
124.07  
122.45  
121.28  
118.92

77.32  
77.00  
76.68

<sup>13</sup>C NMR (100 MHz, CDCl<sub>3</sub>) spectra of **3c**

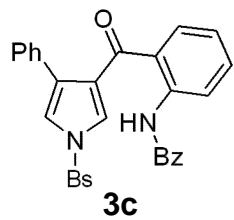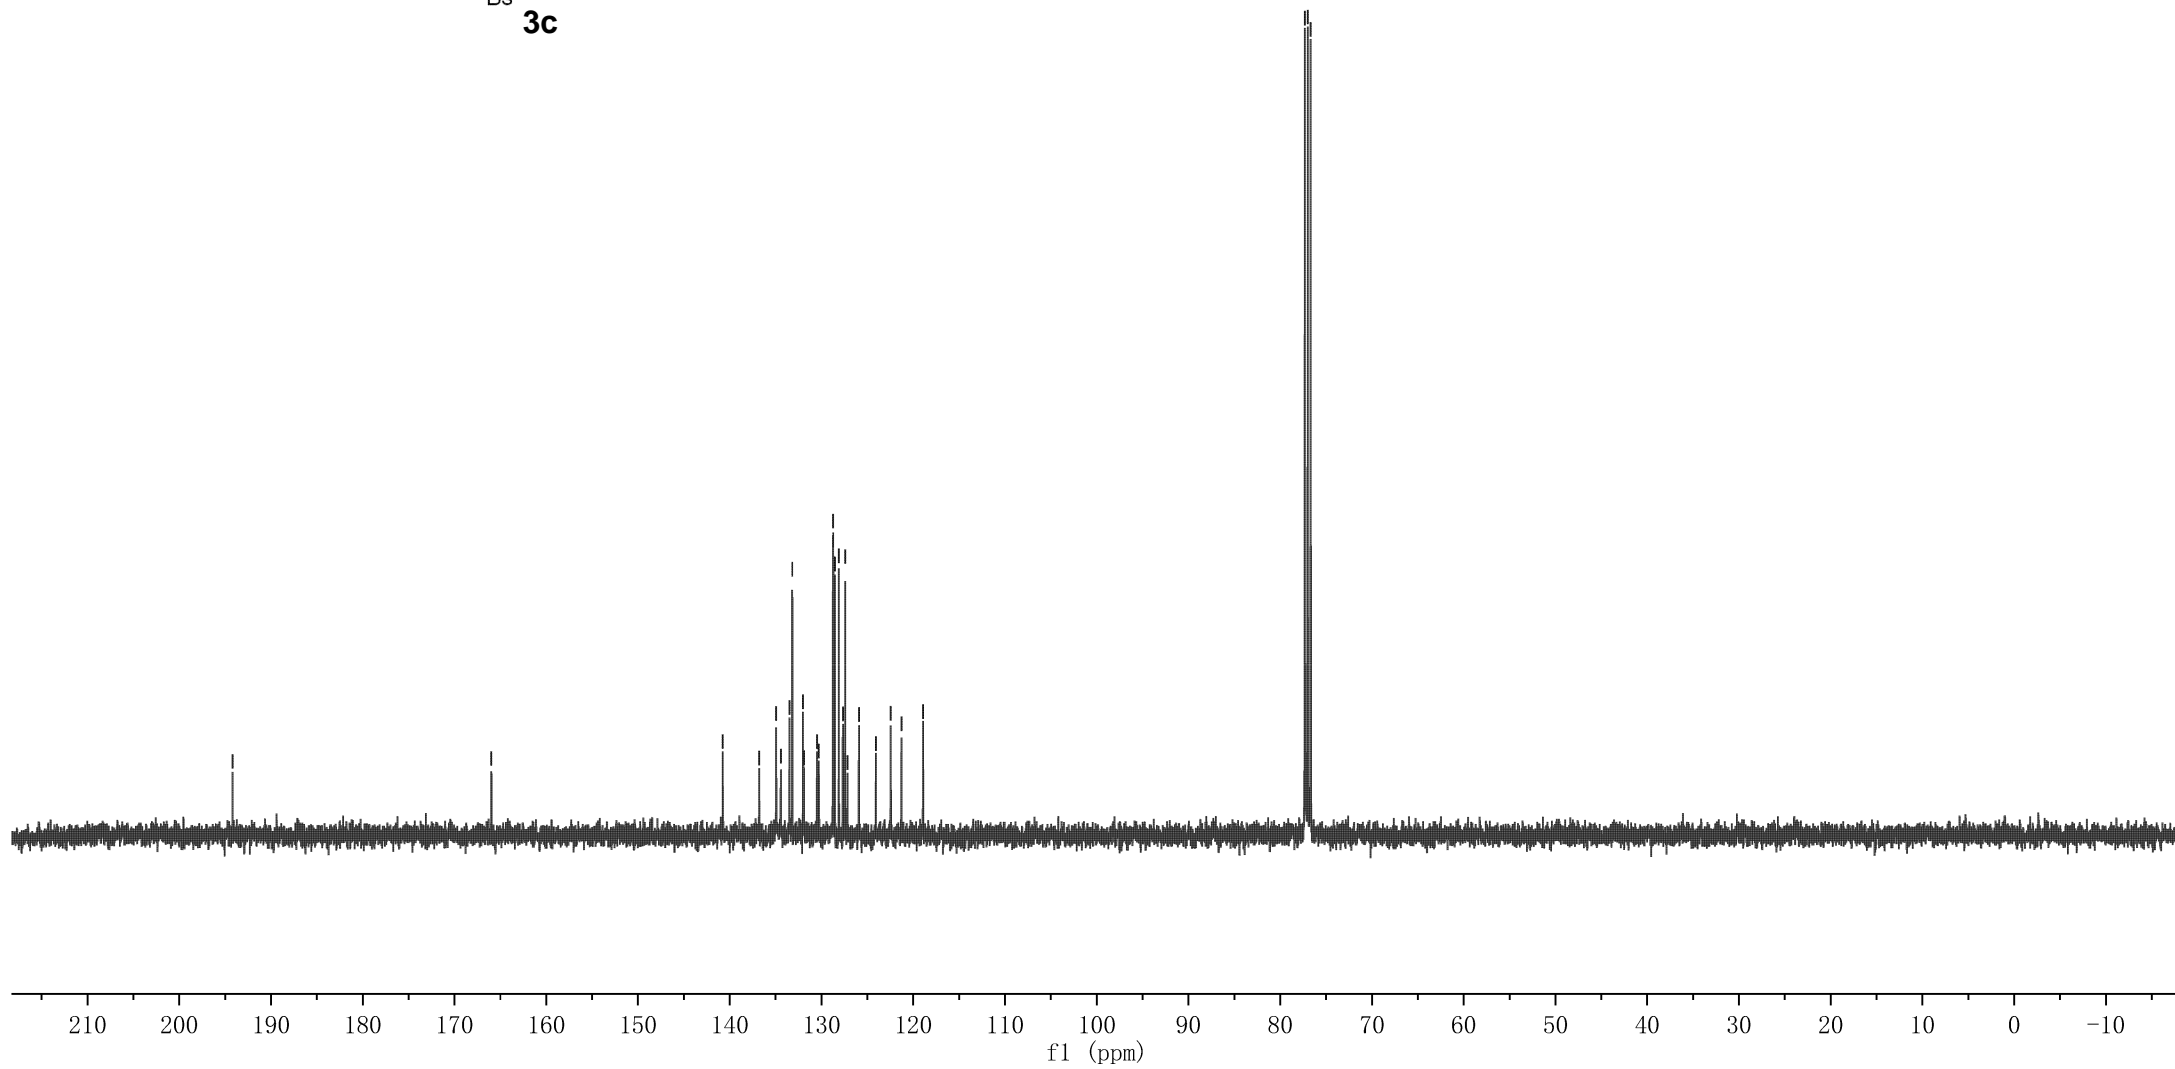

11.929

8.851  
8.830  
8.022  
8.004  
7.797  
7.778  
7.599  
7.580  
7.561  
7.526  
7.509  
7.476  
7.453  
7.315  
7.305  
7.265  
7.254  
7.053  
7.034  
7.015

3.283

0.000

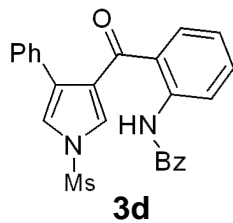

<sup>1</sup>H NMR (400 MHz, CDCl<sub>3</sub>) spectra of **3d**

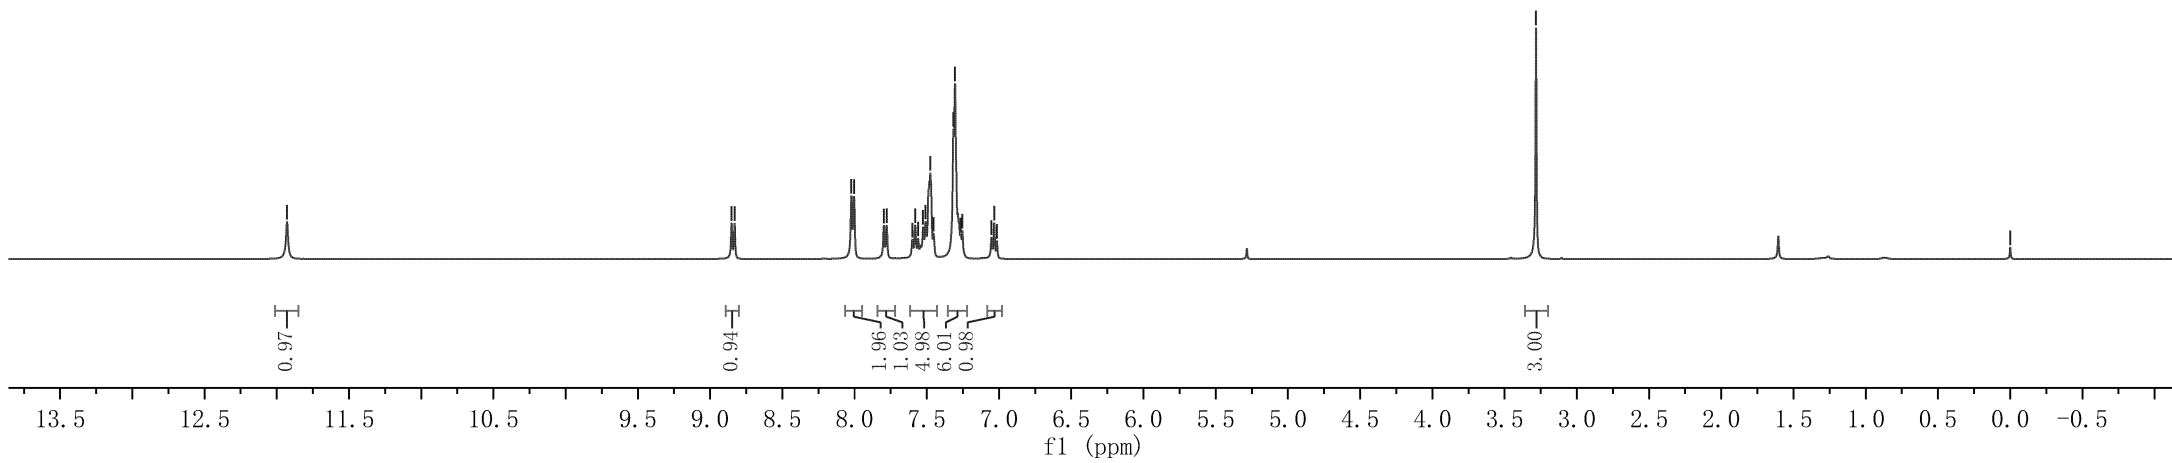

—194.46

—165.94

140.88  
134.99  
134.52  
133.55  
132.02  
131.99  
130.18  
128.76  
128.59  
128.12  
127.66  
127.44  
126.96  
125.62  
123.91  
122.42  
121.18  
118.83

77.32  
77.00  
76.68

—43.27

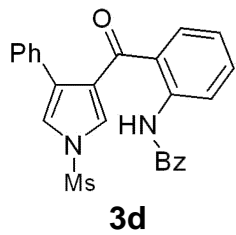

<sup>13</sup>C NMR (100 MHz, CDCl<sub>3</sub>) spectra of **3d**

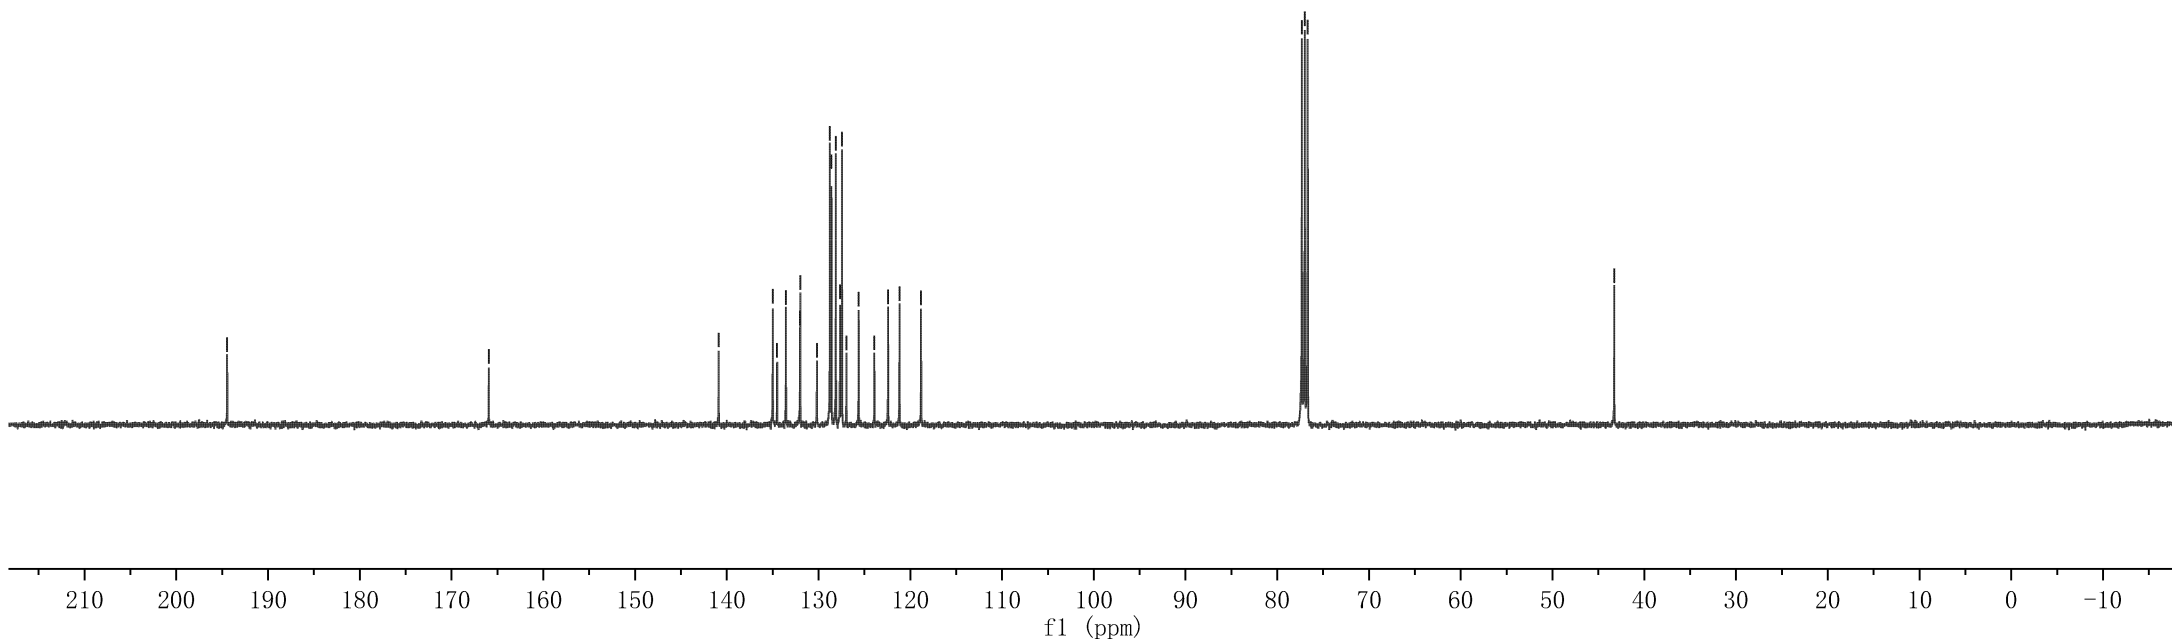

11.782

1

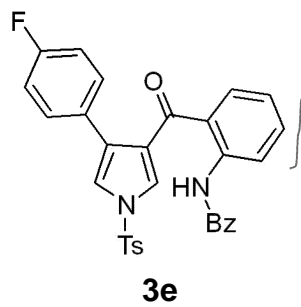

8.814  
8.793  
7.978  
7.958  
7.838  
7.818  
7.781  
7.762  
7.631  
7.612  
7.592  
7.530  
7.512  
7.497  
7.472  
7.453  
7.433  
7.358  
7.338  
7.261  
7.259  
7.234  
7.100  
7.081  
7.062  
7.006  
6.984  
6.962

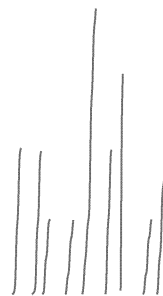

2.427

0.000

<sup>1</sup>H NMR (400 MHz, CDCl<sub>3</sub>) spectra of **3e**

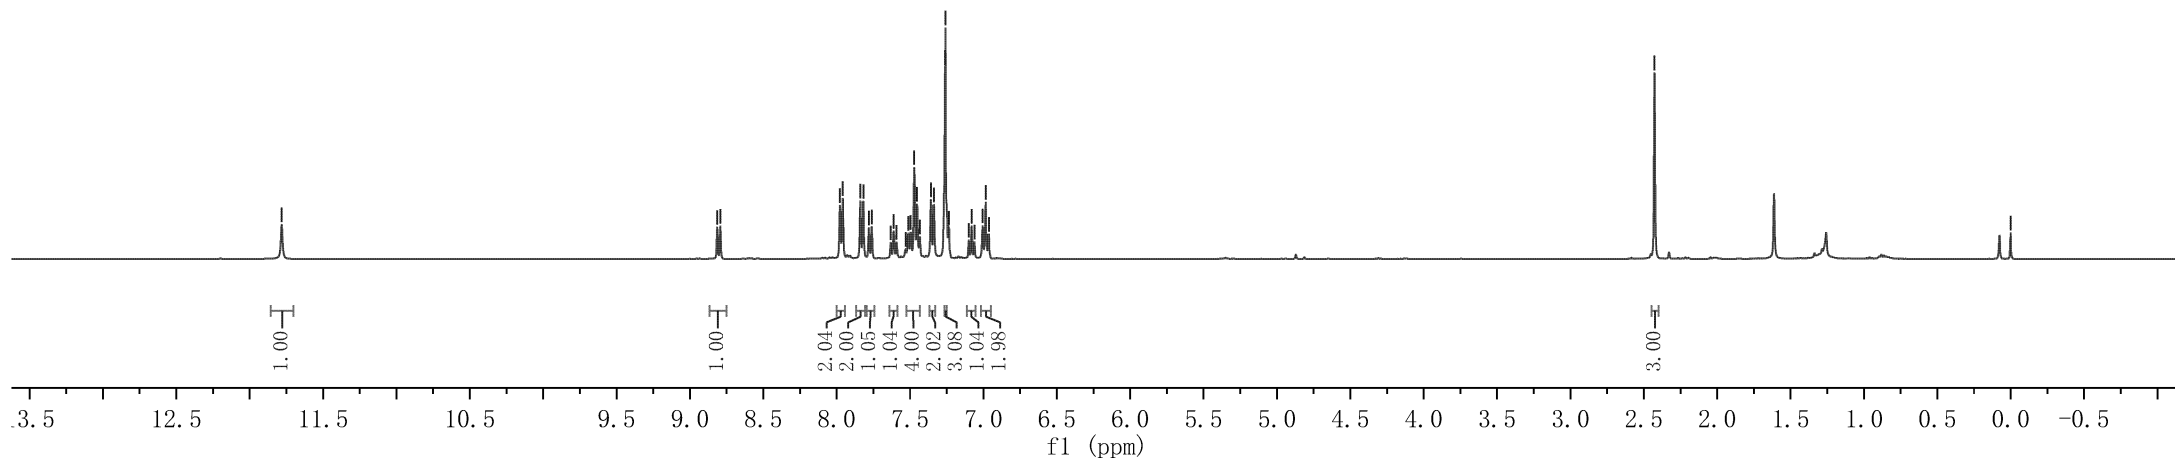

— 194.09

— 165.95  
— 163.47  
— 161.02

— 146.23

— 140.66  
— 134.85  
— 134.76  
— 134.44  
— 133.40  
— 131.99  
— 130.43  
— 129.87  
— 129.79  
— 129.00  
— 128.74  
— 128.30  
— 128.27  
— 127.39  
— 126.42  
— 124.25  
— 122.49  
— 121.36  
— 119.05  
— 115.56  
— 115.34

— 77.32  
— 77.00  
— 76.68

— 21.70

<sup>13</sup>C NMR (100 MHz, CDCl<sub>3</sub>) spectra of **3e**

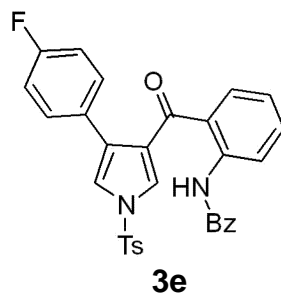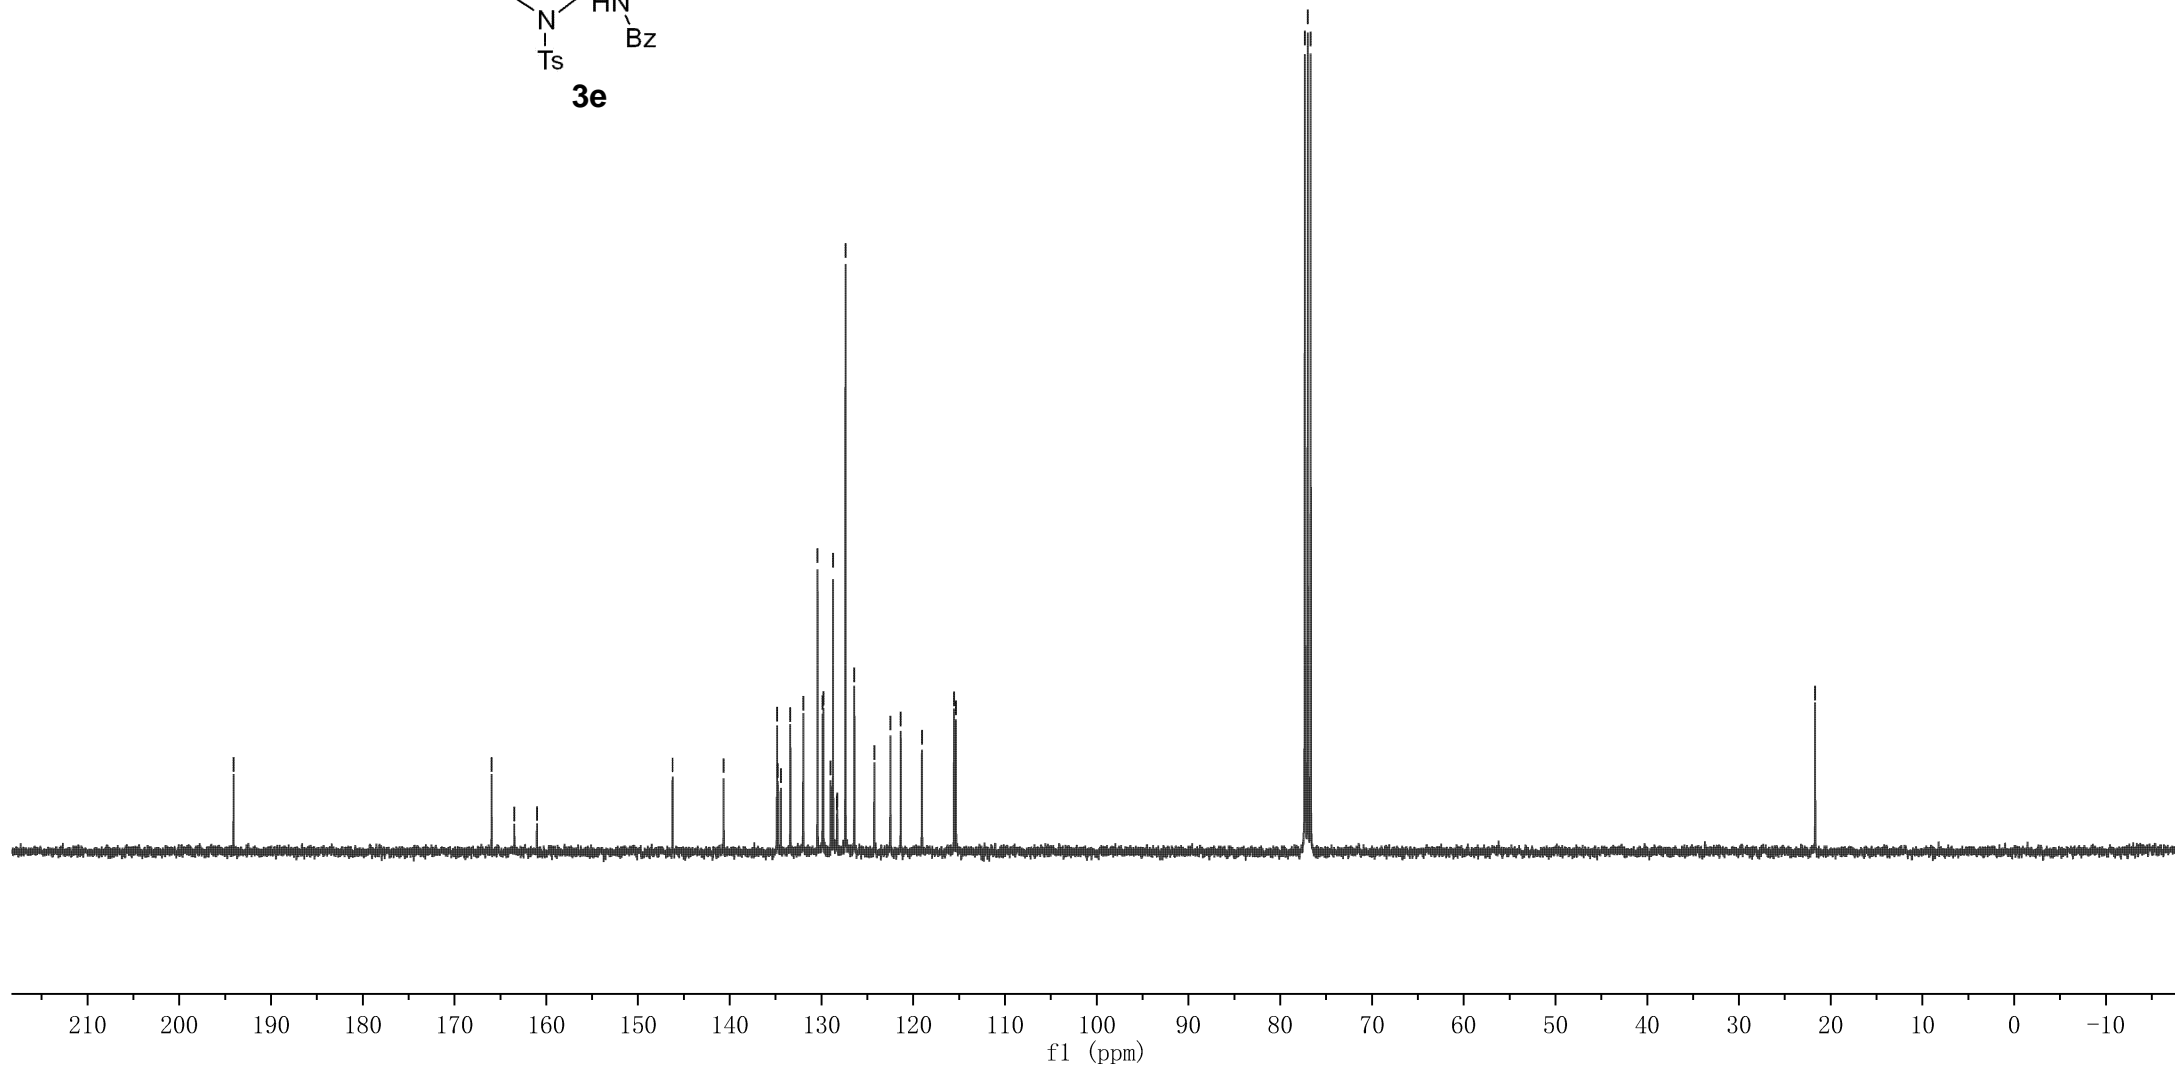



11.764

8.819  
8.798  
7.974  
7.956  
7.838  
7.818  
7.797  
7.778  
7.648  
7.627  
7.608  
7.515  
7.497  
7.470  
7.460  
7.438  
7.362  
7.342  
7.283  
7.262  
7.230  
7.212  
7.119  
7.101  
7.083

2.431

0.000

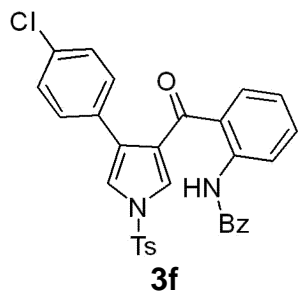

<sup>1</sup>H NMR (400 MHz, CDCl<sub>3</sub>) spectra of **3f**

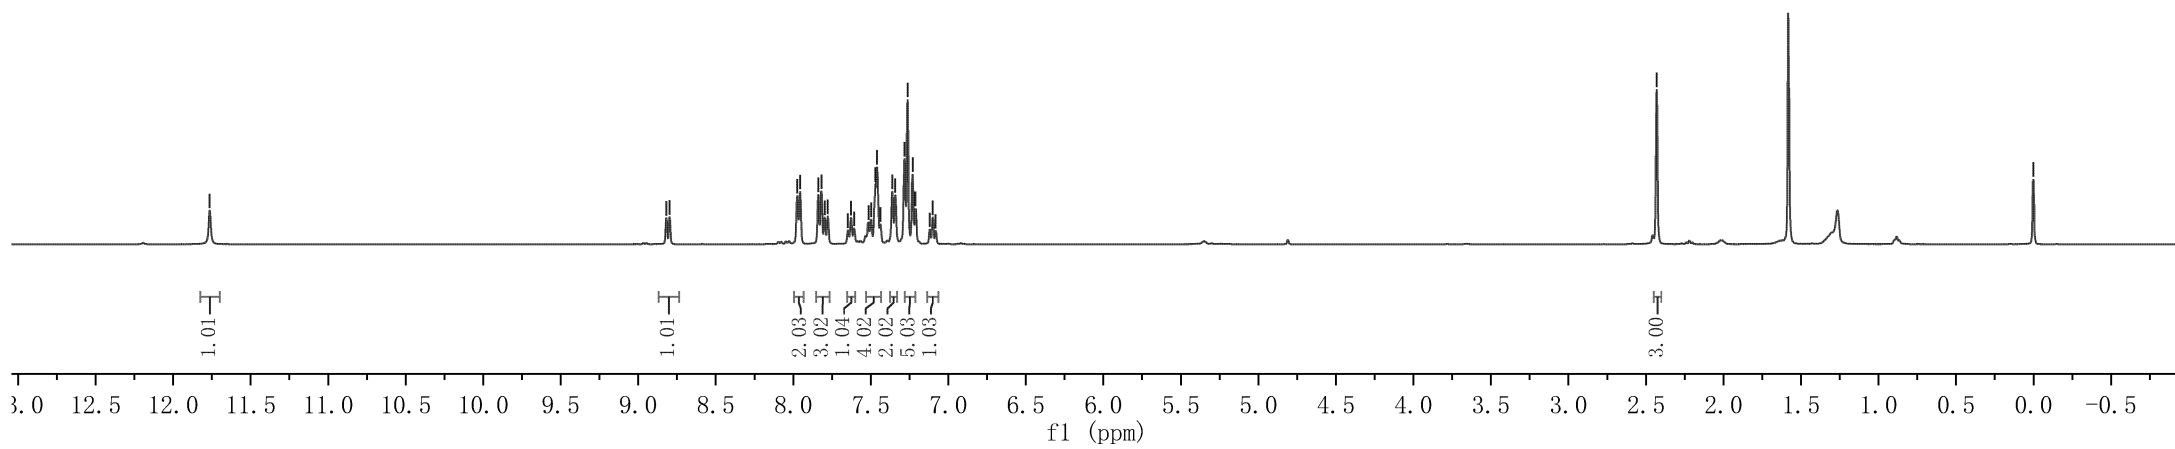

—193.97

—165.99

—146.30

—140.71

—134.91

—134.74

—134.45

—133.49

—133.37

—132.01

—130.76

—130.47

—129.44

—128.87

—128.76

—128.68

—127.41

—126.58

—126.35

—124.28

—122.55

—121.45

—119.28

—77.32

—77.00

—76.68

—21.72

<sup>13</sup>C NMR (100 MHz, CDCl<sub>3</sub>) spectra of **3f**

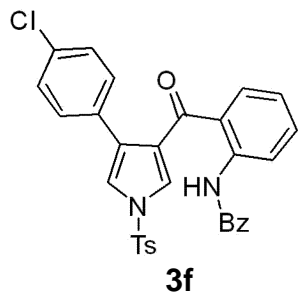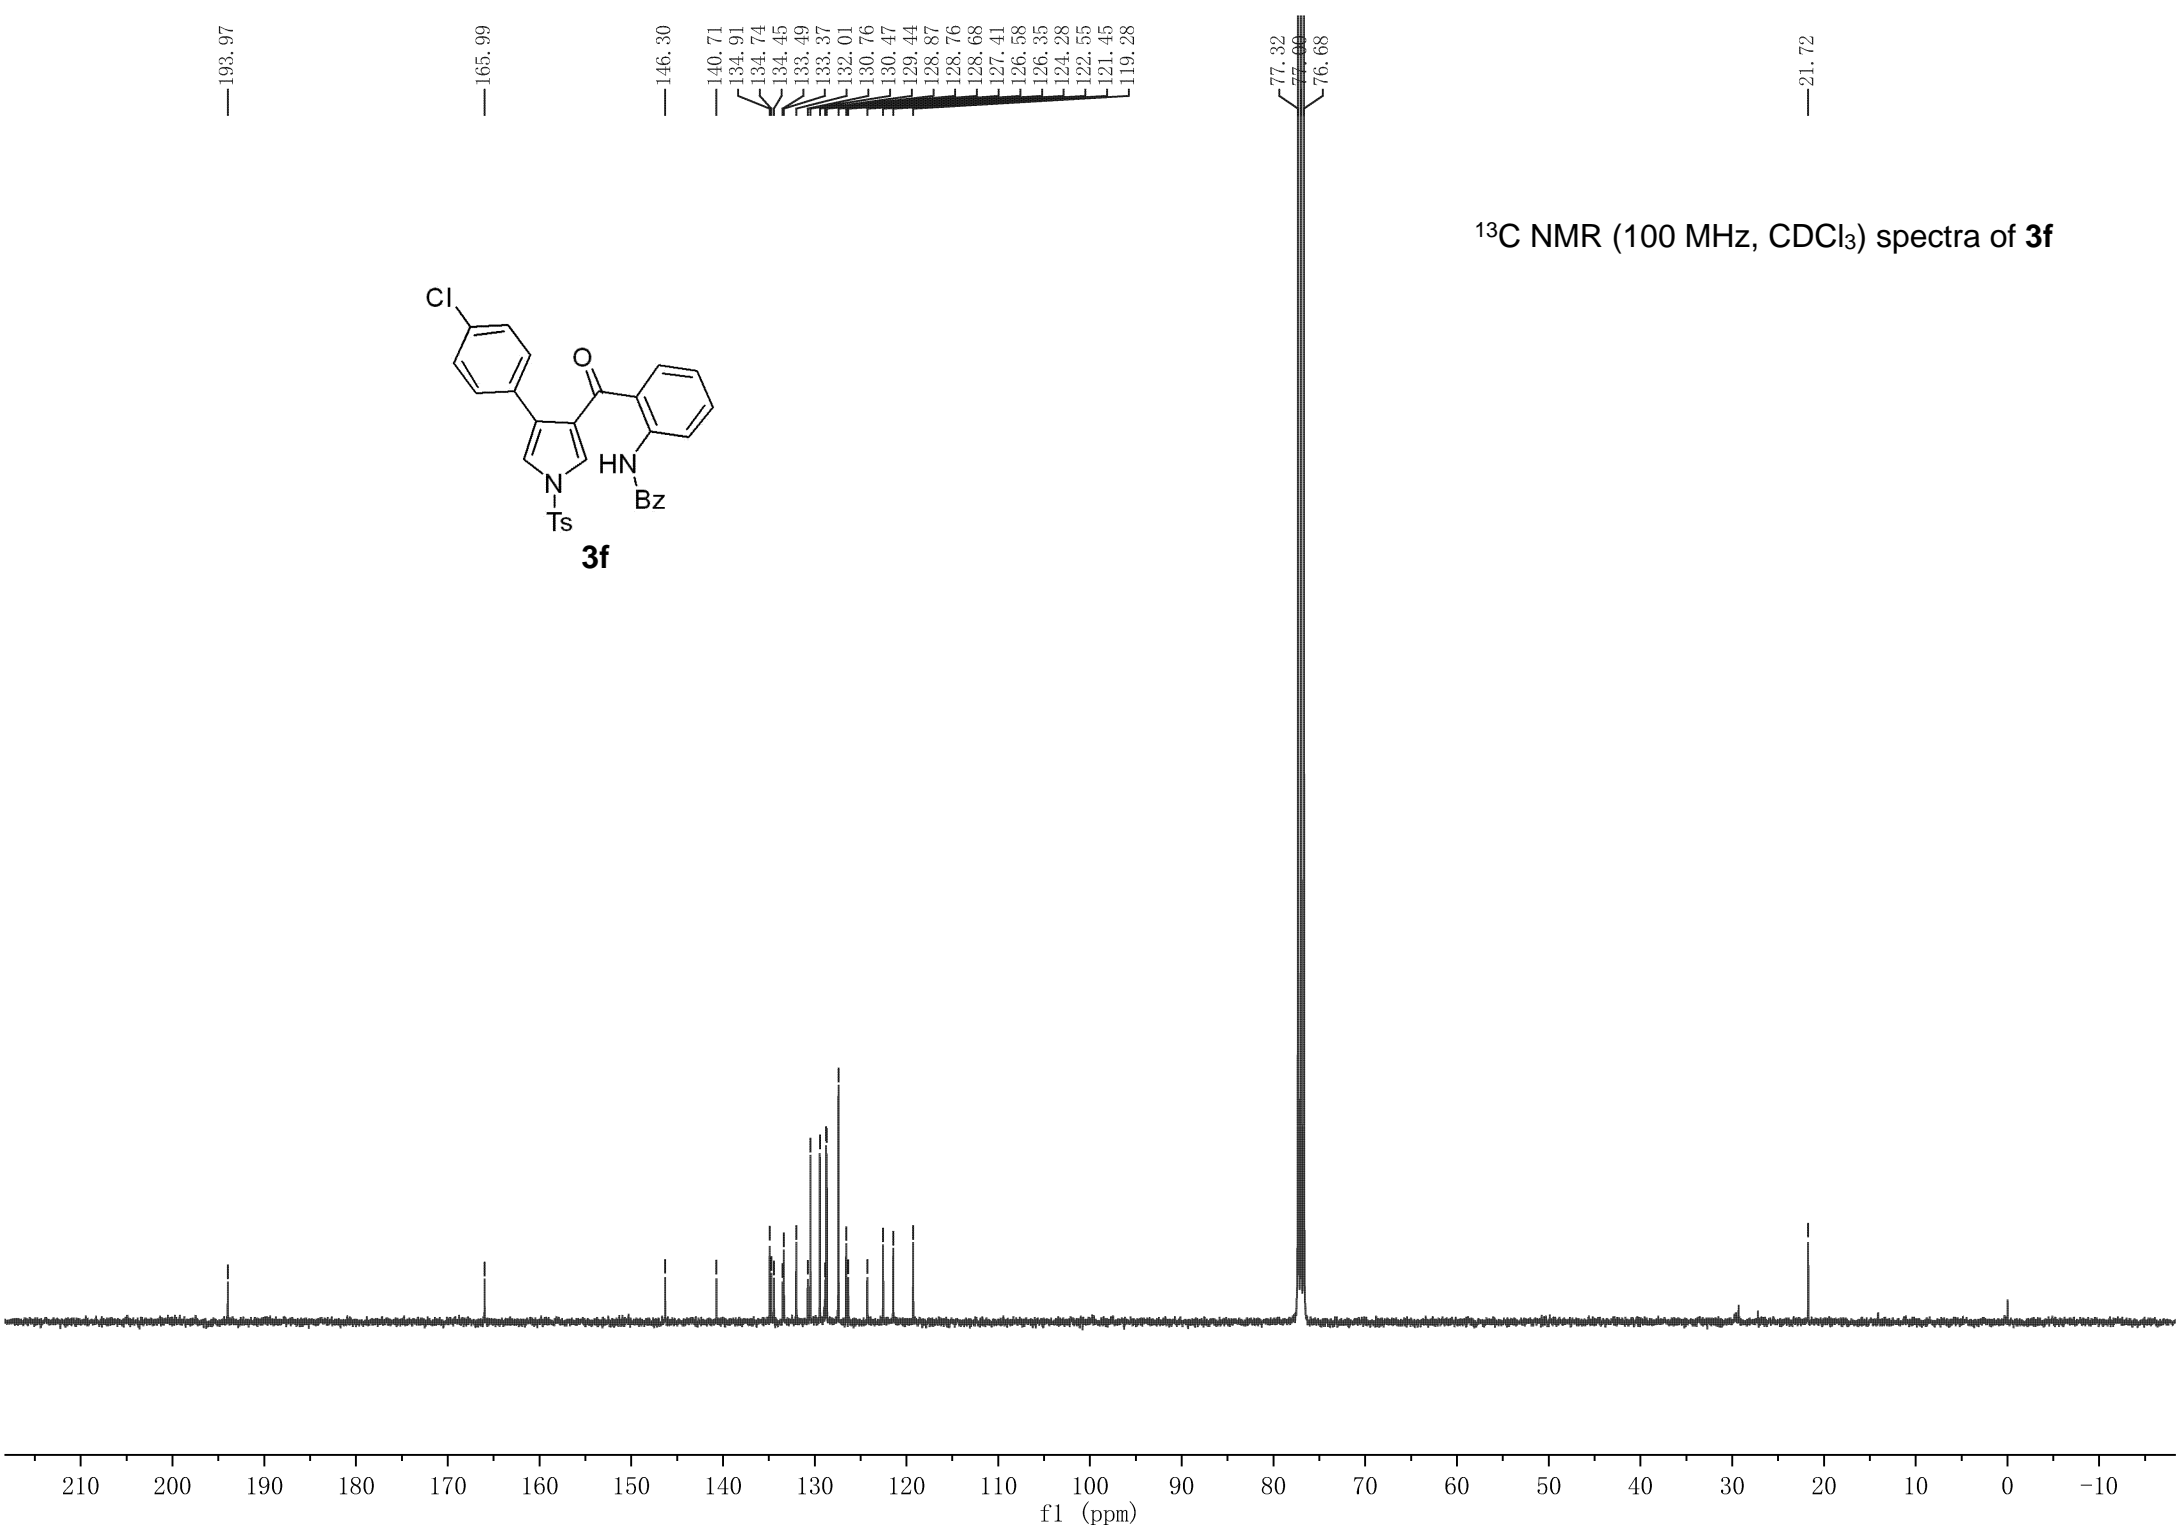

11.758

8.819  
8.798  
7.972  
7.953  
7.836  
7.817  
7.800  
7.780  
7.649  
7.630  
7.611  
7.533  
7.514  
7.497  
7.473  
7.459  
7.435  
7.416  
7.359  
7.340  
7.301  
7.286  
7.263  
7.172  
7.153  
7.123  
7.104  
7.085

2.429

0.000

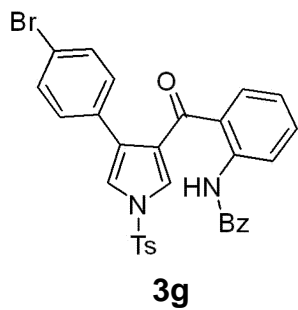

<sup>1</sup>H NMR (400 MHz, CDCl<sub>3</sub>) spectra of **3g**

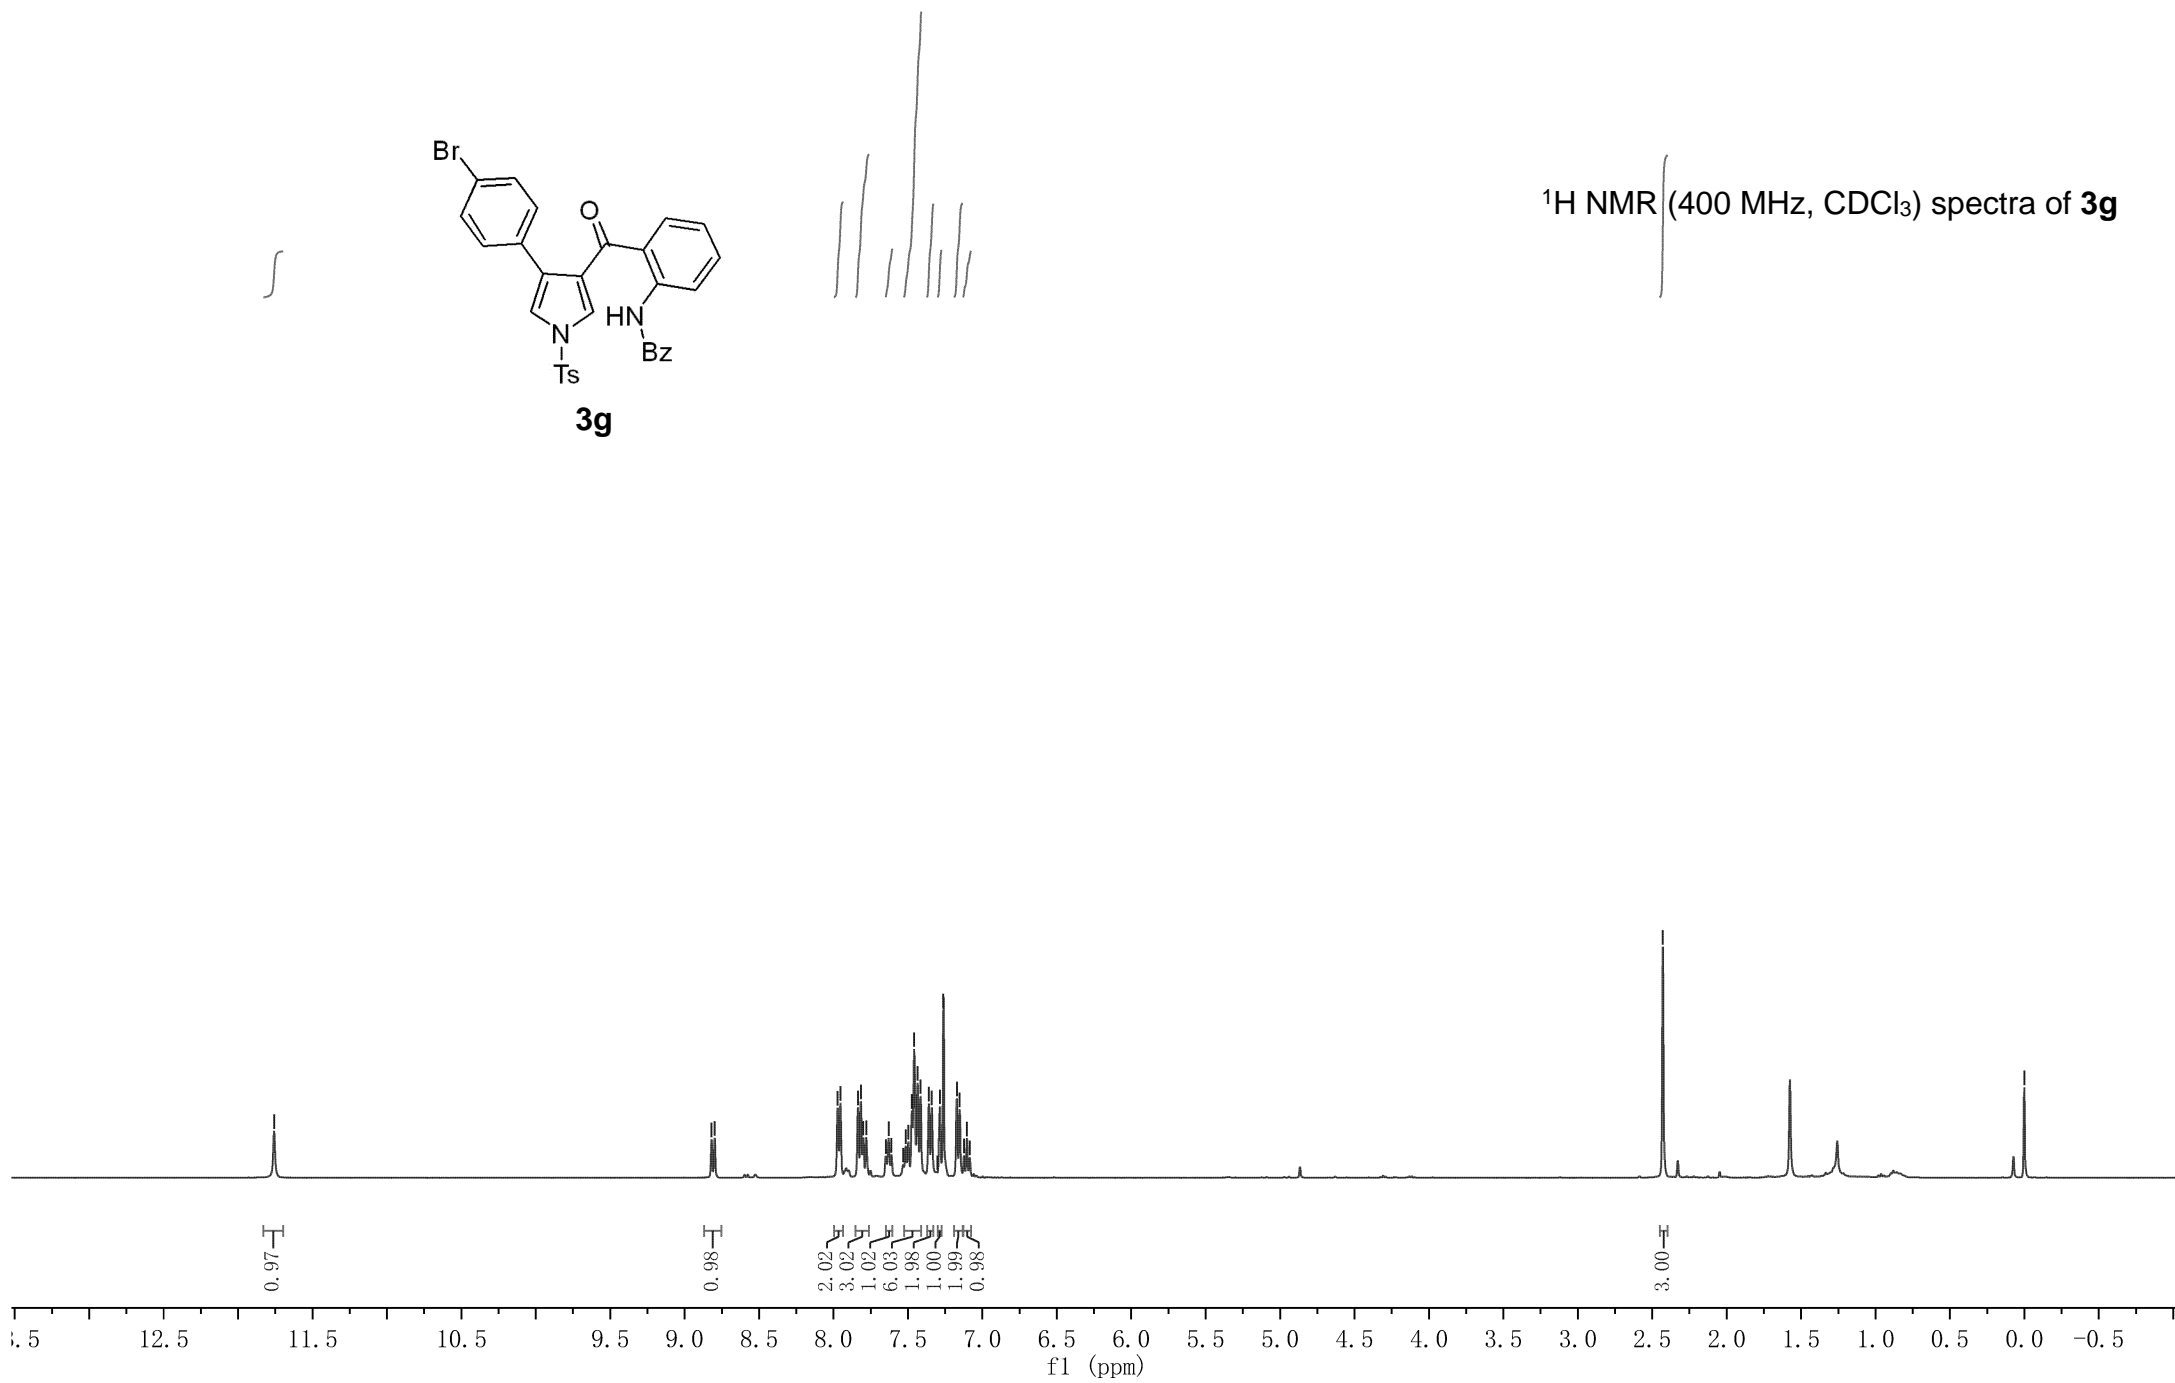

—193.93

—165.98

—146.32

—140.71

—134.92

—134.71

—134.44

—133.35

—132.02

—131.62

—131.23

—130.47

—129.75

—128.89

—128.76

—127.42

—127.40

—126.62

—126.29

—124.28

—122.56

—121.64

—121.46

—119.26

—77.32

—77.00

—76.68

—21.72

<sup>13</sup>C NMR (100 MHz, CDCl<sub>3</sub>) spectra of **3g**

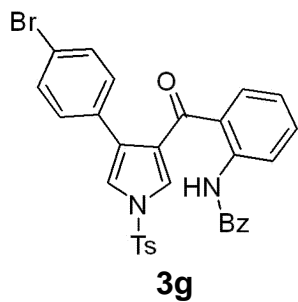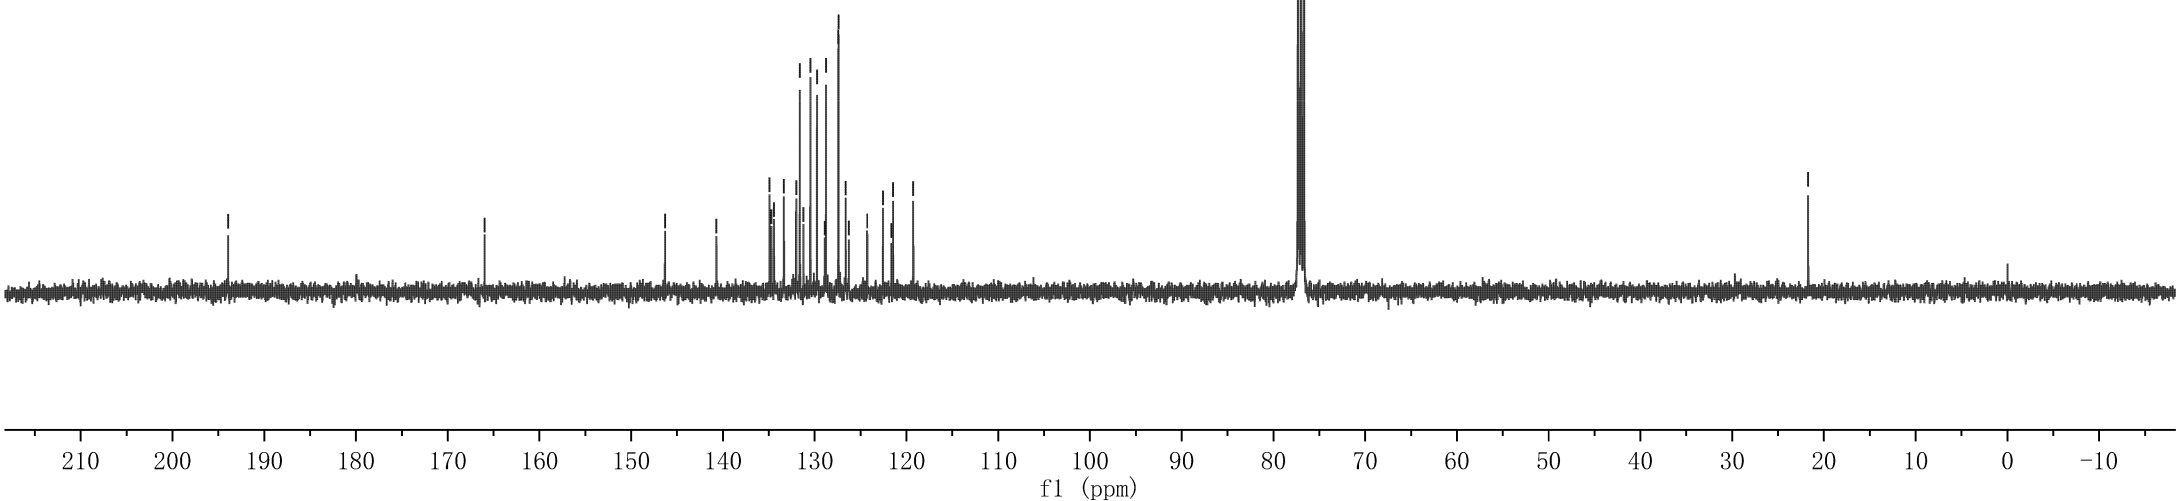

11.725

8.821  
8.801  
7.966  
7.949  
7.850  
7.832  
7.817  
7.796  
7.653  
7.634  
7.615  
7.568  
7.549  
7.490  
7.471  
7.453  
7.420  
7.401  
7.372  
7.348  
7.130  
7.111  
7.092

2.434

0.000

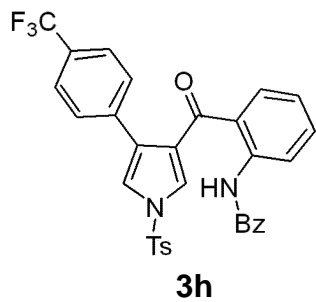

<sup>1</sup>H NMR (400 MHz, CDCl<sub>3</sub>) spectra of **3h**

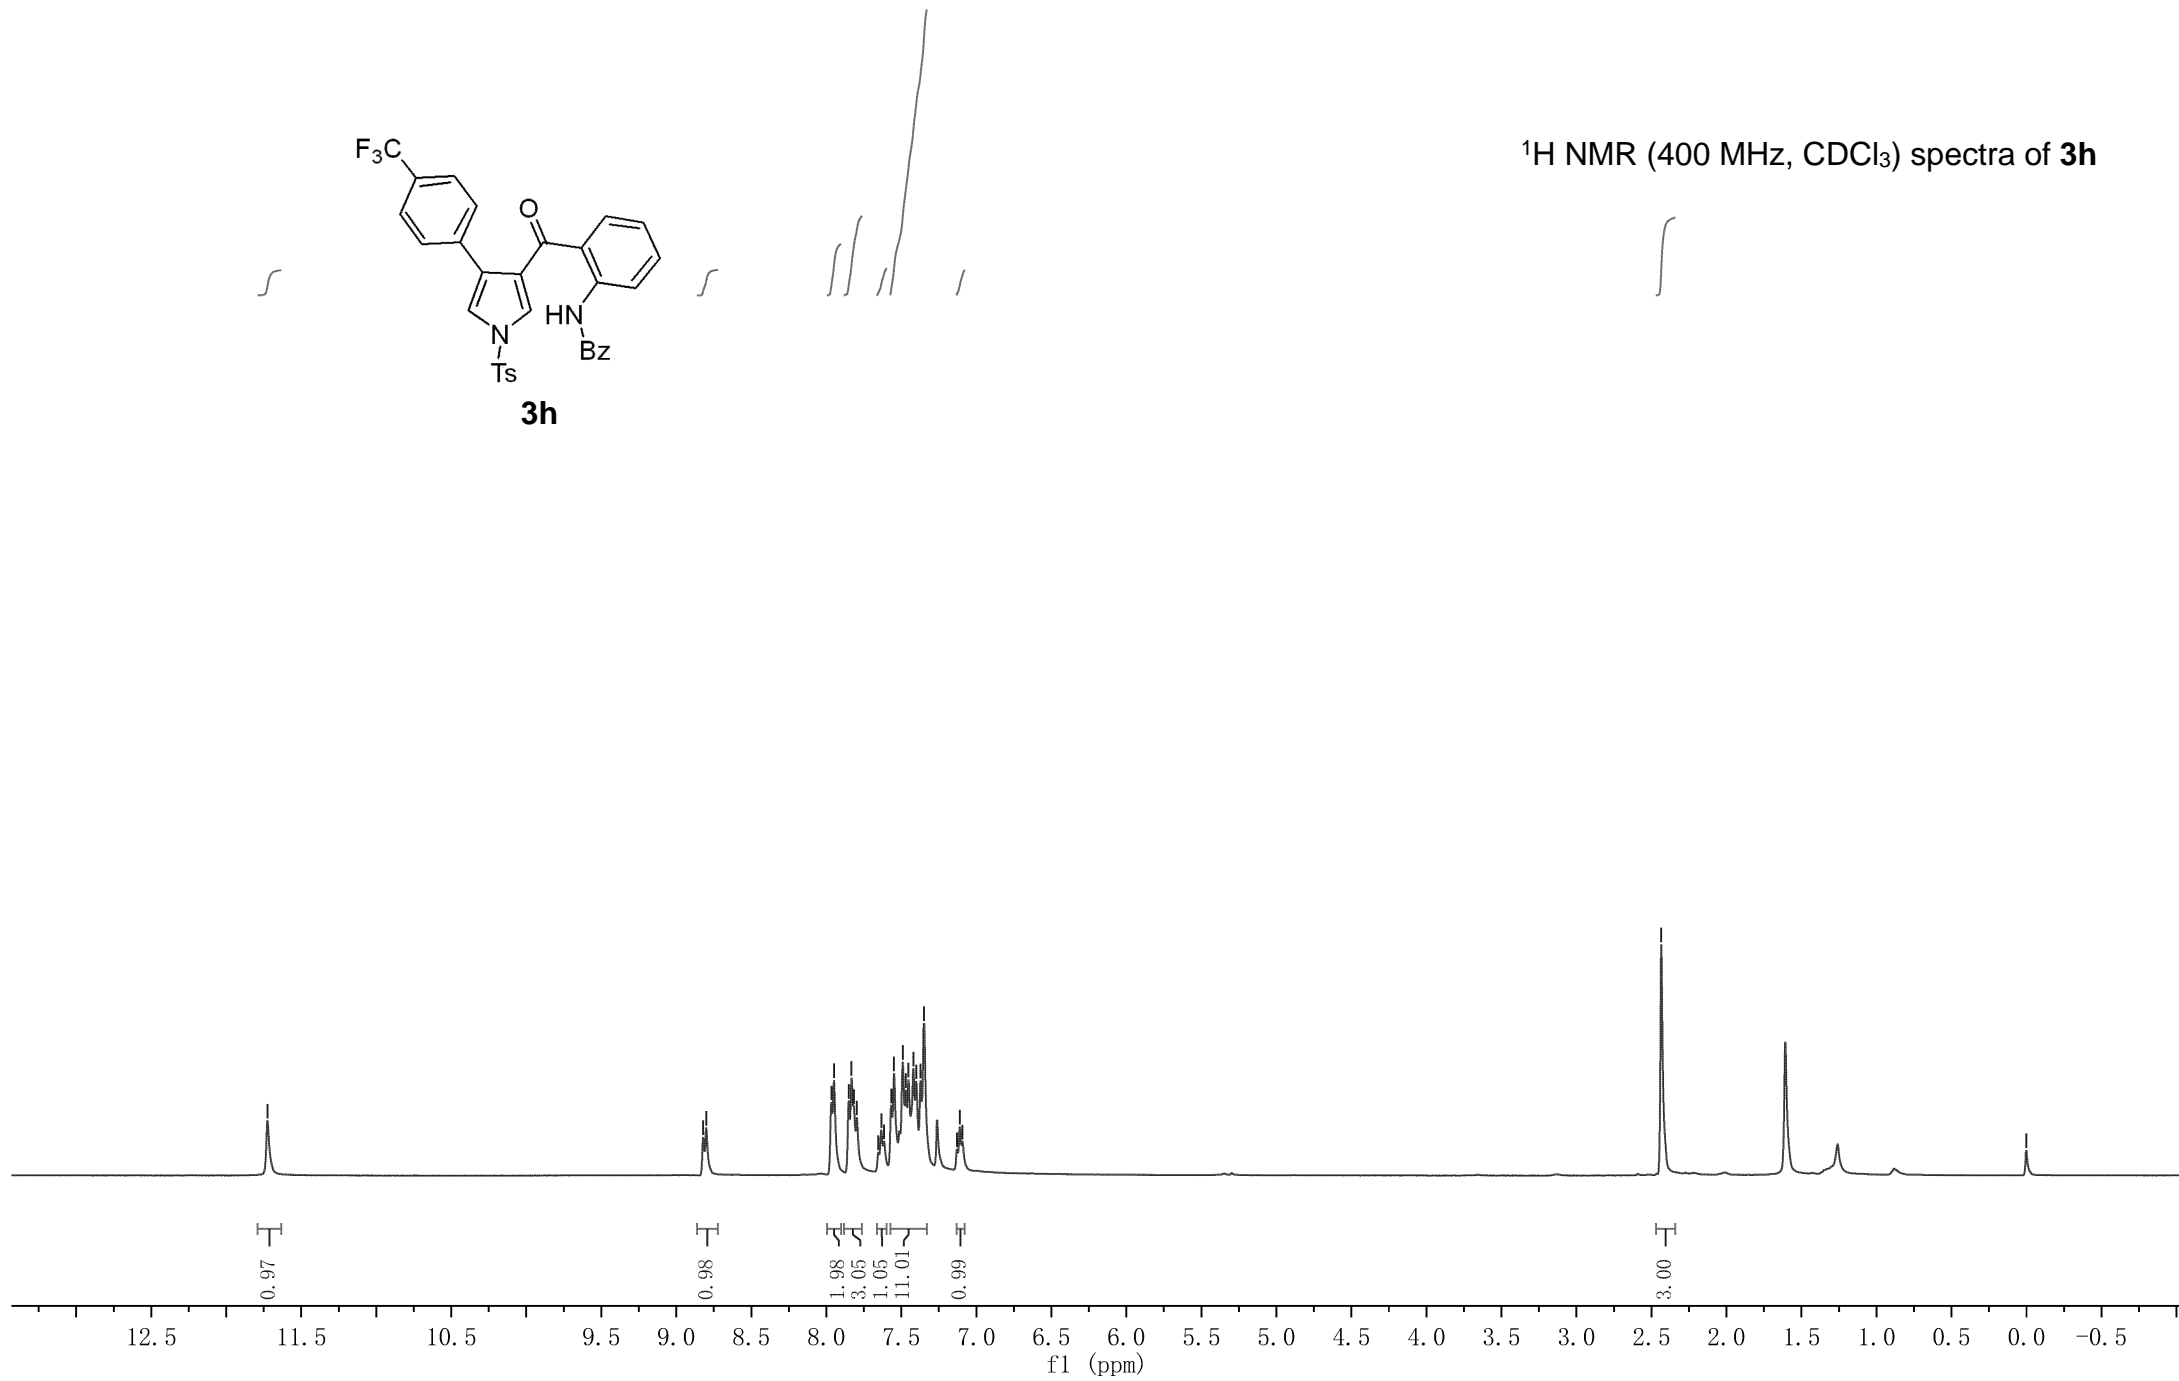

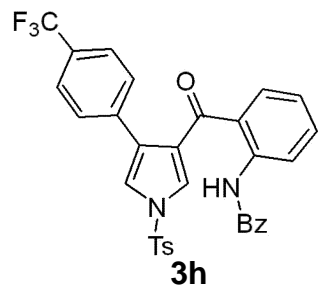

<sup>13</sup>C NMR (100 MHz, CDCl<sub>3</sub>) spectra of **3h**

193.75, 165.98, 146.43, 140.70, 134.97, 134.62, 134.41, 133.27, 132.03, 130.52, 128.77, 128.65, 128.43, 127.45, 127.38, 126.81, 126.31, 125.47, 125.43, 125.40, 125.36, 124.27, 122.57, 121.53, 119.88, 77.32, 77.00, 76.68, 21.73

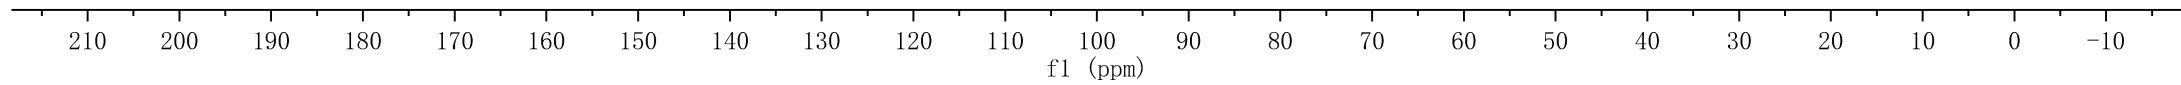

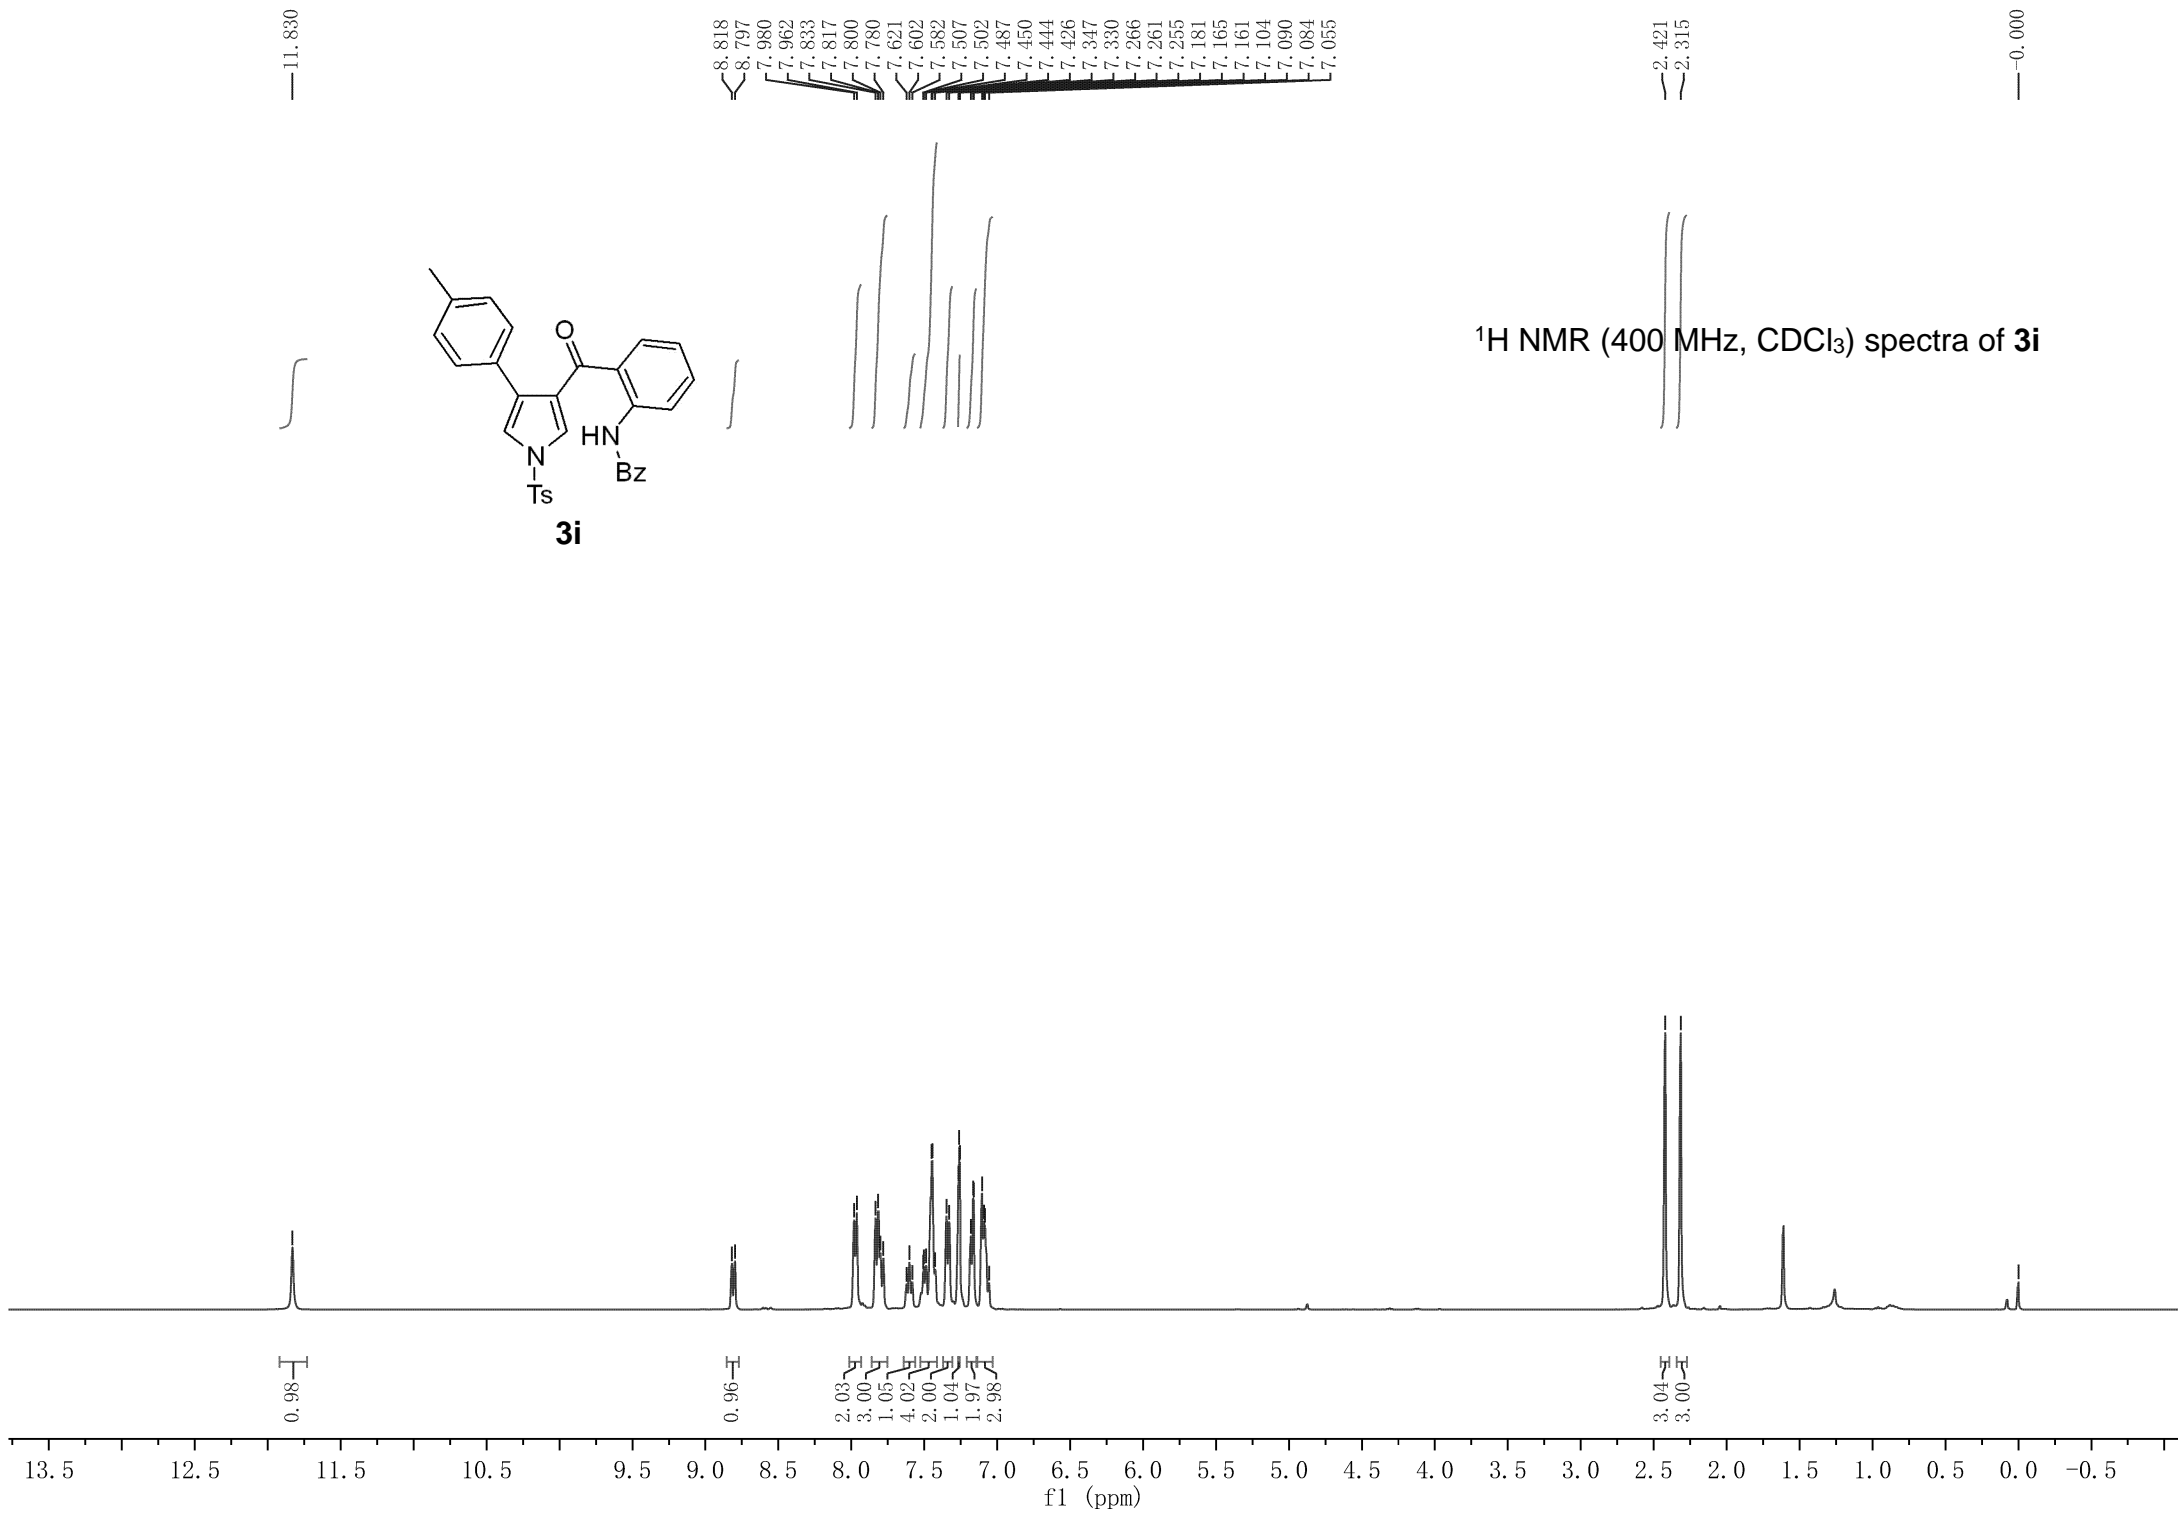

— 194.41

— 166.01

— 146.09  
— 140.67  
— 137.32  
— 134.89  
— 134.74  
— 134.49  
— 133.56  
— 131.93  
— 130.38  
— 129.98  
— 129.21  
— 128.71  
— 127.94  
— 127.44  
— 127.36  
— 126.61  
— 126.15  
— 124.37  
— 122.48  
— 121.26  
— 118.84

77.32  
77.00  
76.68

21.69  
21.16

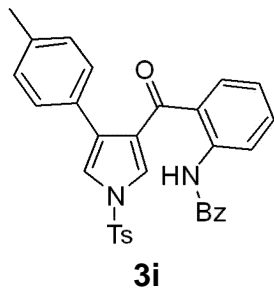

<sup>13</sup>C NMR (100 MHz, CDCl<sub>3</sub>) spectra of **3i**

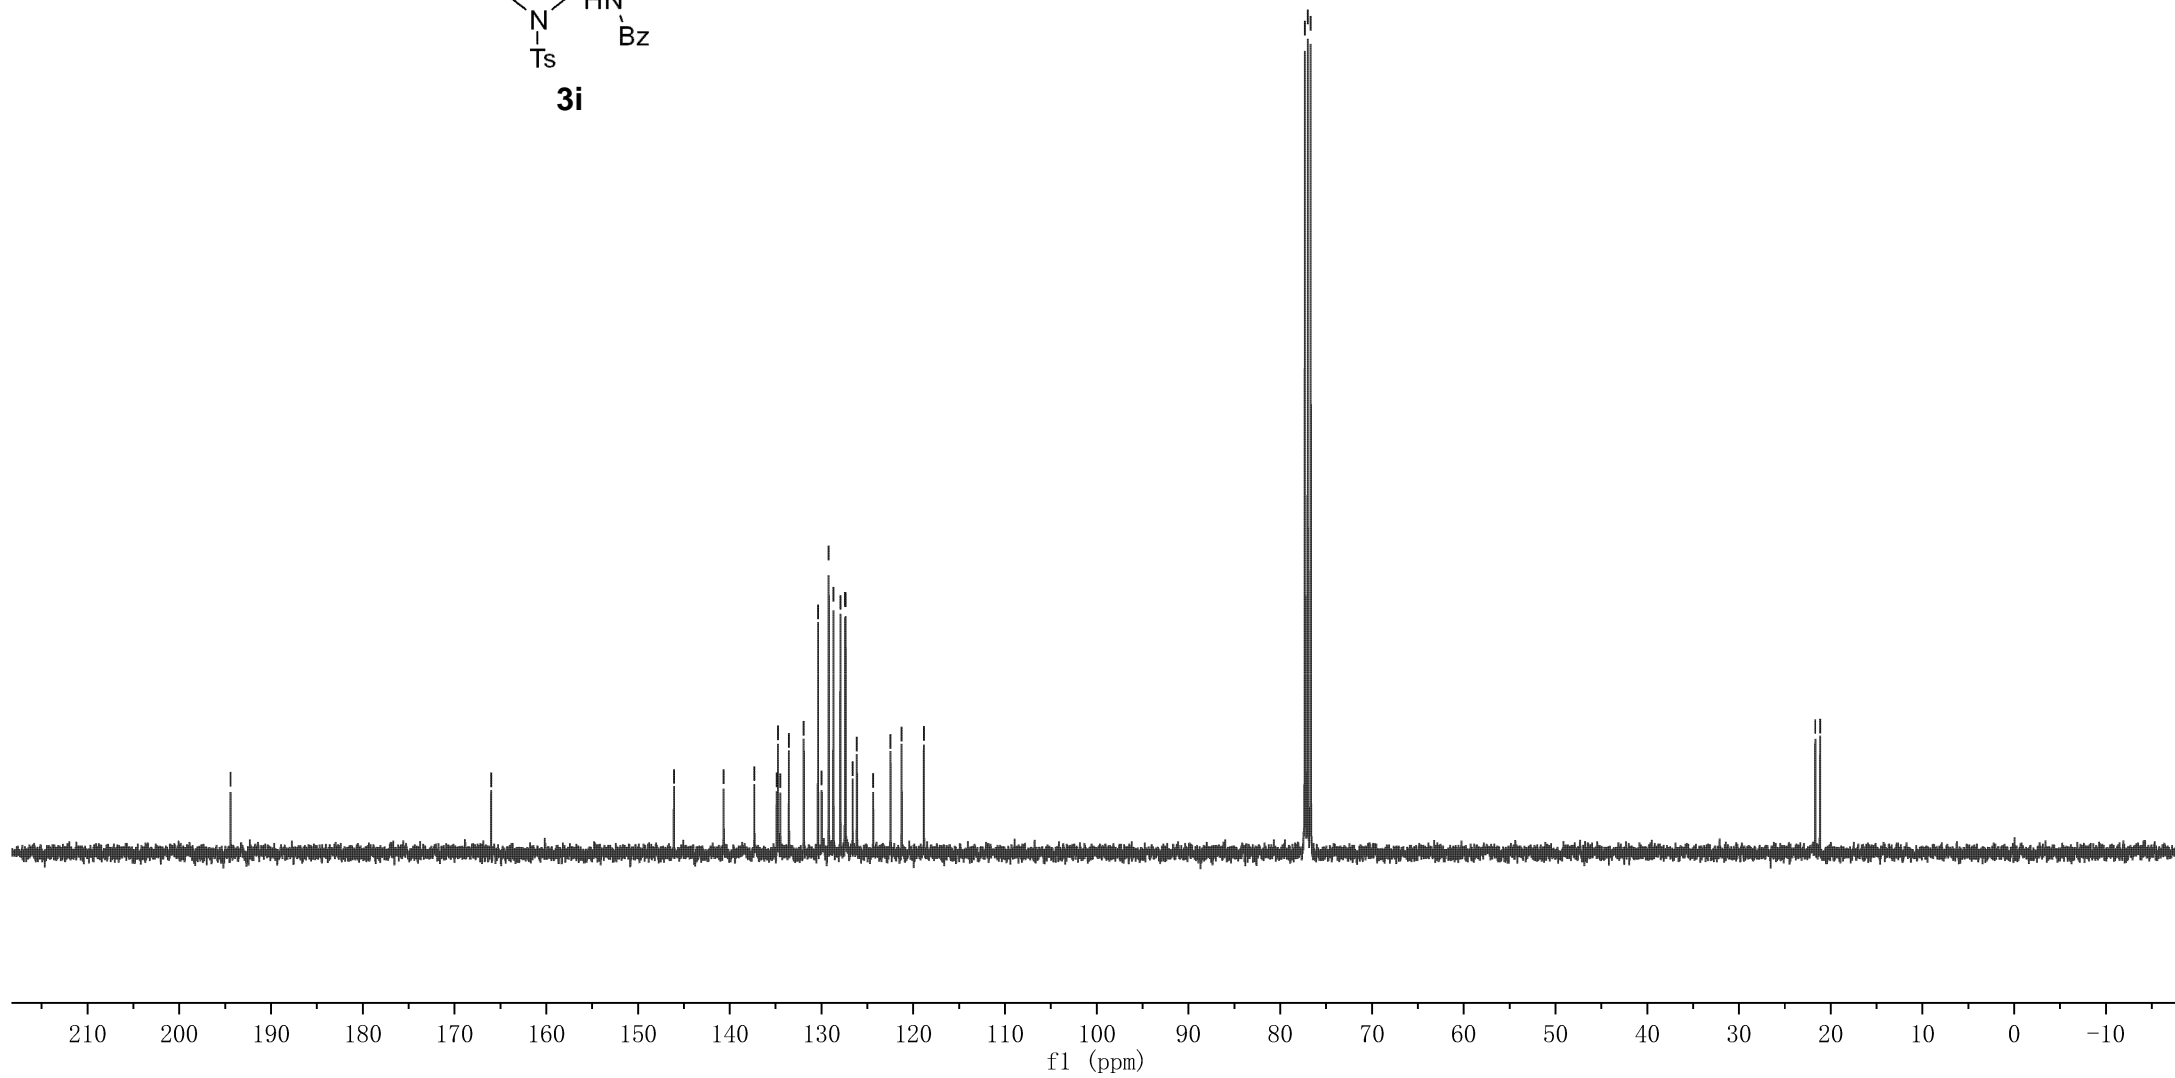



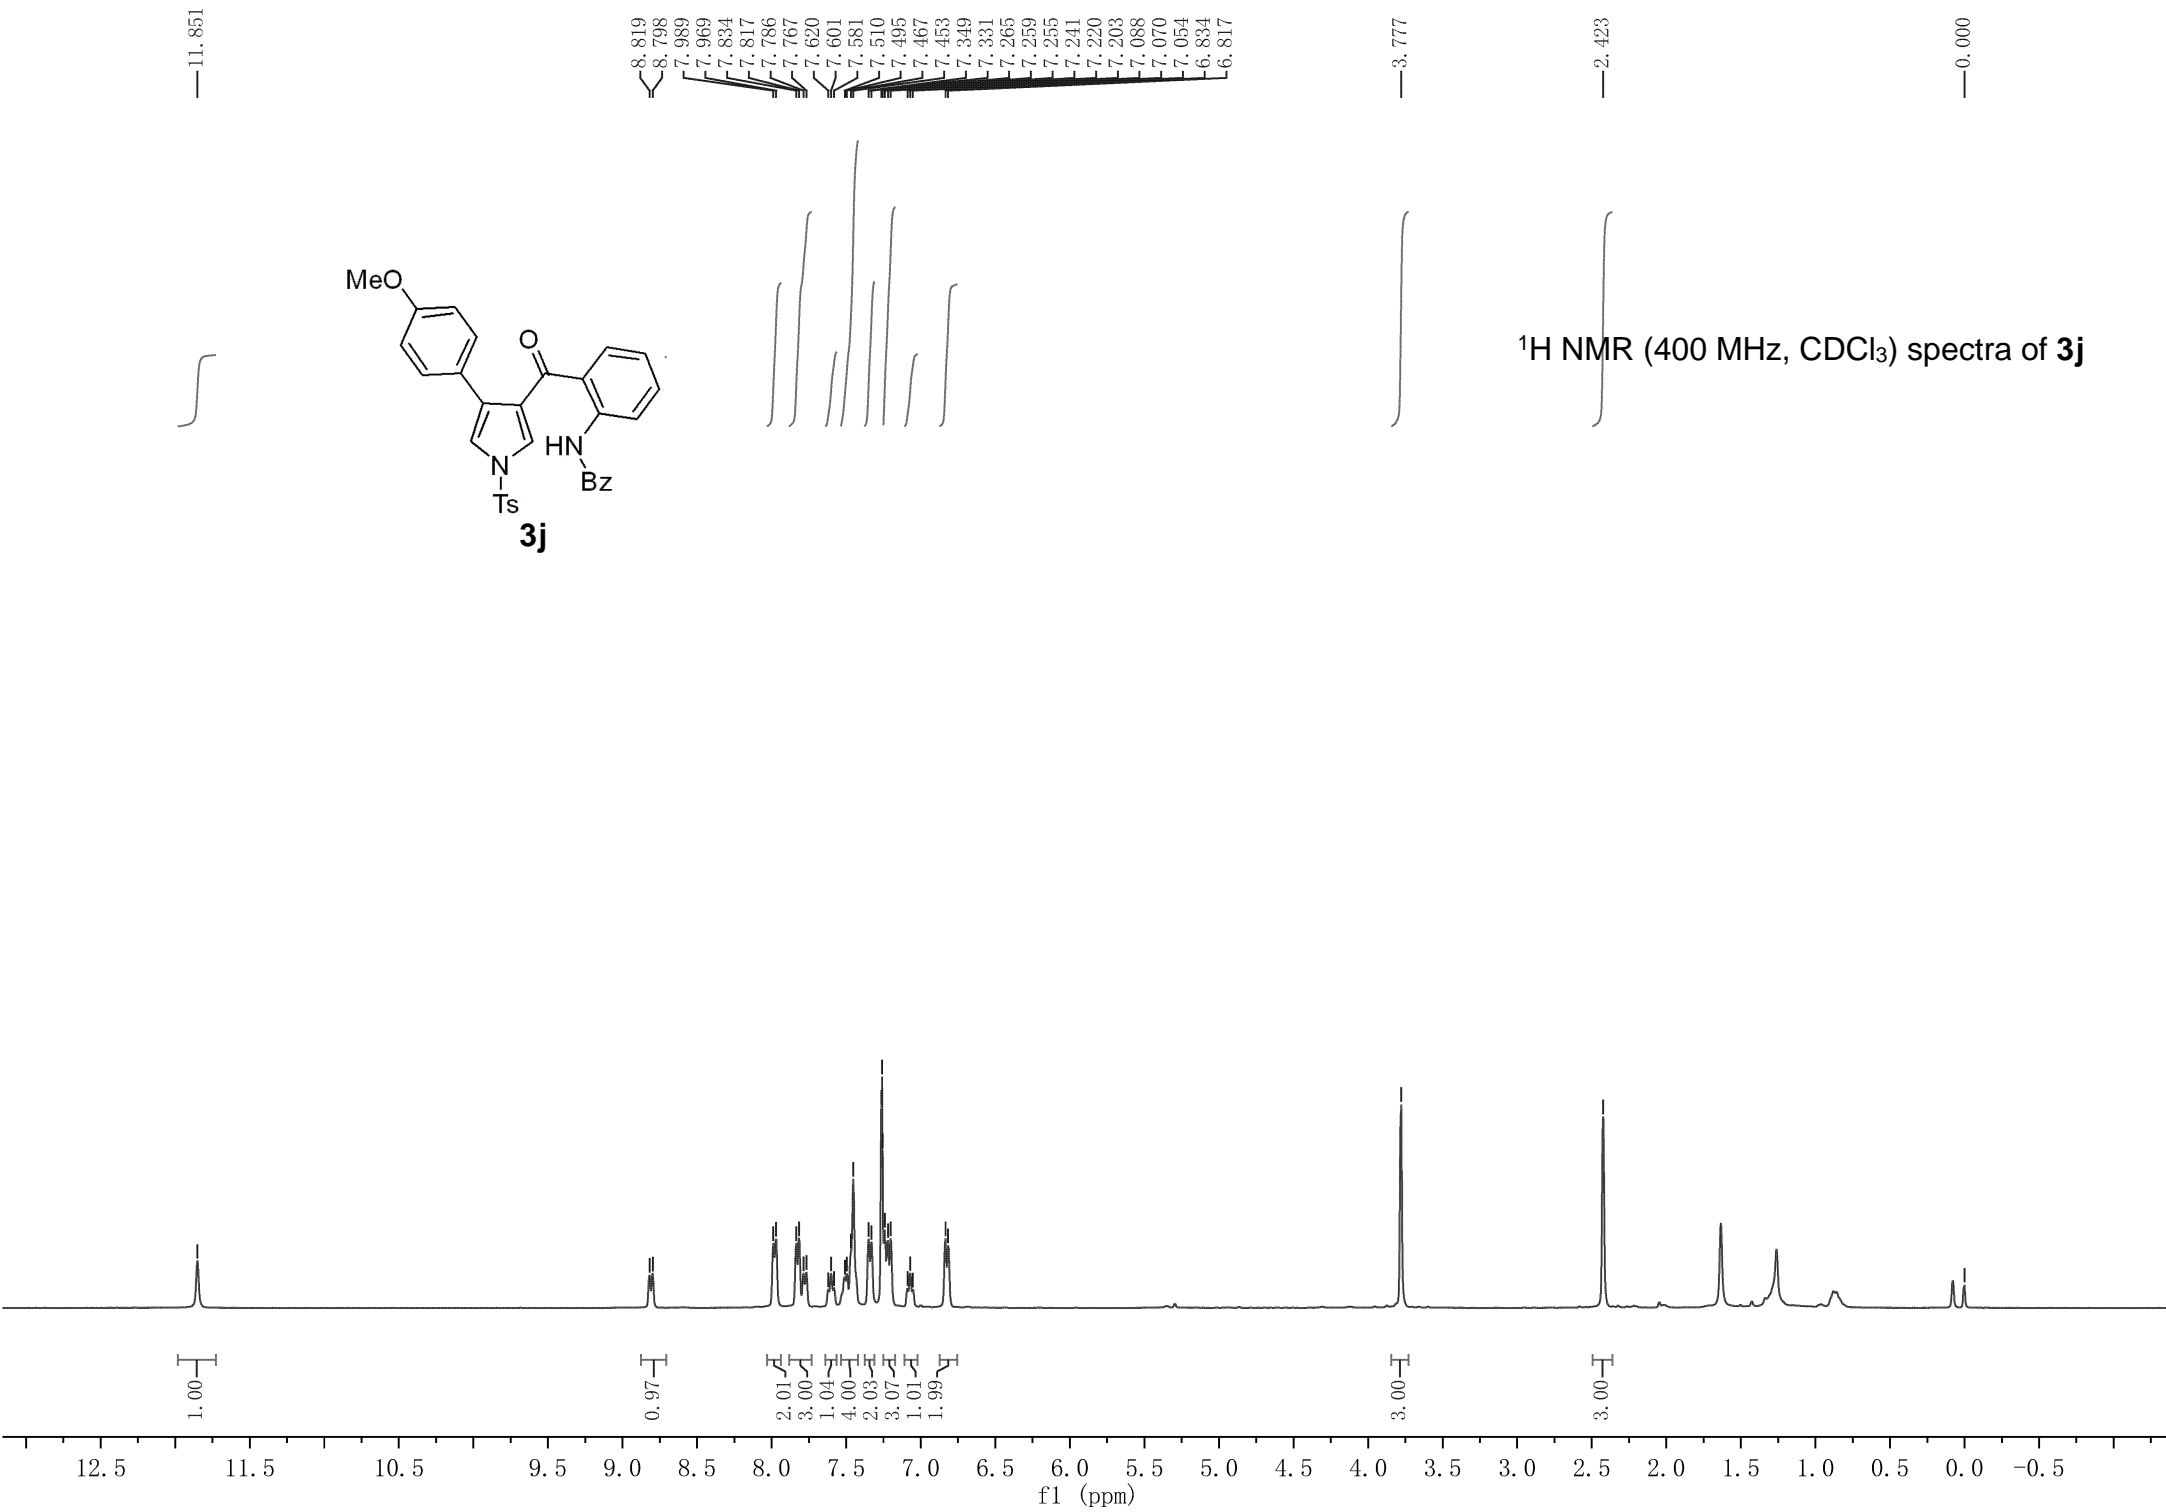

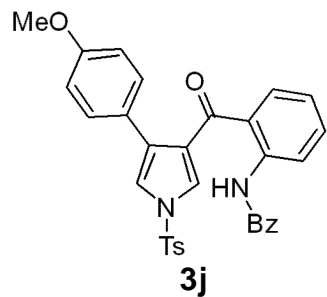

<sup>13</sup>C NMR (100 MHz, CDCl<sub>3</sub>) spectra of **3j**

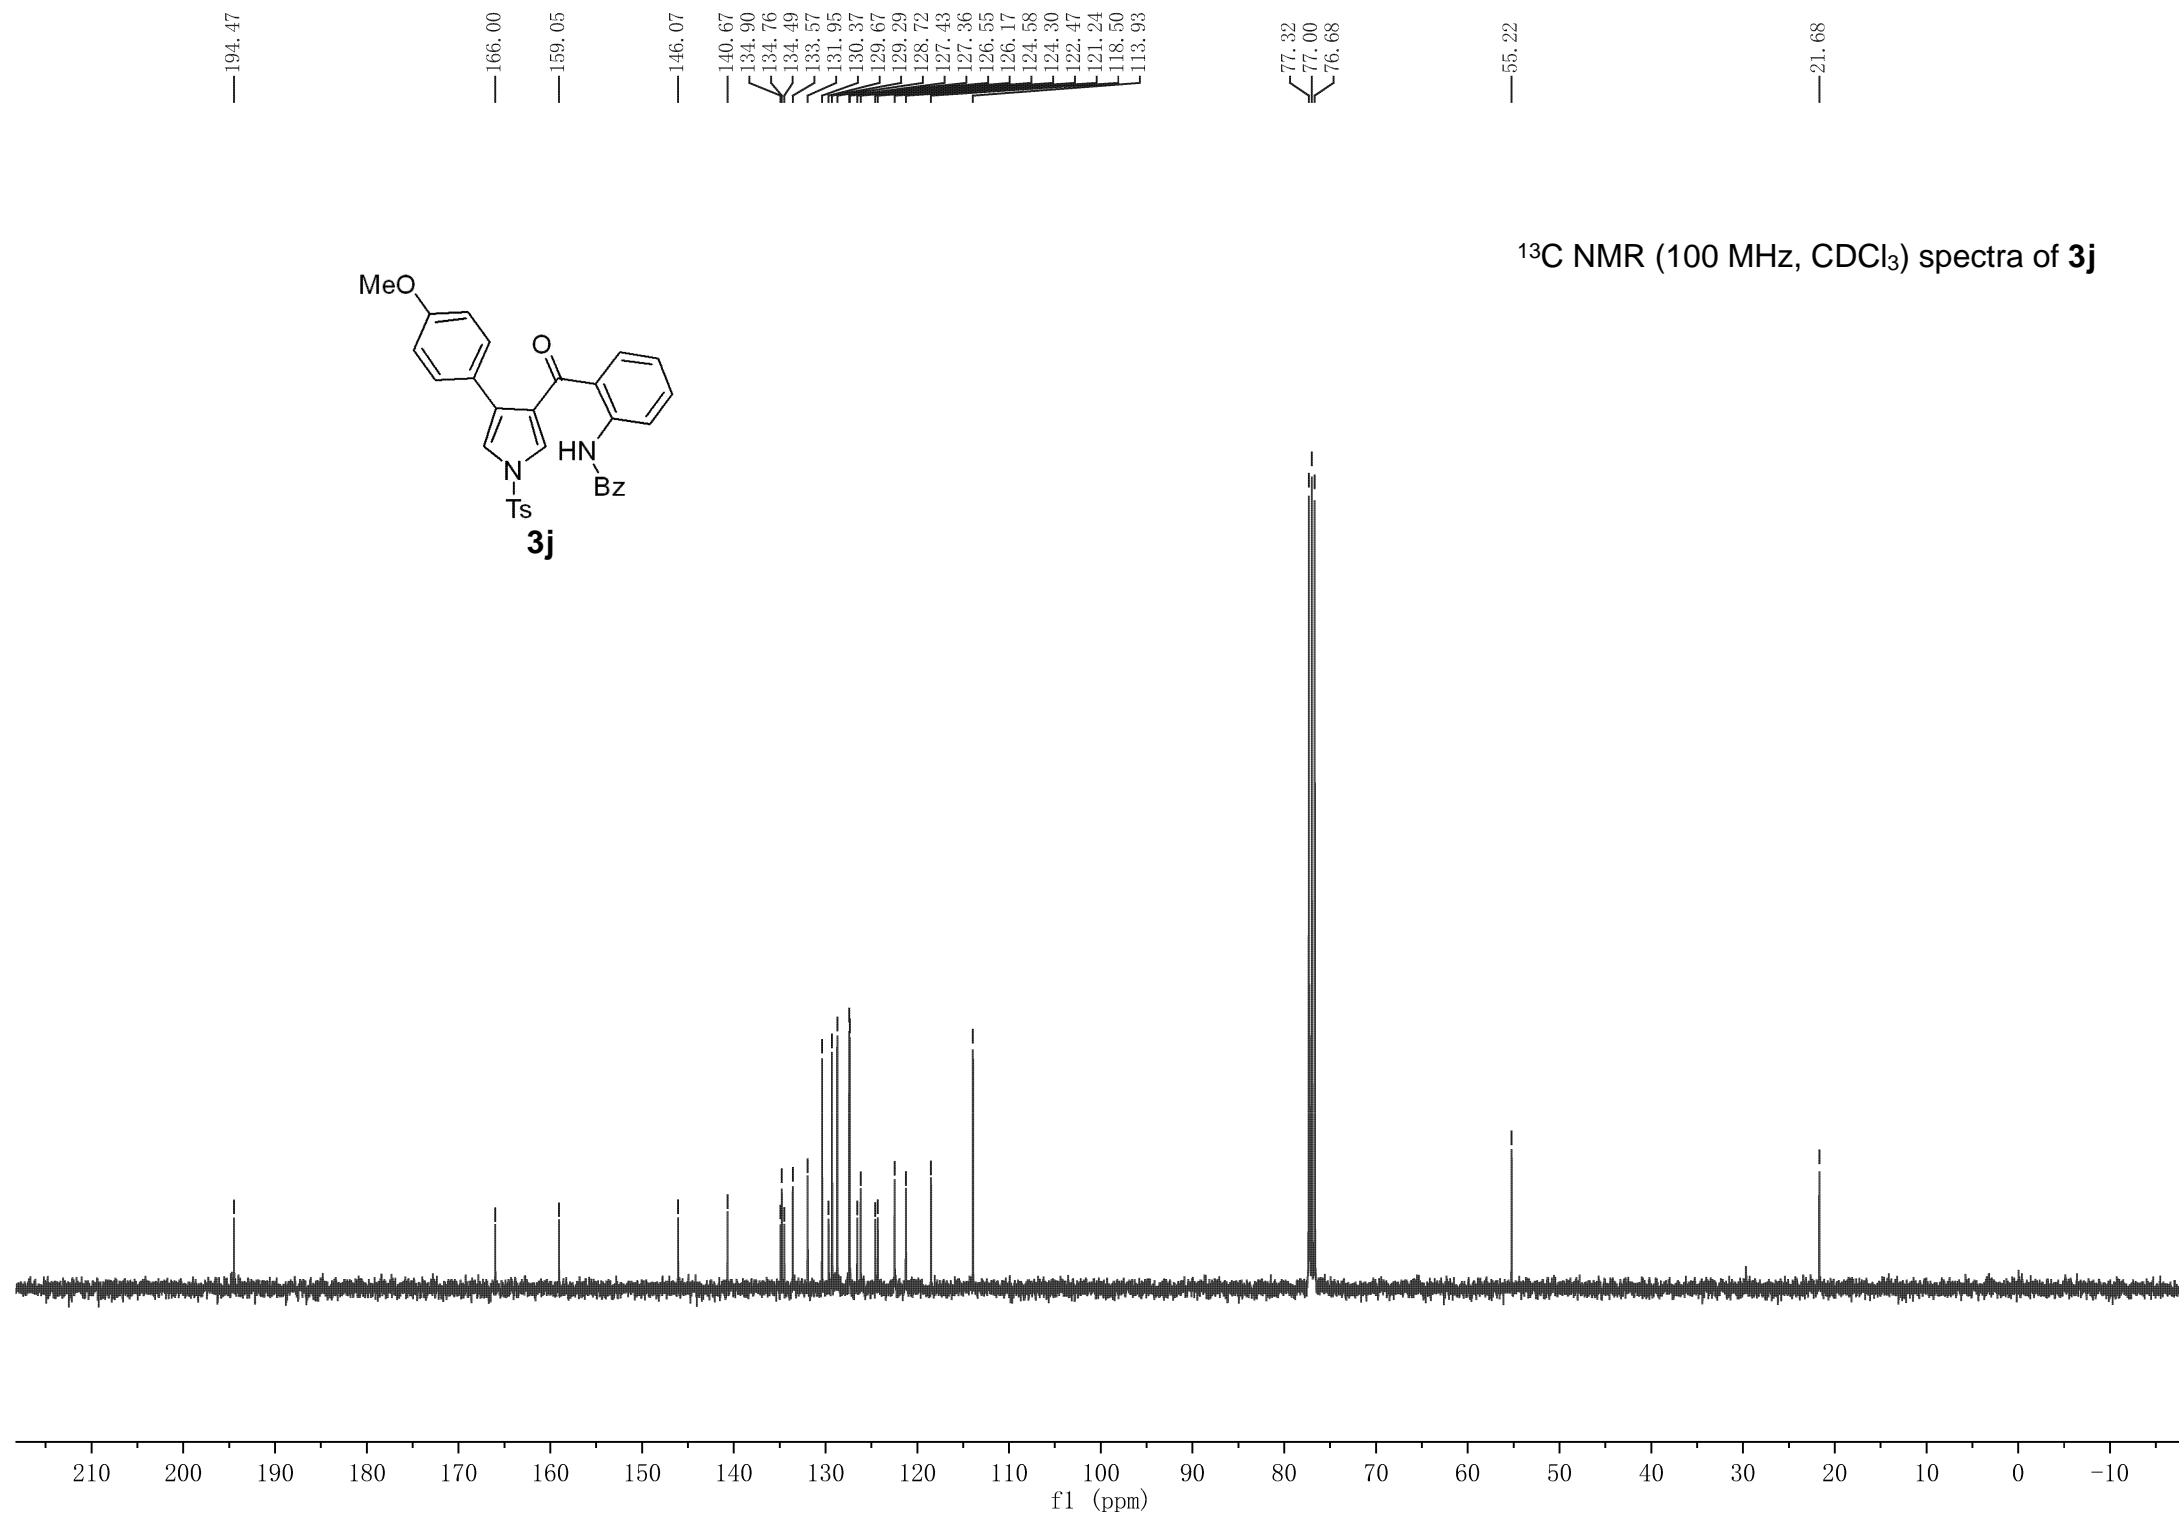

11.858

8.828  
8.807  
7.997  
7.818  
7.797  
7.751  
7.731  
7.634  
7.615  
7.595  
7.545  
7.528  
7.510  
7.491  
7.472  
7.455  
7.436  
7.430  
7.381  
7.374  
7.353  
7.348  
7.337  
7.316  
7.269  
7.257  
7.250  
7.103  
7.088  
7.066

2.410

0.000

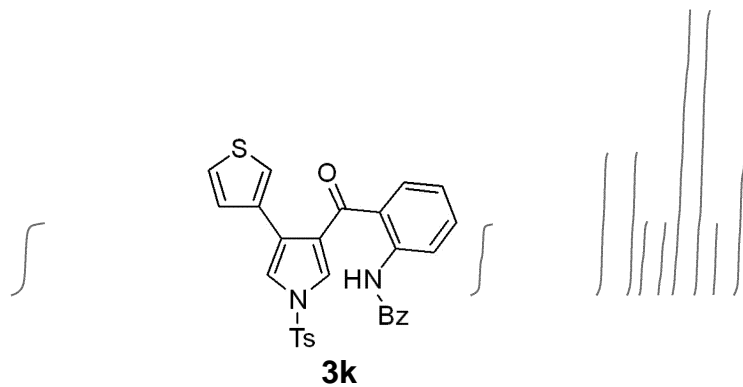

<sup>1</sup>H NMR (400 MHz, CDCl<sub>3</sub>) spectra of **3k**

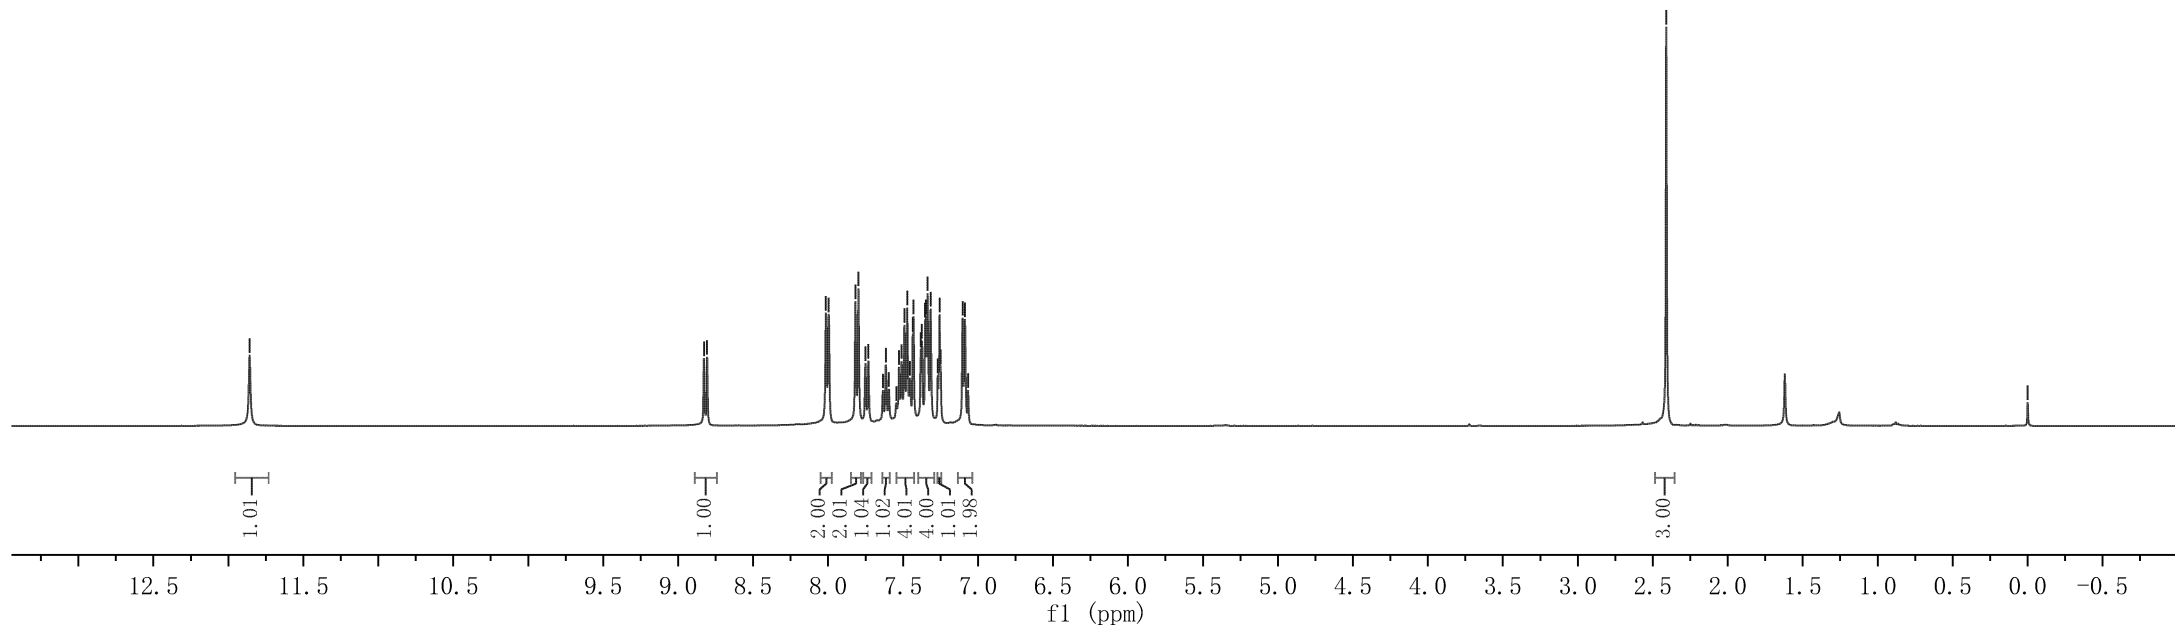

—194.35

—165.93

—146.16

—140.65

—134.82

—134.75

—134.49

—133.55

—132.34

—131.99

—130.39

—128.76

—127.65

—127.40

—127.34

—126.48

—126.43

—125.59

—124.52

—124.41

—122.68

—122.47

—121.29

—119.01

77.32

77.00

76.68

—21.68

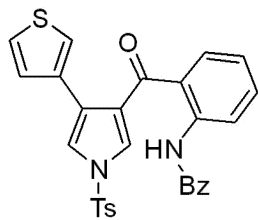

**3k**

<sup>13</sup>C NMR (100 MHz, CDCl<sub>3</sub>) spectra of **3k**

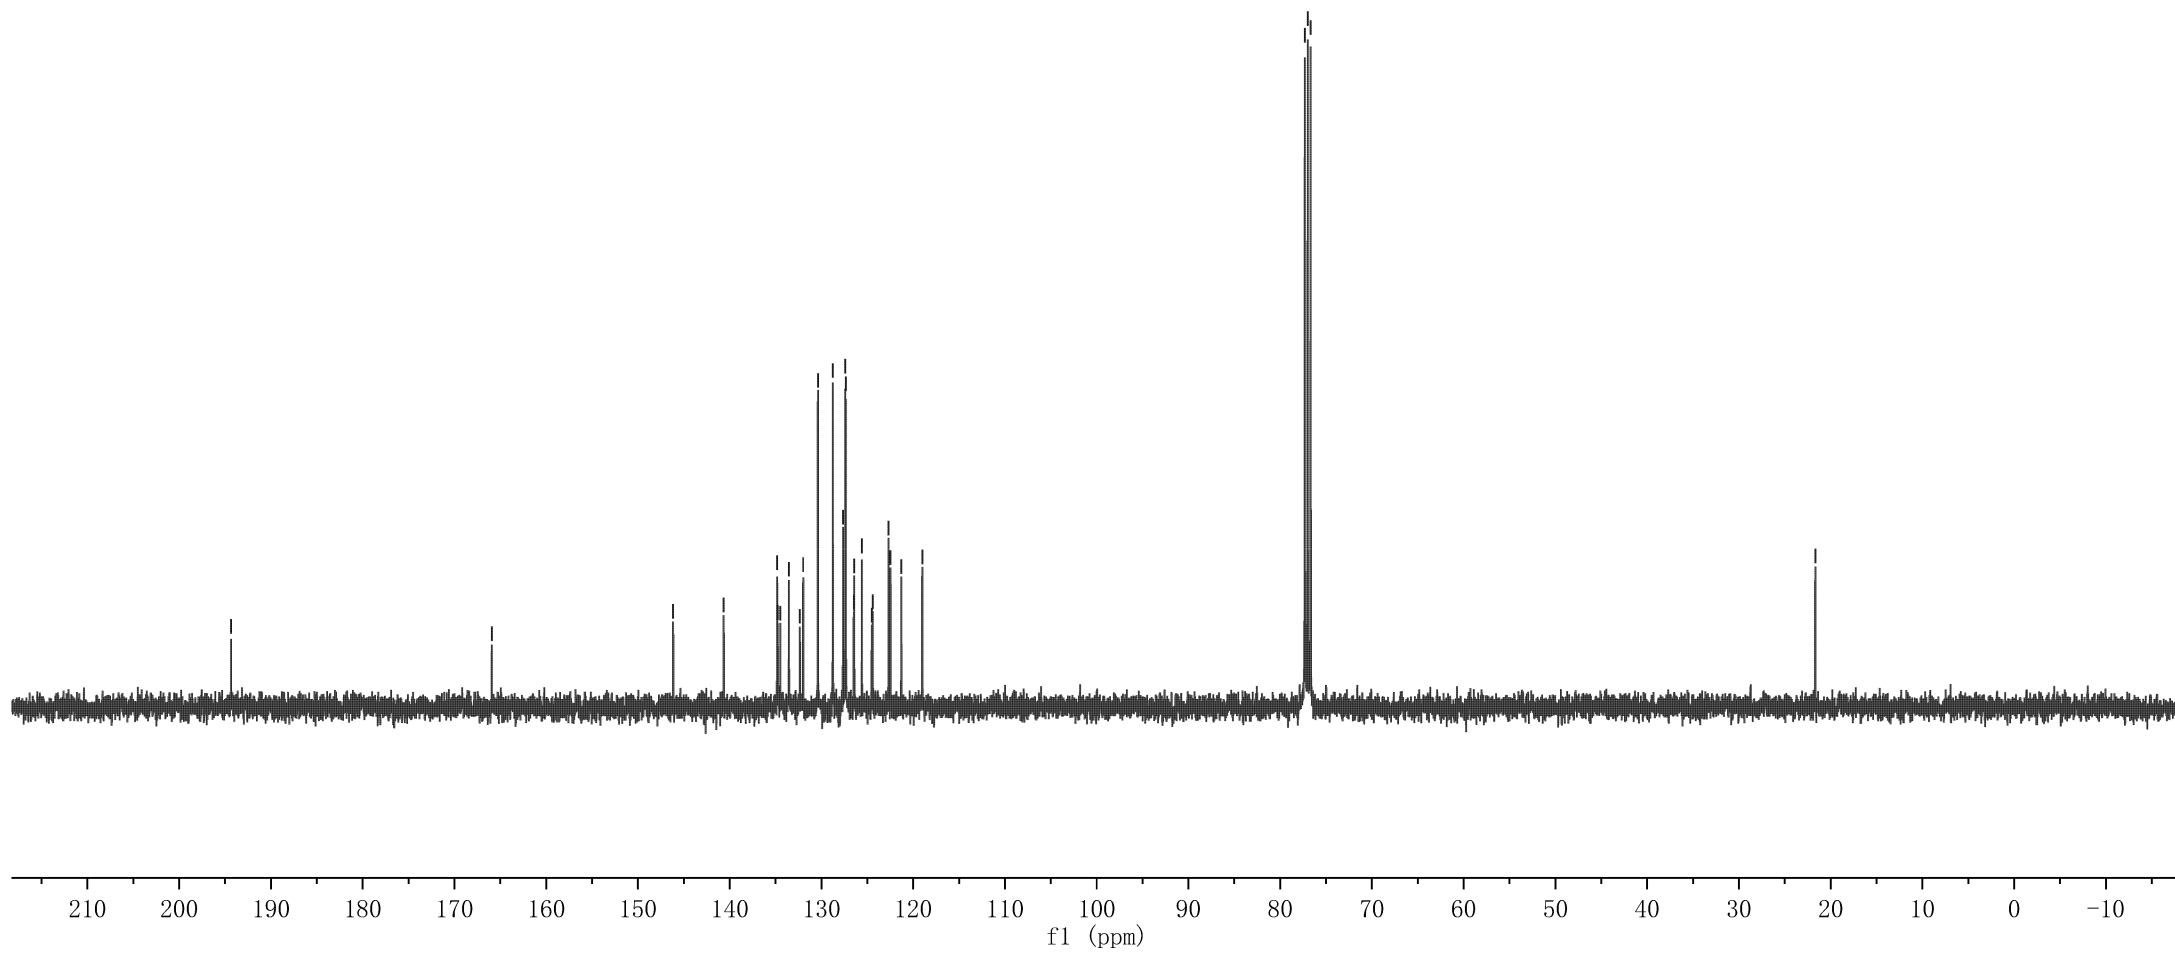

11.662

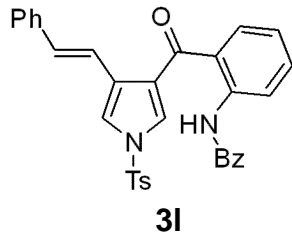

8.810  
8.789  
8.022  
7.845  
7.810  
7.790  
7.678  
7.659  
7.639  
7.534  
7.512  
7.493  
7.471  
7.443  
7.407  
7.357  
7.338  
7.319  
7.294  
7.258  
7.210  
7.191  
7.172  
6.967  
6.925

2.408

0.000

<sup>1</sup>H NMR (400 MHz, CDCl<sub>3</sub>) spectra of **31**

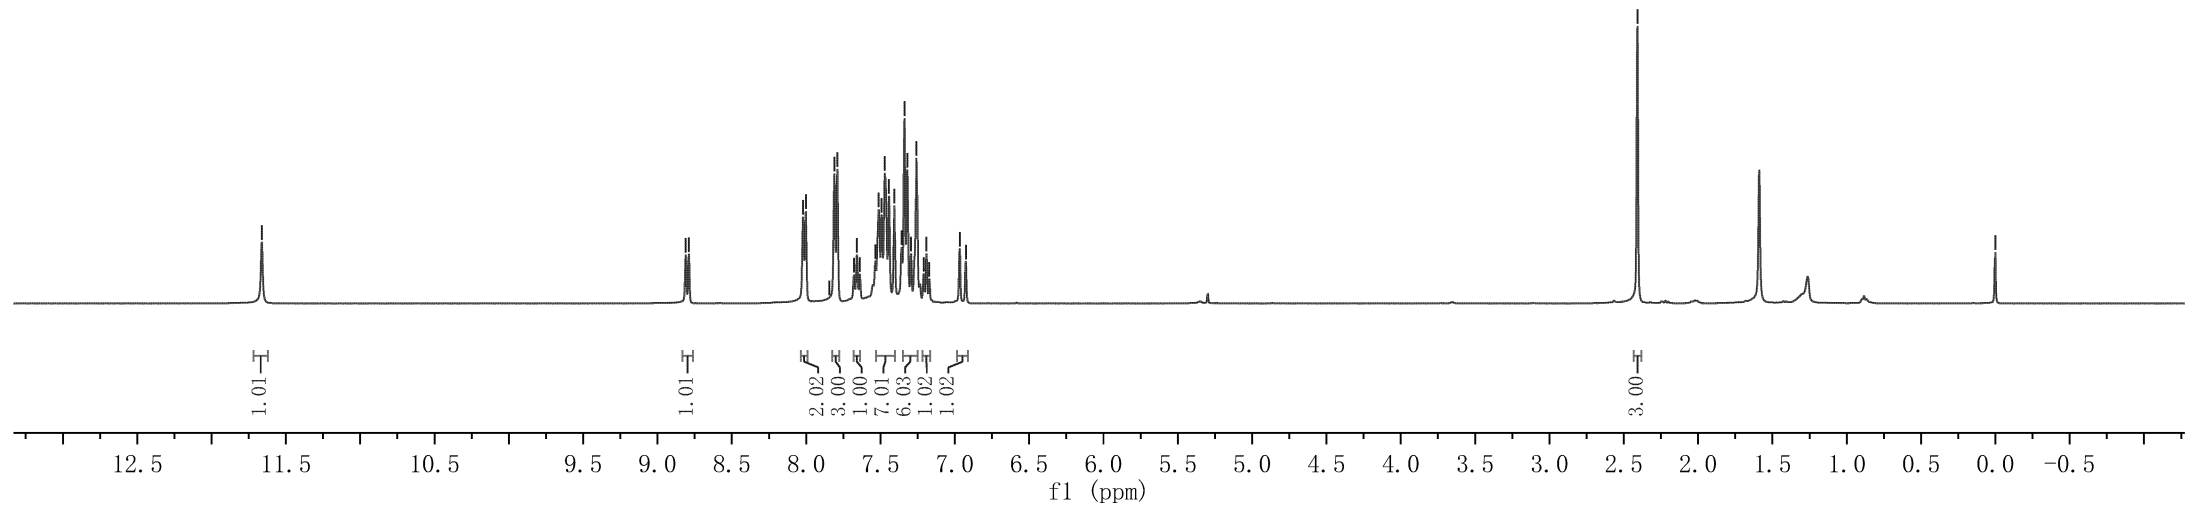

193.87

165.89

146.21

140.17

136.98

134.70

134.49

134.42

132.83

132.00

130.57

130.42

128.79

128.64

127.78

127.50

127.39

127.35

127.21

126.54

126.31

125.06

122.70

121.68

118.96

117.49

77.32

77.00

76.68

21.69

$^{13}\text{C}$  NMR (100 MHz,  $\text{CDCl}_3$ ) spectra of **31**

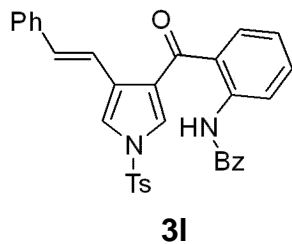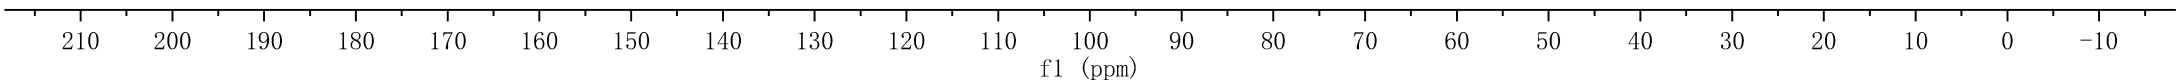

11.709

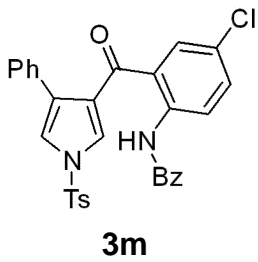

8.792  
8.770  
7.974  
7.955  
7.870  
7.852  
7.653  
7.620  
7.589  
7.554  
7.525  
7.507  
7.480  
7.463  
7.442  
7.380  
7.360  
7.298  
7.293  
7.261  
7.239  
7.220

2.439

0.000

<sup>1</sup>H NMR (400 MHz, CDCl<sub>3</sub>) spectra of **3m**

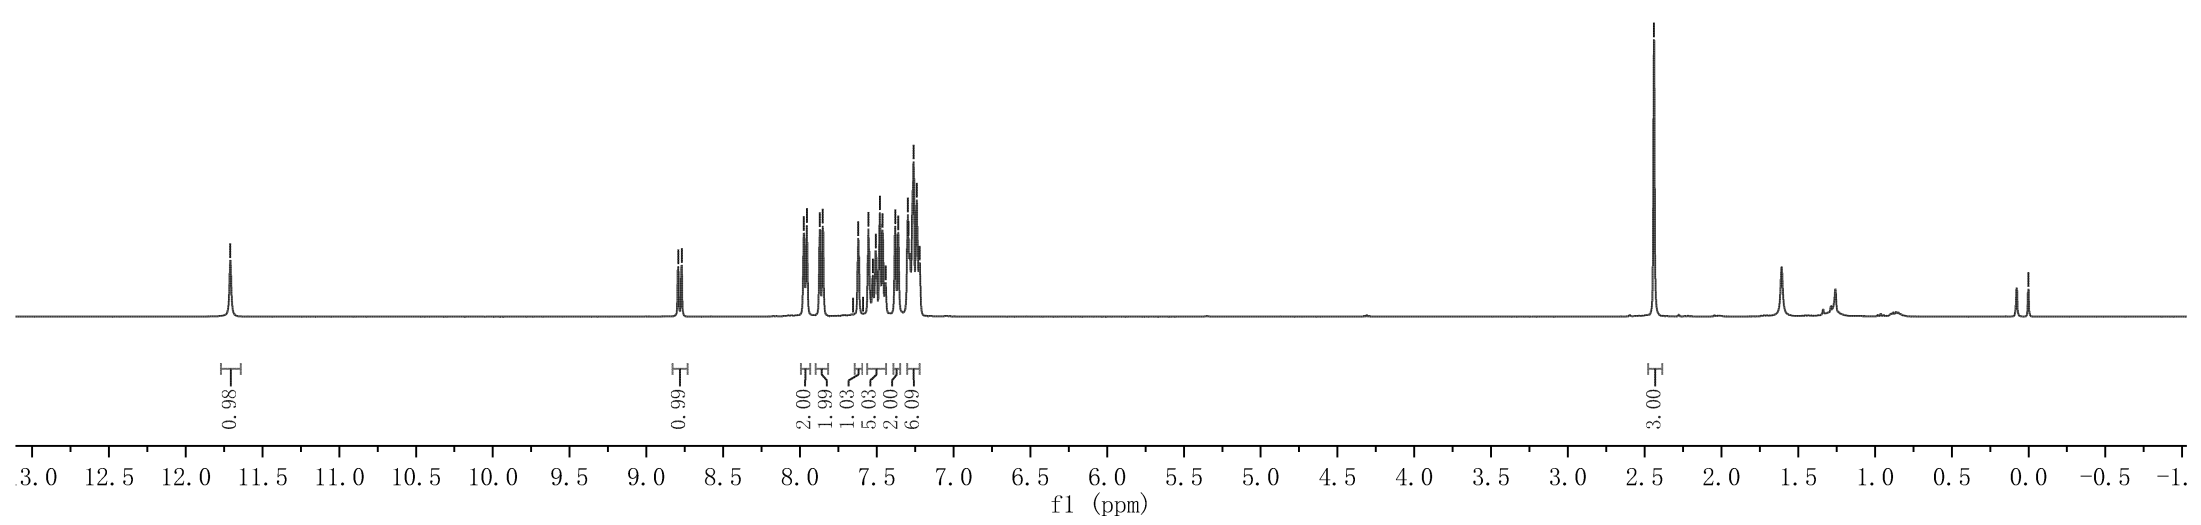

— 193.09

— 165.84

— 146.28

— 139.15

— 134.81

— 134.33

— 134.15

— 132.78

— 132.16

— 132.02

— 130.49

— 130.00

— 128.80

— 128.53

— 128.18

— 127.62

— 127.40

— 126.41

— 126.15

— 125.18

— 122.61

— 119.28

— 77.32

— 77.00

— 76.68

— 21.72

<sup>13</sup>C NMR (100 MHz, CDCl<sub>3</sub>) spectra of **3m**

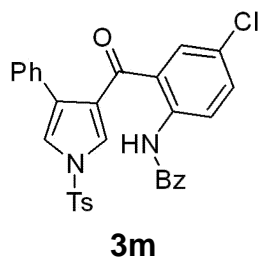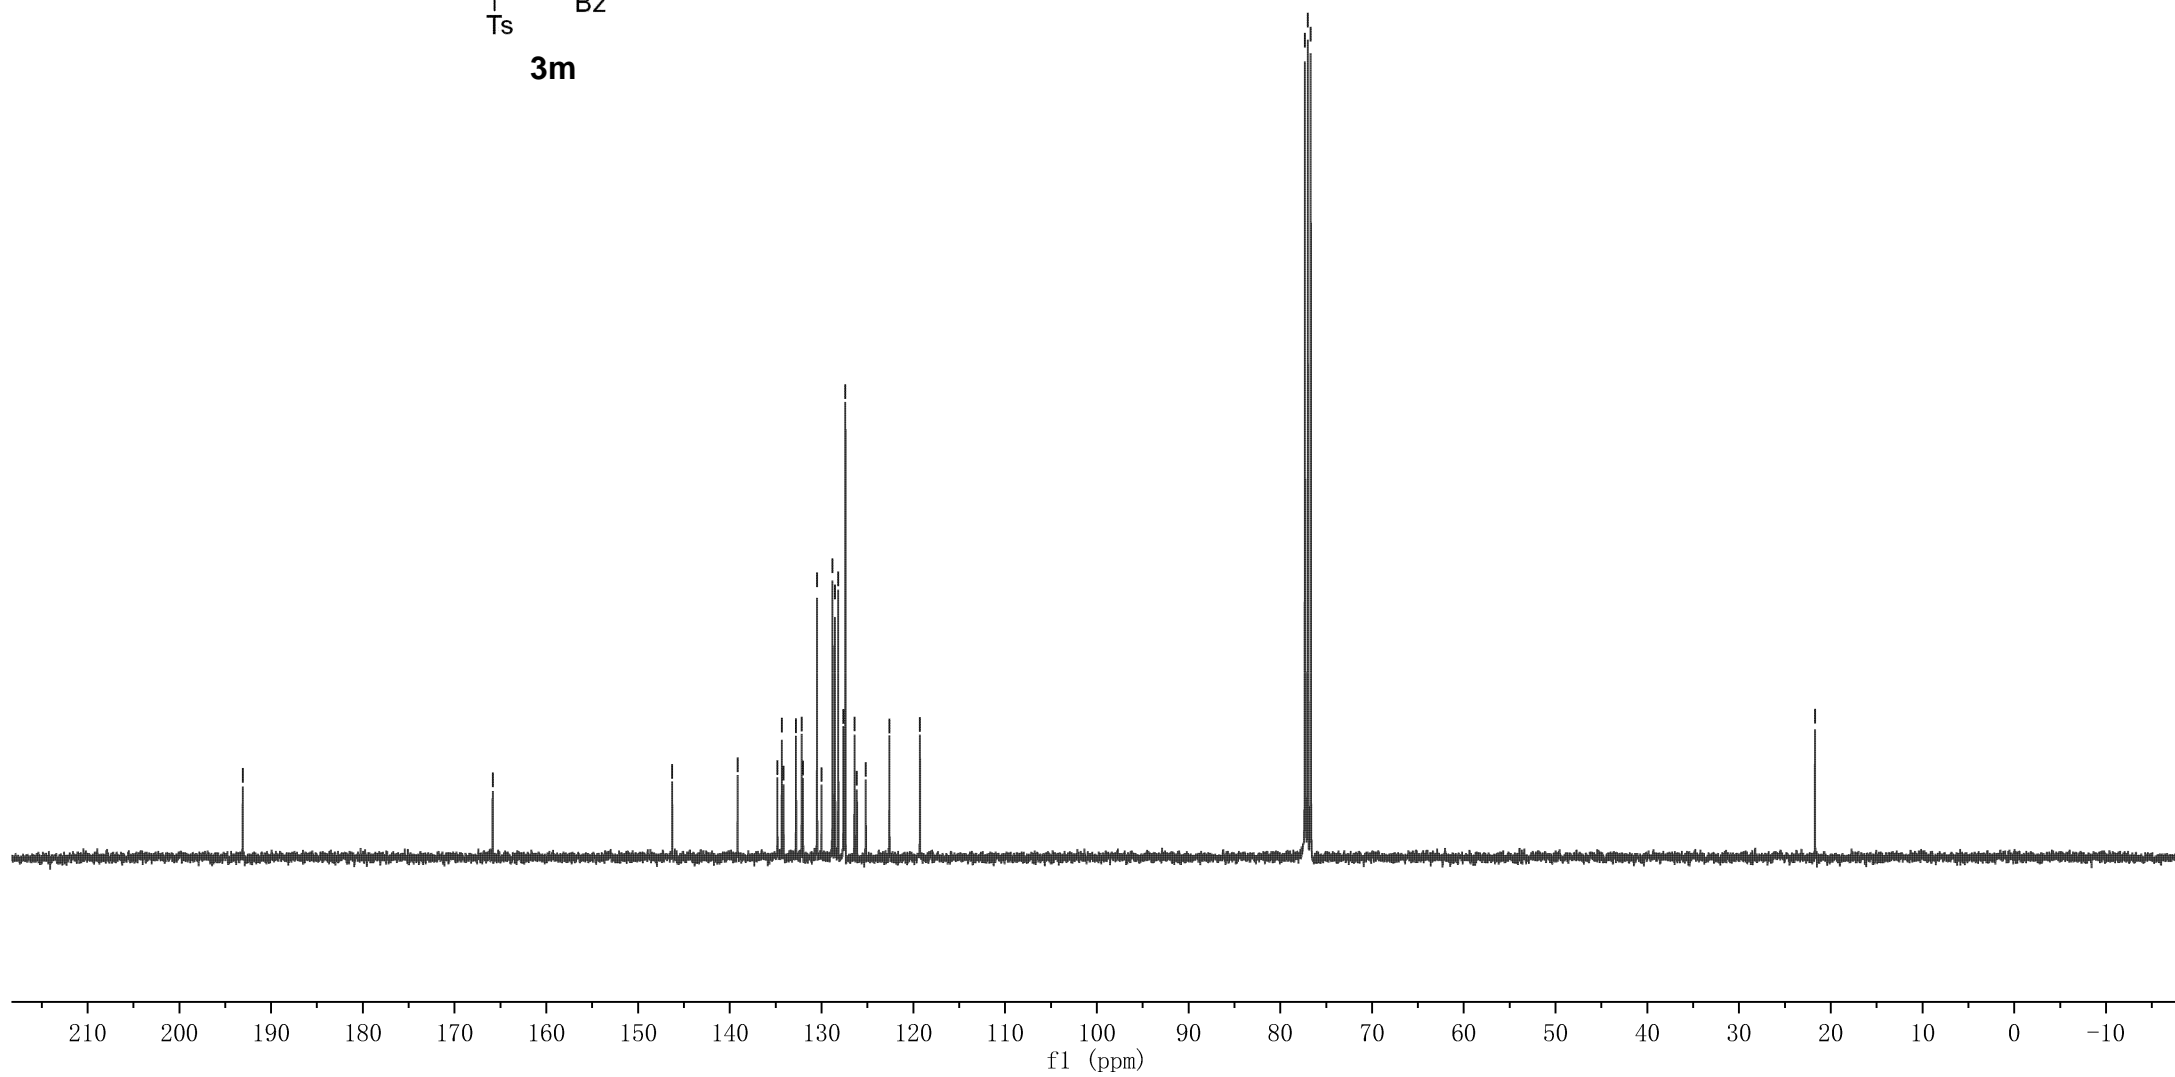



11.728

8.739  
8.716  
7.974  
7.956  
7.873  
7.856  
7.788  
7.754  
7.727  
7.632  
7.609  
7.564  
7.524  
7.507  
7.477  
7.461  
7.444  
7.381  
7.363  
7.297  
7.260  
7.235  
7.219

2.437

0.000

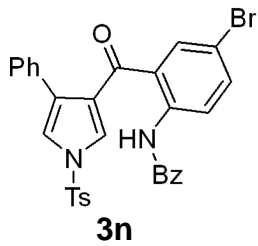

<sup>1</sup>H NMR (400 MHz, CDCl<sub>3</sub>) spectra of **3n**

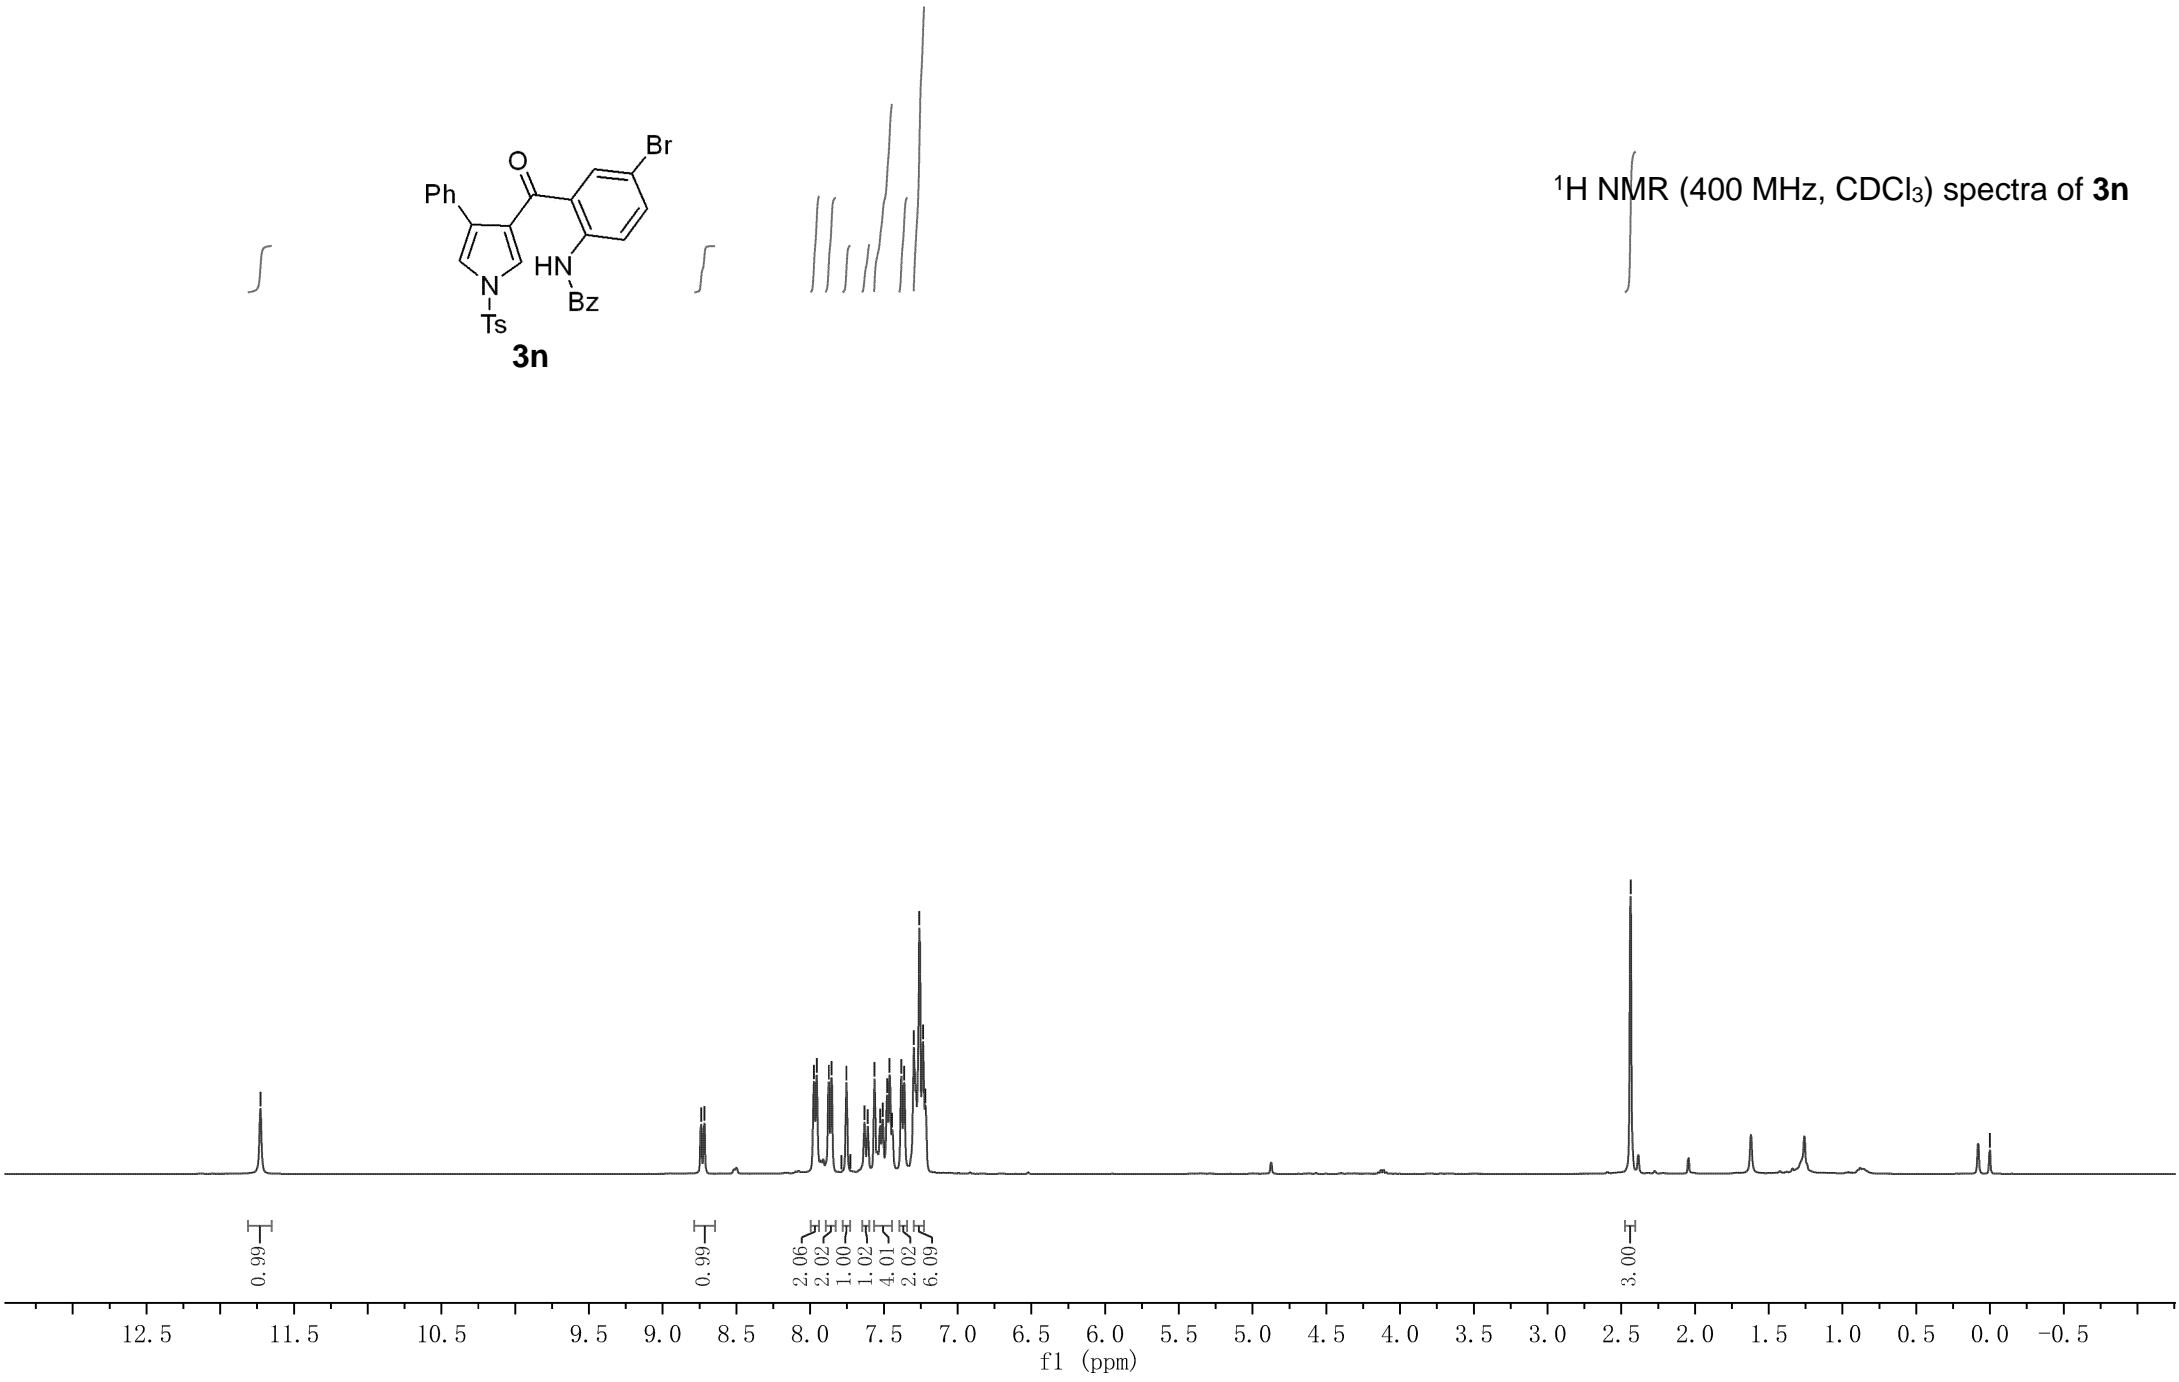

192.97

165.81

146.26

139.61

137.21

135.73

134.79

134.12

132.17

131.99

130.49

129.99

128.79

128.53

128.18

127.60

127.39

126.44

126.13

125.41

122.79

119.25

114.69

77.32

77.00

76.68

21.72

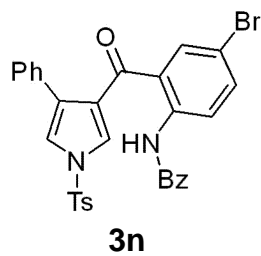

<sup>13</sup>C NMR (100 MHz, CDCl<sub>3</sub>) spectra of **3n**

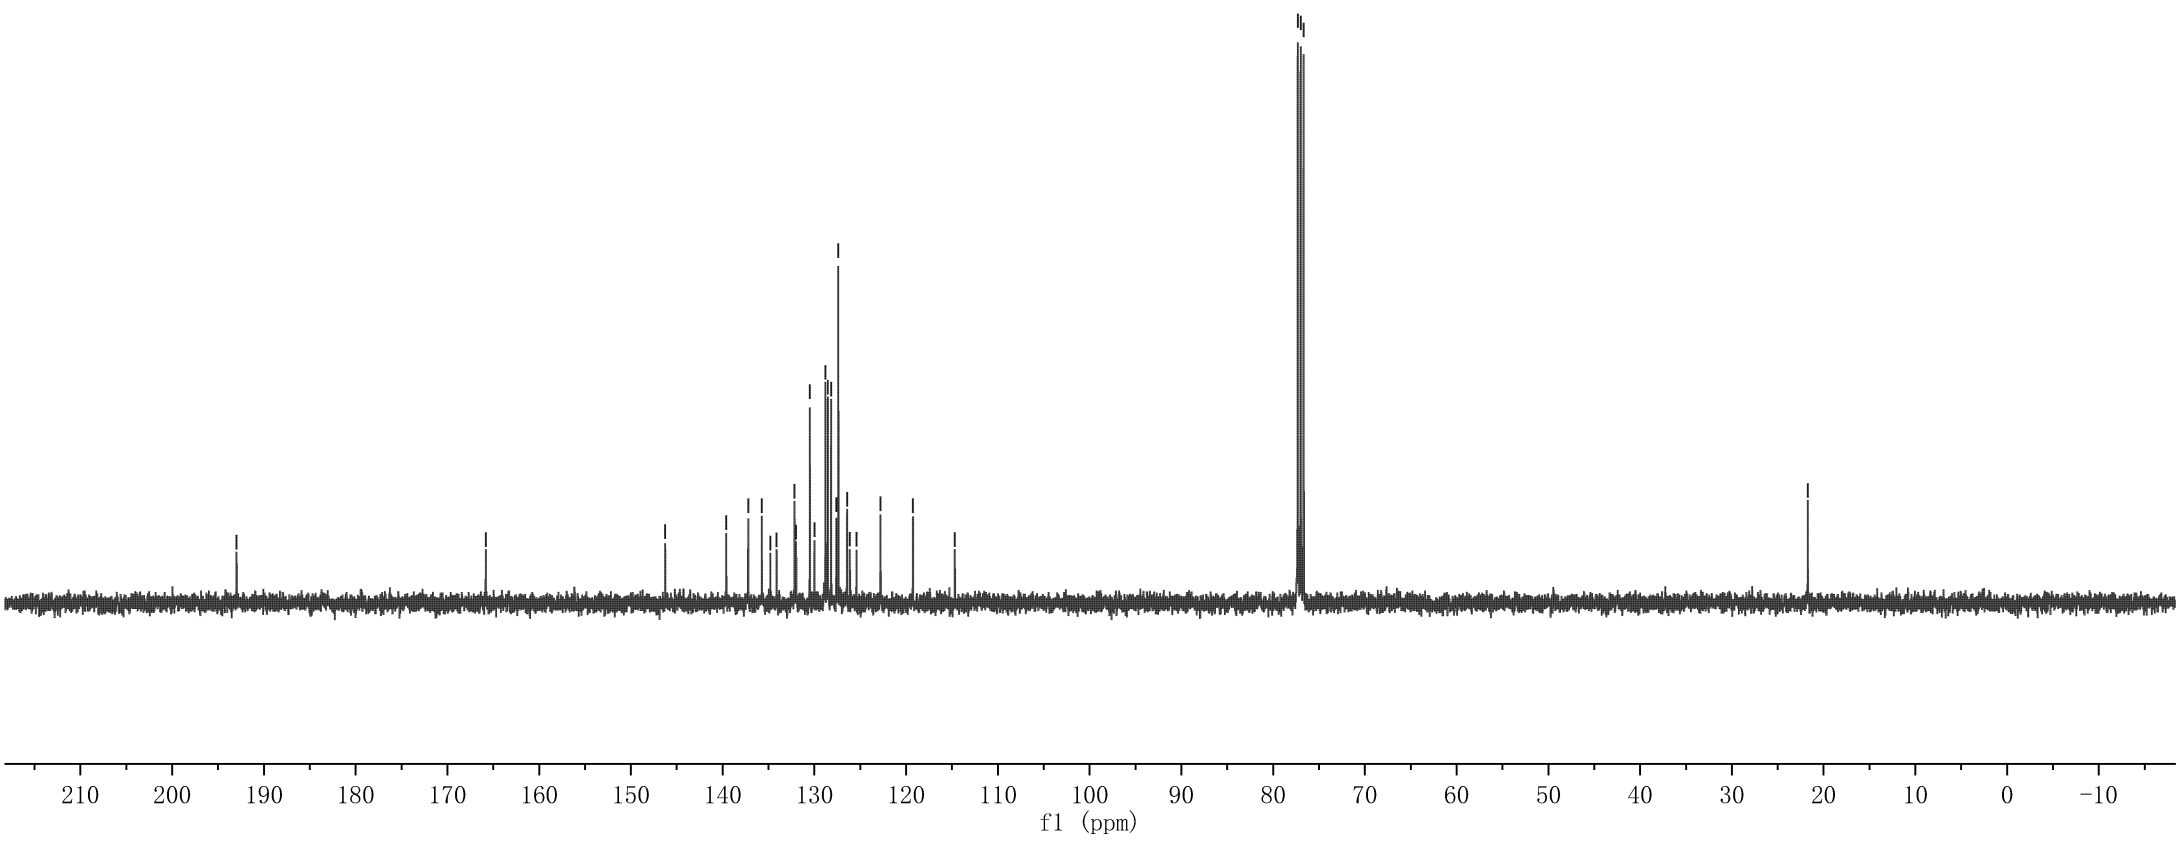

11.754

8.695  
8.674

7.985  
7.965  
7.852  
7.834  
7.505  
7.499  
7.467  
7.450  
7.432  
7.390  
7.364  
7.344  
7.299  
7.265  
7.262

2.435  
2.241

0.000

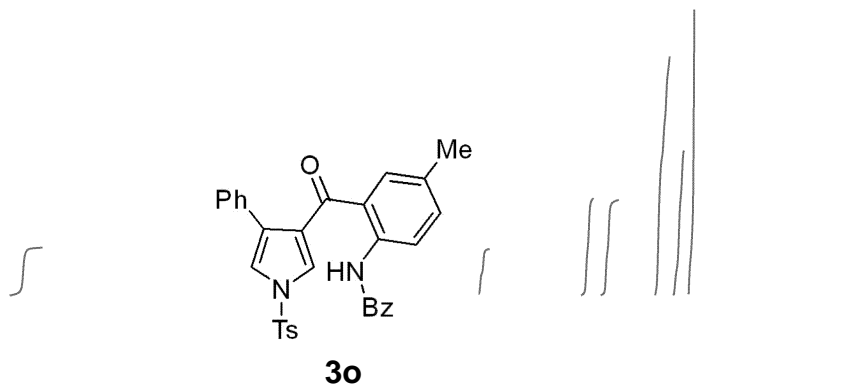

<sup>1</sup>H NMR (400 MHz, CDCl<sub>3</sub>) spectra of **3o**

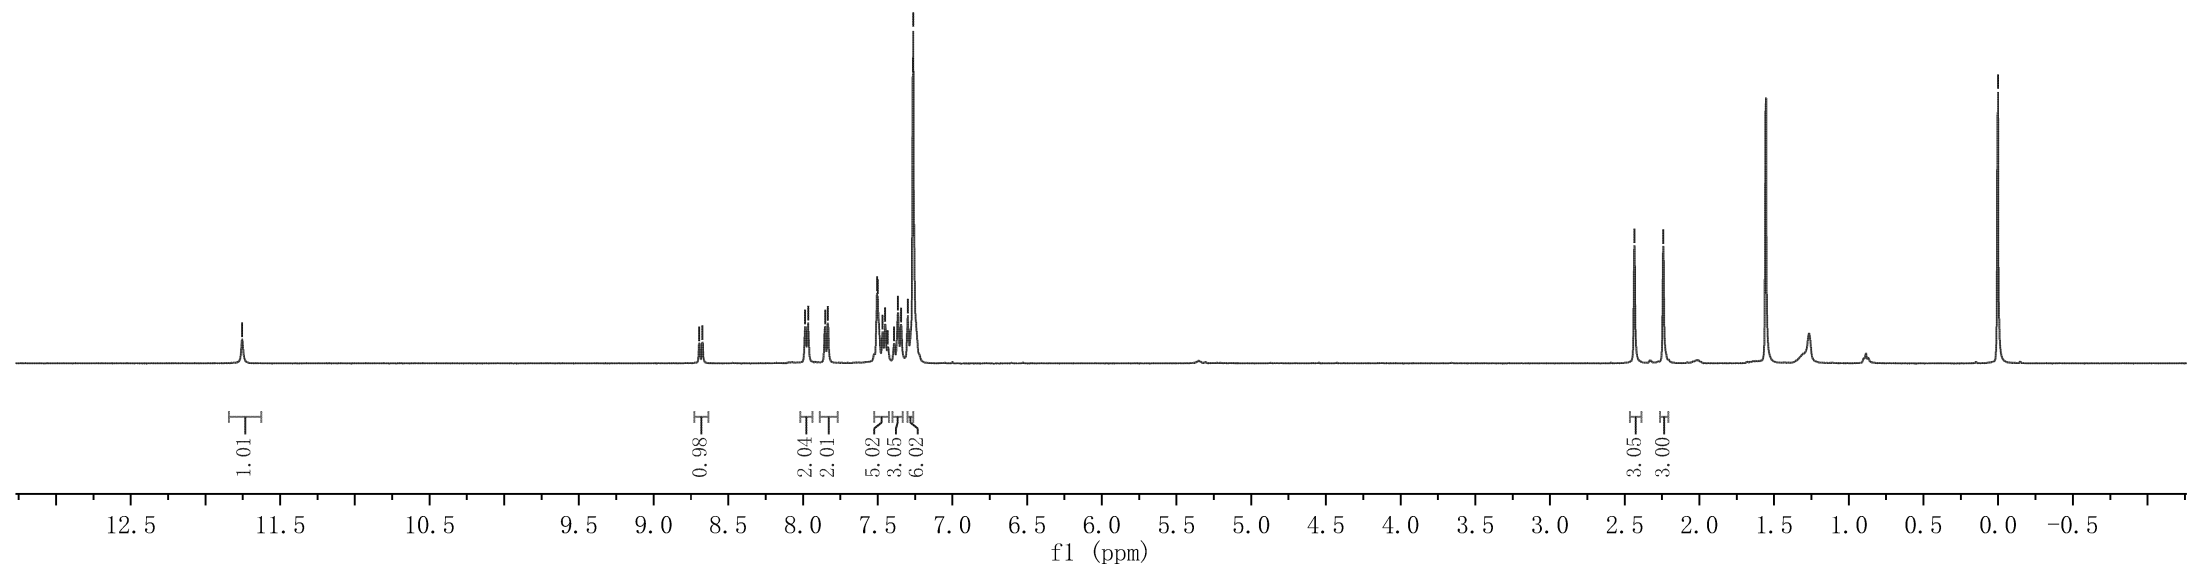

194.39

165.83

146.15

138.31

135.46

134.95

134.63

133.87

132.31

131.97

131.85

130.41

130.03

128.71

128.47

128.13

127.48

127.40

126.84

126.09

124.06

121.16

119.00

77.32

77.00

76.68

21.71

20.65

$^{13}\text{C}$  NMR (100 MHz,  $\text{CDCl}_3$ ) spectra of **3o**

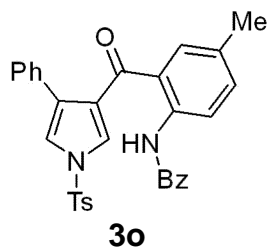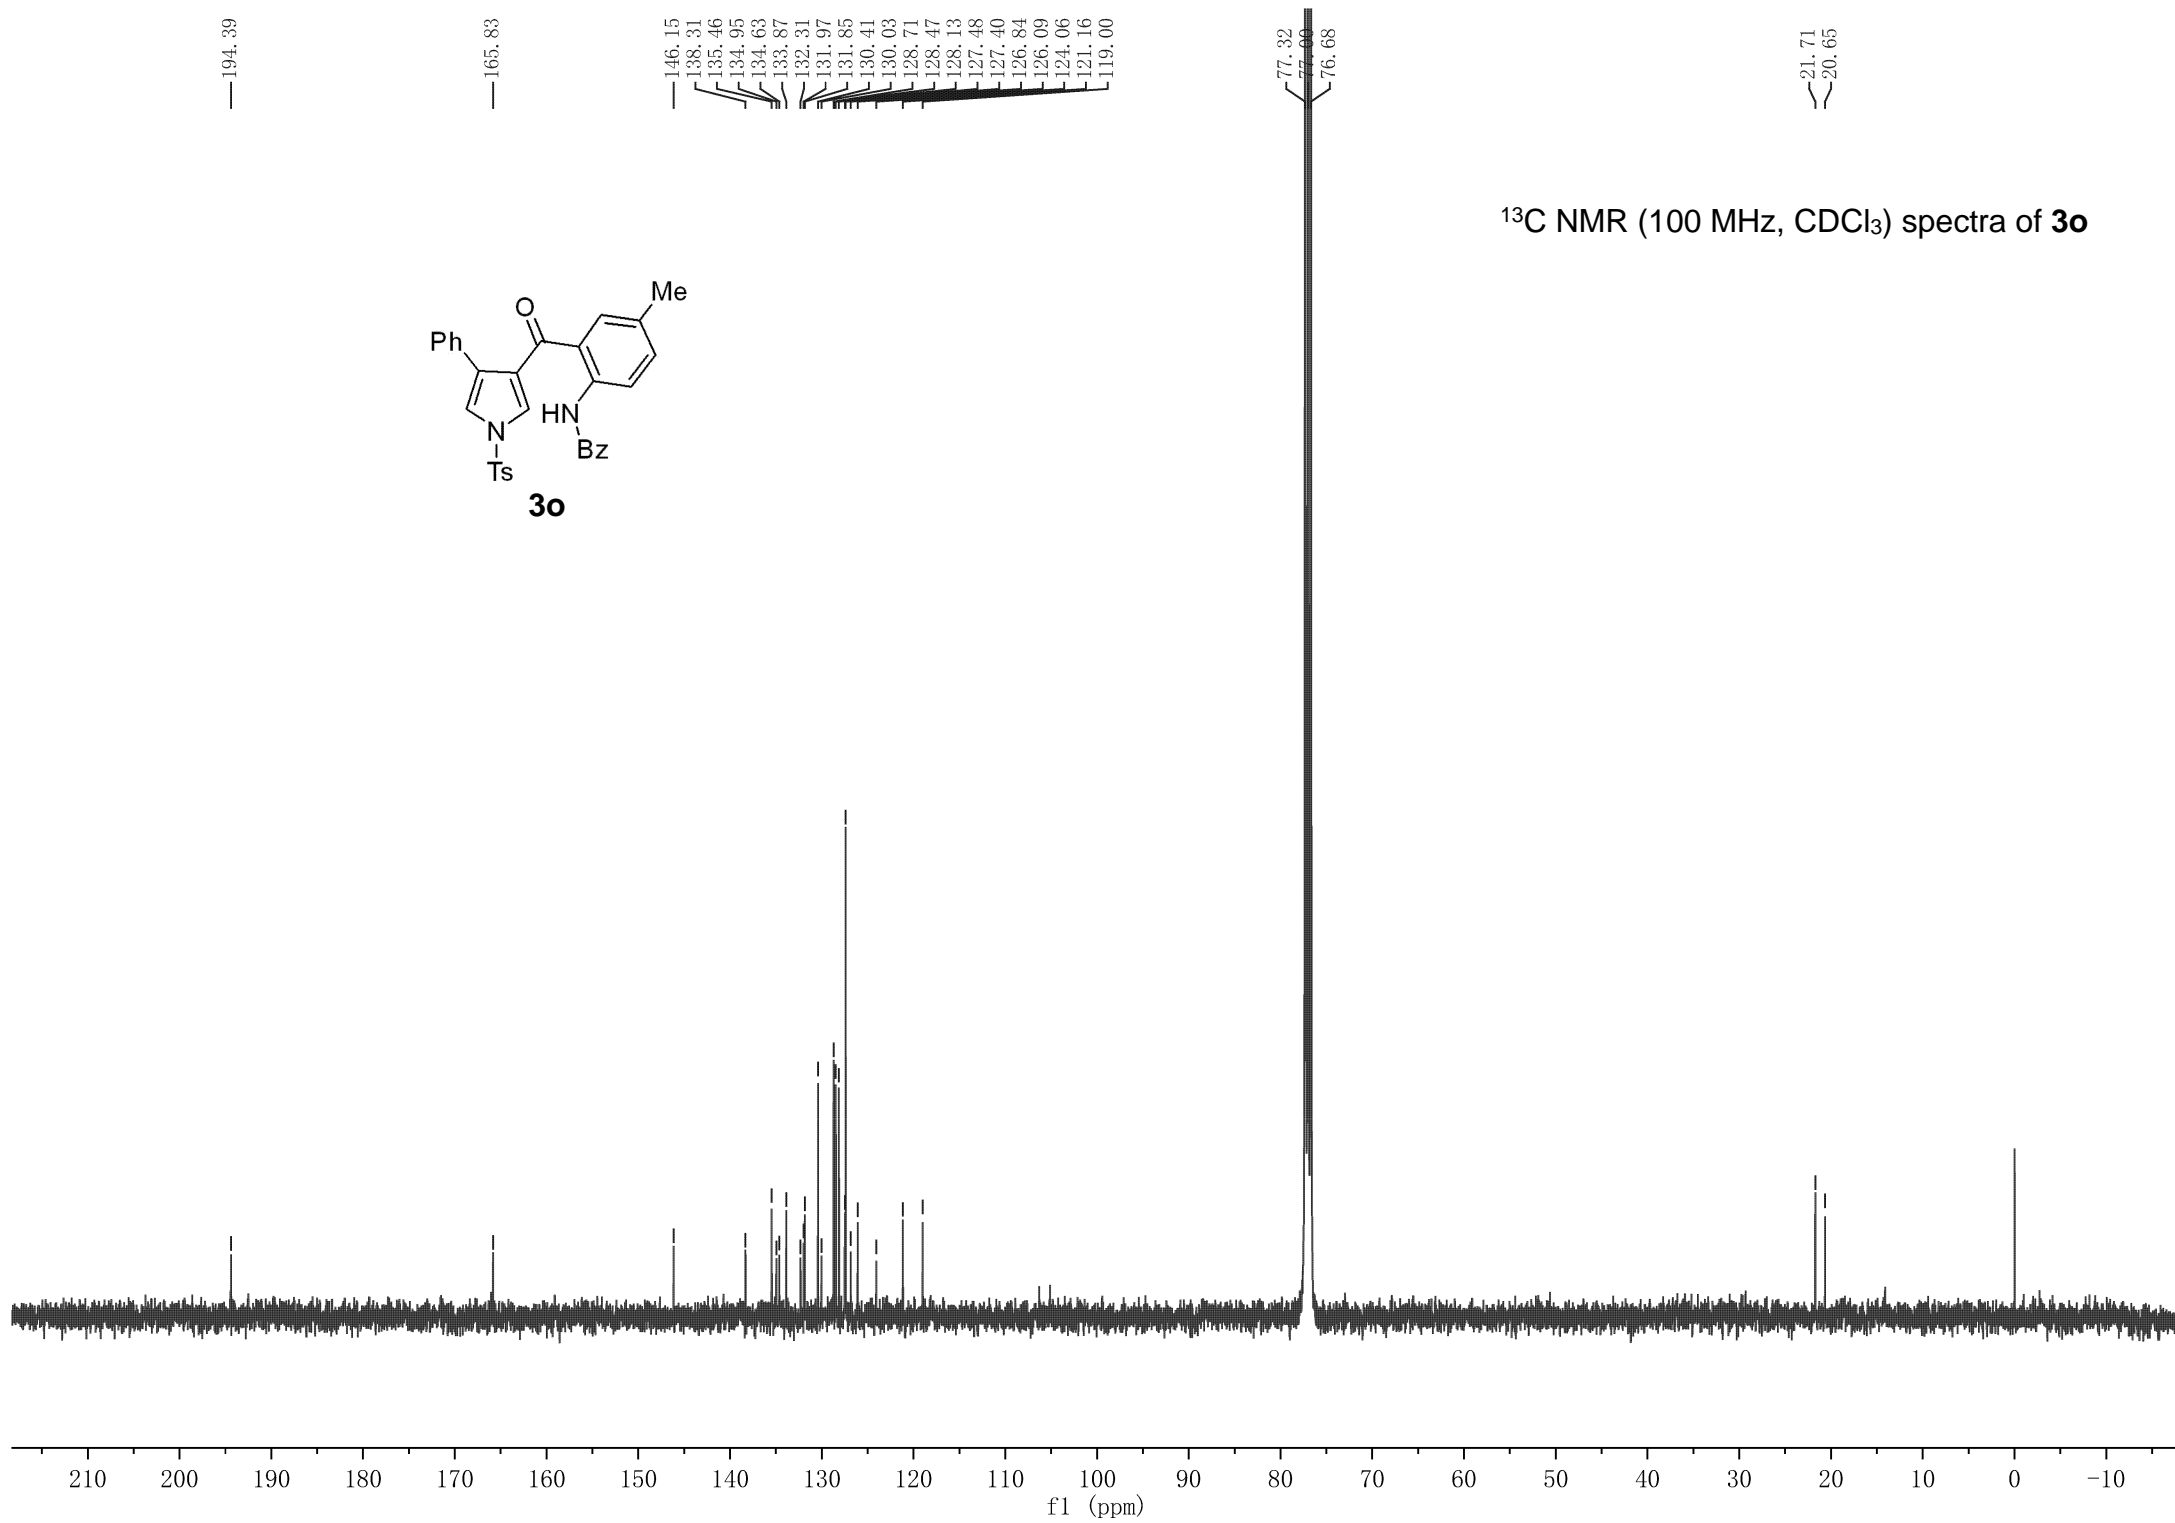

11.868

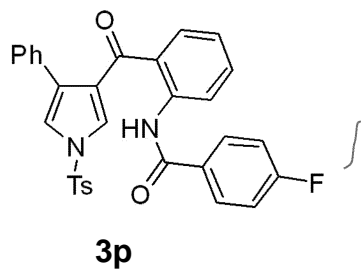

8.795  
8.774  
8.008  
7.994  
7.978  
7.846  
7.829  
7.797  
7.778  
7.616  
7.596  
7.576  
7.504  
7.479  
7.457  
7.361  
7.342  
7.302  
7.296  
7.277  
7.263  
7.258  
7.140  
7.123  
7.102  
7.085  
7.065  
7.047

2.434

0.000

<sup>1</sup>H NMR (400 MHz, CDCl<sub>3</sub>) spectra of **3p**

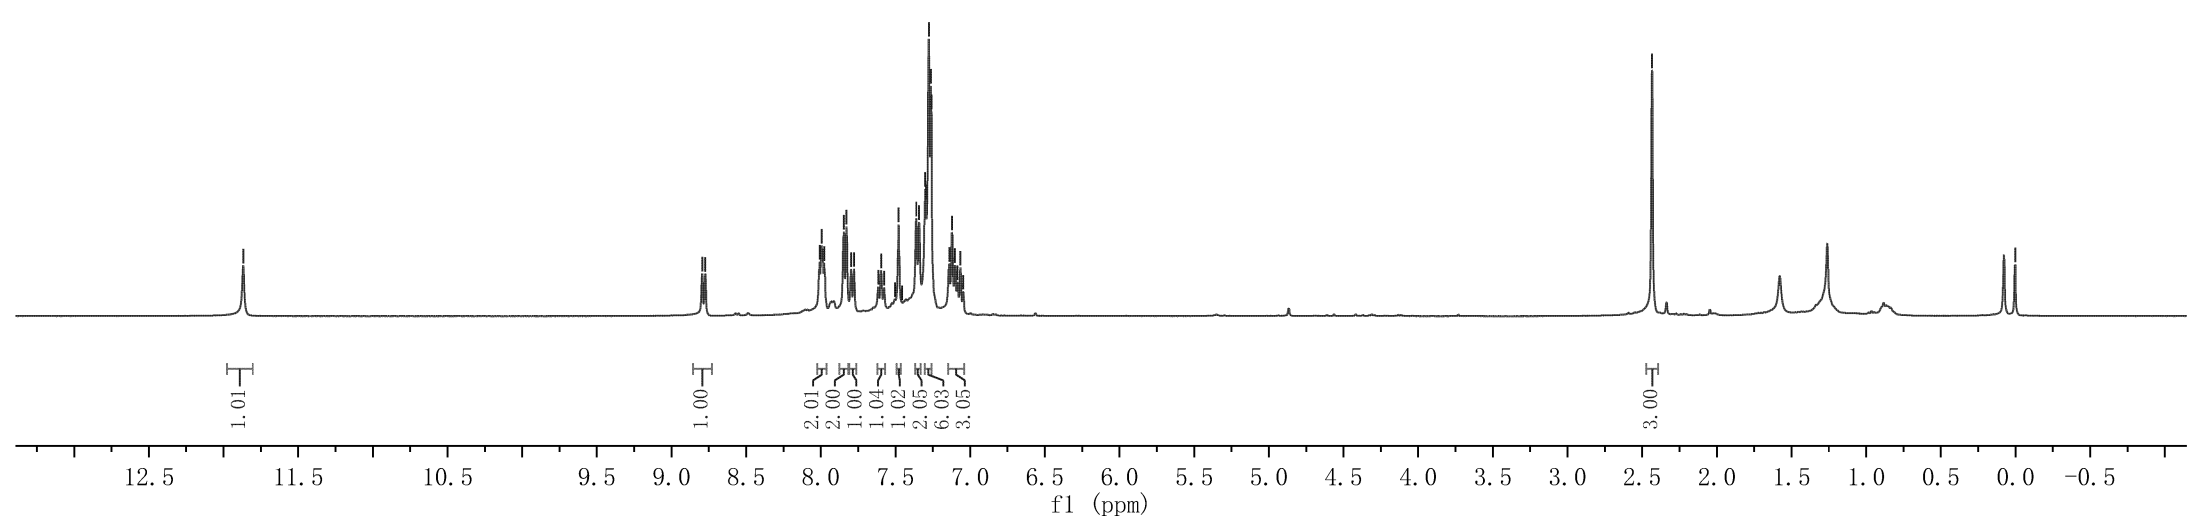

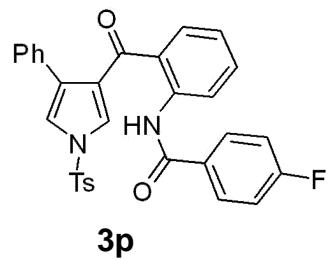

<sup>13</sup>C NMR (100 MHz, CDCl<sub>3</sub>) spectra of **3p**

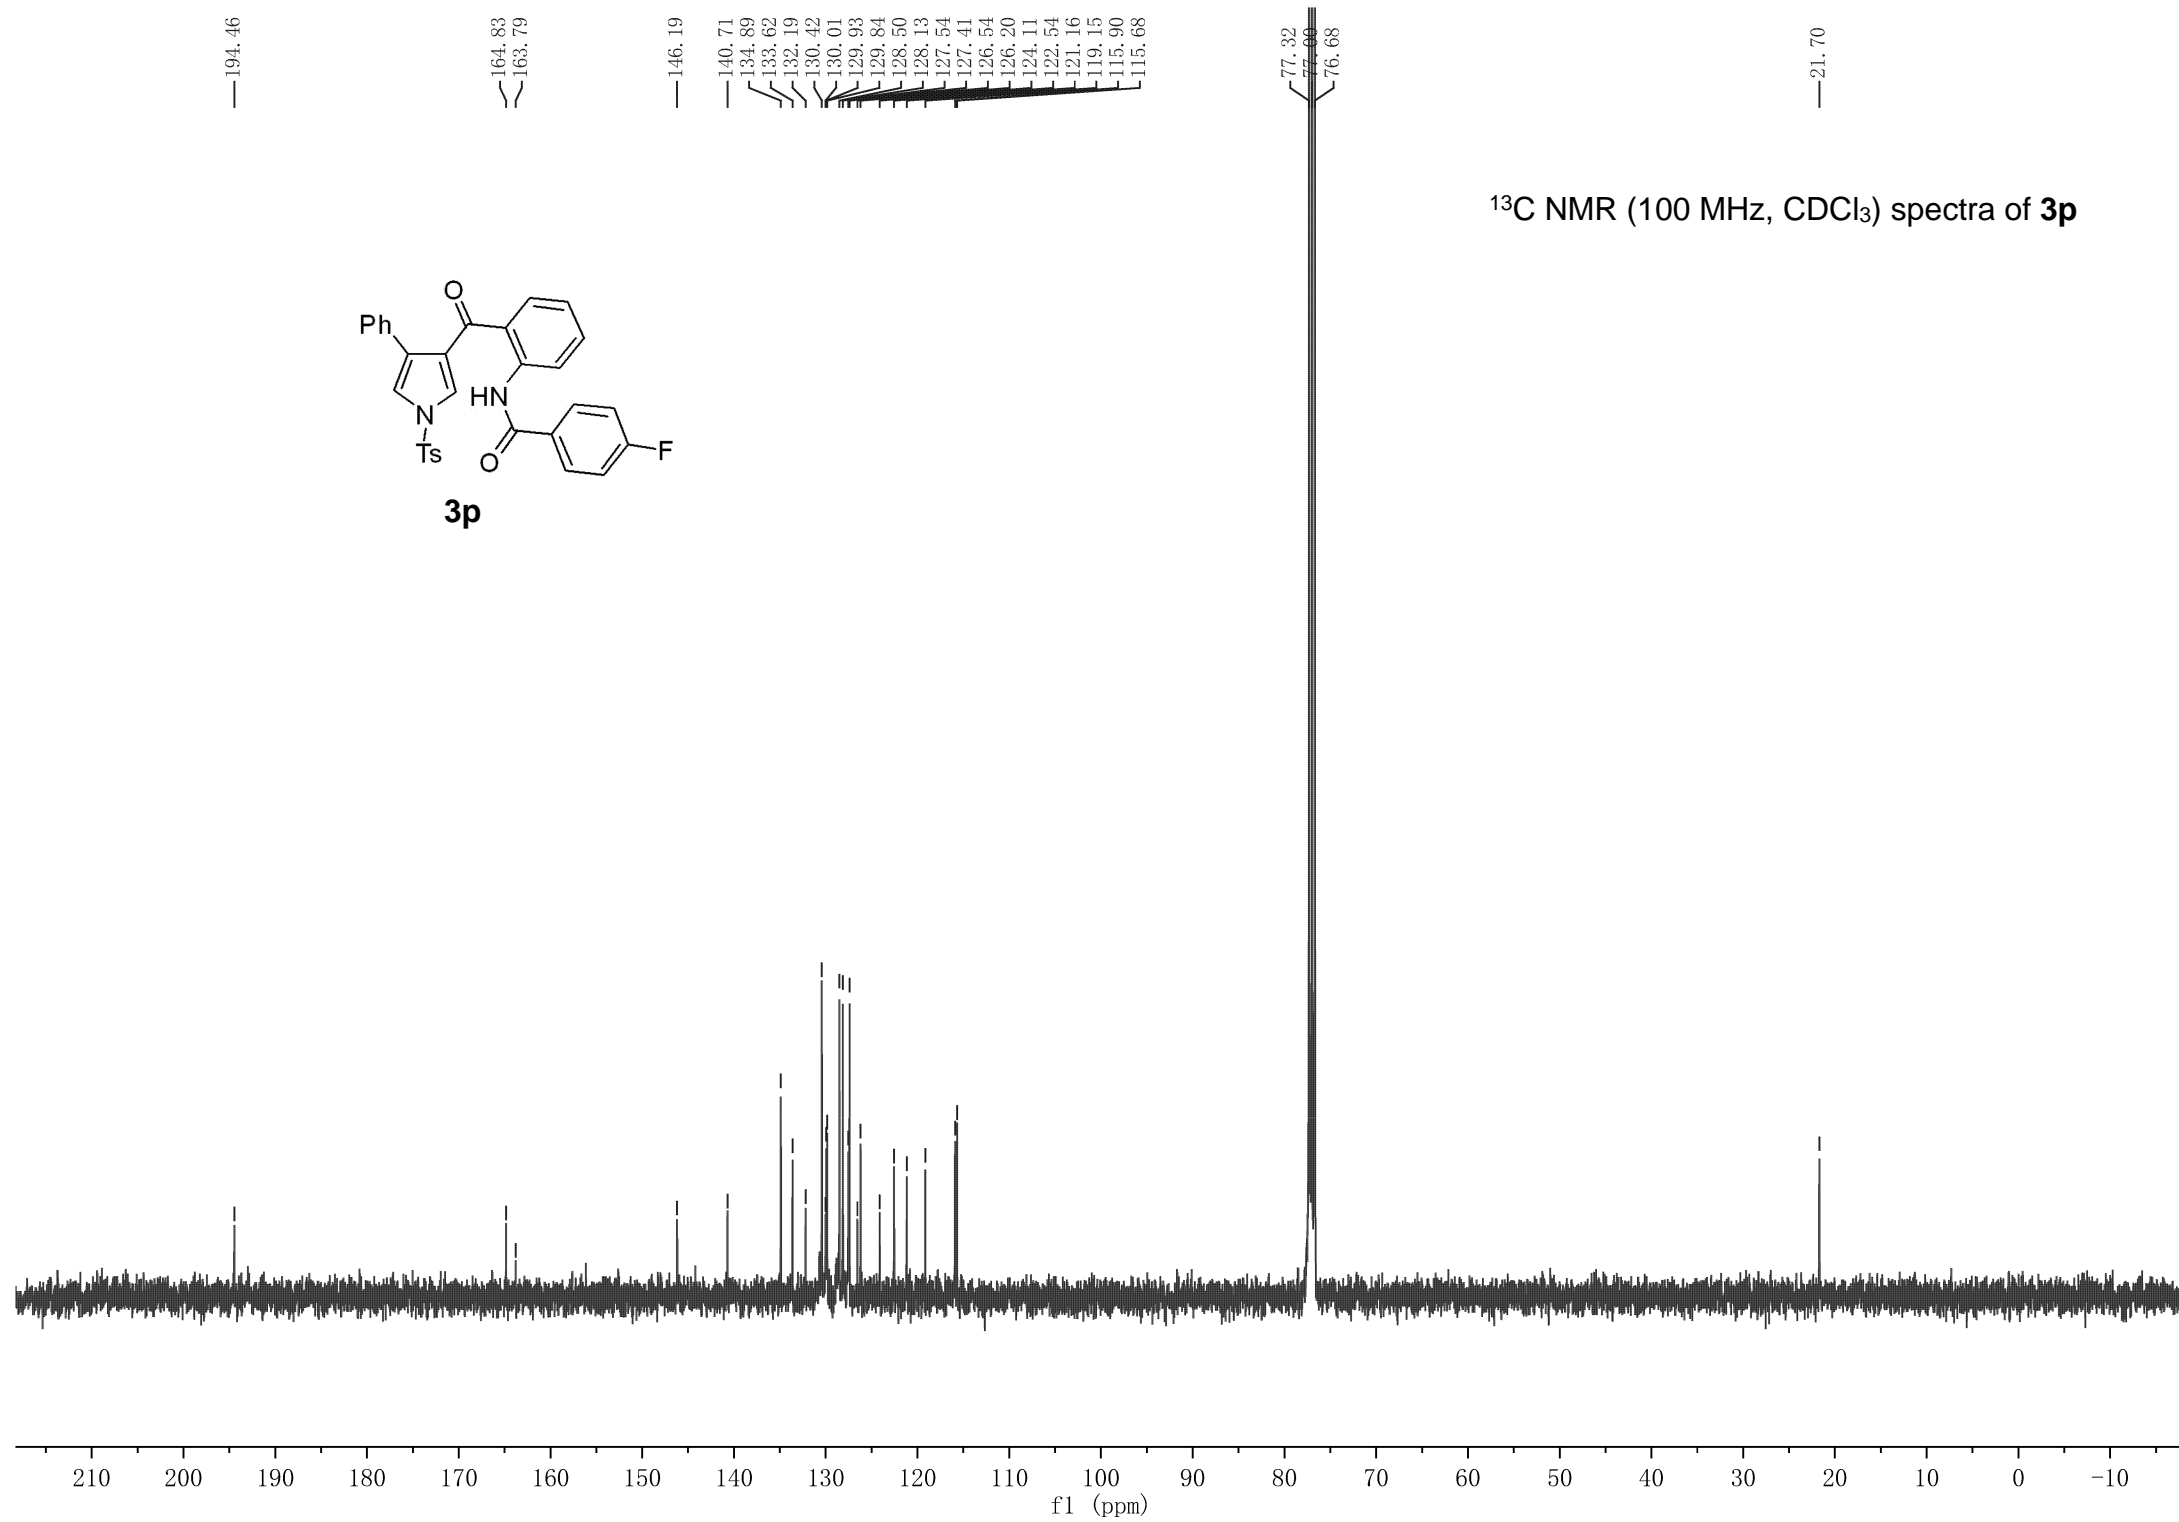

11.898

8.794  
8.773  
7.922  
7.907  
7.845  
7.830  
7.805  
7.786  
7.615  
7.597  
7.578  
7.516  
7.483  
7.478  
7.421  
7.406  
7.358  
7.339  
7.303  
7.299  
7.274  
7.263  
7.256  
7.252  
7.089  
7.071  
7.056

2.429

0.000

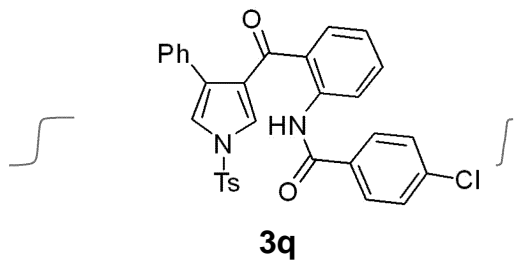

<sup>1</sup>H NMR (400 MHz, CDCl<sub>3</sub>) spectra of **3q**

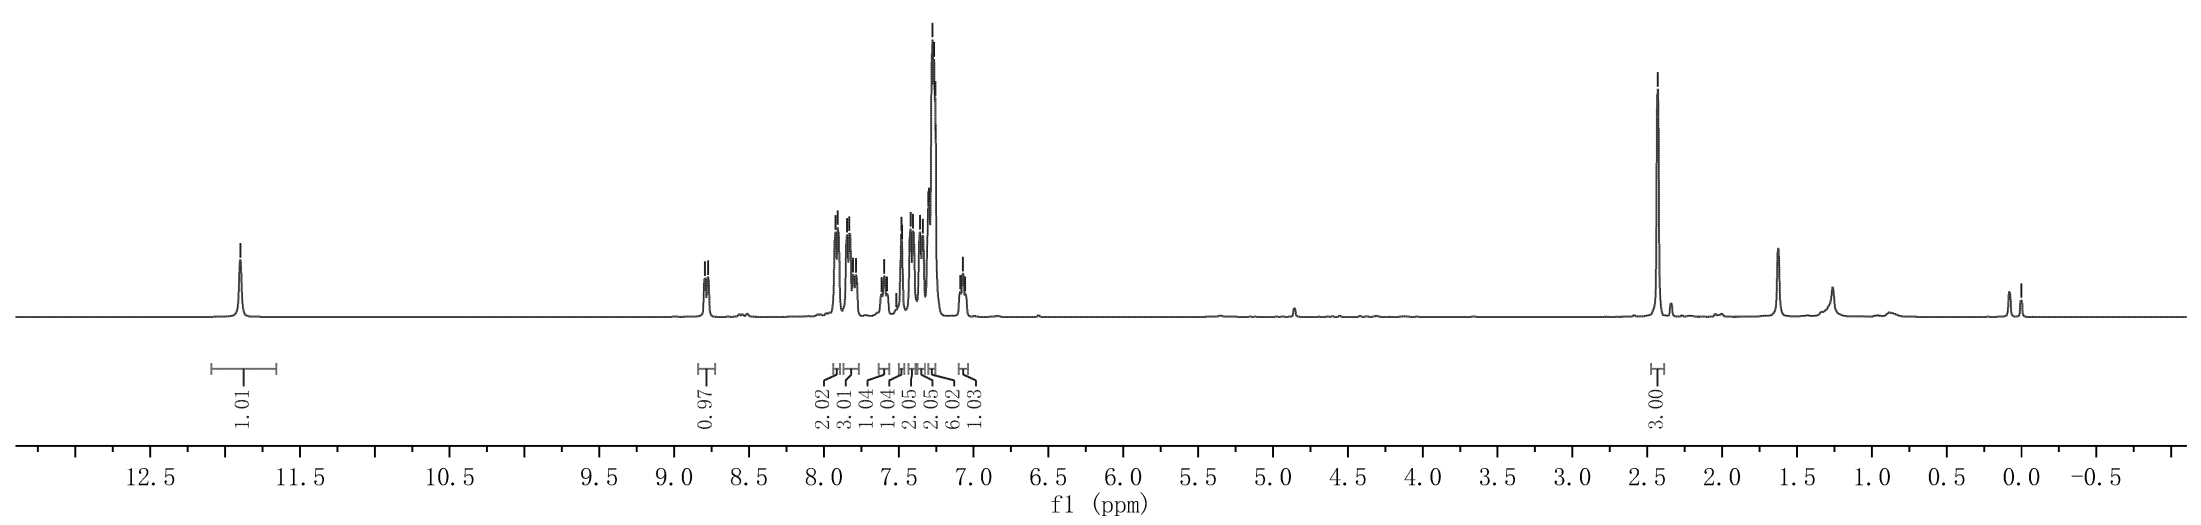

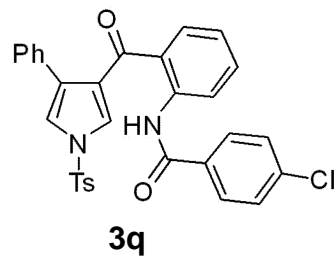

<sup>13</sup>C NMR (100 MHz, CDCl<sub>3</sub>) spectra of **3q**

194.41

164.82

146.19

140.58

138.26

134.89

134.83

133.61

132.87

132.15

130.41

130.00

128.97

128.86

128.49

128.12

127.53

127.39

126.47

126.21

124.08

122.63

121.15

119.14

77.32

77.00

76.68

21.69

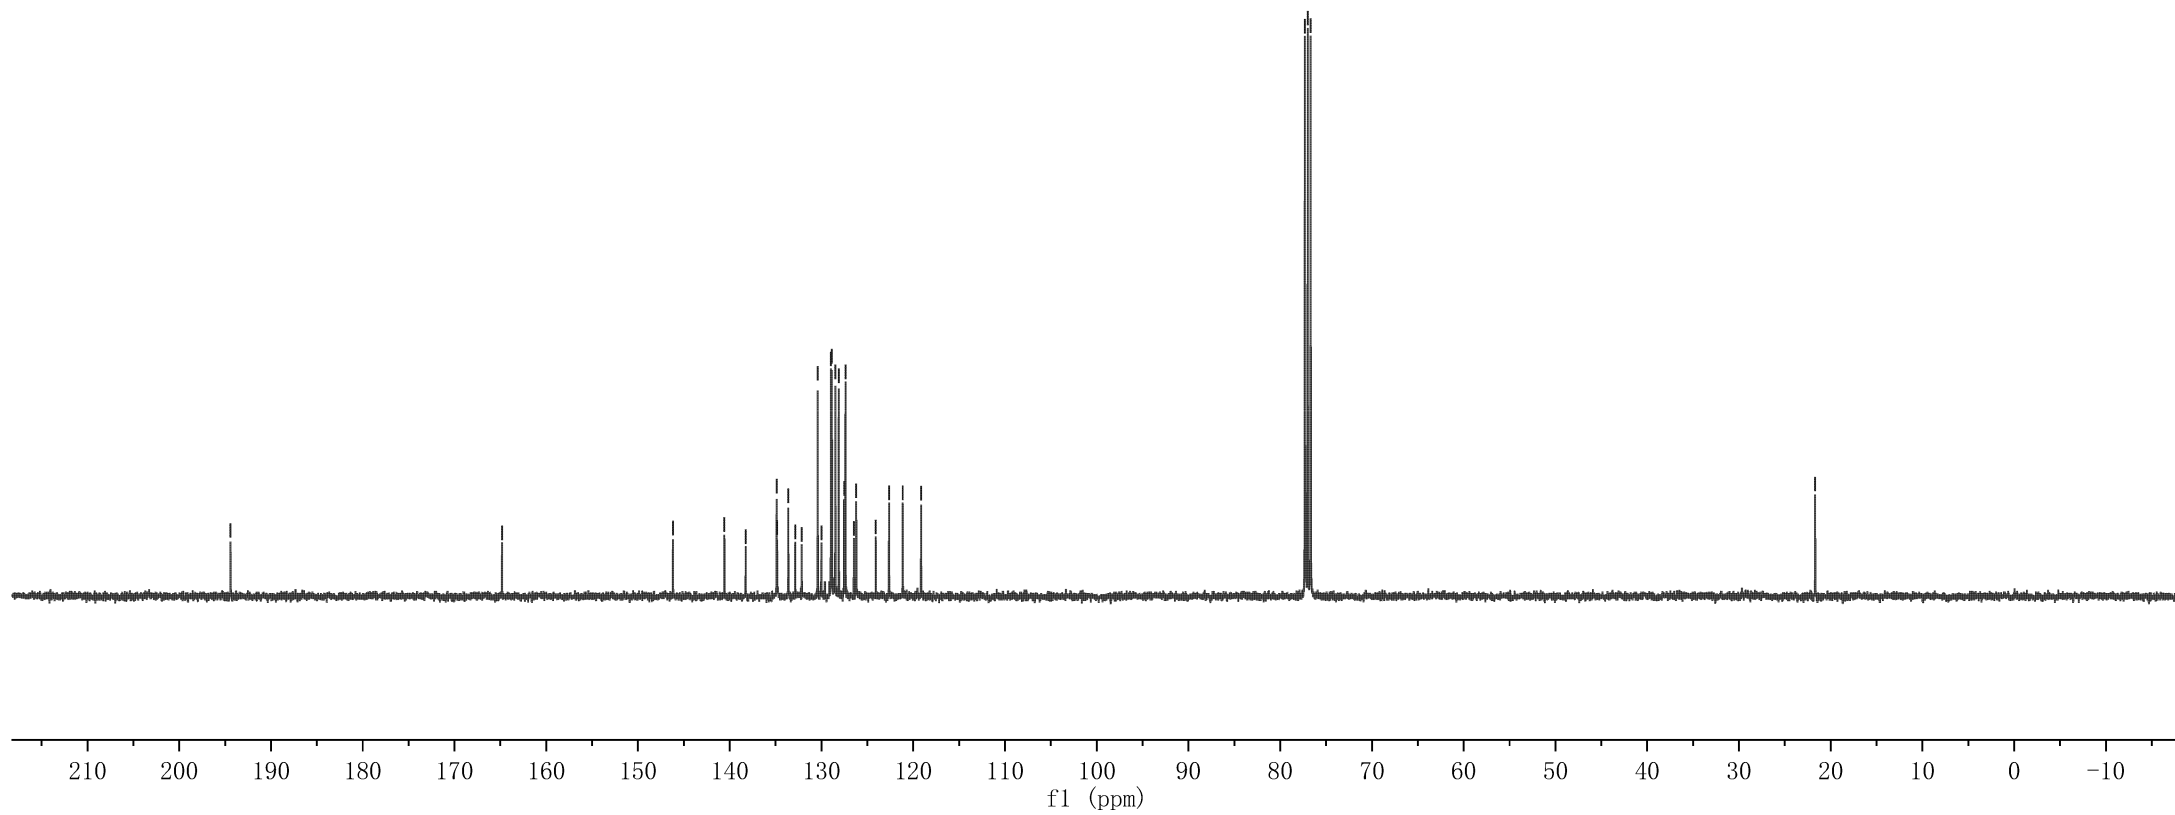



11.899

8.793  
8.772  
7.851  
7.831  
7.805  
7.785  
7.620  
7.597  
7.576  
7.499  
7.477  
7.456  
7.363  
7.345  
7.301  
7.277  
7.260  
7.093  
7.077  
7.057

2.436

0.000

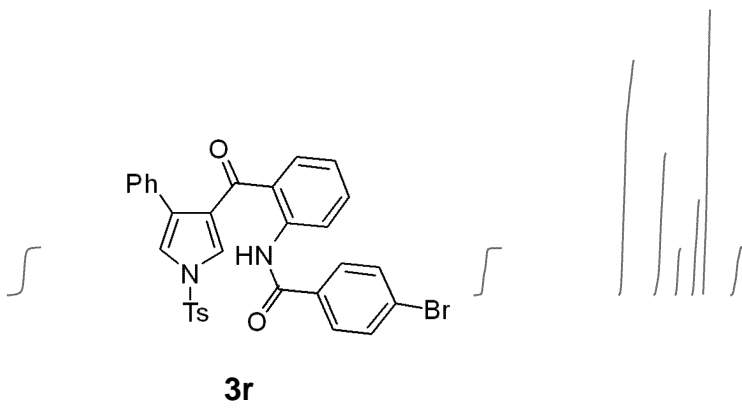

<sup>1</sup>H NMR (400 MHz, CDCl<sub>3</sub>) spectra of **3r**

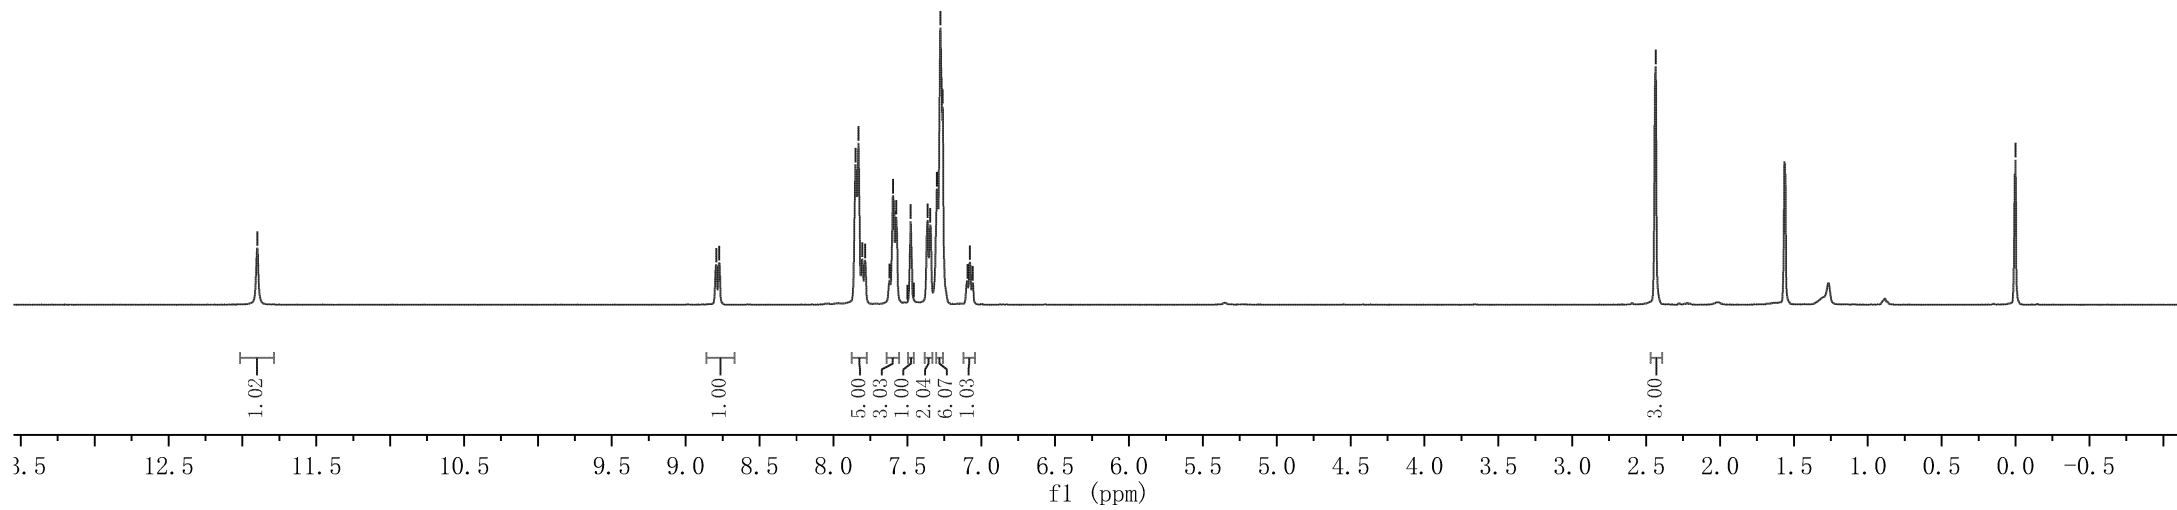

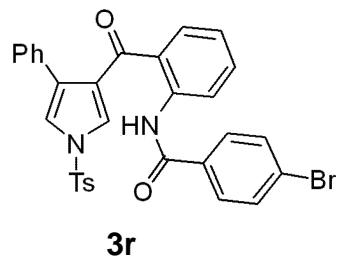

<sup>13</sup>C NMR (100 MHz, CDCl<sub>3</sub>) spectra of **3r**

194.40  
164.92  
146.19  
140.56  
134.89  
134.83  
133.61  
133.34  
132.15  
131.96  
130.41  
130.01  
129.02  
128.48  
128.12  
127.53  
127.39  
126.80  
126.46  
126.22  
124.08  
122.65  
121.15  
119.15

77.32  
77.00  
76.68

21.70

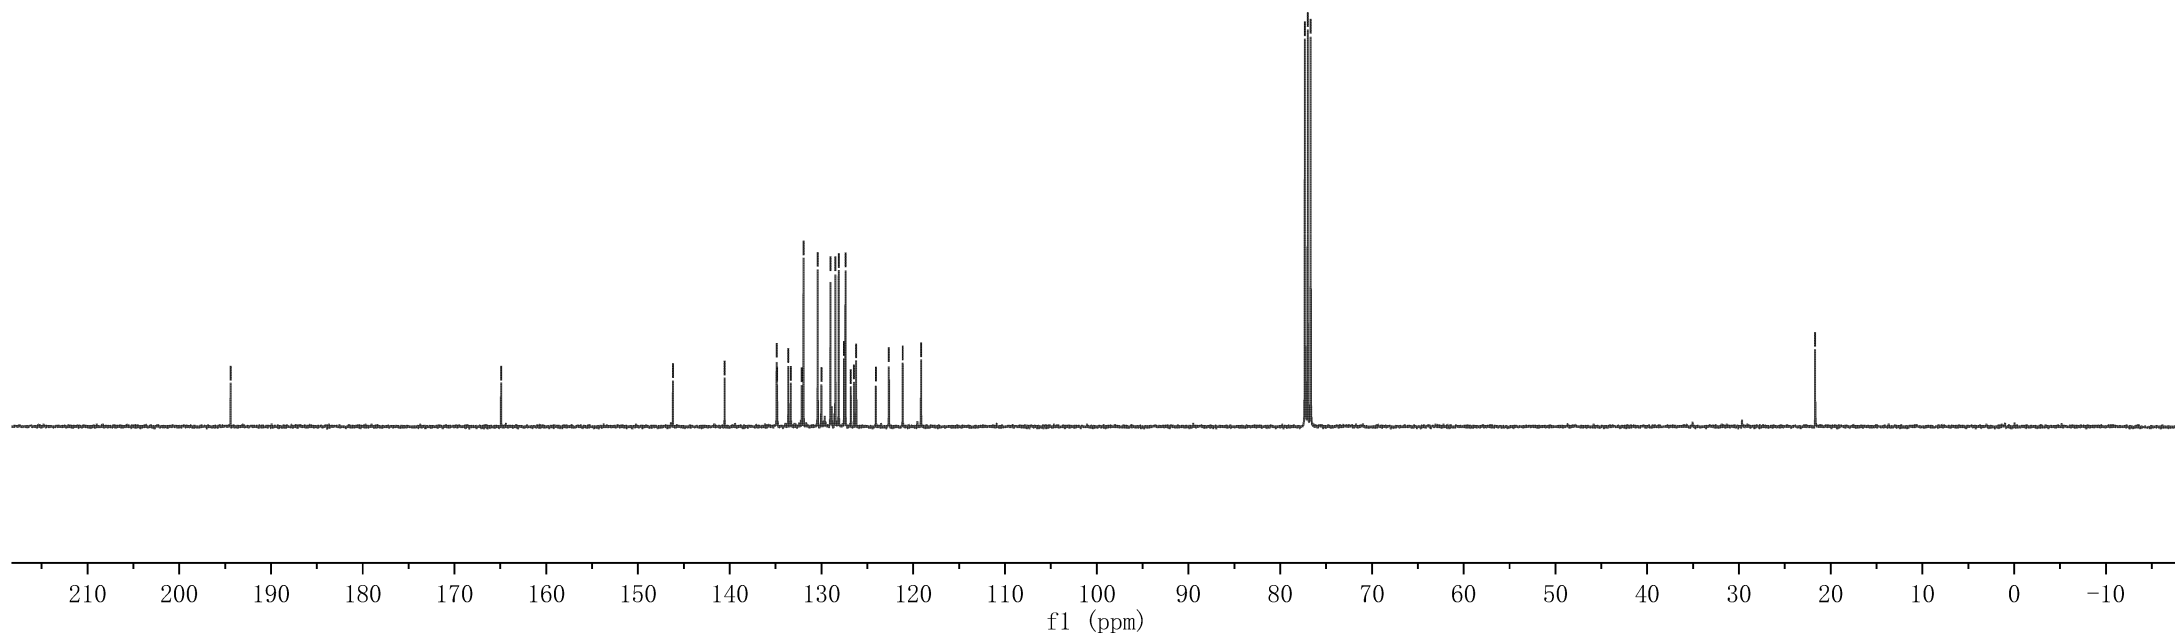

11.818

8.818  
8.796  
7.883  
7.863  
7.843  
7.823  
7.776  
7.756  
7.602  
7.582  
7.563  
7.474  
7.469  
7.358  
7.337  
7.299  
7.293  
7.275  
7.260  
7.253  
7.233  
7.059  
7.040  
7.021

2.430  
2.384

0.000

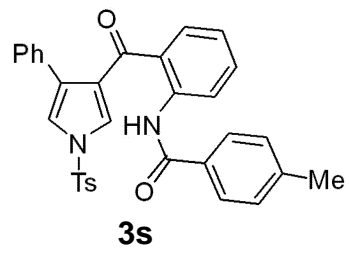

<sup>1</sup>H NMR (400 MHz, CDCl<sub>3</sub>) spectra of **3s**

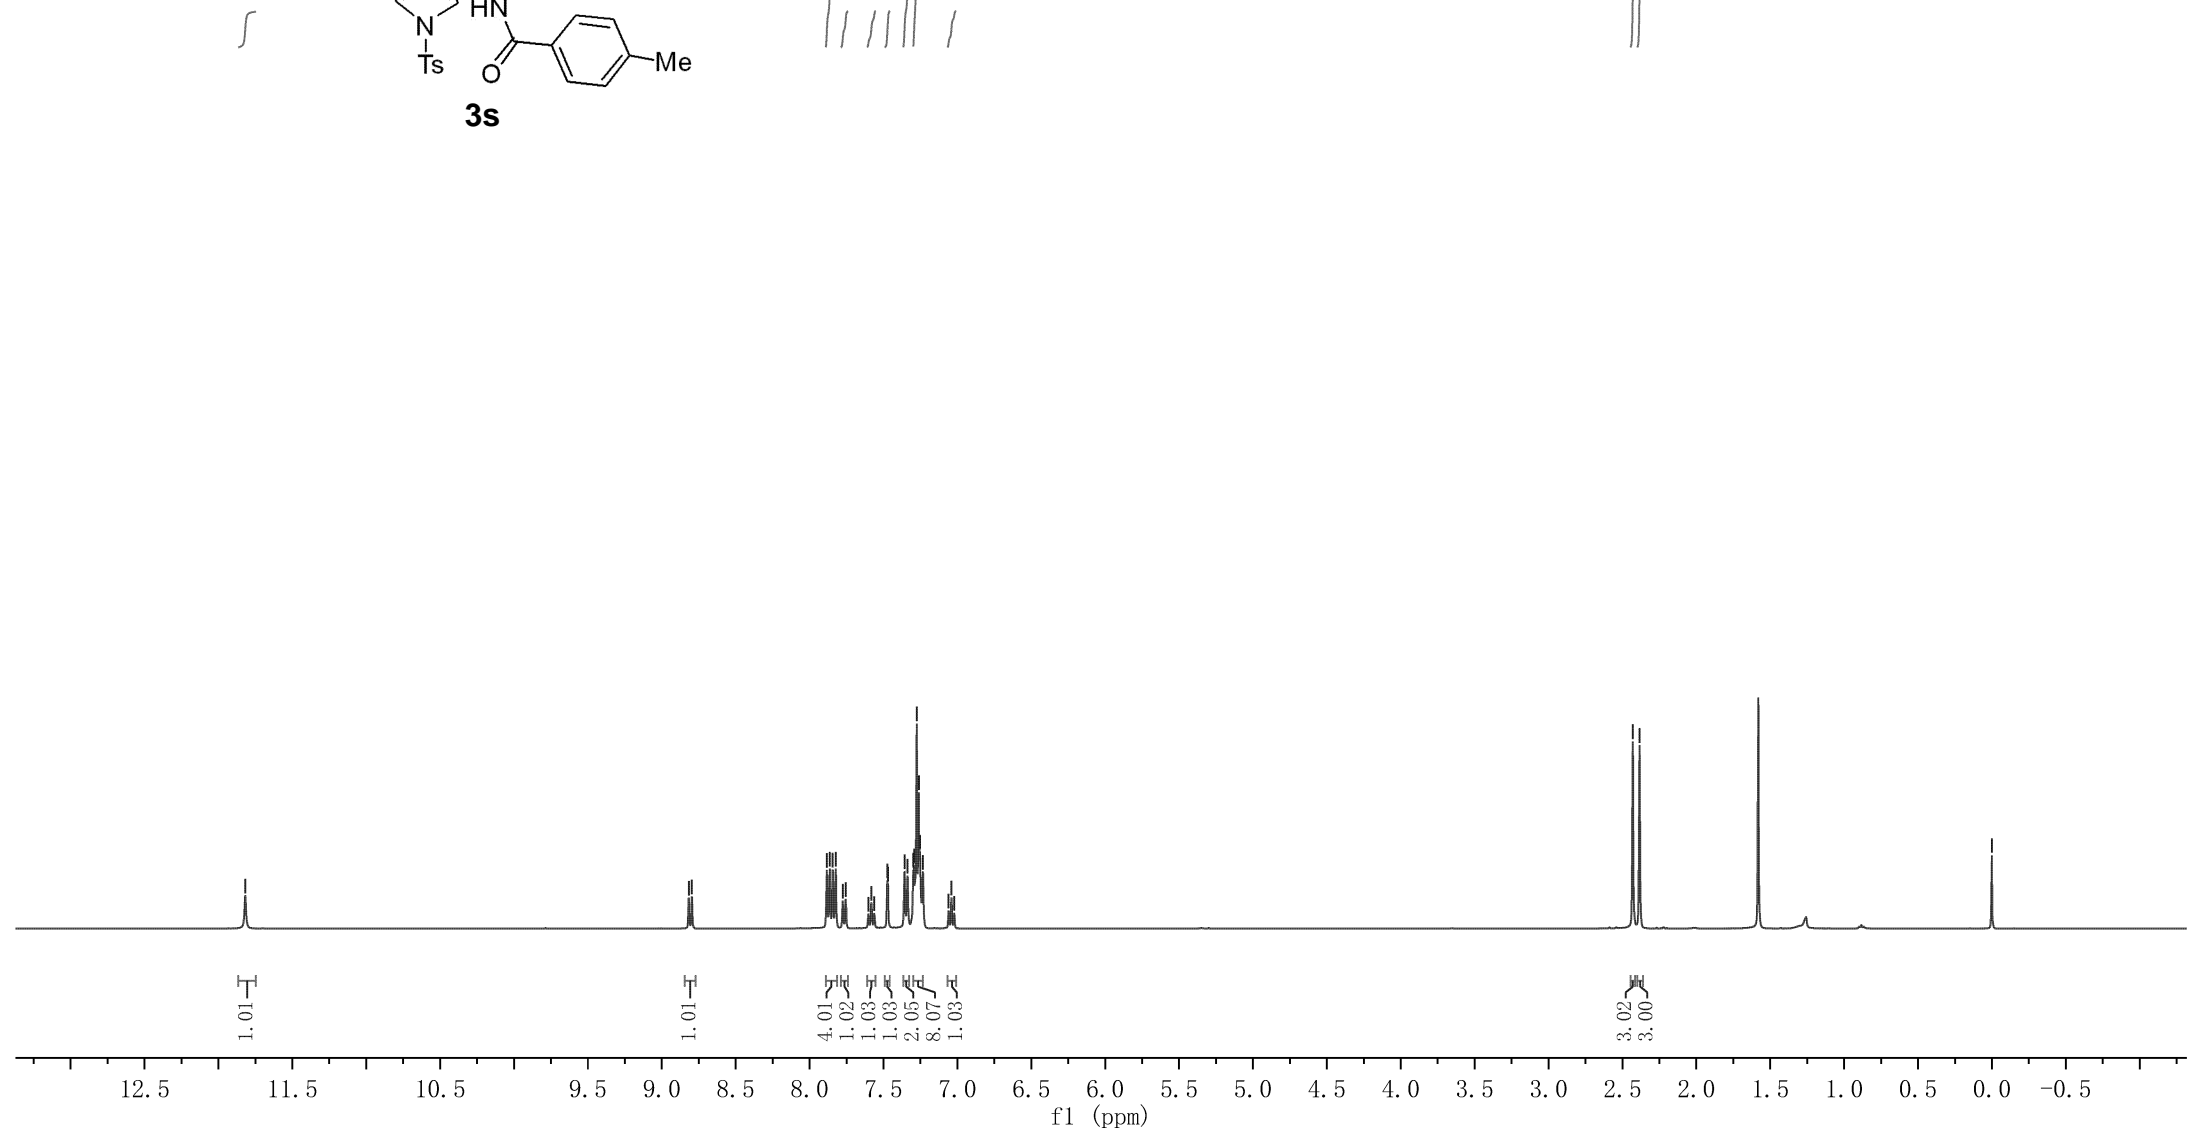

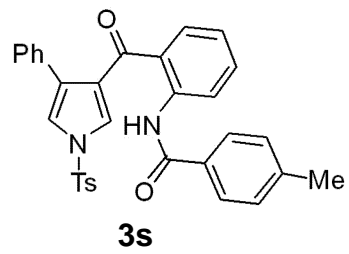

<sup>13</sup>C NMR (100 MHz, CDCl<sub>3</sub>) spectra of **3s**

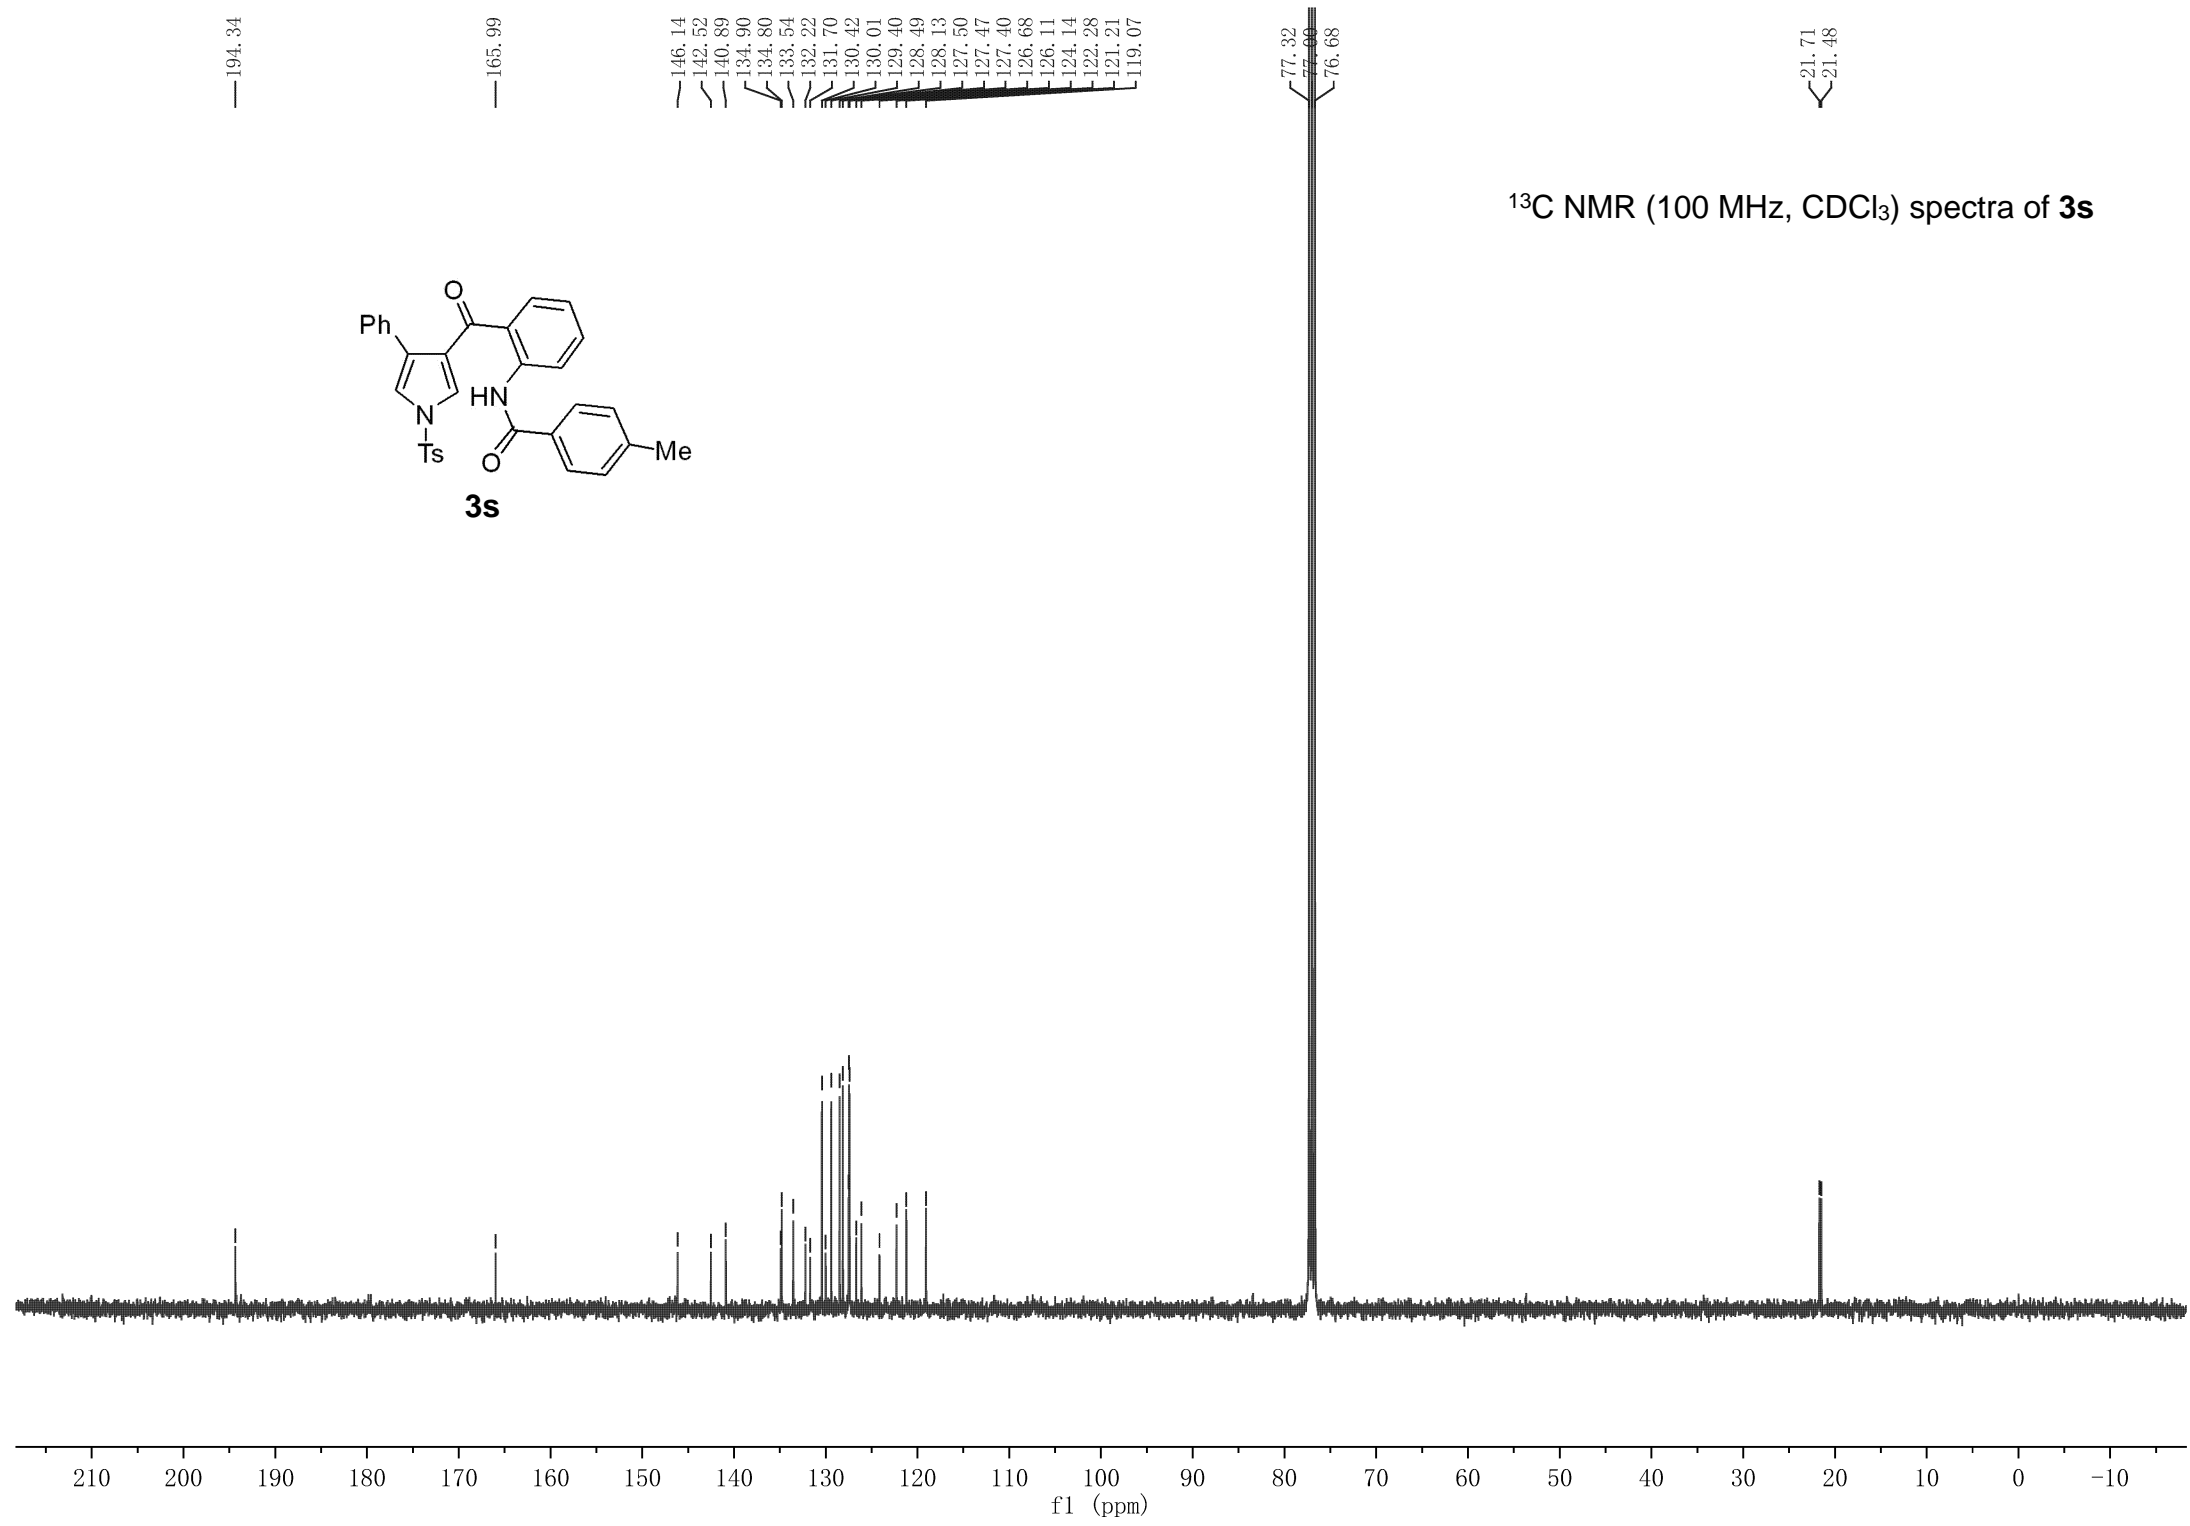

11.808

8.810  
8.788  
7.961  
7.939  
7.843  
7.823  
7.778  
7.759  
7.600  
7.581  
7.561  
7.485  
7.470  
7.464  
7.359  
7.339  
7.298  
7.294  
7.279  
7.261  
7.053  
7.034  
7.015  
6.946  
6.924

3.839

2.431

0.000

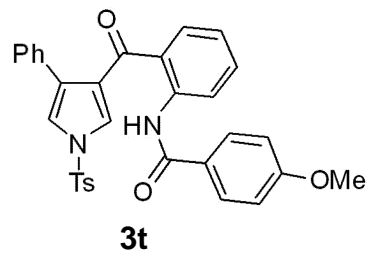

<sup>1</sup>H NMR (400 MHz, CDCl<sub>3</sub>) spectra of **3t**

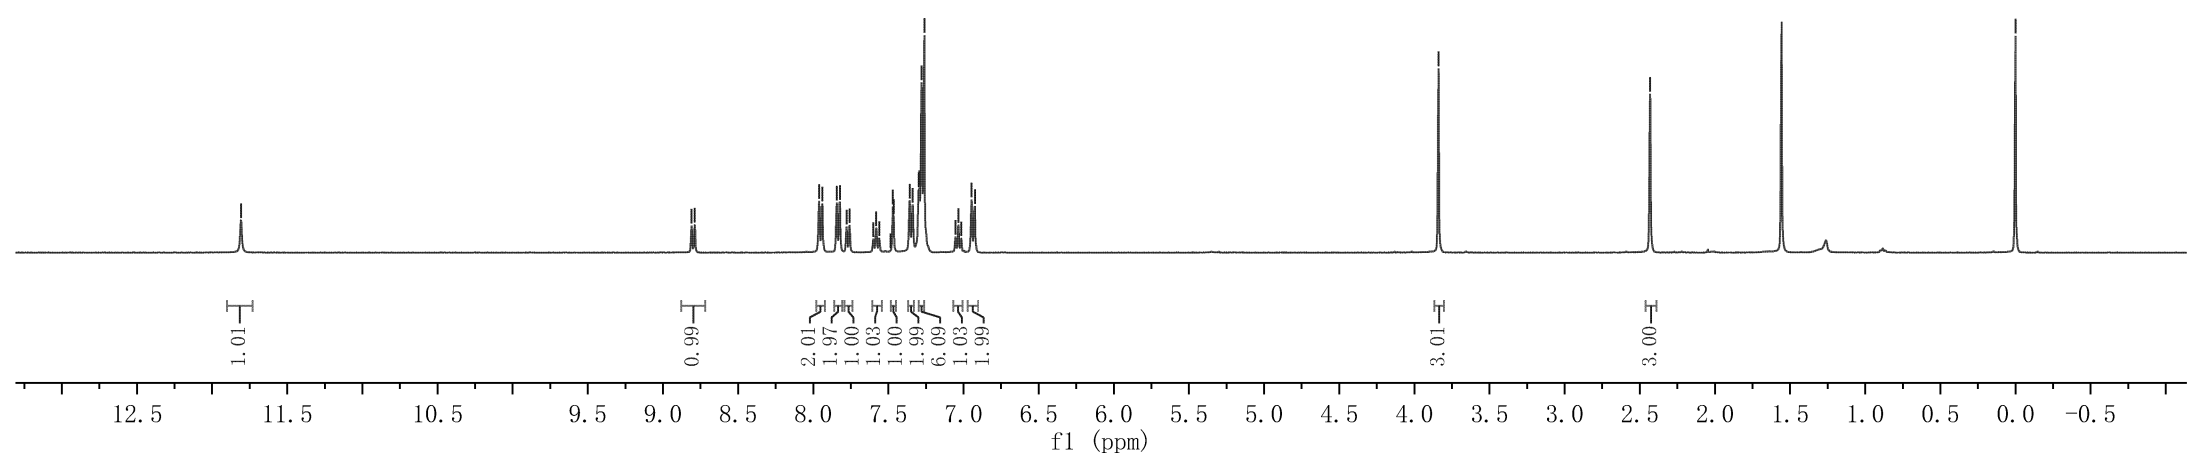

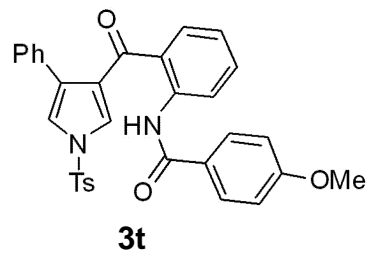

<sup>13</sup>C NMR (100 MHz, CDCl<sub>3</sub>) spectra of **3t**

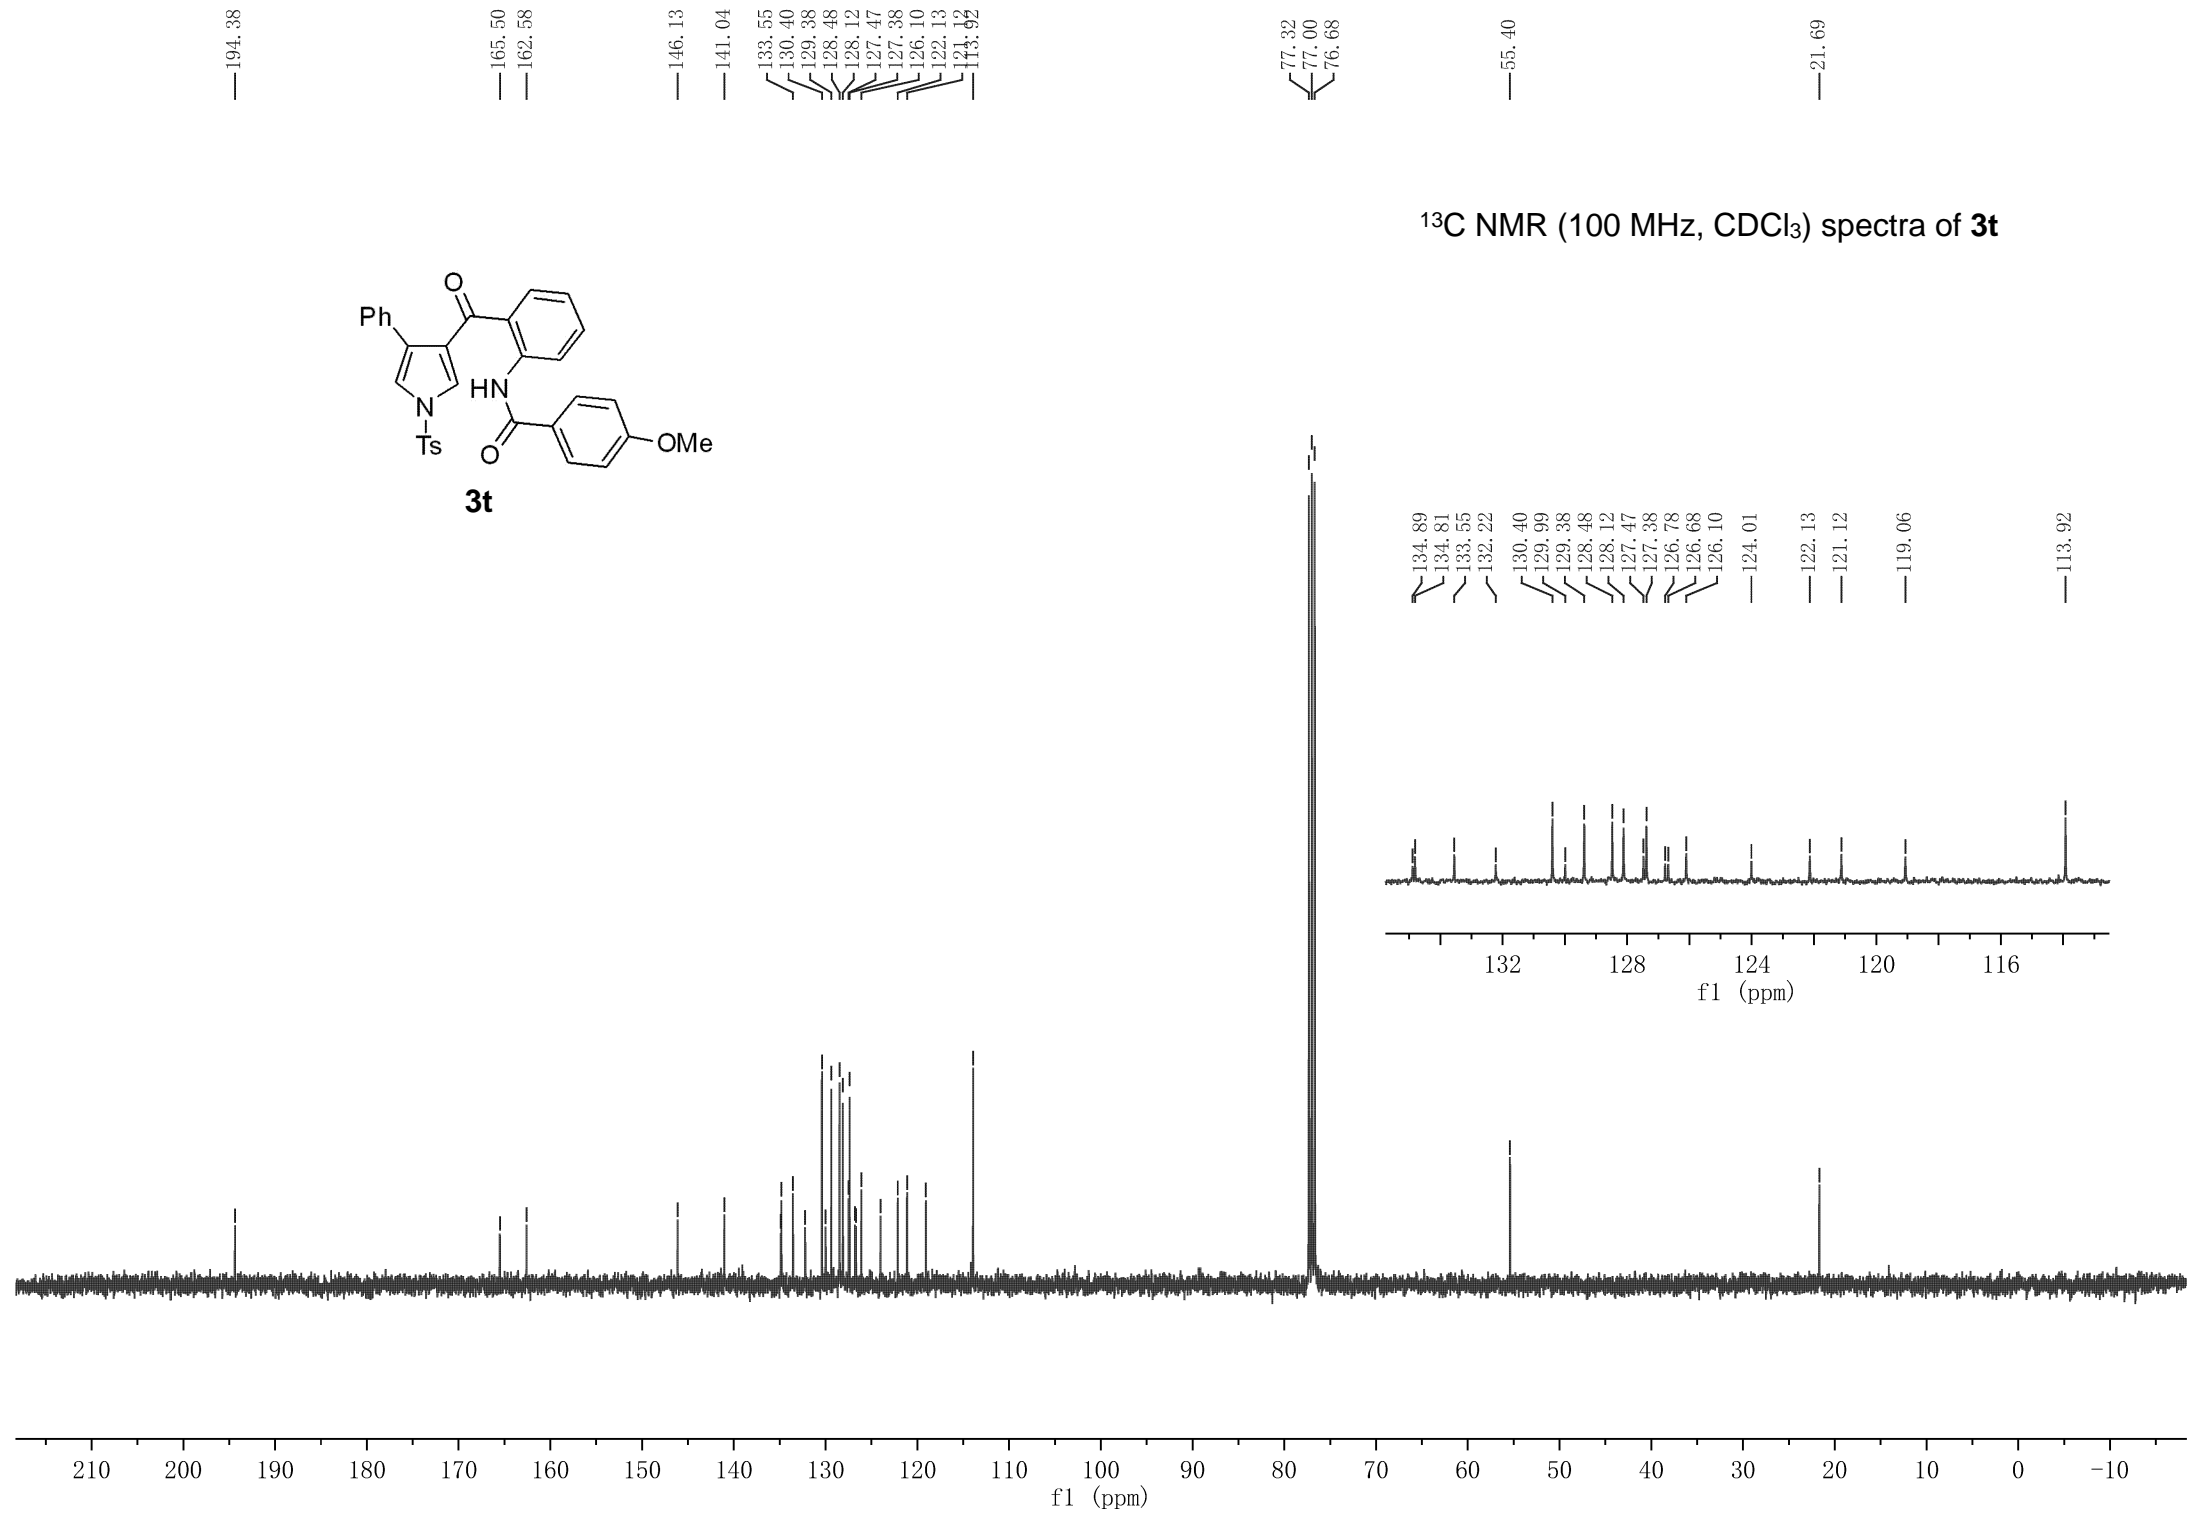

10.761

8.577  
8.556  
7.843  
7.823  
7.764  
7.745  
7.563  
7.545  
7.524  
7.433  
7.427  
7.373  
7.352  
7.308  
7.294  
7.285  
7.275  
7.261  
7.076  
7.057  
7.038

2.448

2.129

0.000

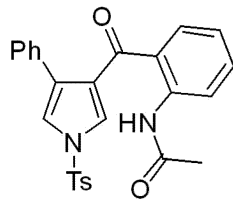

**3u**

<sup>1</sup>H NMR (400 MHz, CDCl<sub>3</sub>) spectra of **3u**

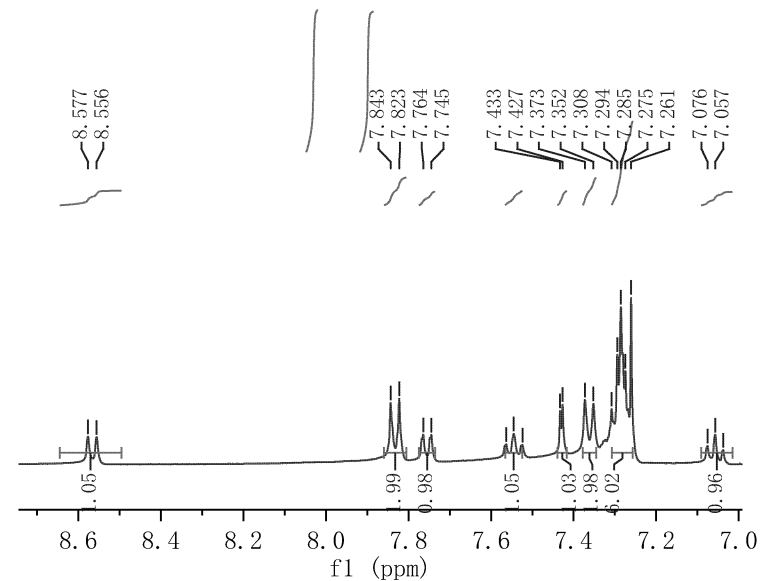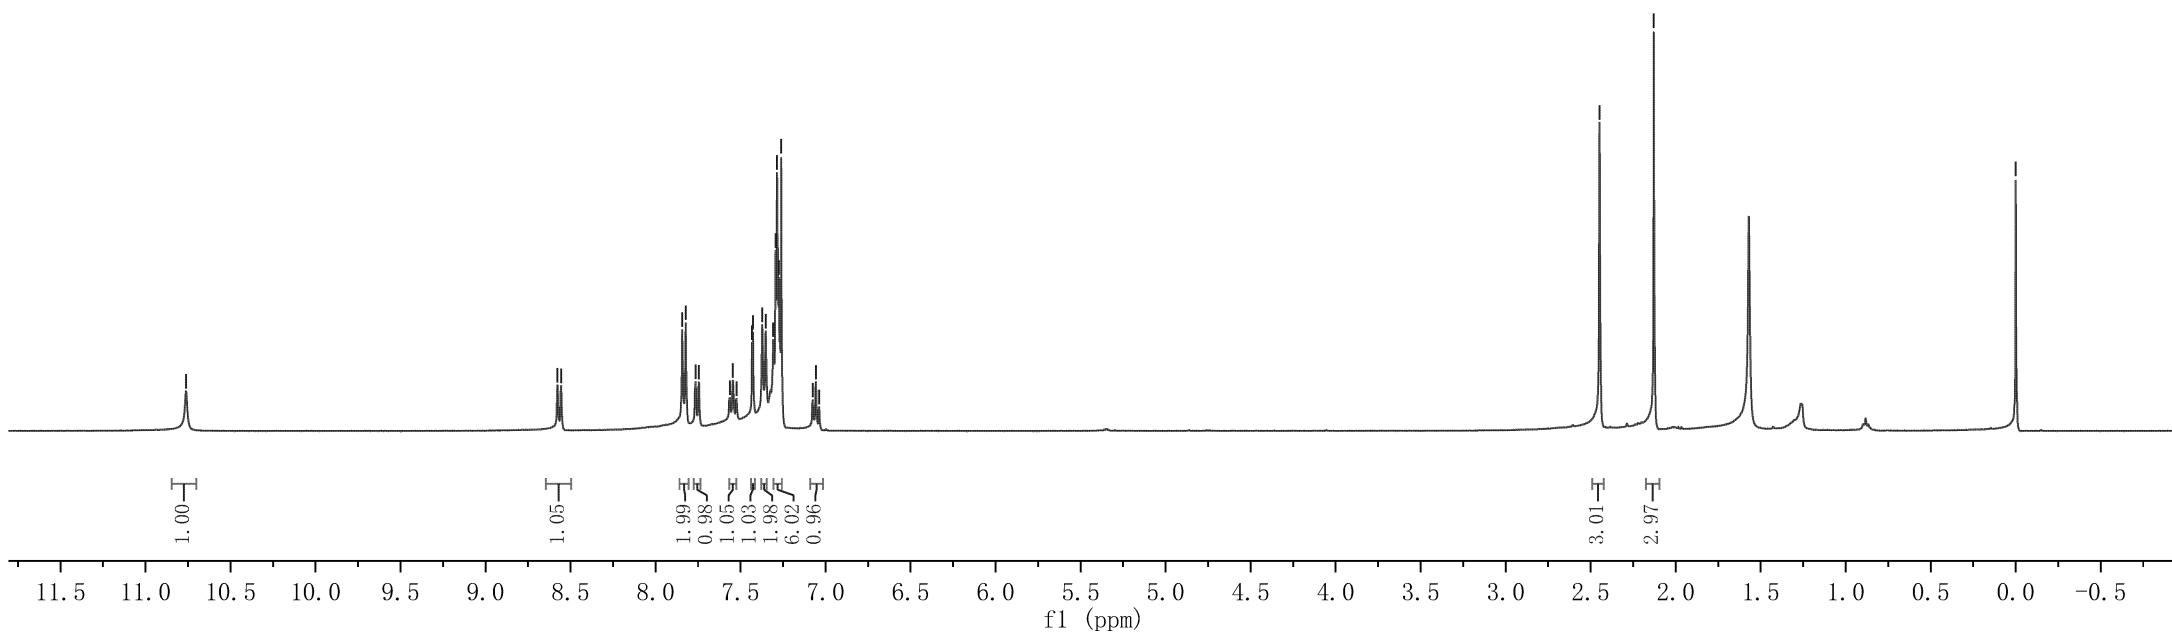

— 193.55

— 169.24

— 146.21

— 140.21

— 134.86

— 134.50

— 132.99

— 132.24

— 130.43

— 130.21

— 128.46

— 128.18

— 127.61

— 127.40

— 126.76

— 126.40

— 124.17

— 122.33

— 121.33

— 119.30

— 77.32

— 77.00

— 76.68

— 25.25

— 21.72

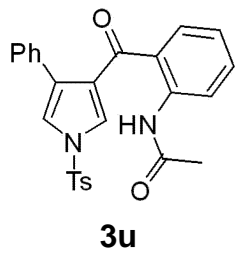

<sup>13</sup>C NMR (100 MHz, CDCl<sub>3</sub>) spectra of **3u**

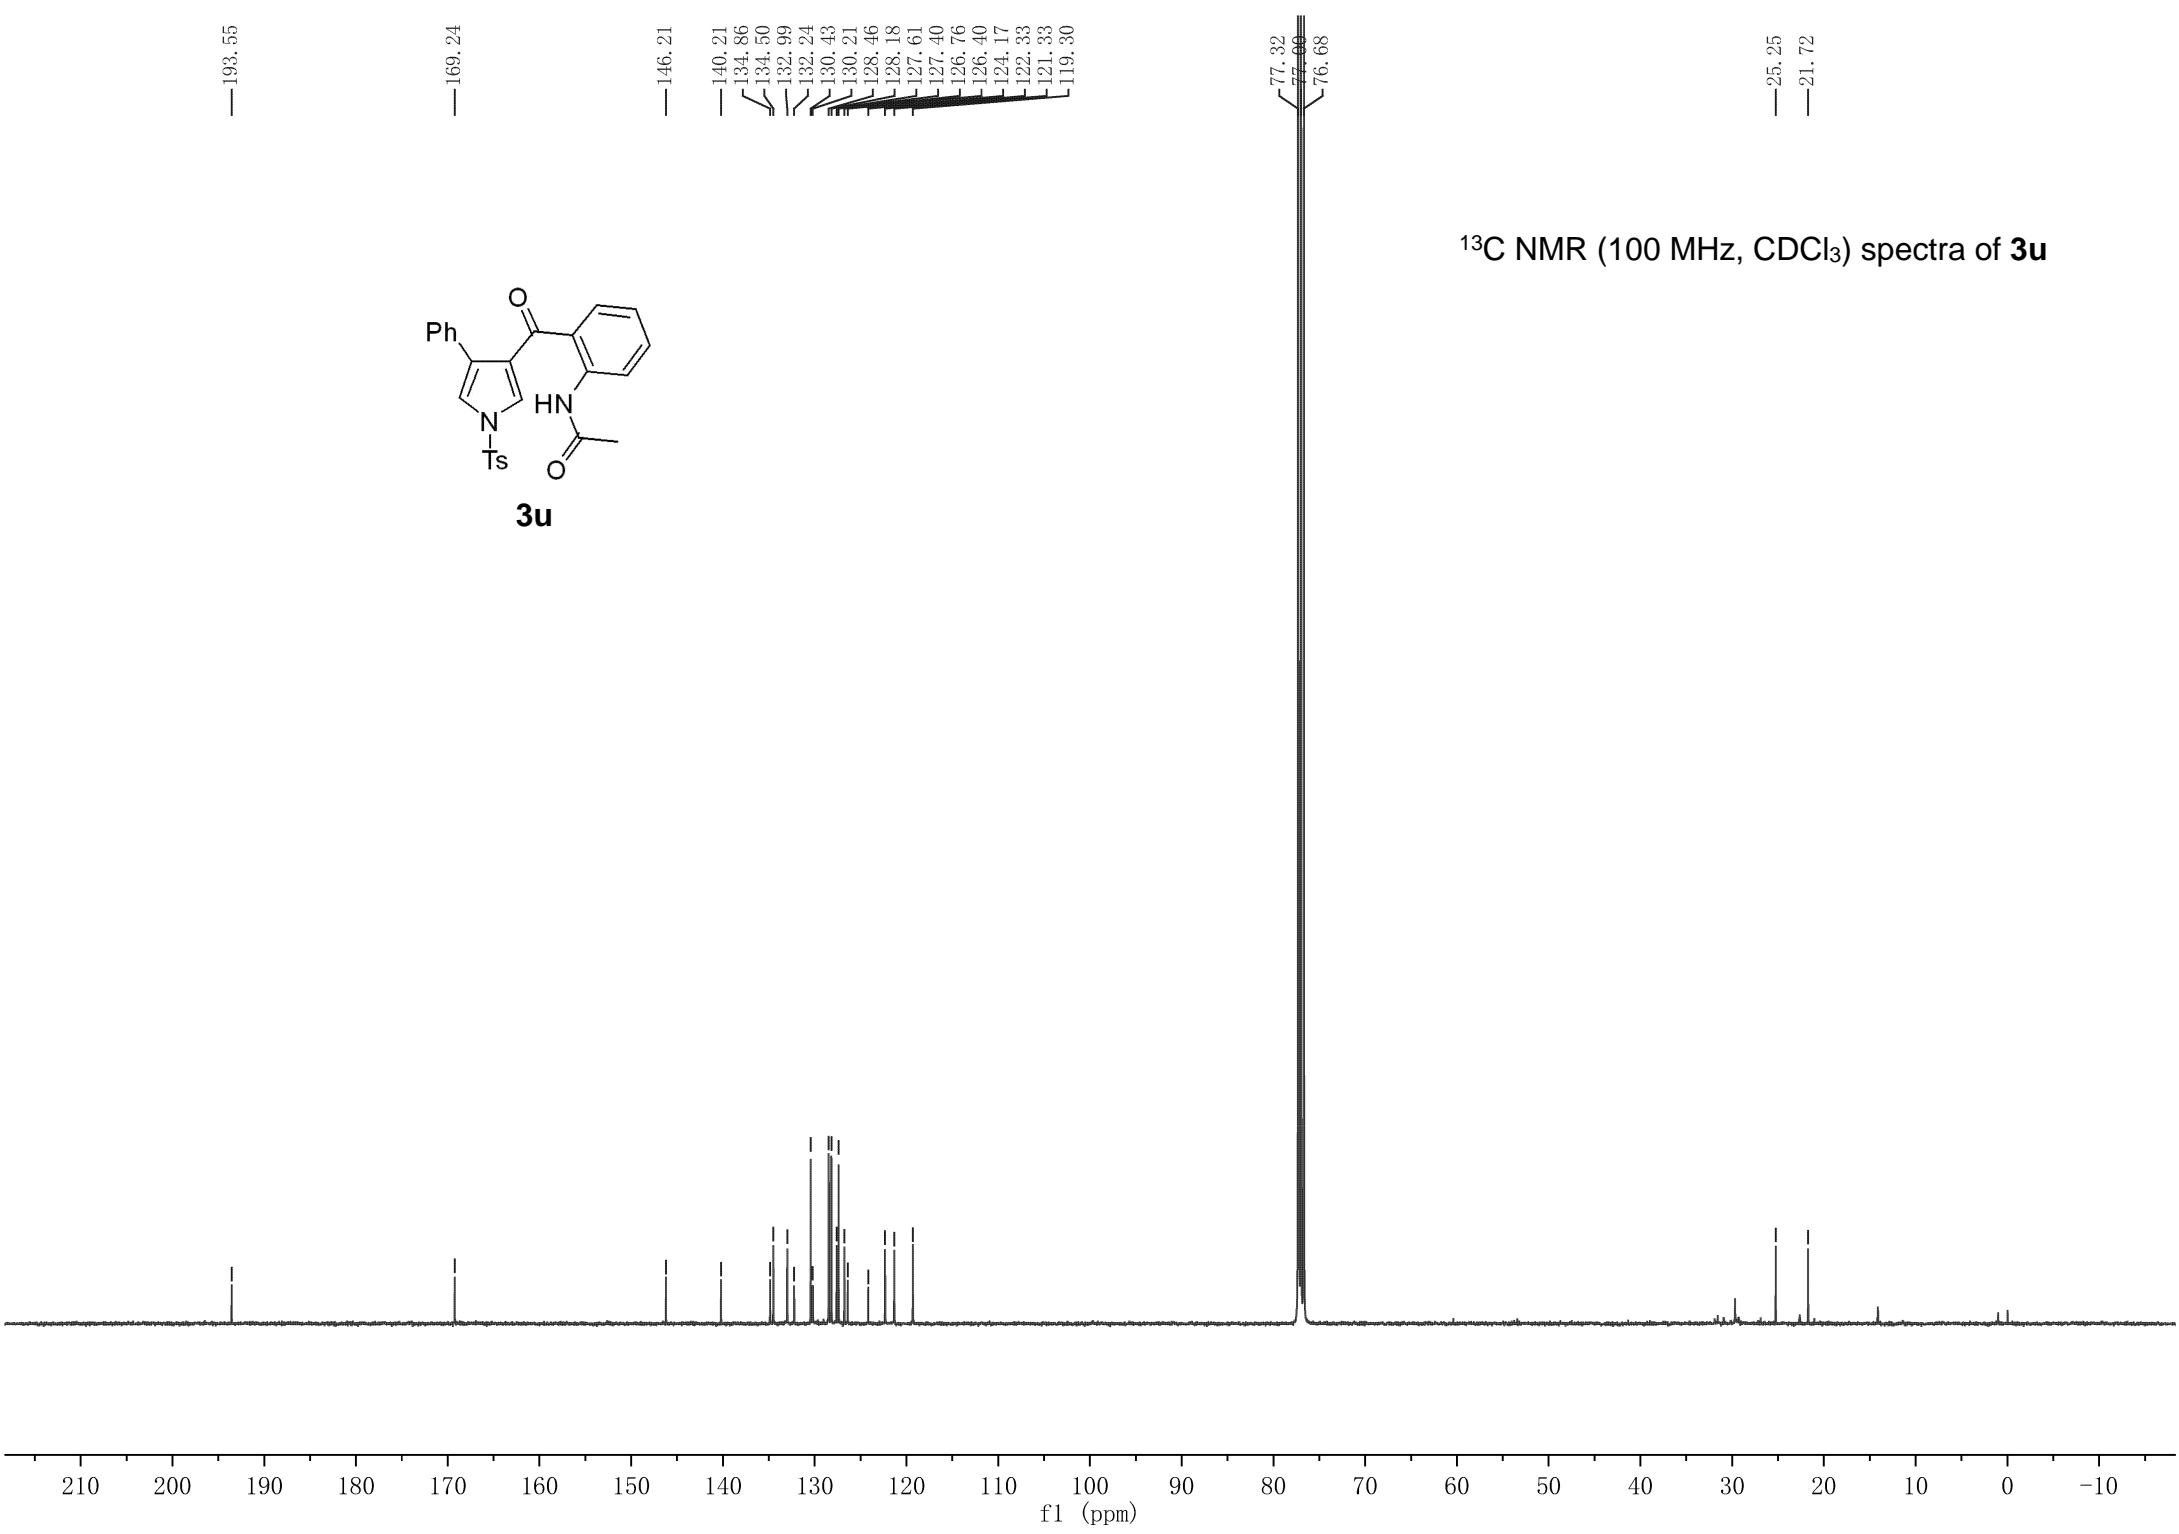



8.535  
 7.825  
 7.804  
 7.678  
 7.658  
 7.360  
 7.339  
 7.319  
 7.272  
 7.257  
 7.249  
 6.675  
 6.524  
 6.505  
 6.486

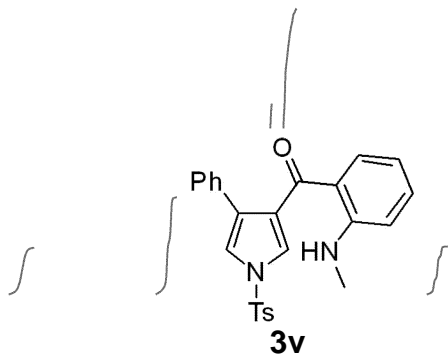

2.888  
 2.875  
 2.427  
 0.000

<sup>1</sup>H NMR (400 MHz, CDCl<sub>3</sub>) spectra of **3v**

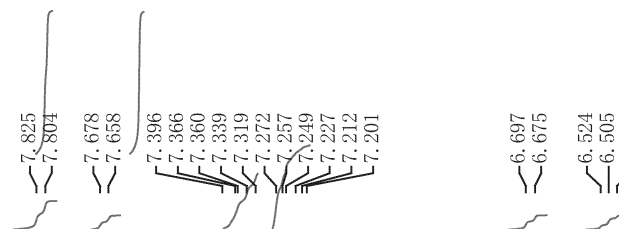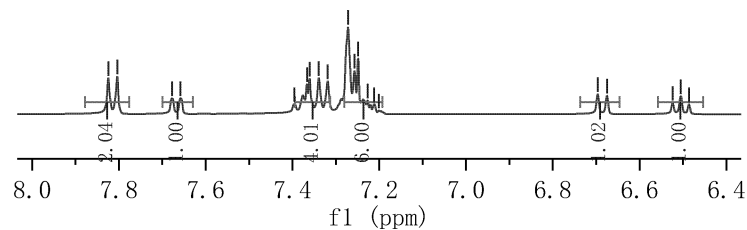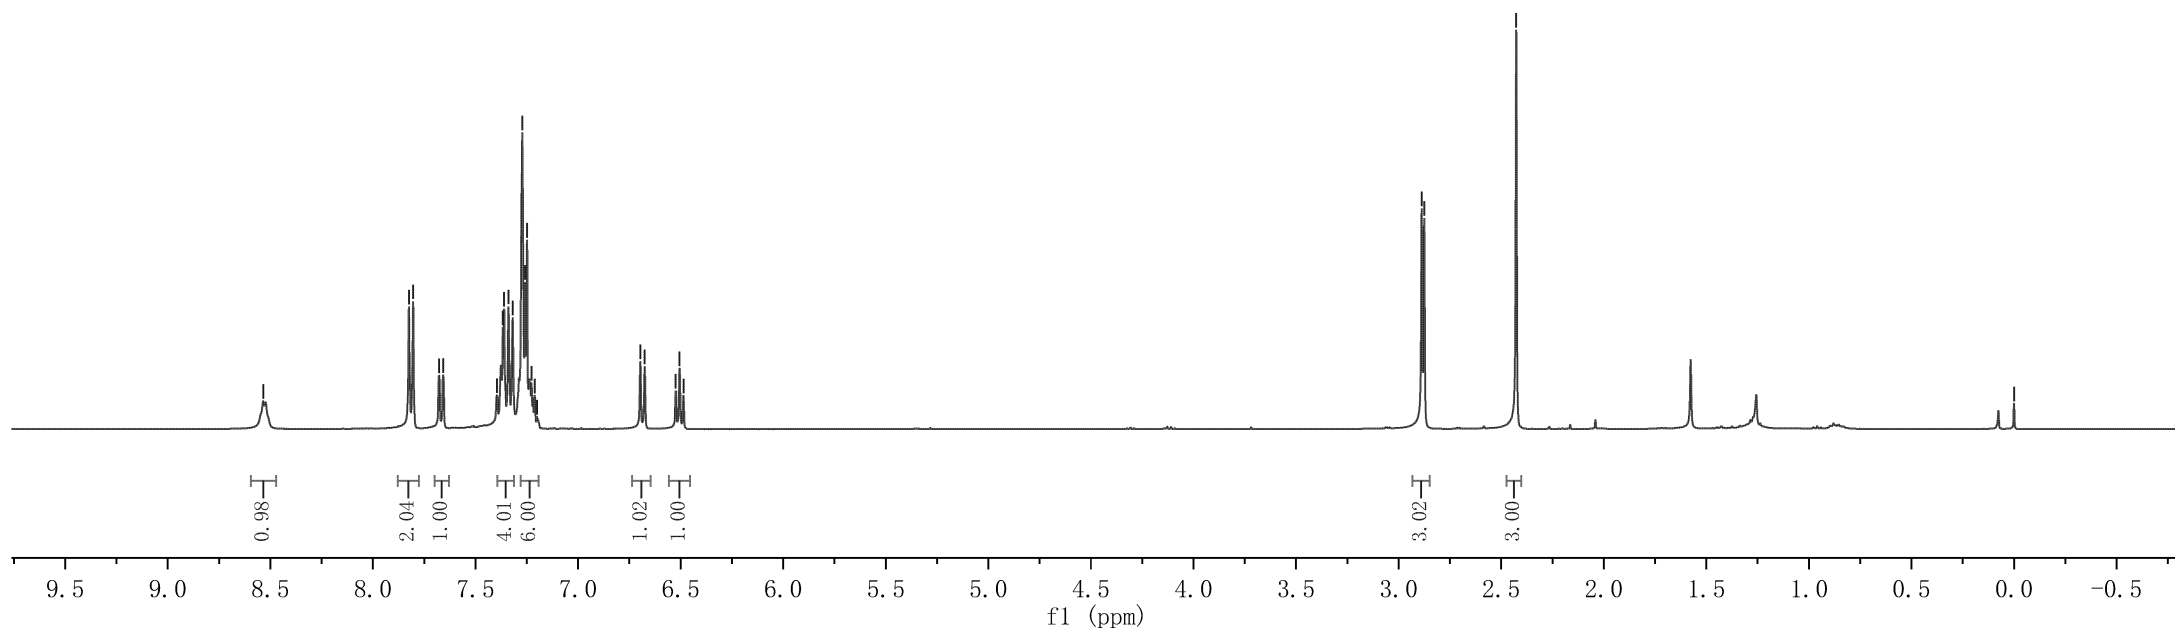

— 193.00

— 152.46

— 145.75

135.30

134.75

132.70

130.25

129.97

128.55

127.93

127.22

123.90

118.42

118.30

113.81

110.85

77.32

77.00

76.68

— 29.30

— 21.65

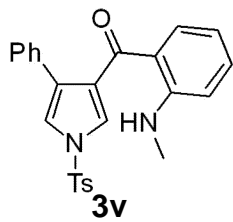

<sup>13</sup>C NMR (100 MHz, CDCl<sub>3</sub>) spectra of **3v**

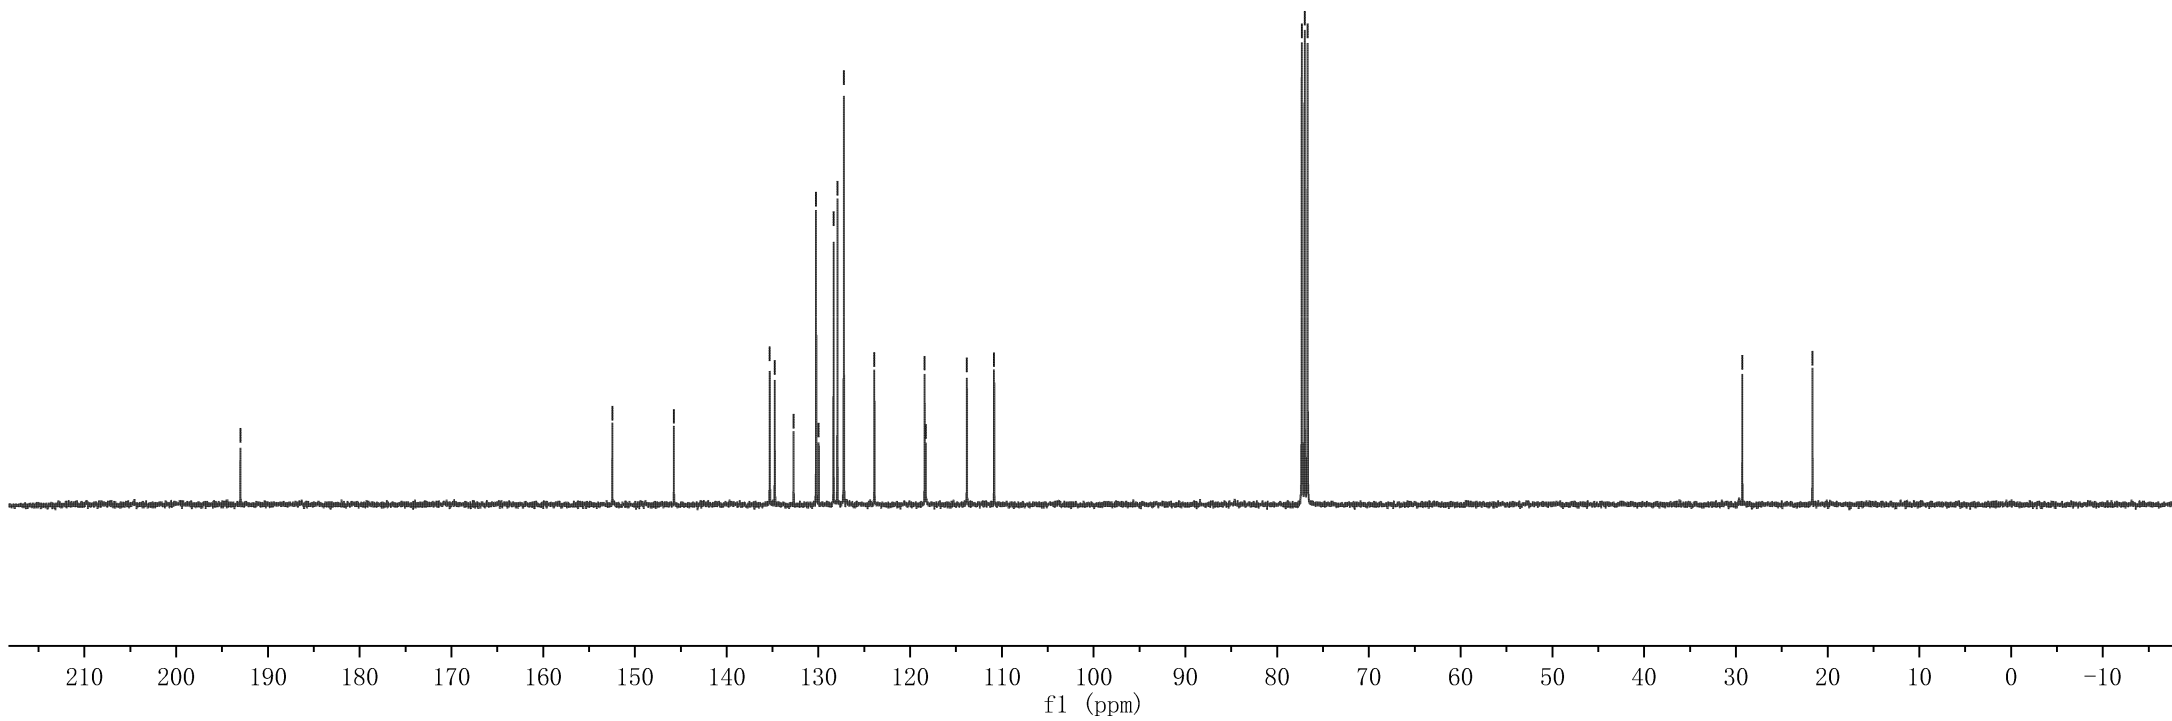

8.056  
8.038  
8.017  
7.911  
7.890  
7.792  
7.720  
7.702  
7.454  
7.436  
7.417  
7.392  
7.372  
7.337  
7.318  
7.299  
7.238  
7.219  
7.201  
7.188  
7.135  
7.116  
7.098  
7.070  
7.051  
7.033

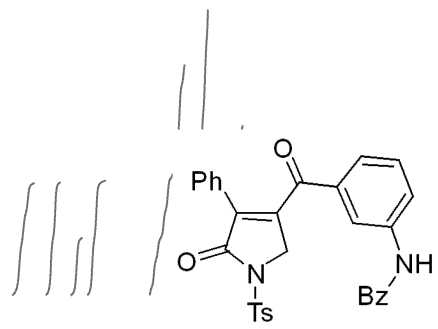

**3wa**

4.759

2.327

0.000

<sup>1</sup>H NMR (400 MHz, CDCl<sub>3</sub>) spectra of 3wa

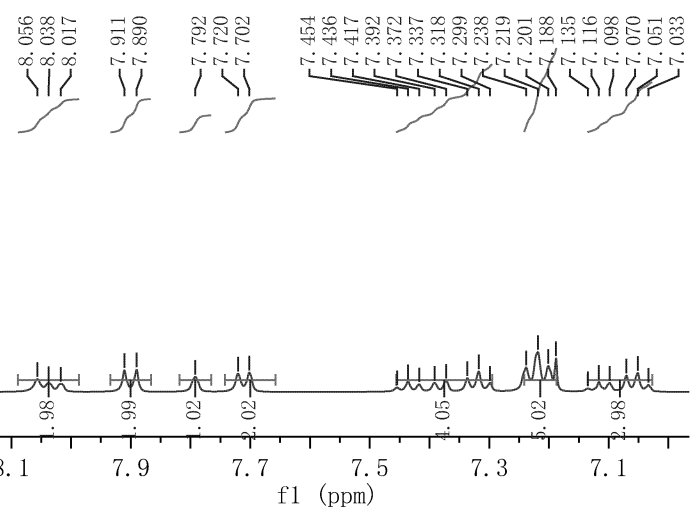

1.98  
1.99  
1.02  
2.02  
4.05  
5.02  
2.98

1.98

3.00

9.0  
8.5  
8.0  
7.5  
7.0  
6.5  
6.0  
5.5  
5.0  
4.5  
4.0  
3.5  
3.0  
2.5  
2.0  
1.5  
1.0  
0.5  
0.0  
-0.5

f1 (ppm)

—192.06

166.77  
165.70

147.91  
145.65  
138.78  
136.50  
134.96  
134.71  
134.20  
132.13  
129.89  
129.83  
129.64  
129.18  
128.75  
128.61  
128.34  
128.28  
127.04  
125.83  
125.08  
120.63

77.32  
77.00  
76.68

—50.78

—21.68

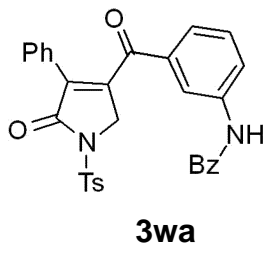

<sup>13</sup>C NMR (100 MHz, CDCl<sub>3</sub>) spectra of **3wa**

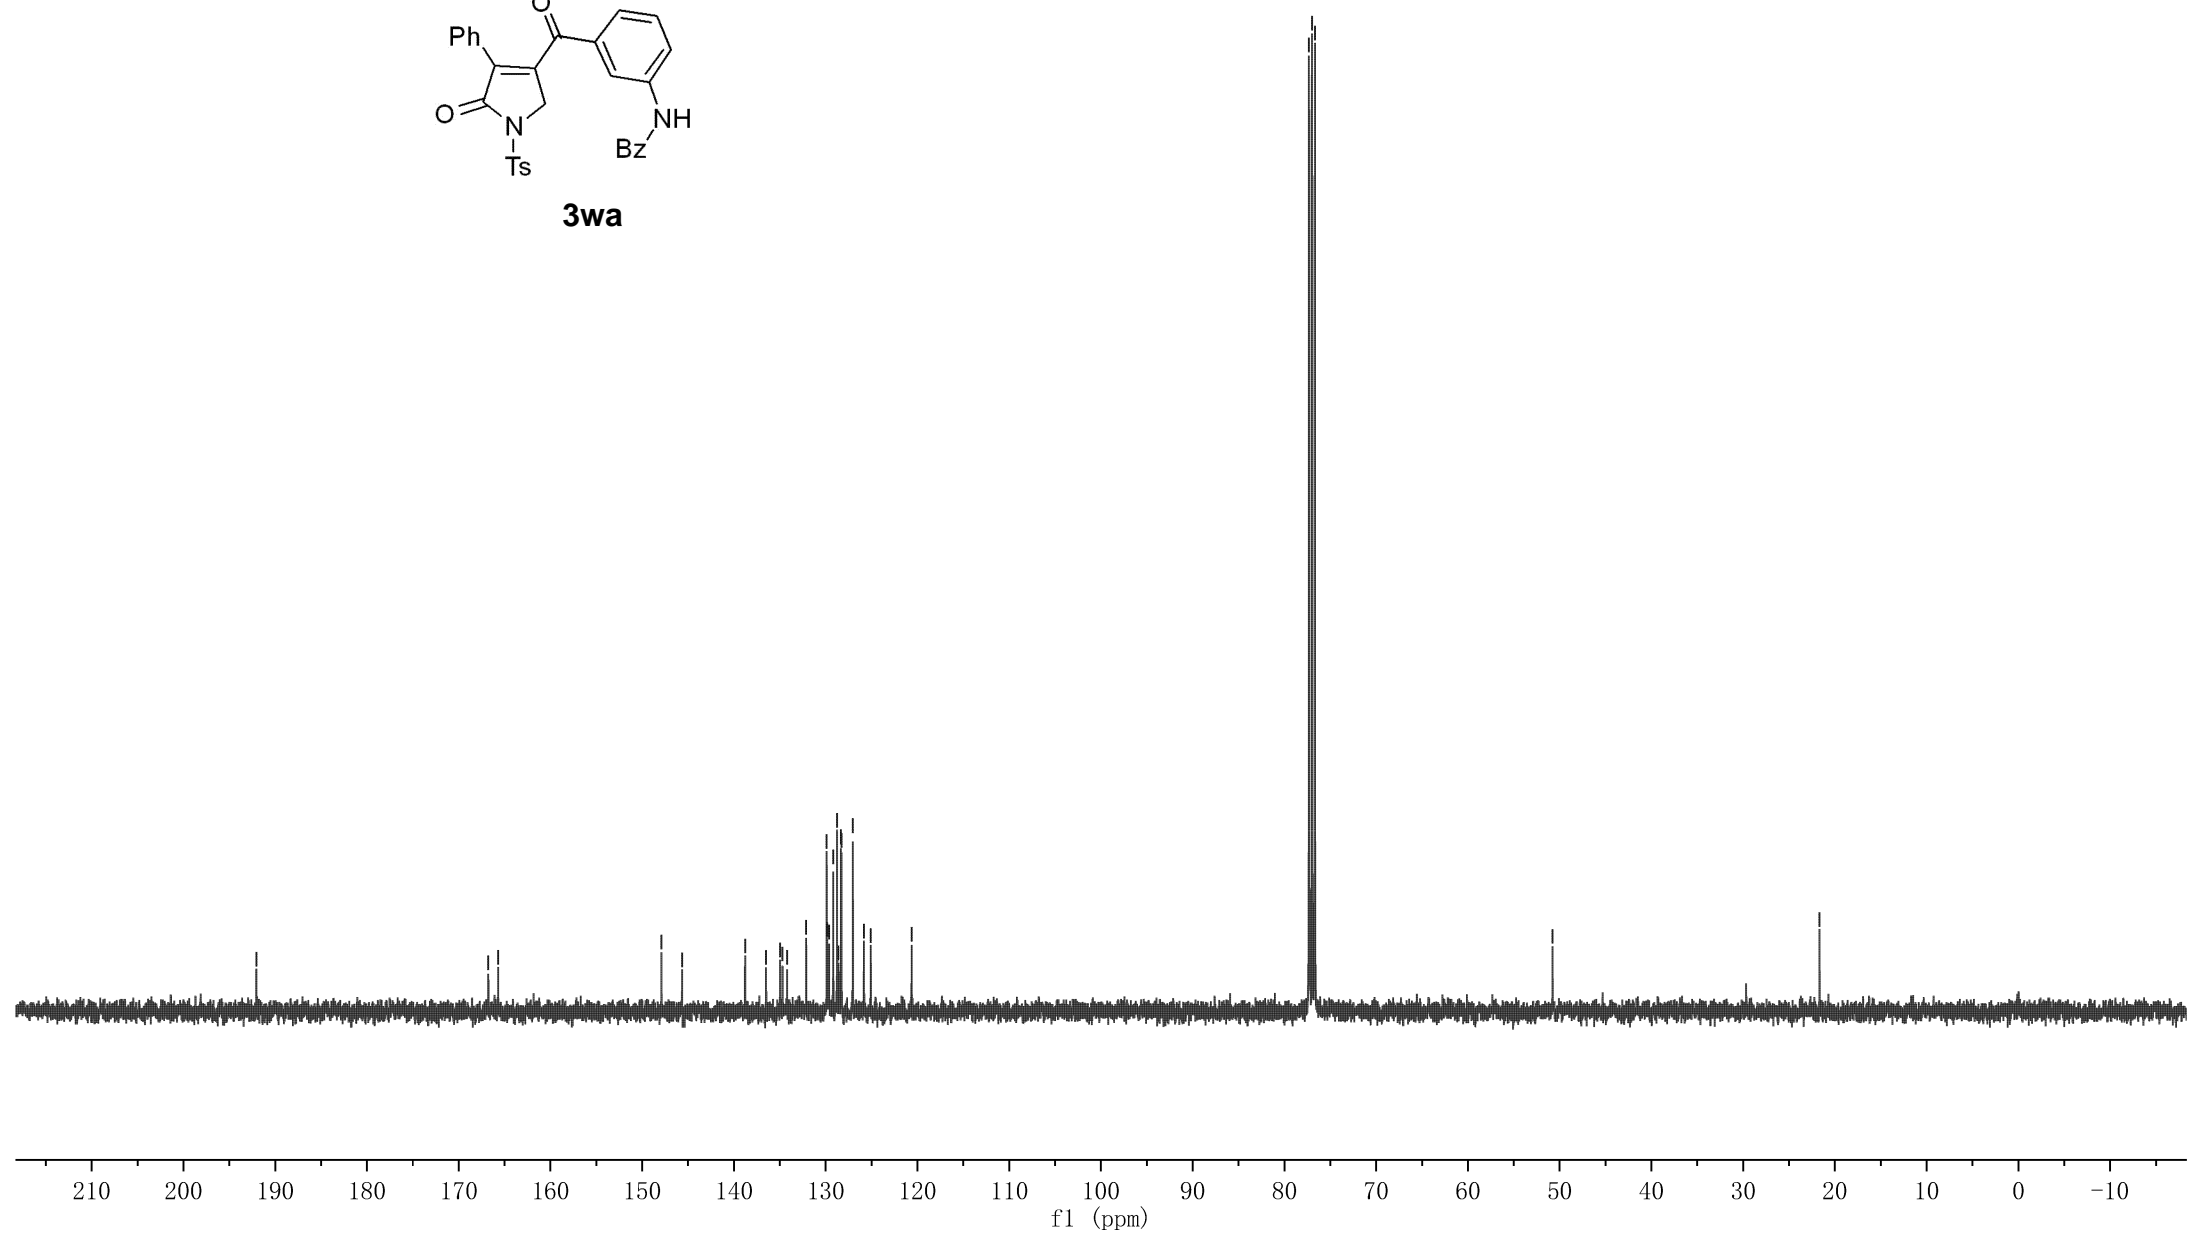

8.117  
8.097  
7.954  
7.934  
7.698  
7.680  
7.663  
7.553  
7.535  
7.518  
7.458  
7.439  
7.419  
7.319  
7.299  
7.258  
7.250  
7.230  
7.190  
7.175  
7.159  
7.139  
7.116  
7.096  
7.080  
7.060

4.692

2.416

0.000

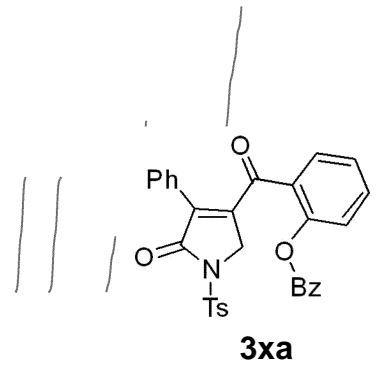

<sup>1</sup>H NMR (400 MHz, CDCl<sub>3</sub>) spectra of **3xa**

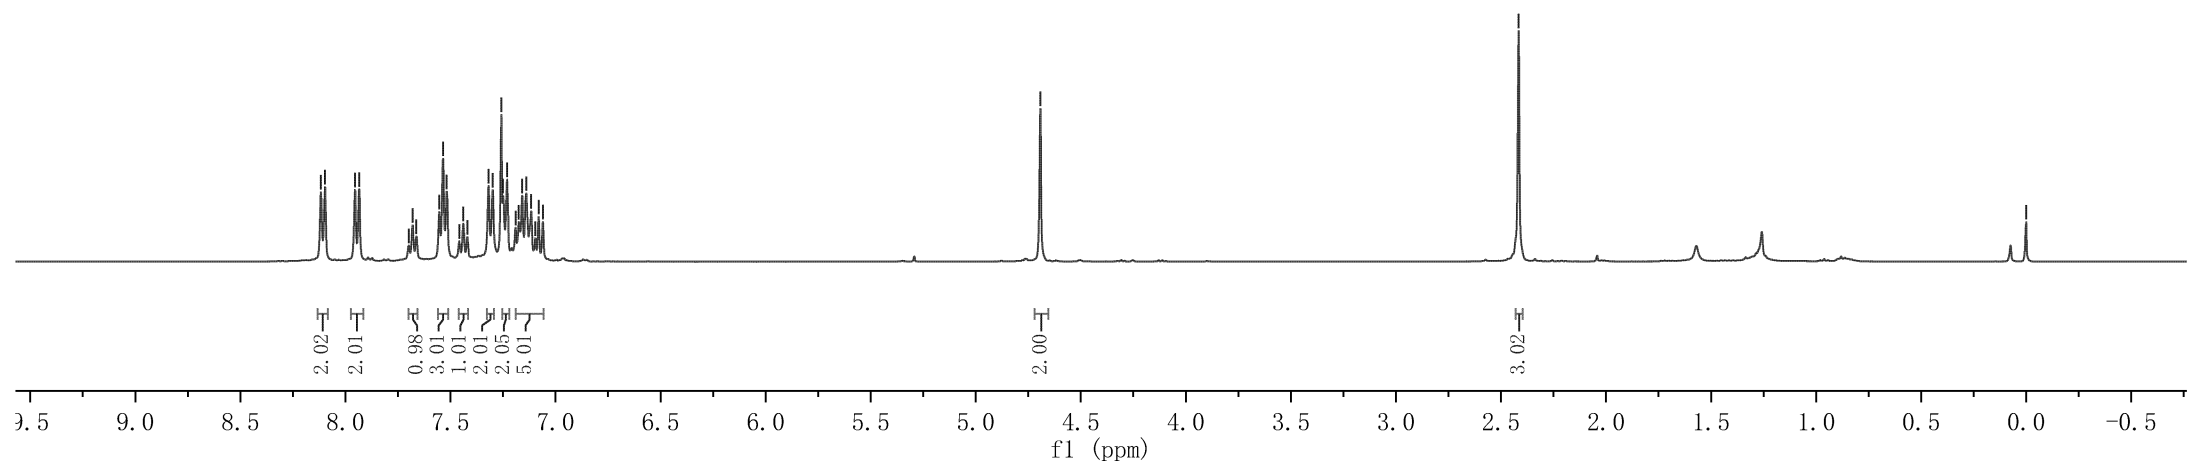

190.07

166.62  
164.79

149.36  
147.09  
145.46  
137.86  
134.83  
134.37  
134.28  
130.96  
129.97  
129.83  
129.74  
129.57  
128.97  
128.94  
128.46  
128.23  
128.08  
127.97  
125.93  
123.43

77.32  
77.00  
76.68

50.20

21.66

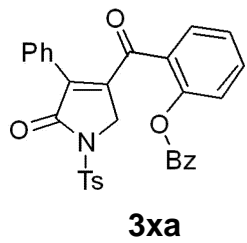

<sup>13</sup>C NMR (100 MHz, CDCl<sub>3</sub>) spectra of **3xa**

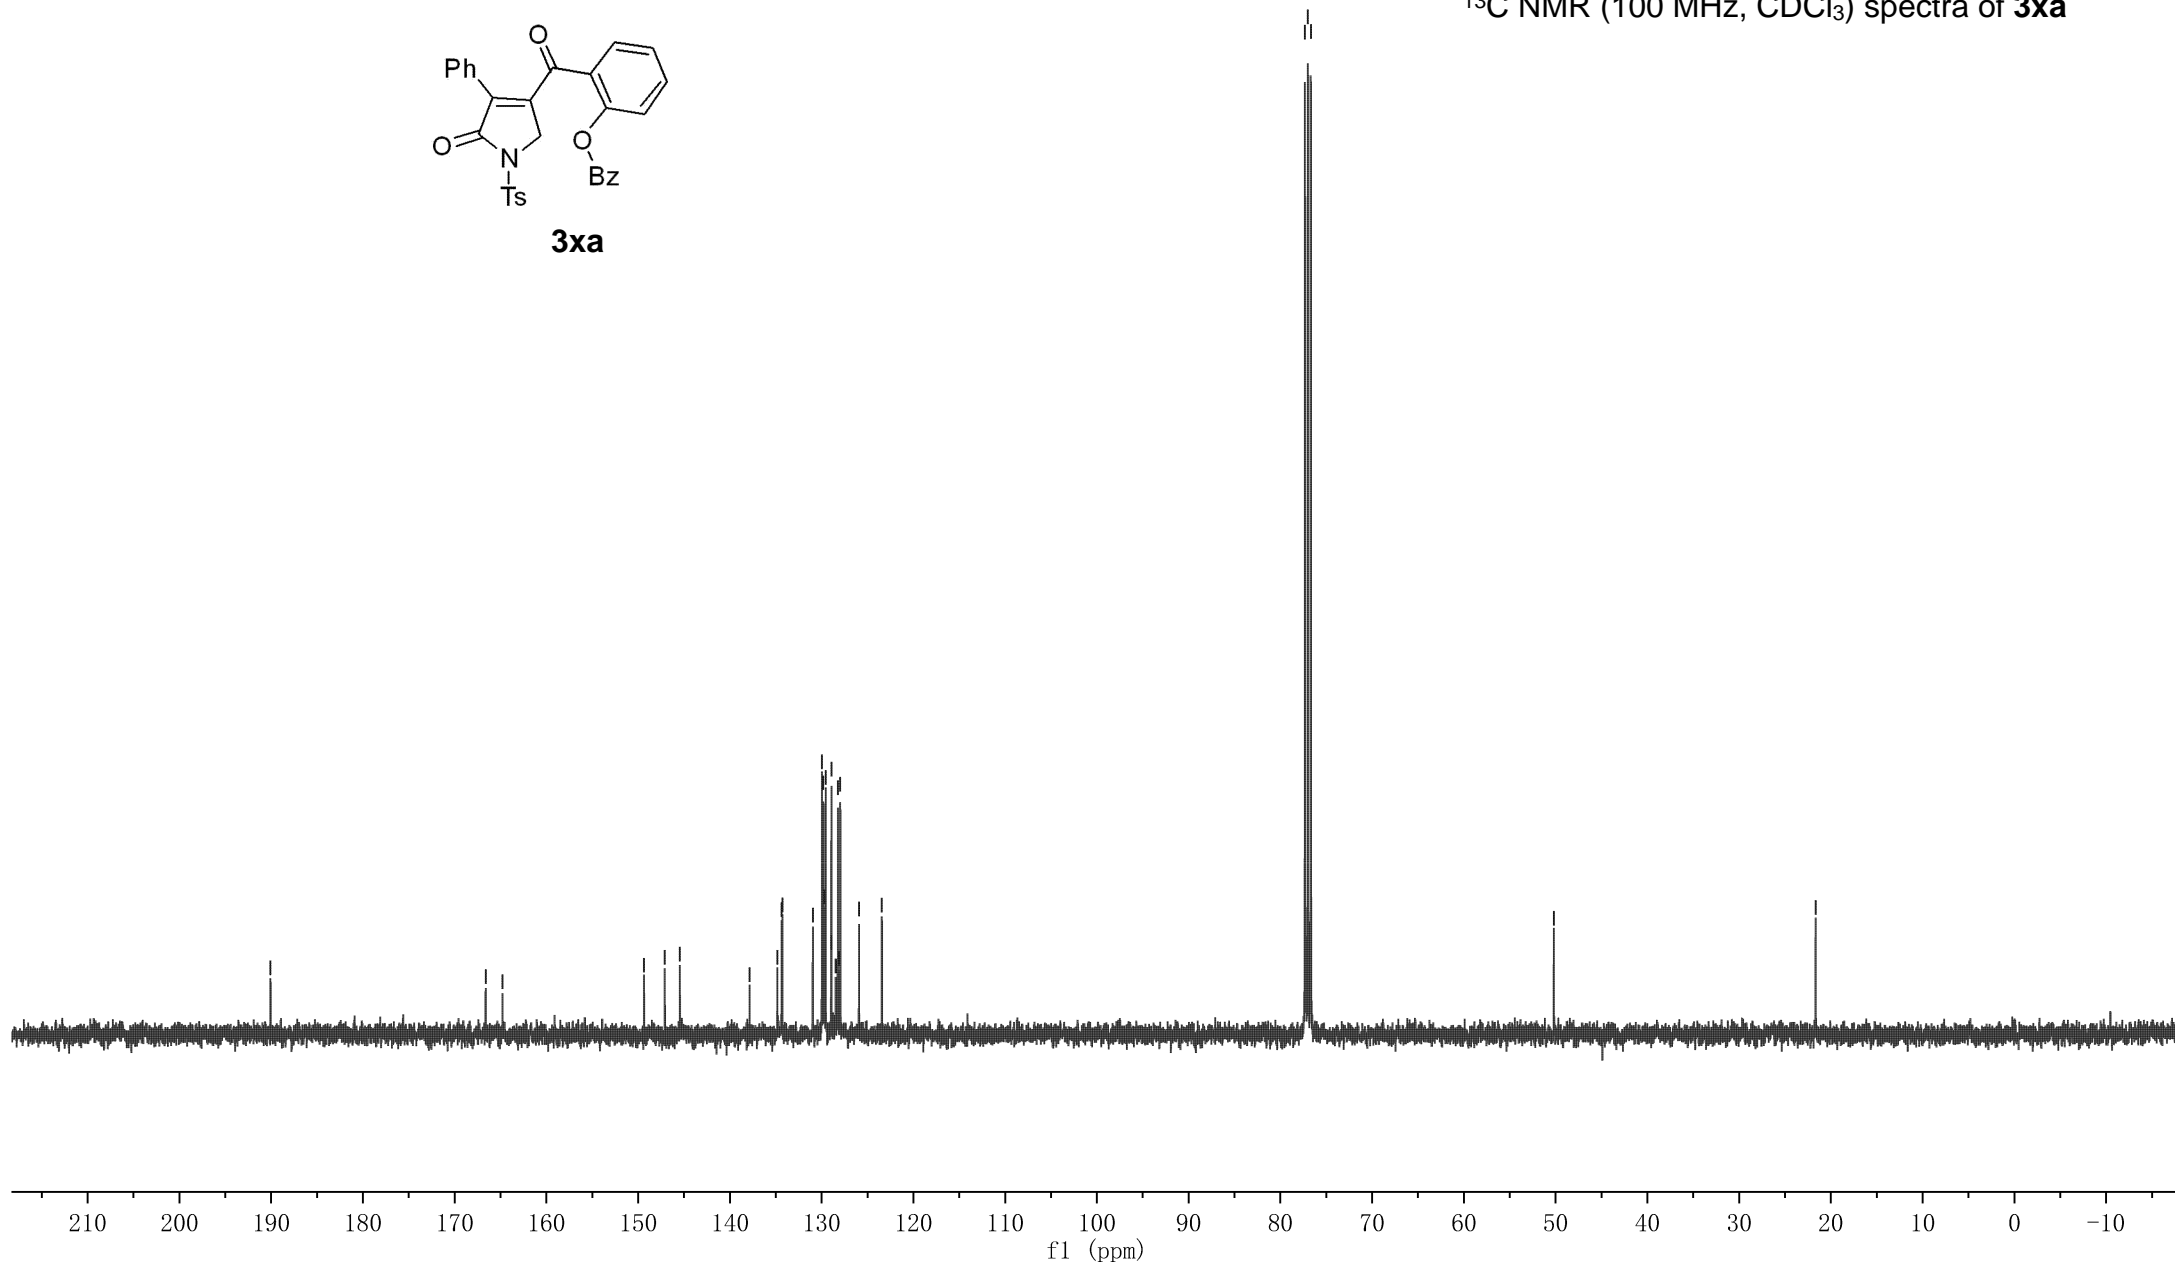

8.051  
8.032  
7.679  
7.661  
7.472  
7.456  
7.438  
7.377  
7.358  
7.294  
7.279  
7.264  
7.206  
7.189  
7.164  
7.147  
7.130

4.798

2.444

0.000

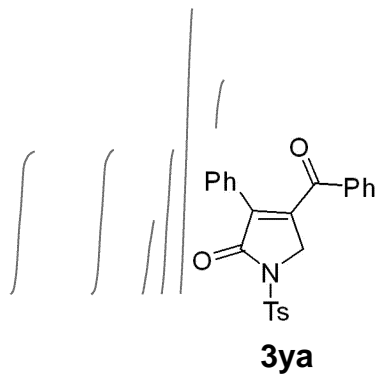

<sup>1</sup>H NMR (400 MHz, CDCl<sub>3</sub>) spectra of **3ya**

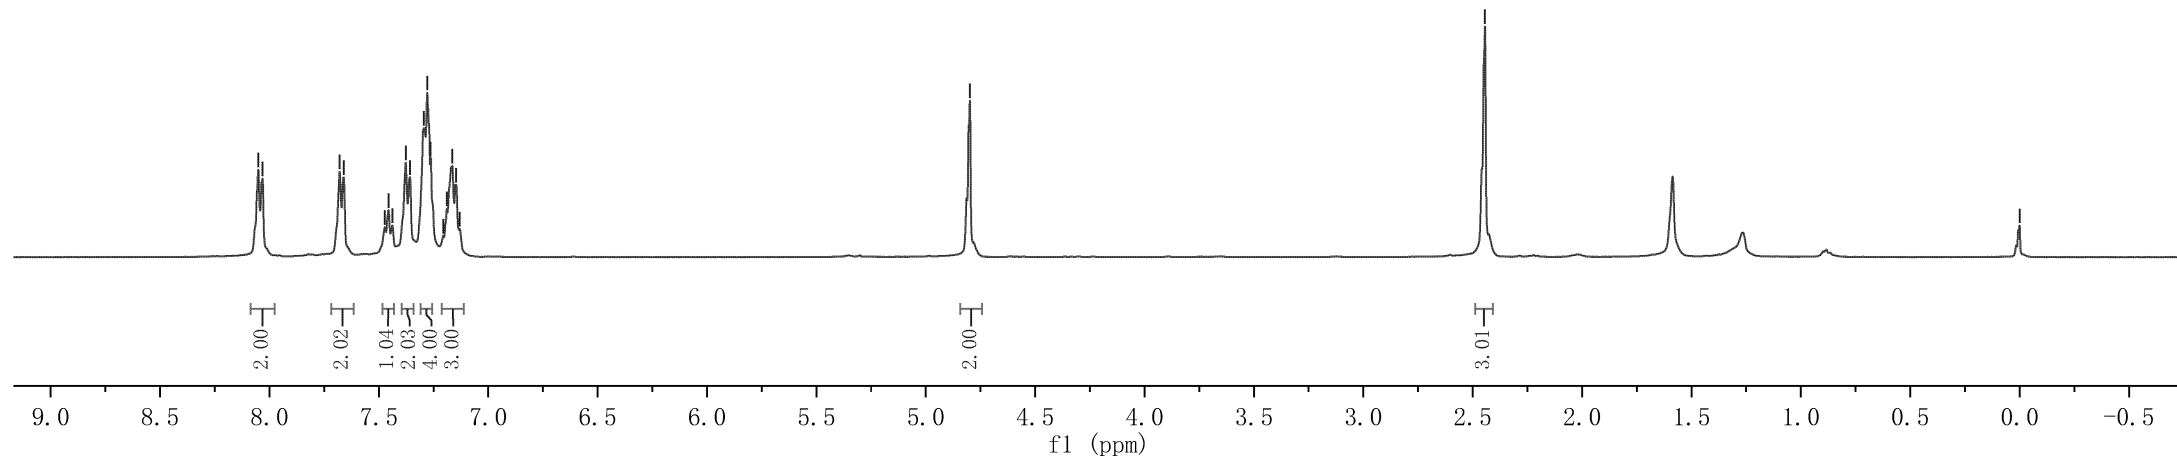

—192.53

—166.63

—147.64

—145.63

—136.39

—134.78

—134.43

—134.18

—129.90

—129.69

—129.44

—129.22

—128.70

—128.60

—128.35

—128.30

77.32

77.00

76.68

—50.63

—21.72

<sup>13</sup>C NMR (100 MHz, CDCl<sub>3</sub>) spectra of **3ya**

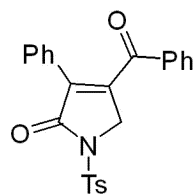

**3ya**

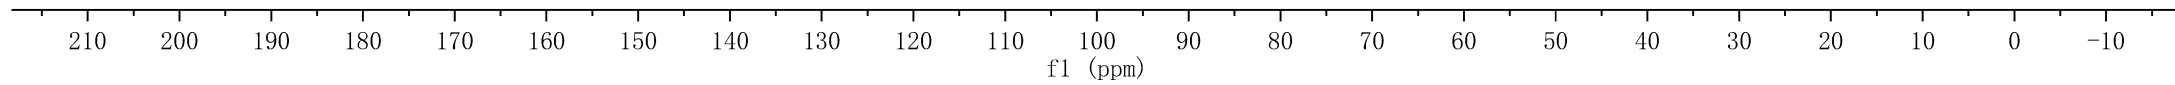



8.025  
8.007  
7.625  
7.608  
7.424  
7.409  
7.354  
7.335  
7.293  
7.285  
7.281

4.725

3.770  
3.753  
3.733  
3.715

2.422

1.439  
1.420

0.000

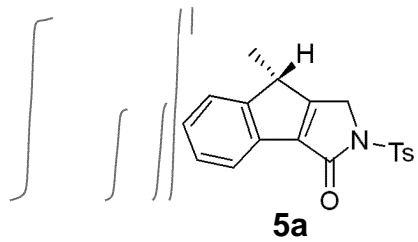

<sup>1</sup>H NMR (400 MHz, CDCl<sub>3</sub>) spectra of **5a**

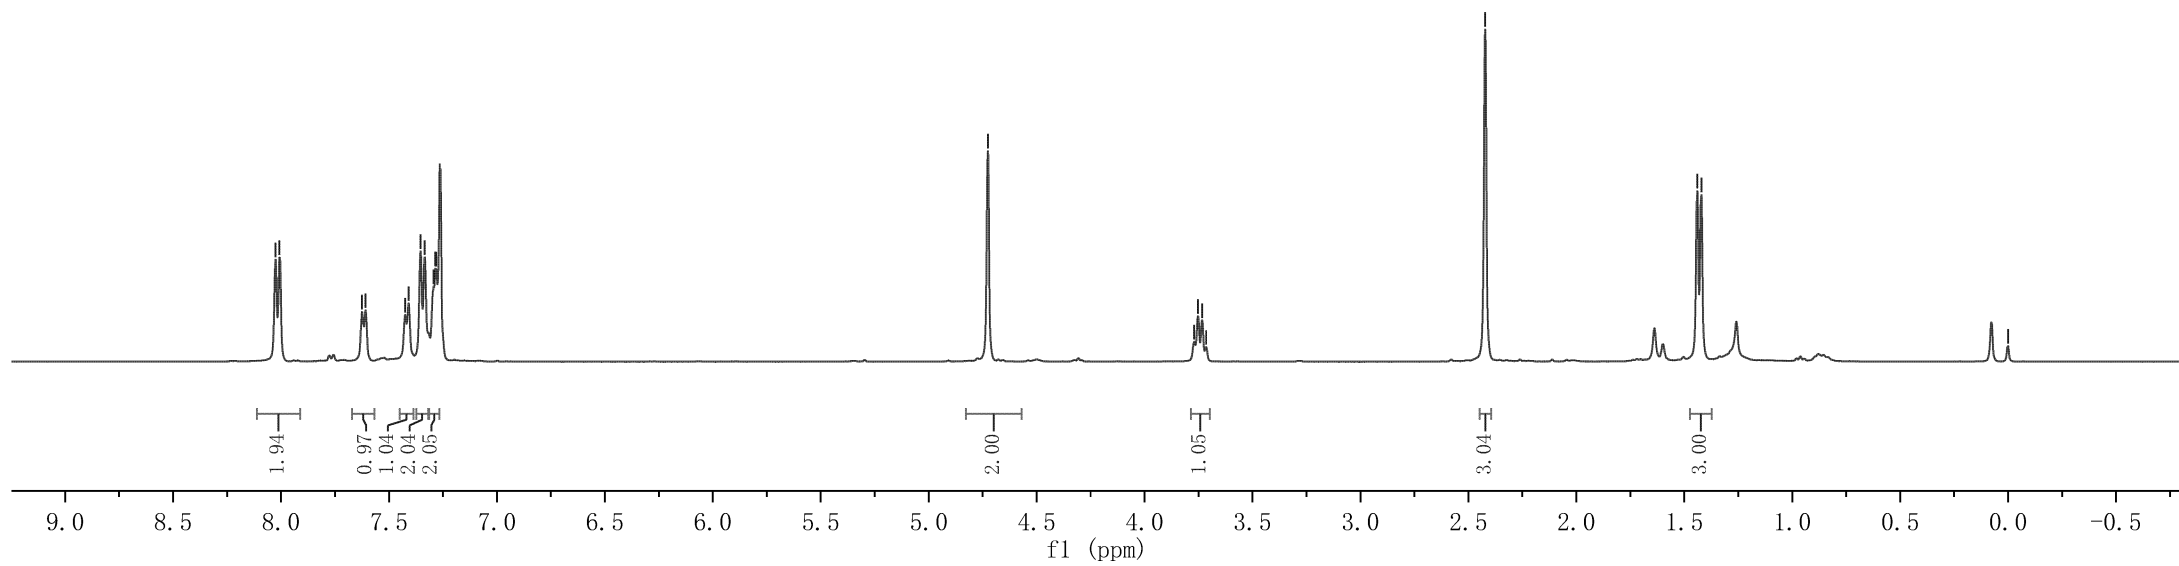

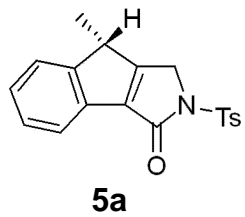

<sup>13</sup>C NMR (100 MHz, CDCl<sub>3</sub>) spectra of **5a**

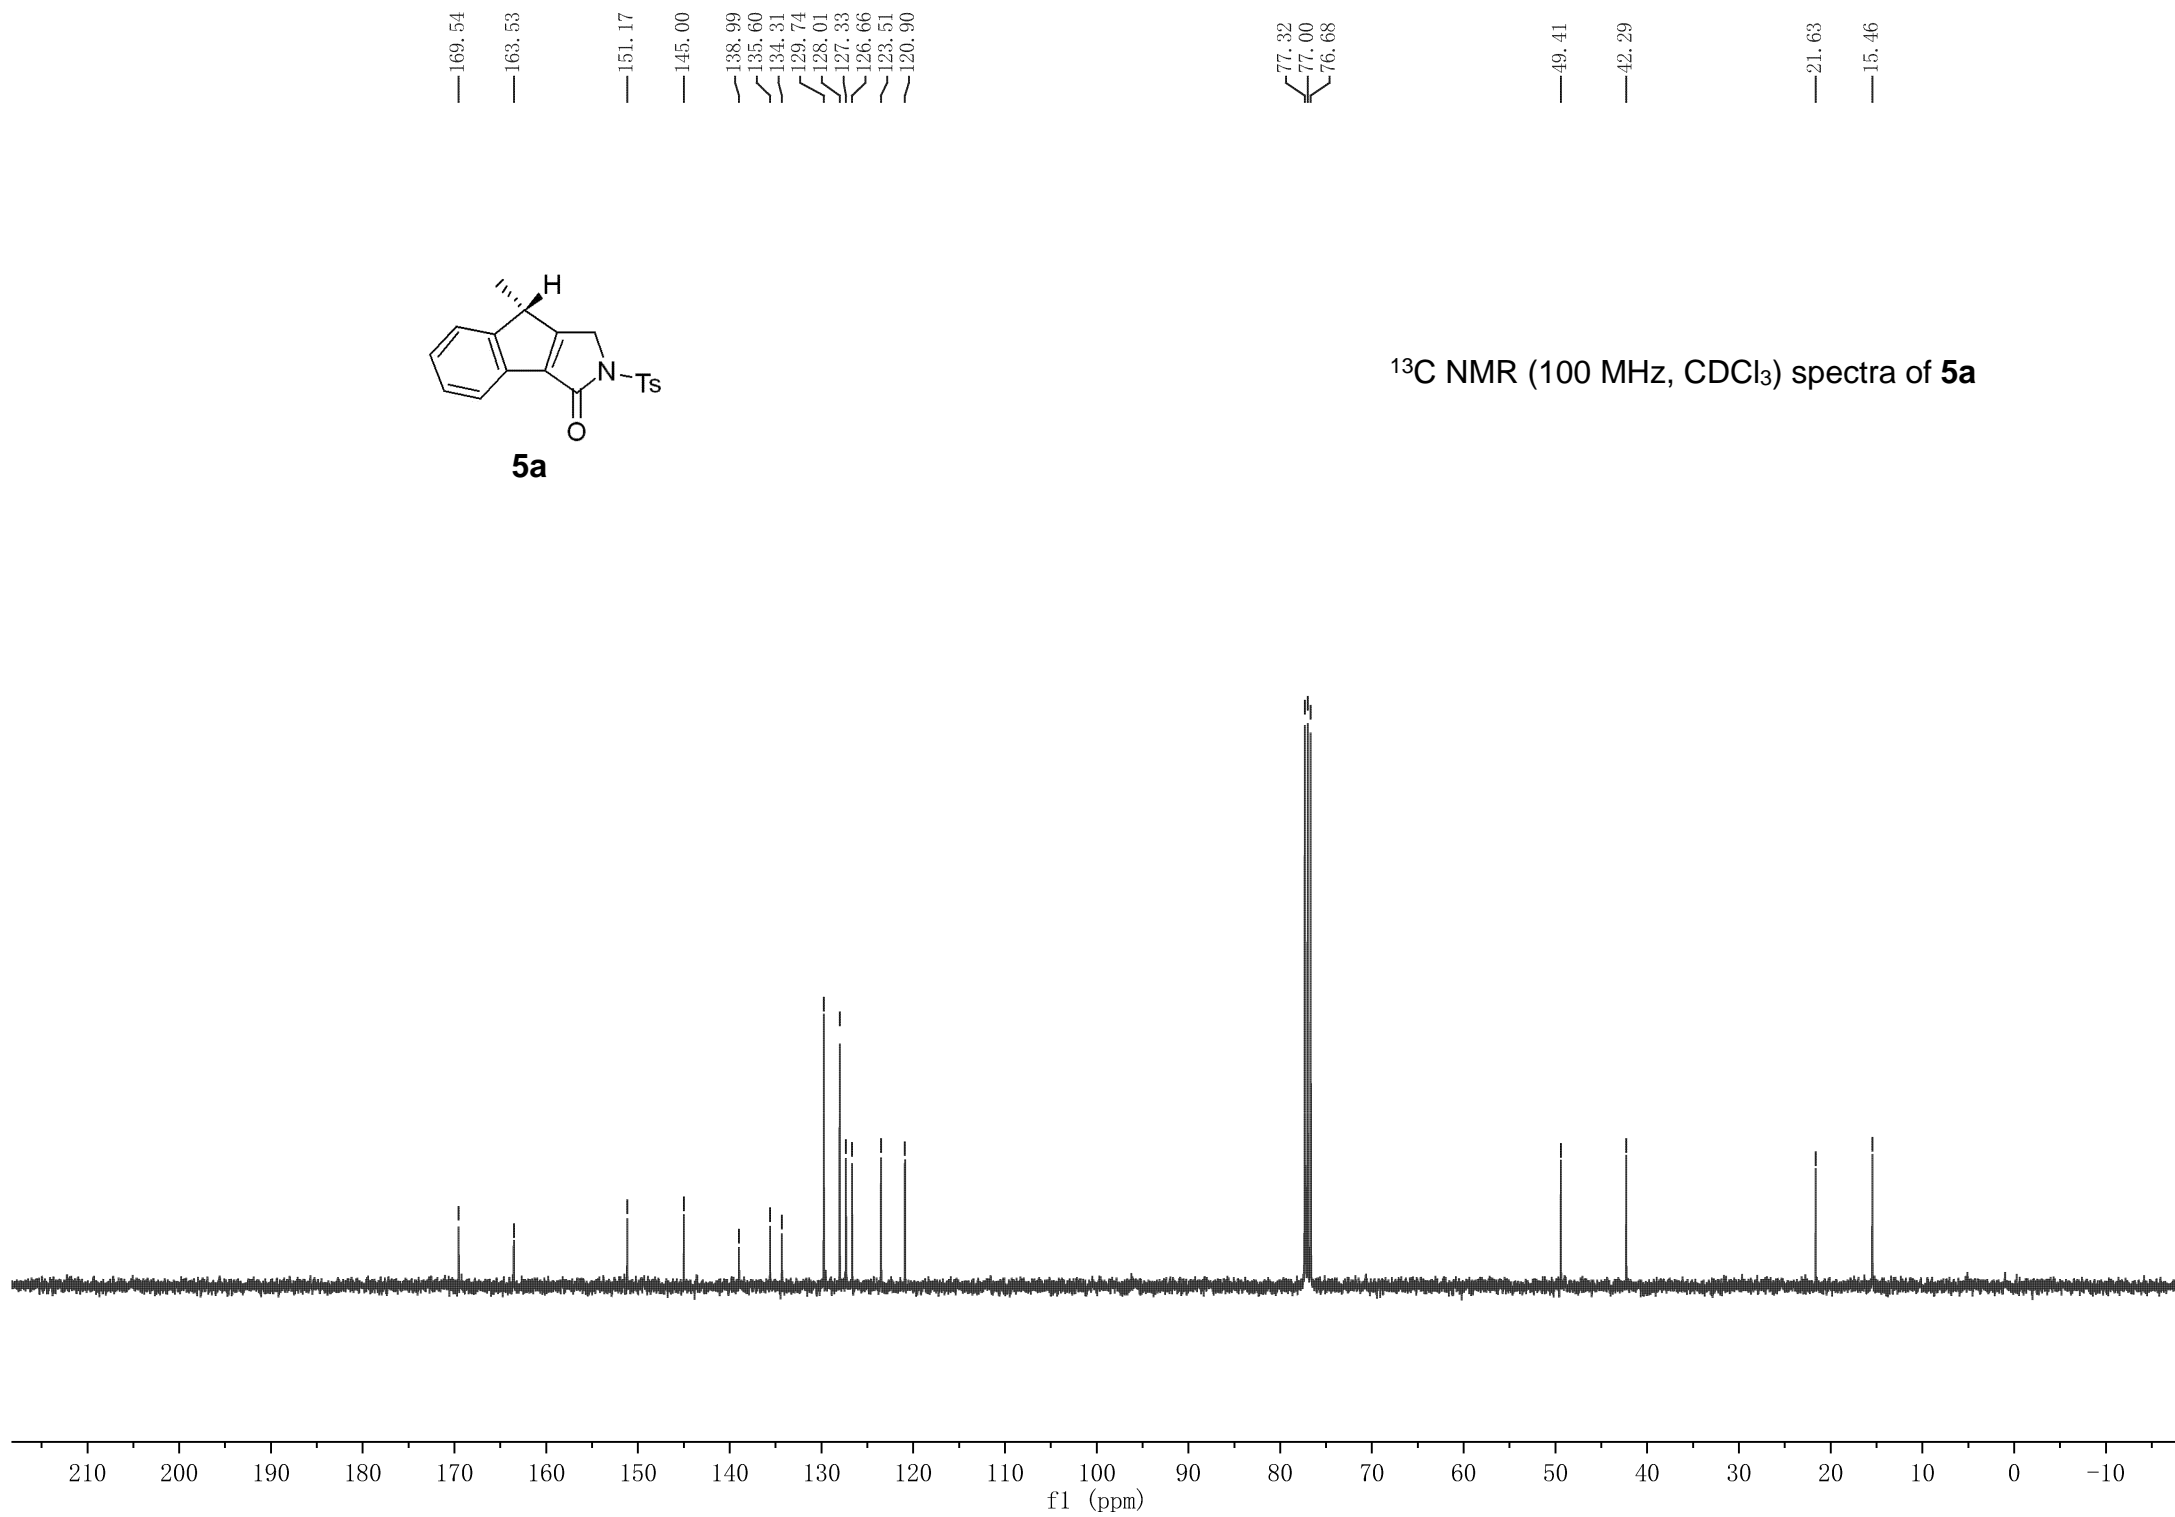

8.148  
8.130  
7.657  
7.638  
7.623  
7.608  
7.574  
7.556  
7.537  
7.426  
7.410  
7.314  
7.286  
7.259

4.738

3.776  
3.758  
3.739  
3.722

1.443  
1.425

0.000

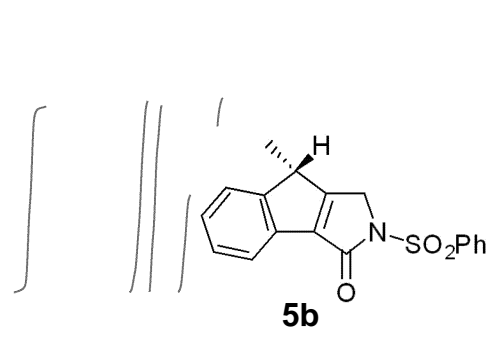

<sup>1</sup>H NMR (400 MHz, CDCl<sub>3</sub>) spectra of **5b**

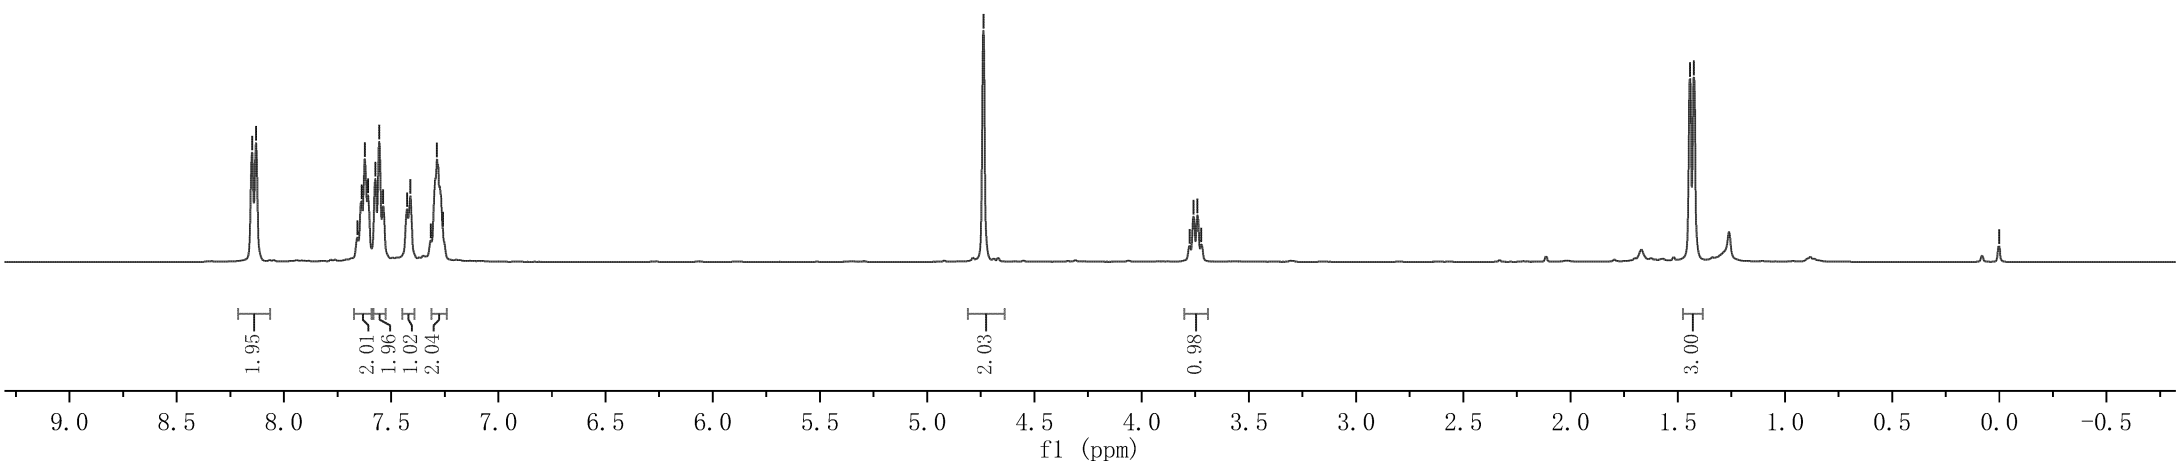

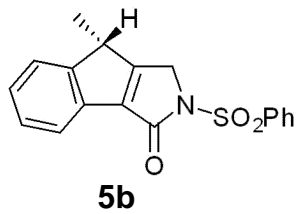

<sup>13</sup>C NMR (100 MHz, CDCl<sub>3</sub>) spectra of **5b**

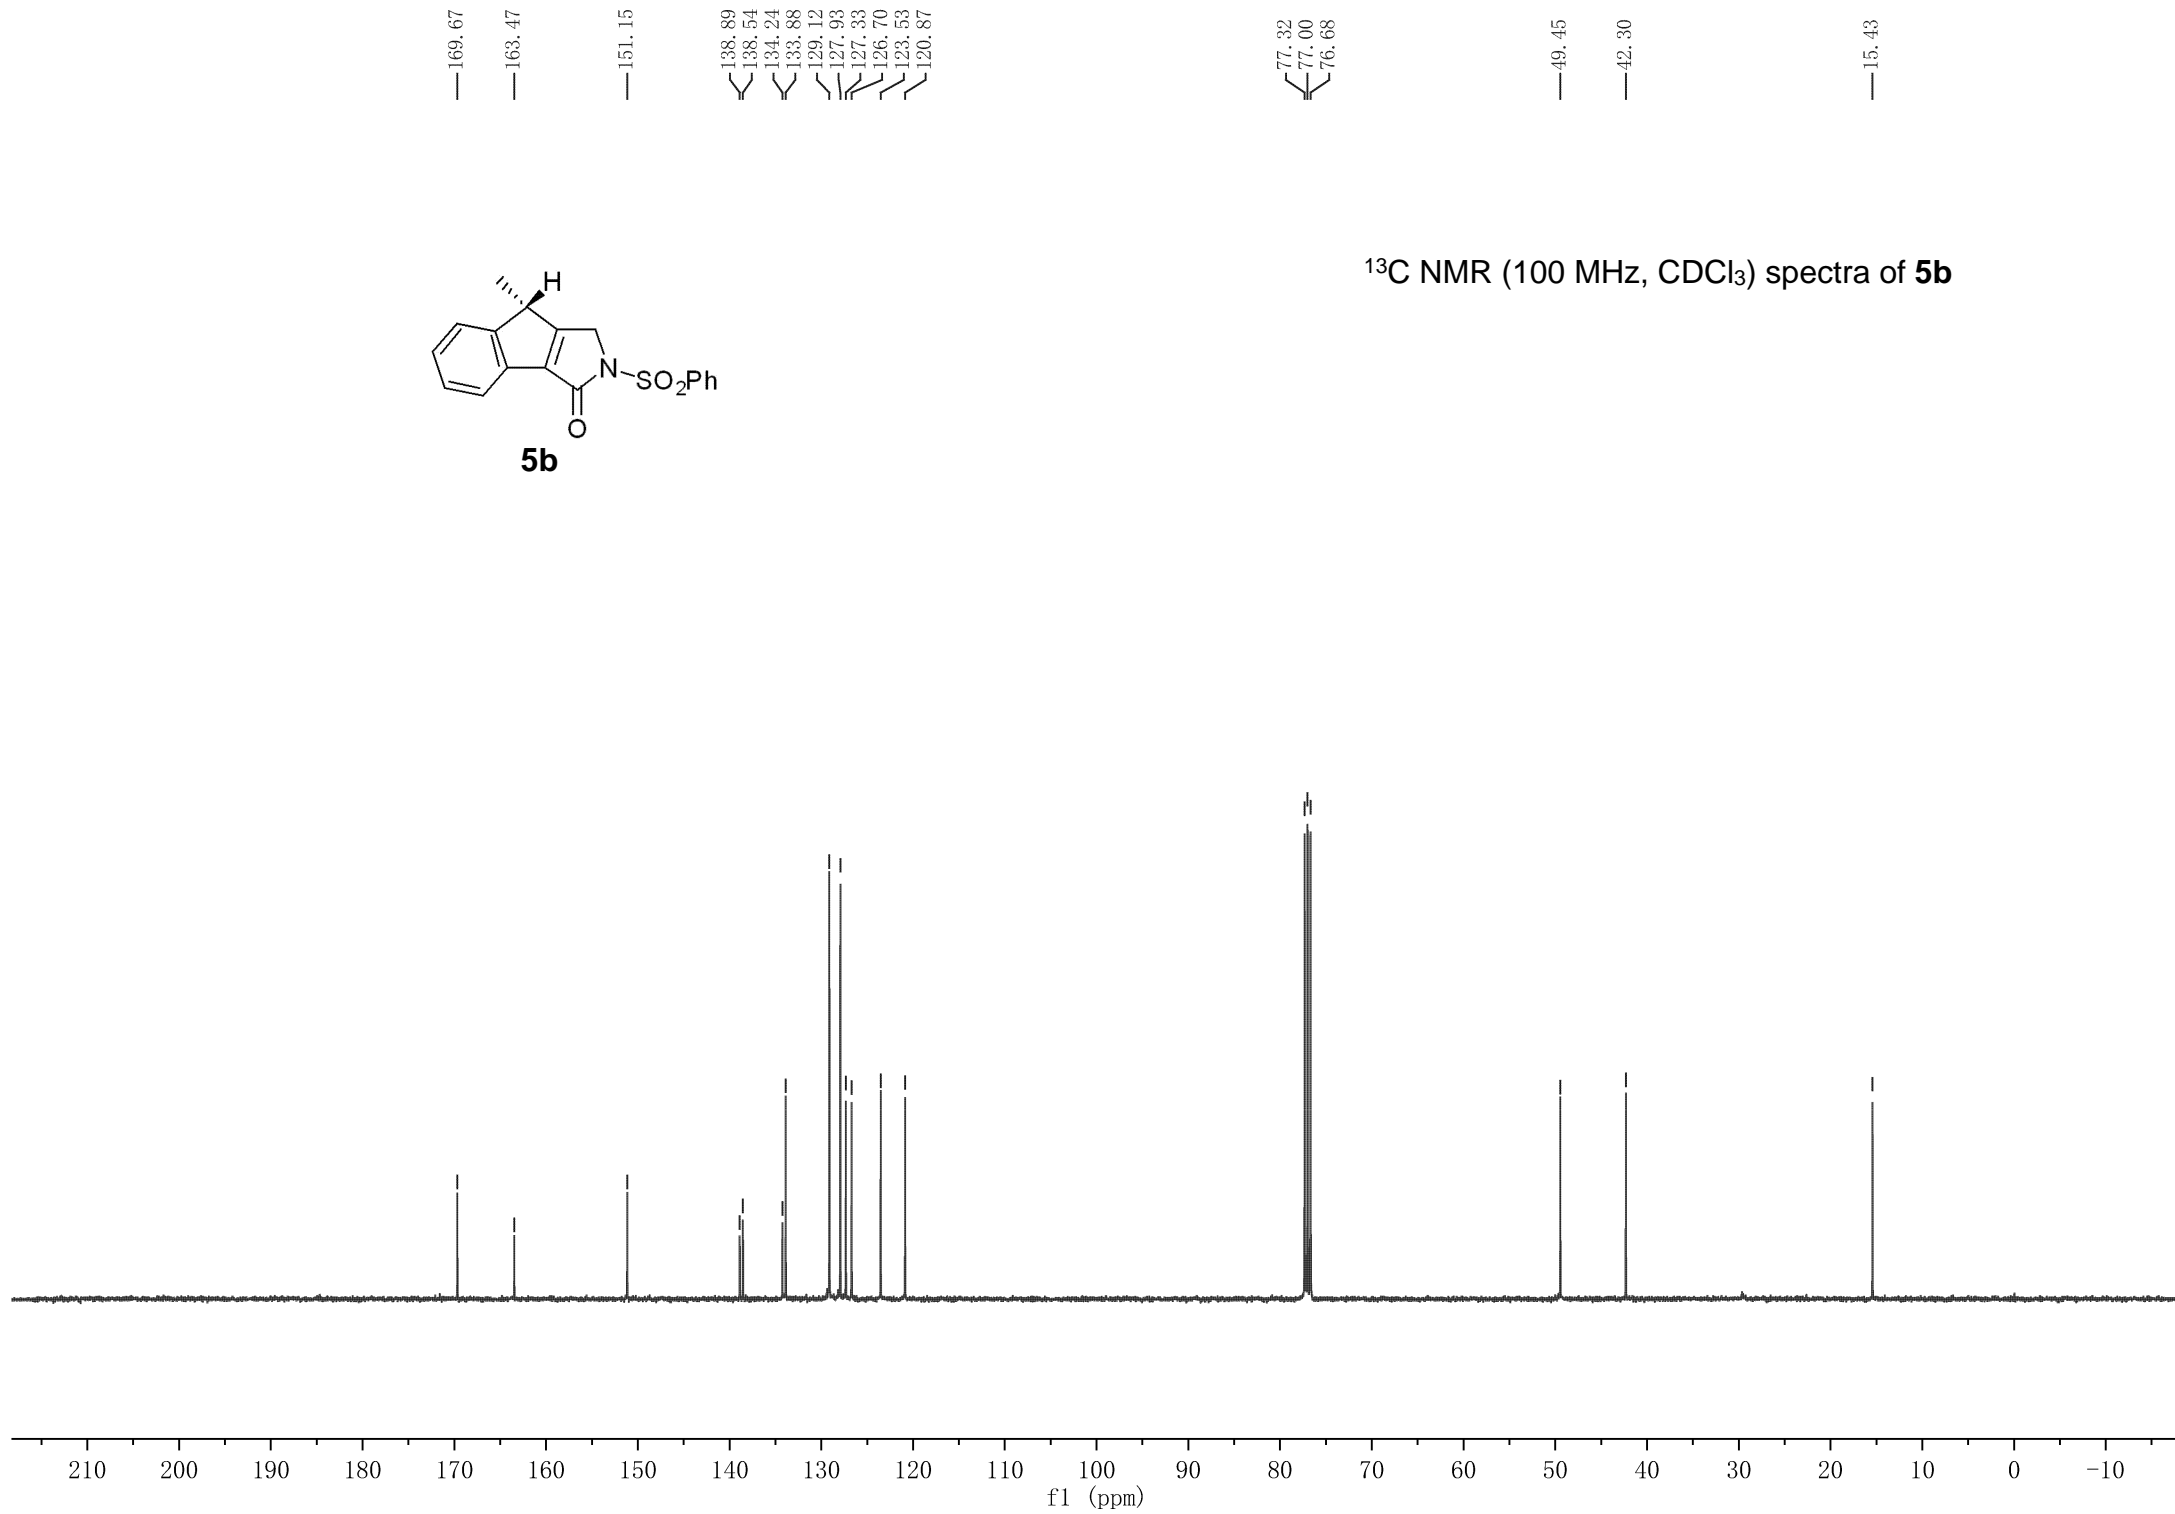

8.086  
8.068  
7.634  
7.616  
7.429  
7.413  
7.322  
7.289  
7.266  
7.017  
6.999

4.726

3.864  
3.773  
3.755  
3.736  
3.719

1.446  
1.427

0.000

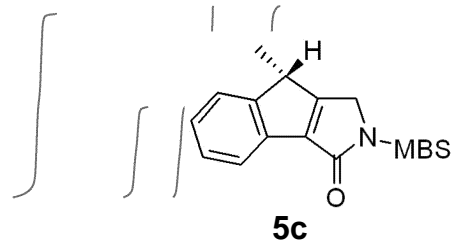

<sup>1</sup>H NMR (400 MHz, CDCl<sub>3</sub>) spectra of **5c**

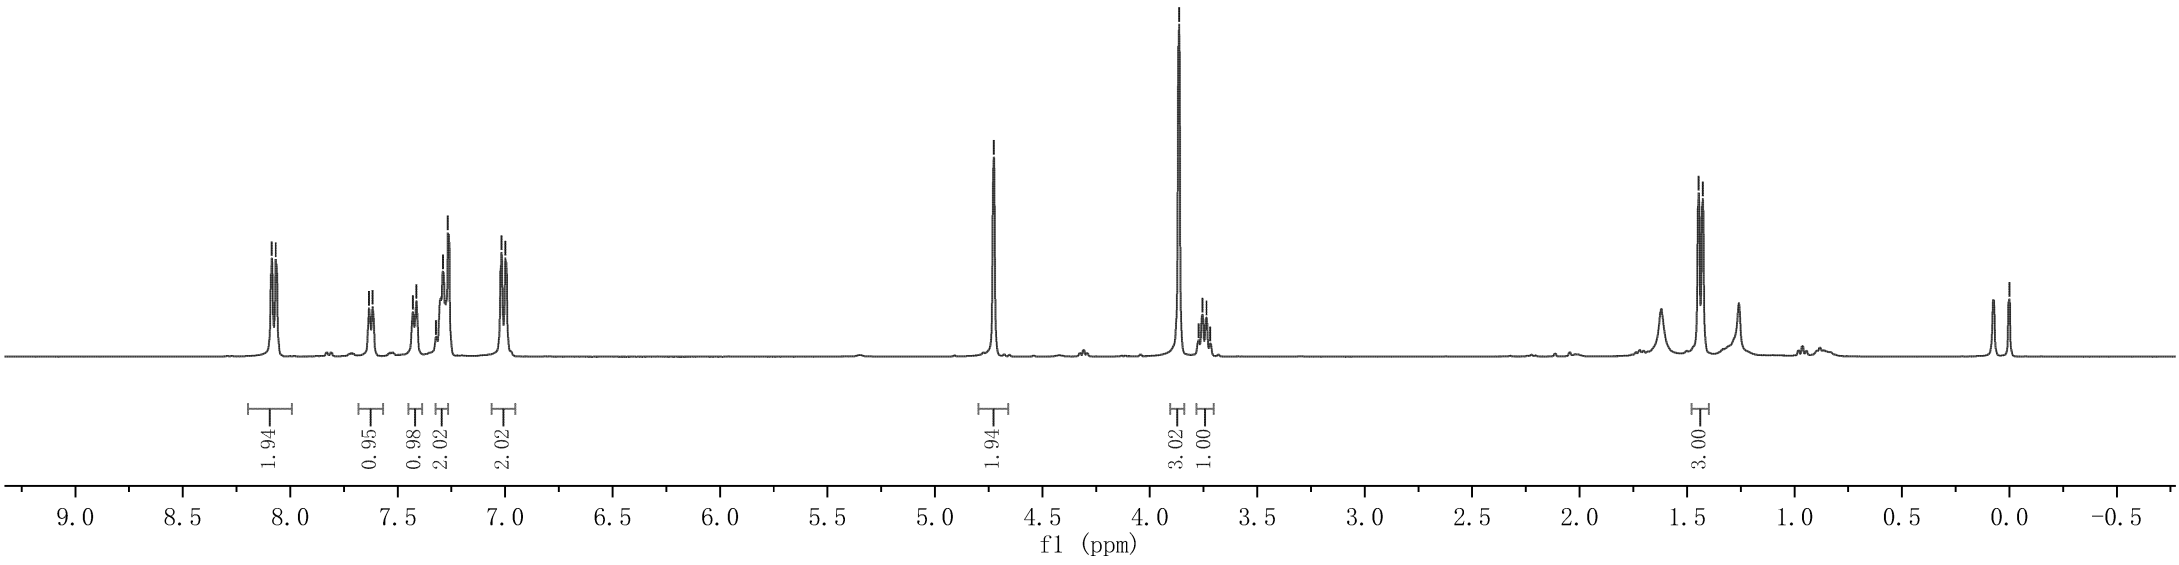

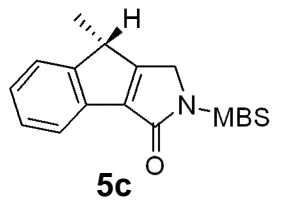

<sup>13</sup>C NMR (100 MHz, CDCl<sub>3</sub>) spectra of **5c**

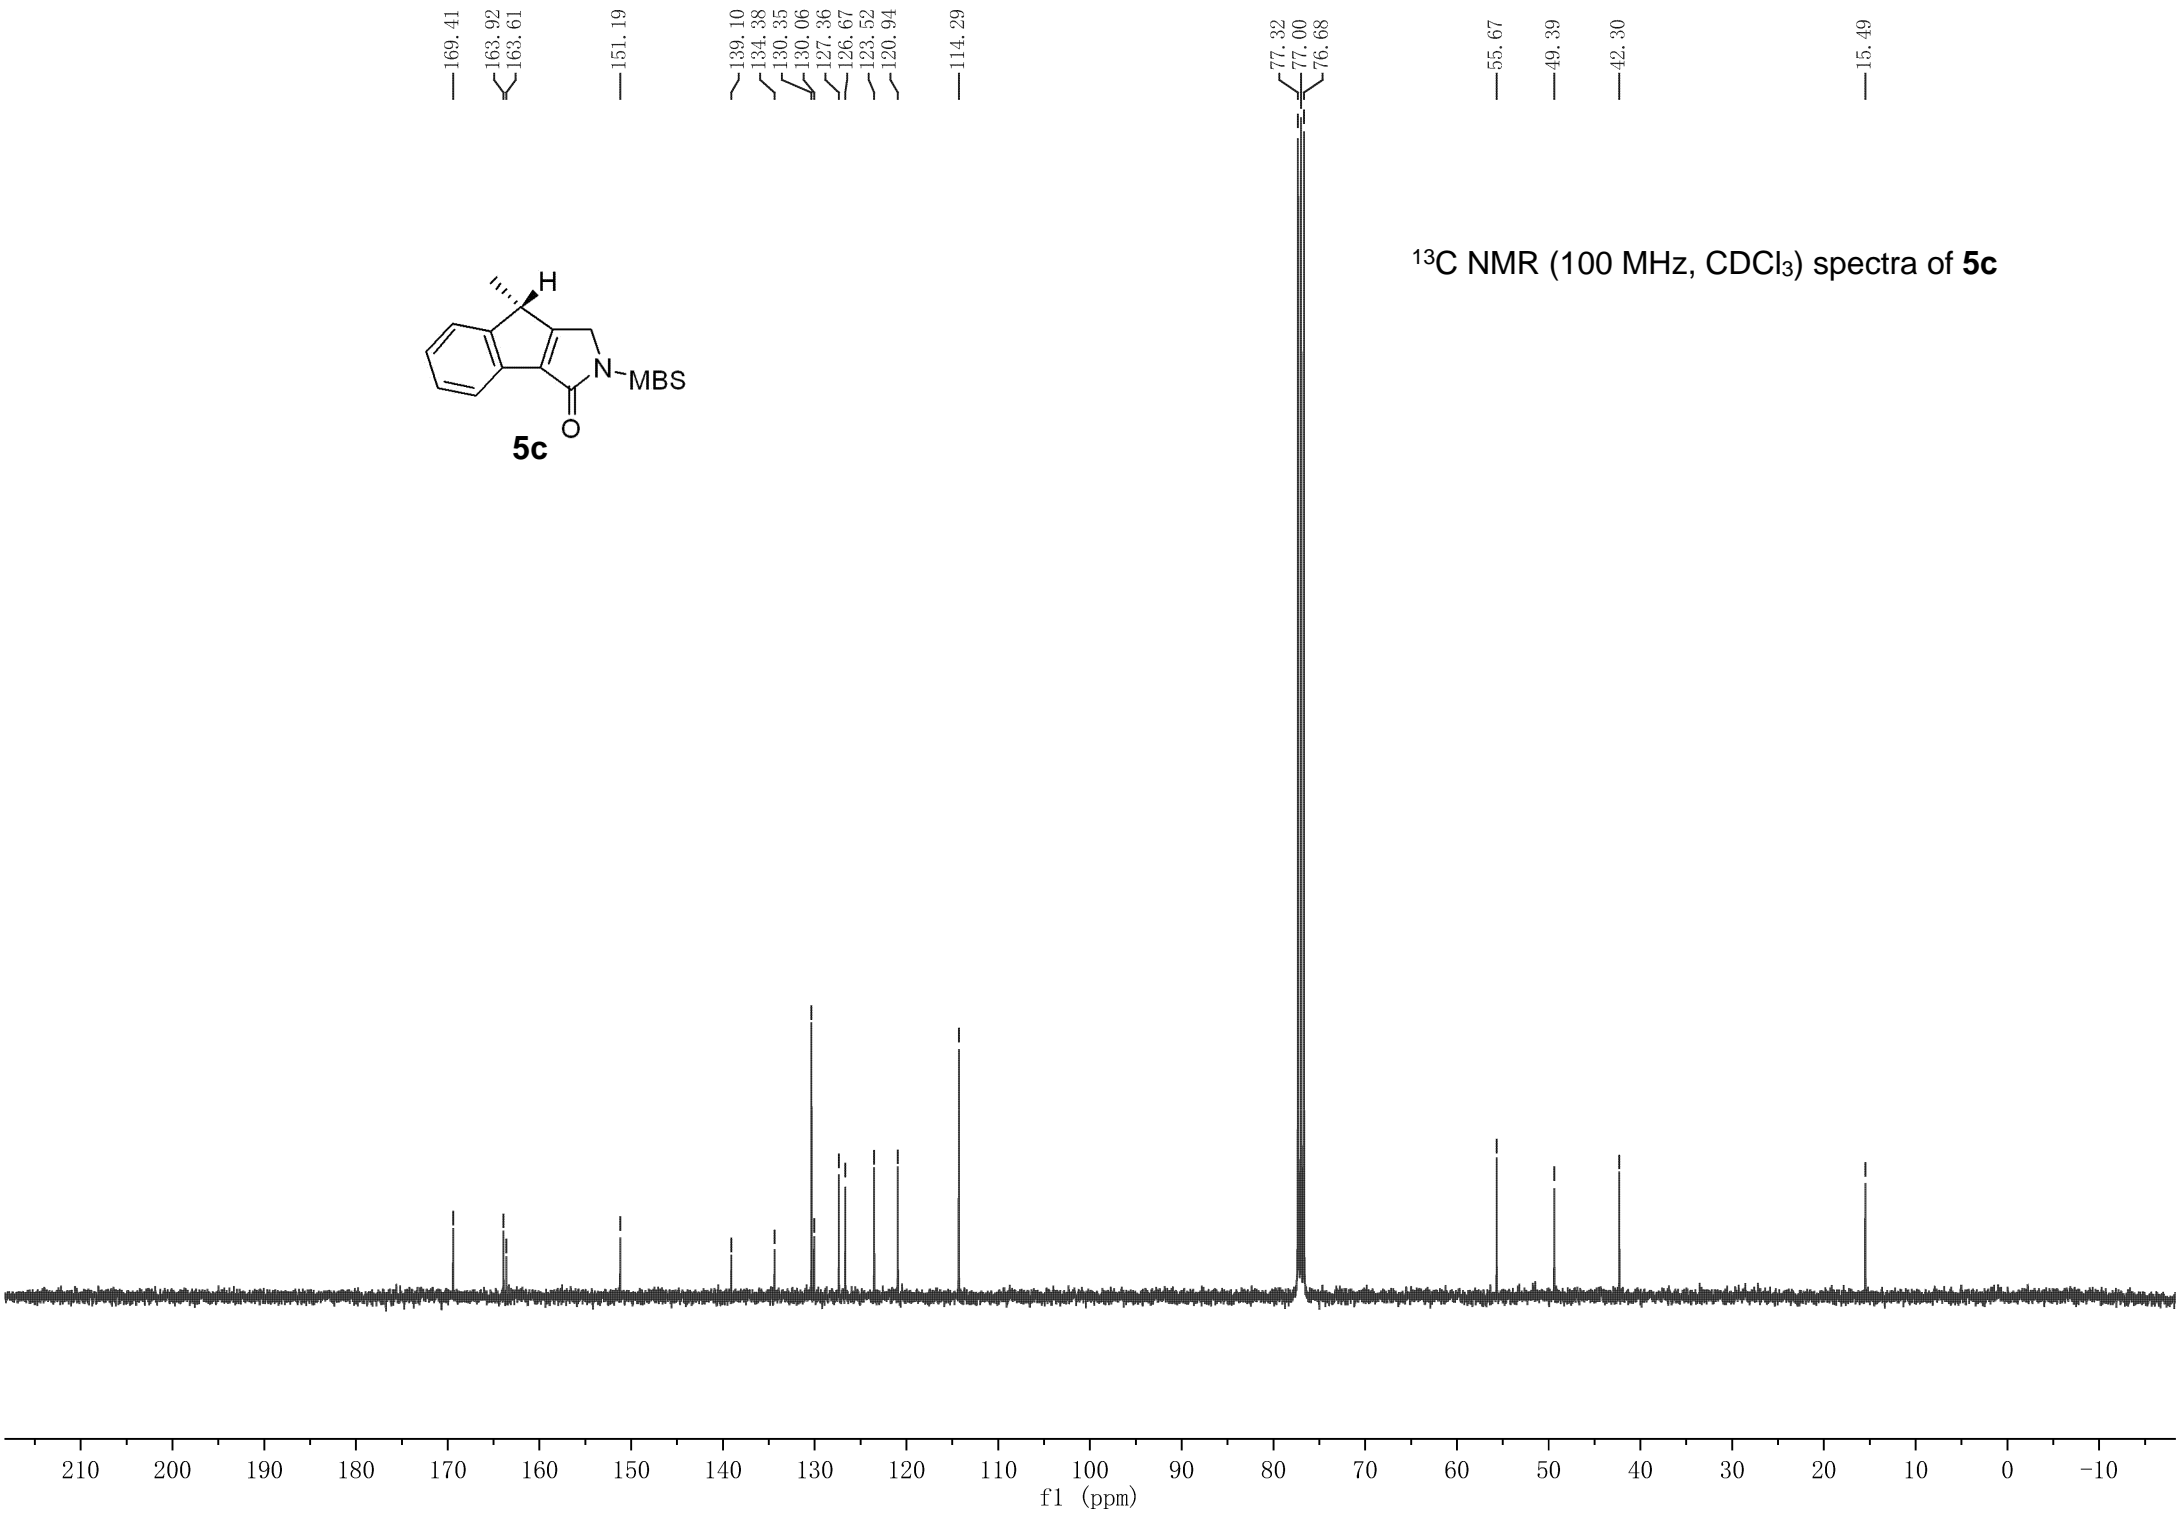

7.933  
7.915  
7.621  
7.603  
7.545  
7.528  
7.356  
7.339  
7.250  
7.231  
7.220  
7.216  
7.209

4.649

3.709  
3.689  
3.670  
3.651

1.372  
1.354

0.000

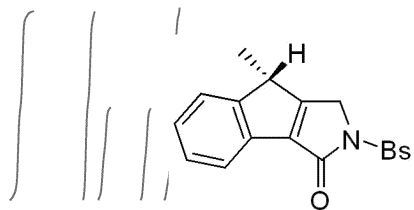

**5d**

<sup>1</sup>H NMR (400 MHz, CDCl<sub>3</sub>) spectra of **5d**

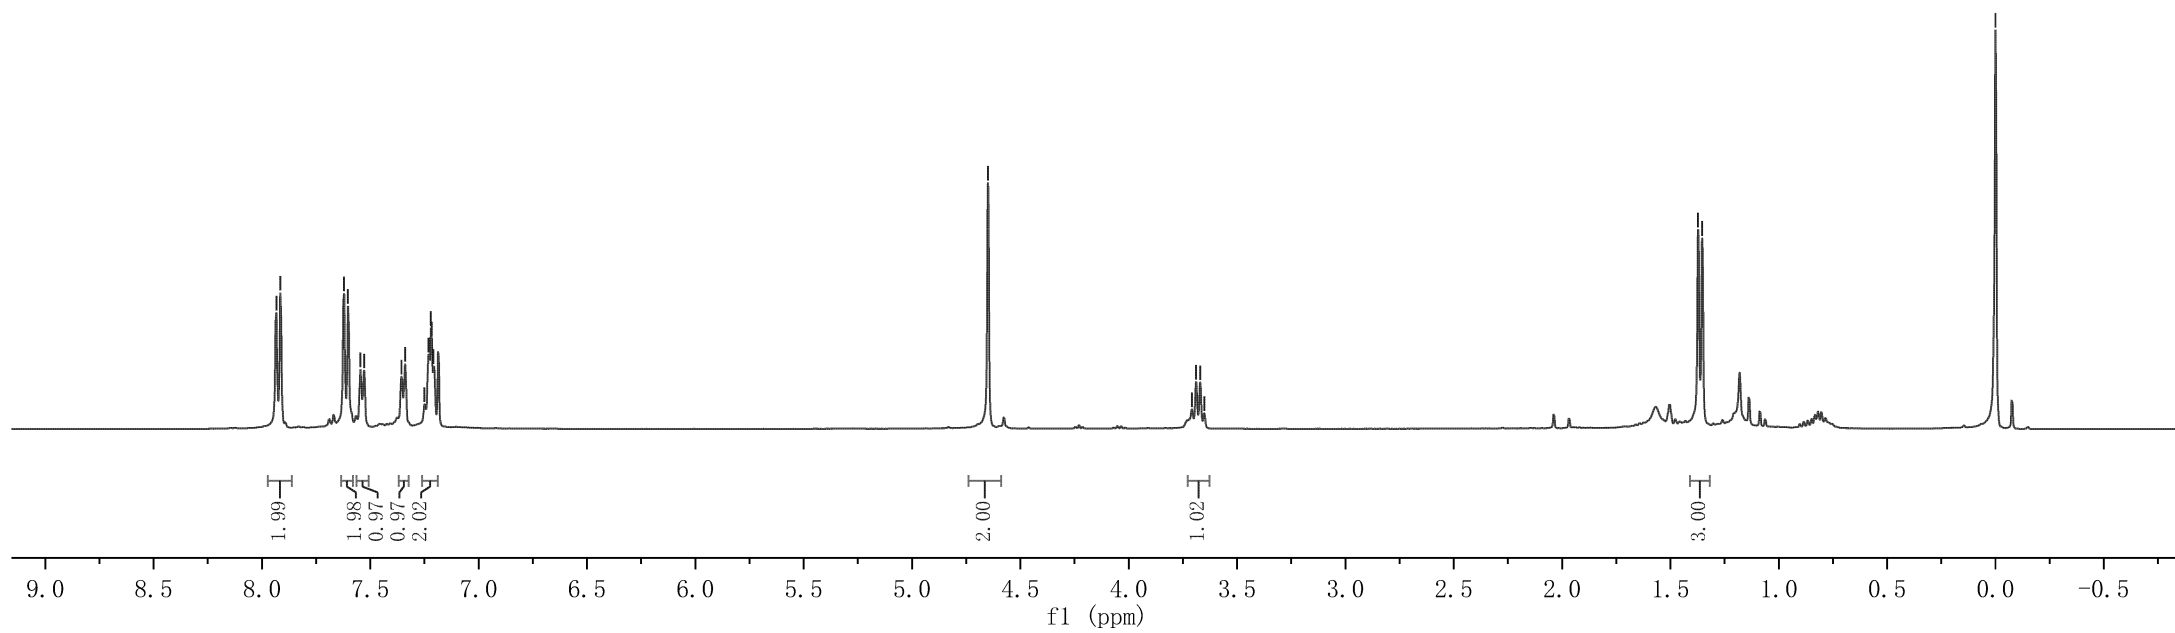

—169.79  
—163.47  
—151.12  
—138.86  
—137.47  
—134.12  
—132.44  
—129.54  
—129.25  
—127.41  
—126.82  
—123.56  
—120.93

77.32  
77.00  
76.68

—49.48  
—42.37

—15.45

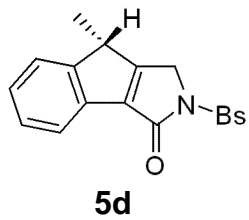

<sup>13</sup>C NMR (100 MHz, CDCl<sub>3</sub>) spectra of **5d**

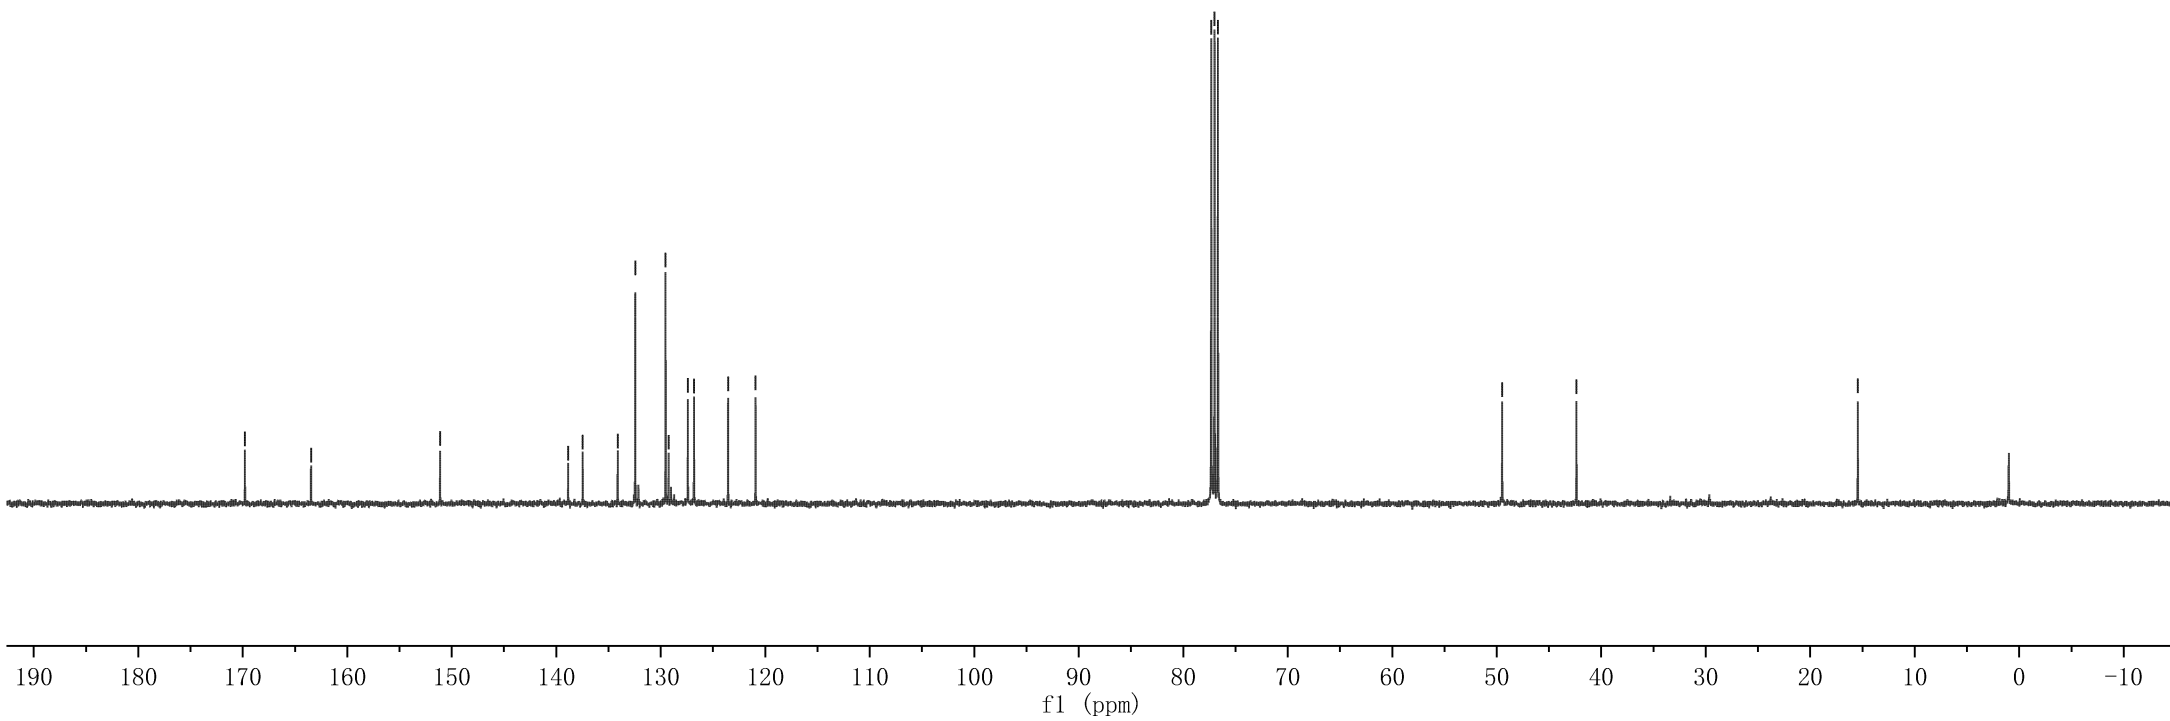



7.946  
7.925  
7.485  
7.473  
7.460  
7.283  
7.265  
7.066  
7.045  
6.948  
6.926  
6.905

4.641

3.692  
3.675  
3.656  
3.638

2.353

1.364  
1.348

0.000

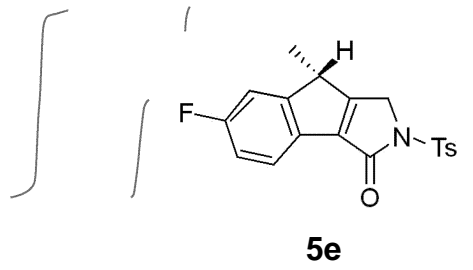

<sup>1</sup>H NMR (400 MHz, CDCl<sub>3</sub>) spectra of **5e**

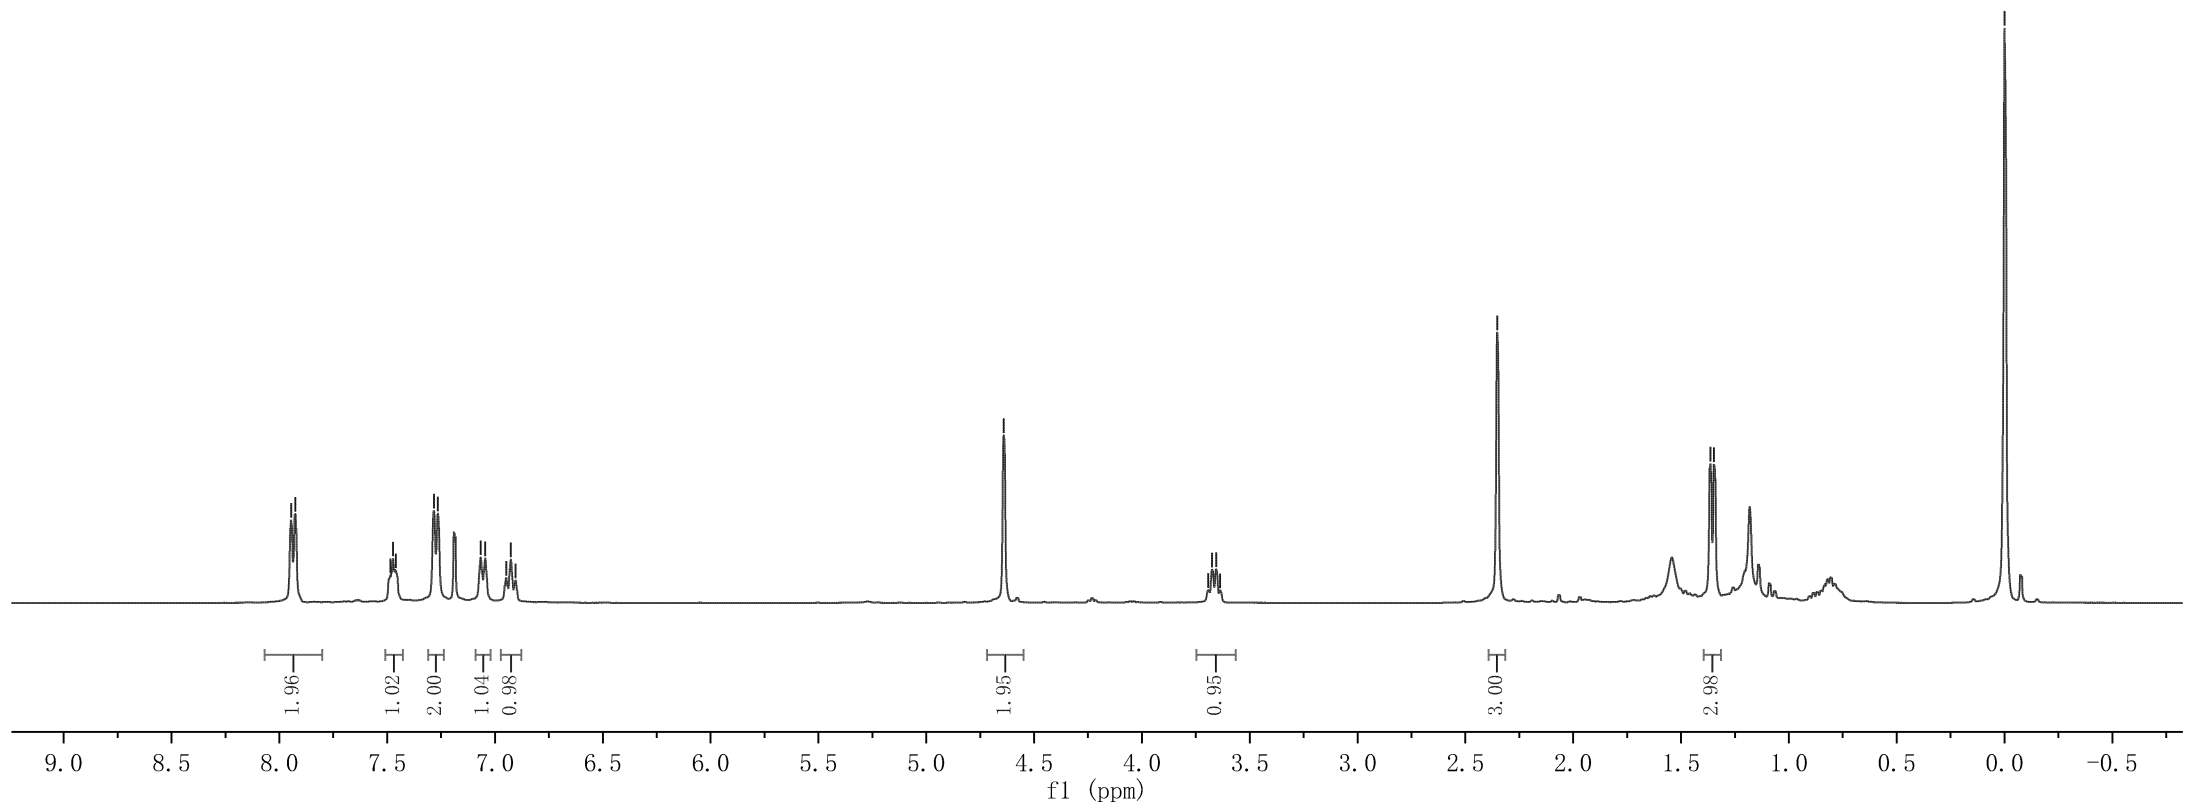

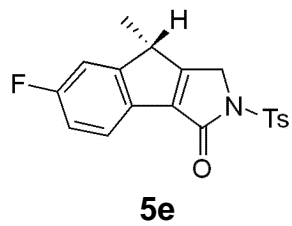

168.74  
163.46  
163.26  
161.01  
153.52  
153.44  
145.09  
138.44  
135.62  
130.37  
130.35  
129.78  
128.07  
121.84  
121.75  
114.45  
114.22  
111.77  
111.53

77.32  
77.00  
76.68

49.31

42.44

21.66

15.45

<sup>13</sup>C NMR (100 MHz, CDCl<sub>3</sub>) spectra of **5e**

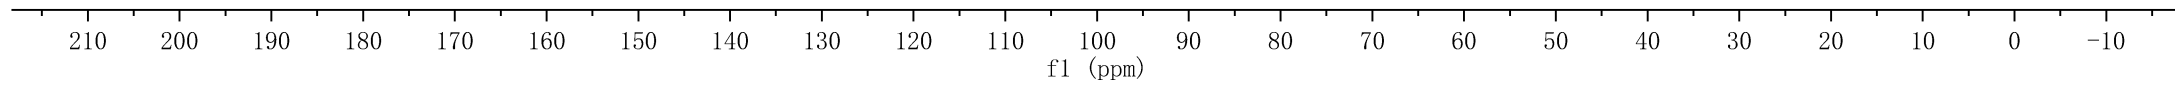

8.027  
8.009  
7.541  
7.522  
7.403  
7.366  
7.347  
7.302  
7.282  
7.265

4.725

3.781  
3.762  
3.743  
3.725

2.433

1.446  
1.427

0.000

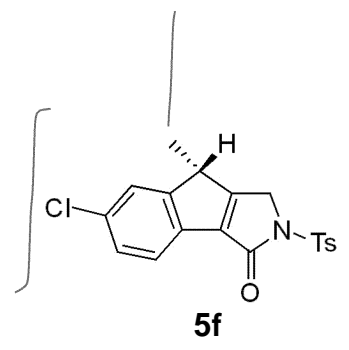

<sup>1</sup>H NMR (400 MHz, CDCl<sub>3</sub>) spectra of **5f**

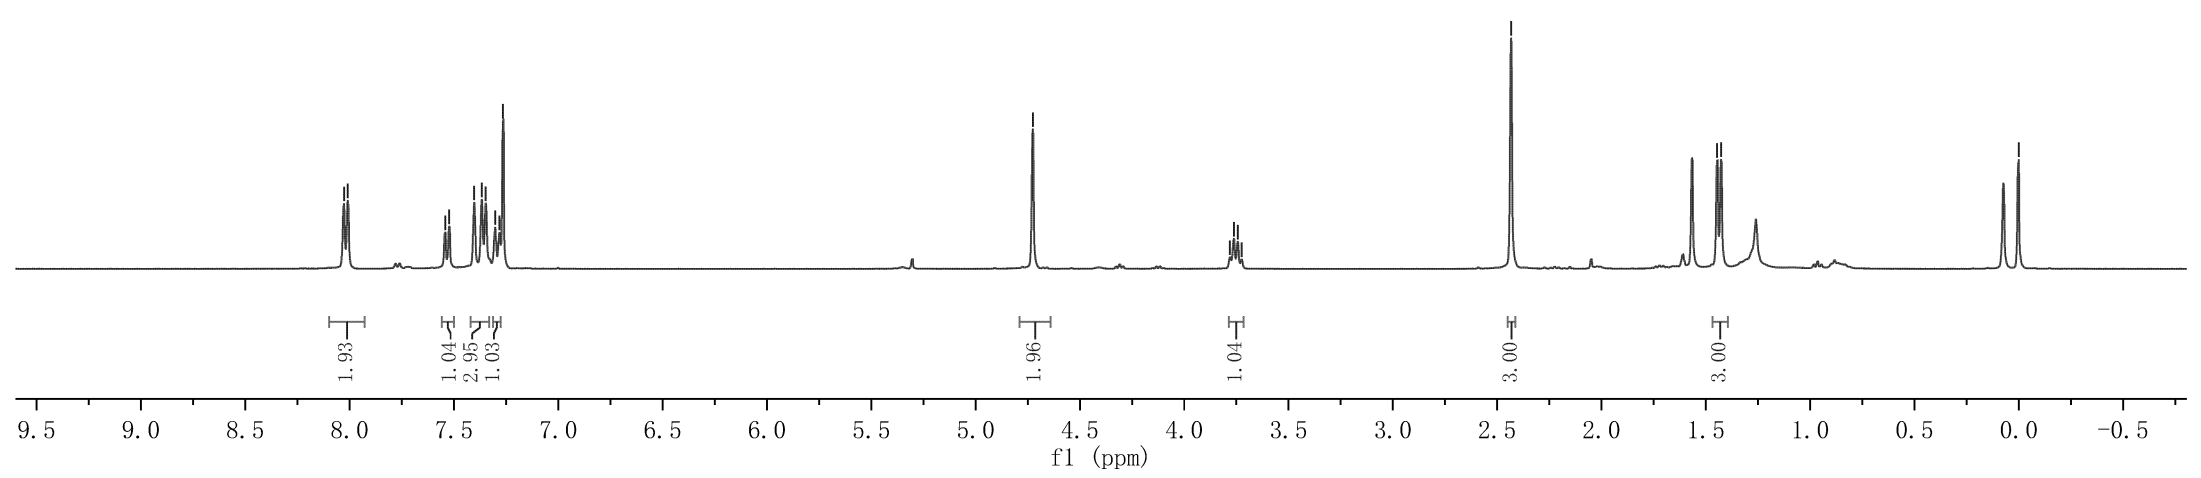

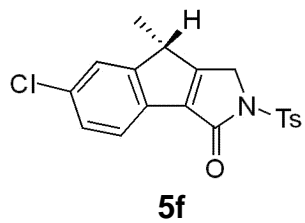

<sup>13</sup>C NMR (100 MHz, CDCl<sub>3</sub>) spectra of **5f**

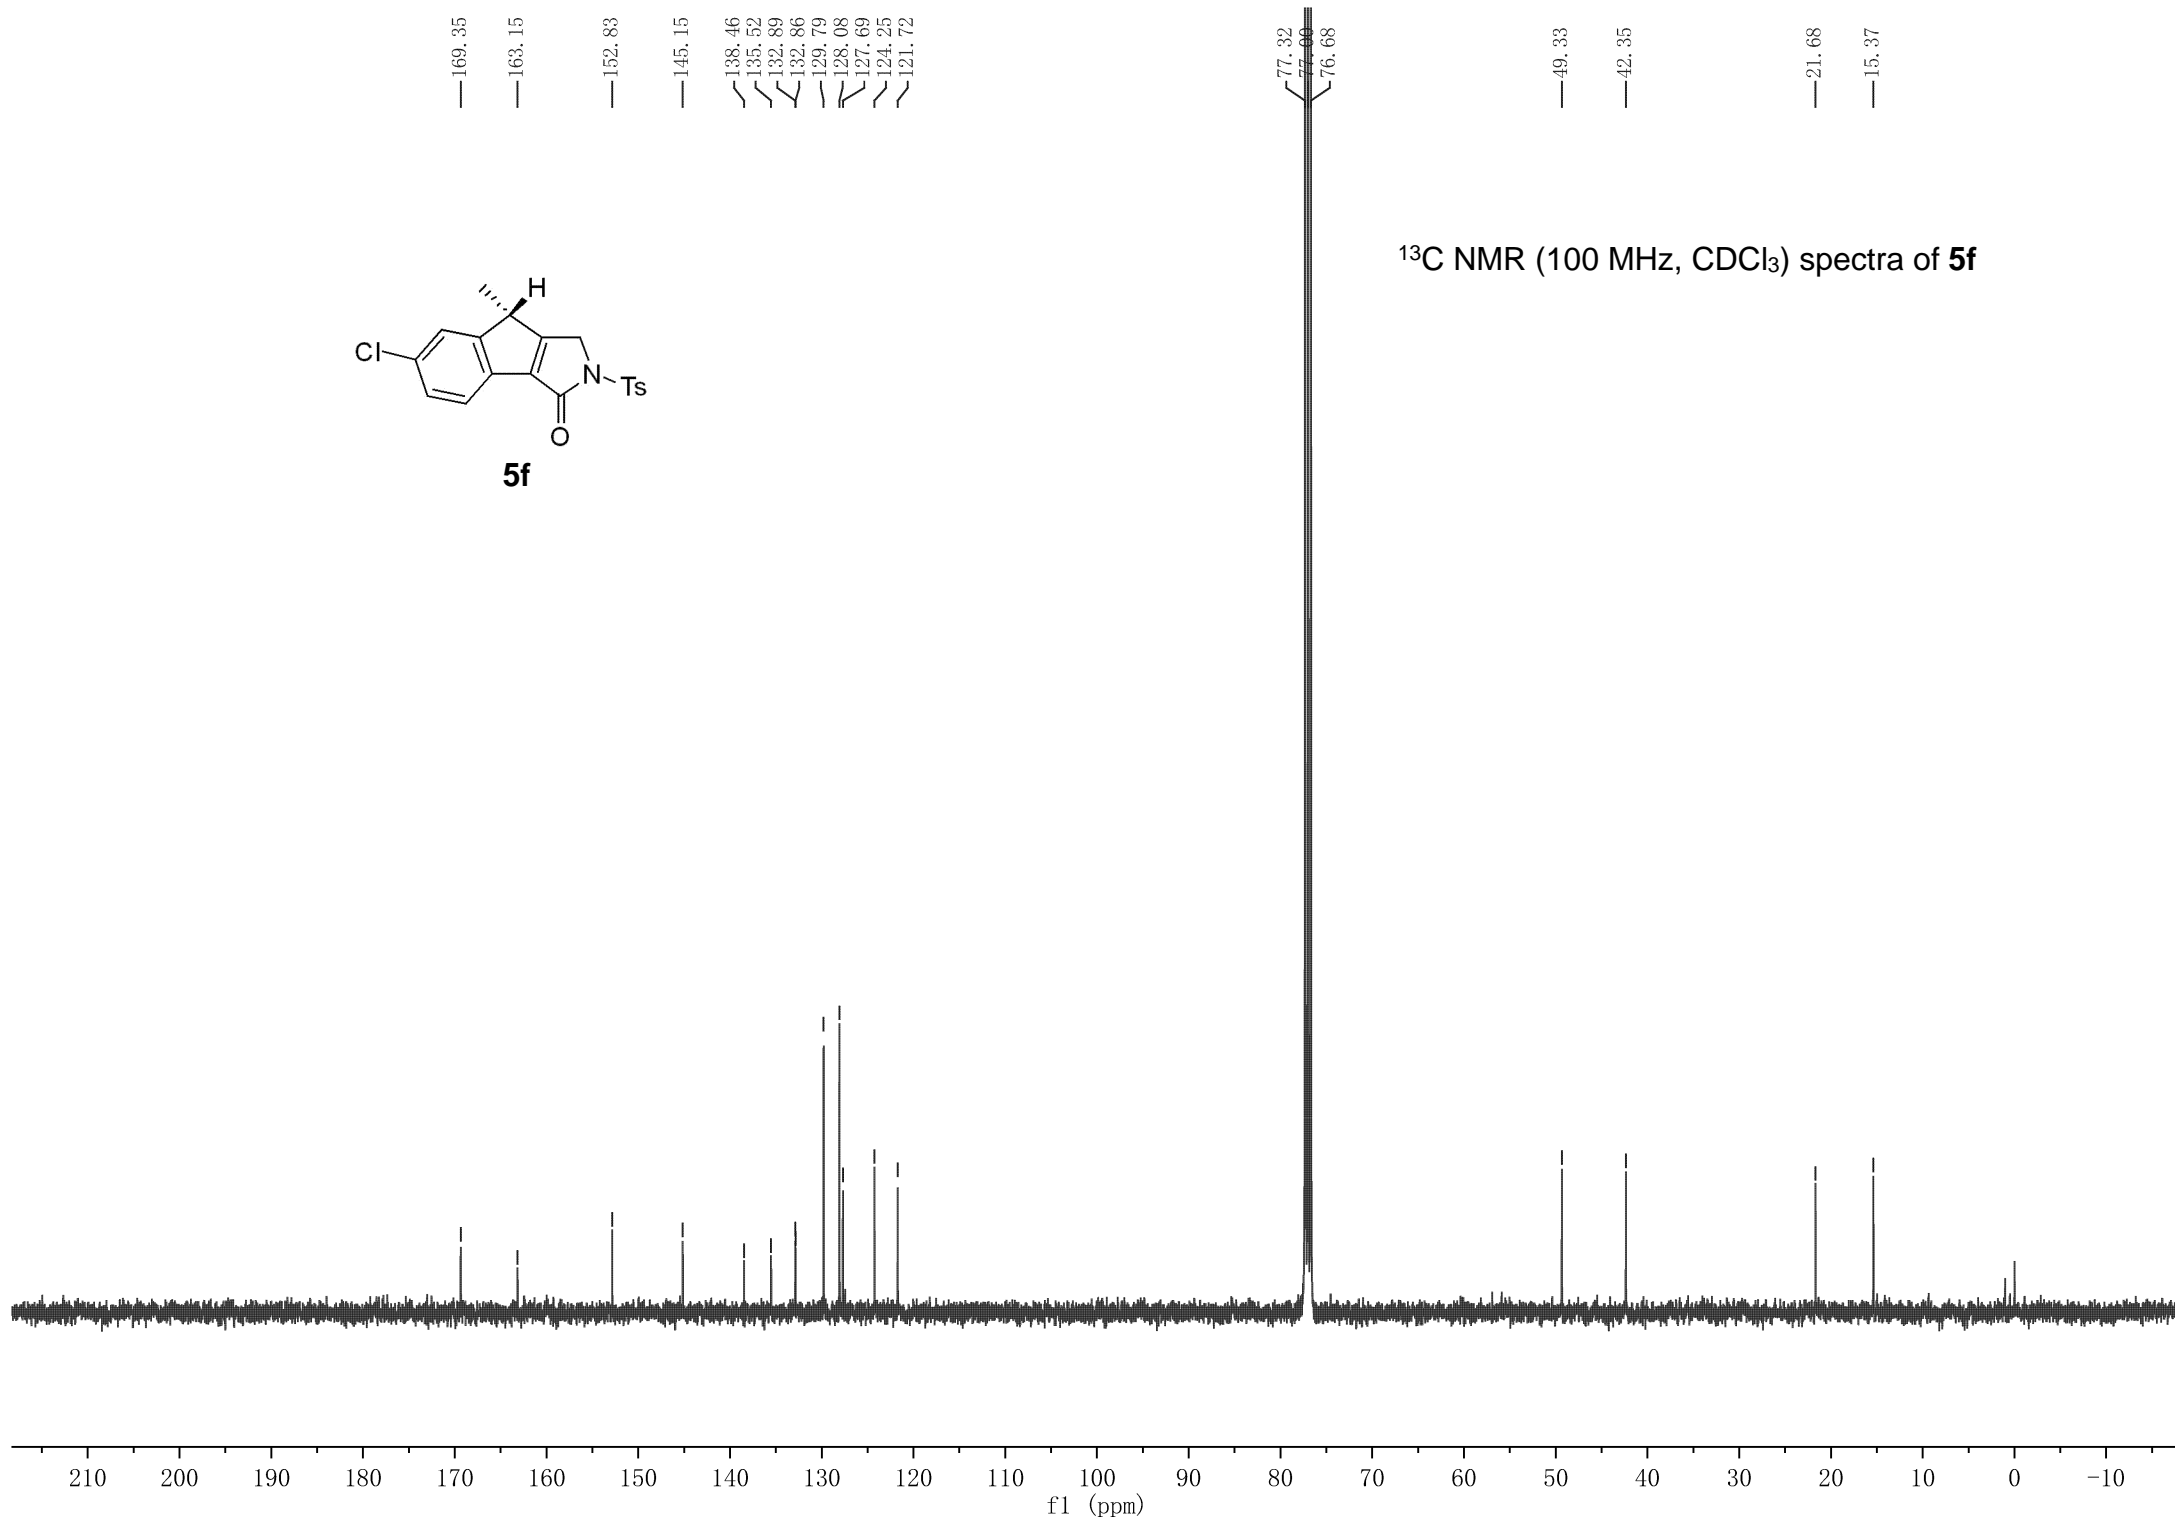

7.950  
7.929  
7.483  
7.415  
7.395  
7.378  
7.375  
7.358  
7.354  
7.290  
7.270

4.642

3.702  
3.683  
3.664  
3.645

2.357

1.368  
1.349

0.000

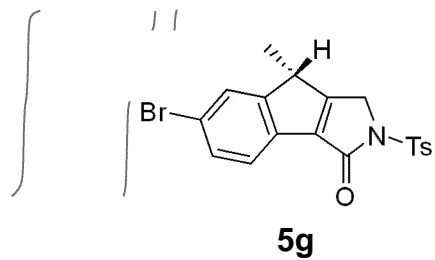

<sup>1</sup>H NMR (400 MHz, CDCl<sub>3</sub>) spectra of **5g**

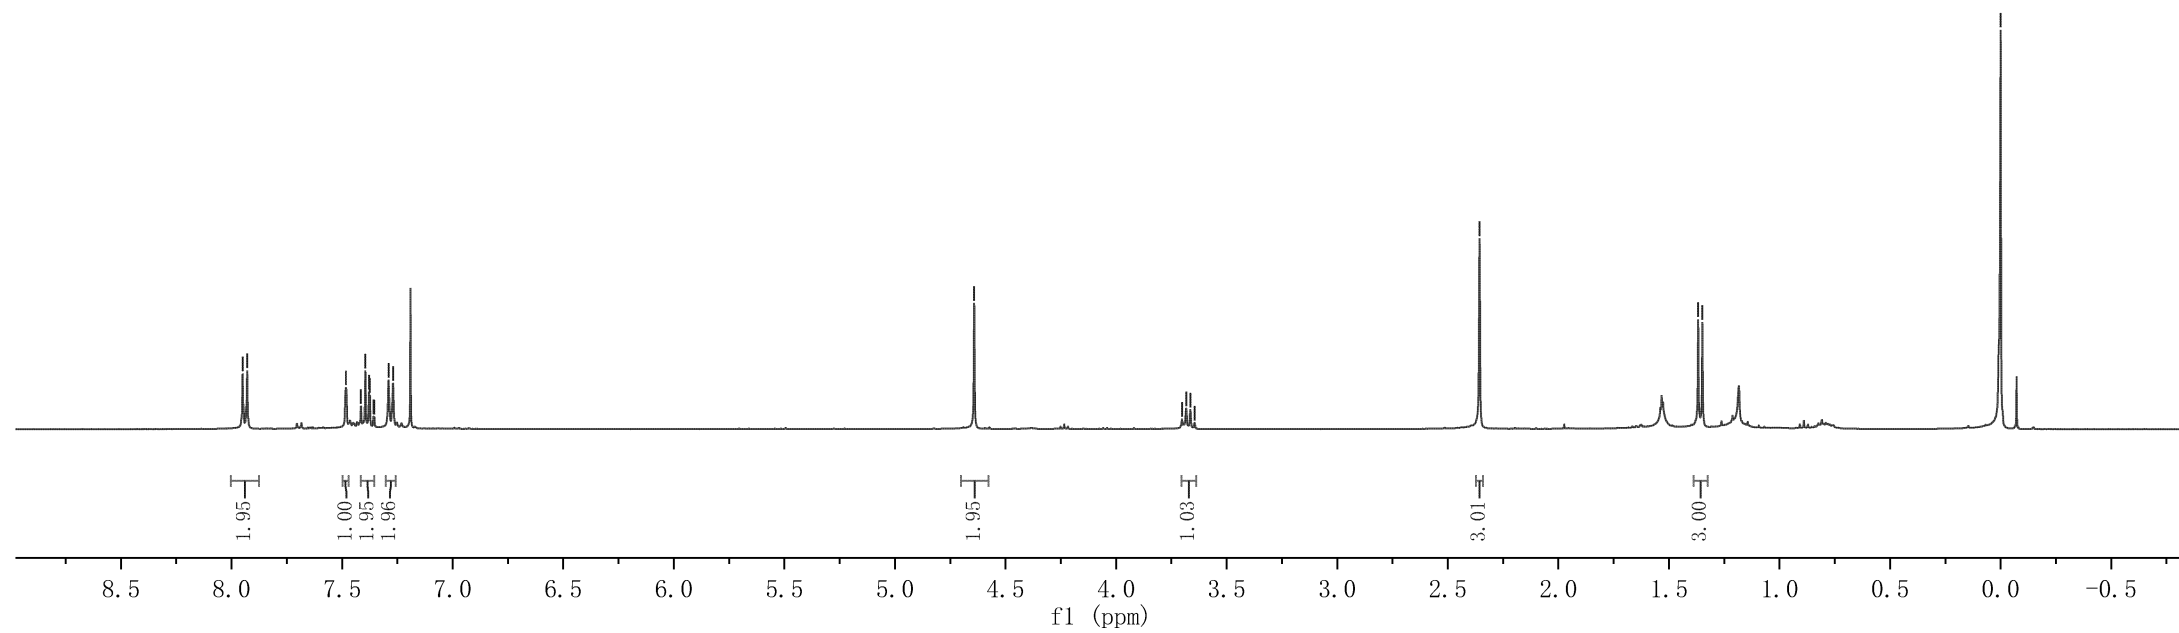

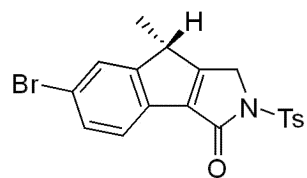

**5g**

$^{13}\text{C}$  NMR (100 MHz,  $\text{CDCl}_3$ ) spectra of **5g**

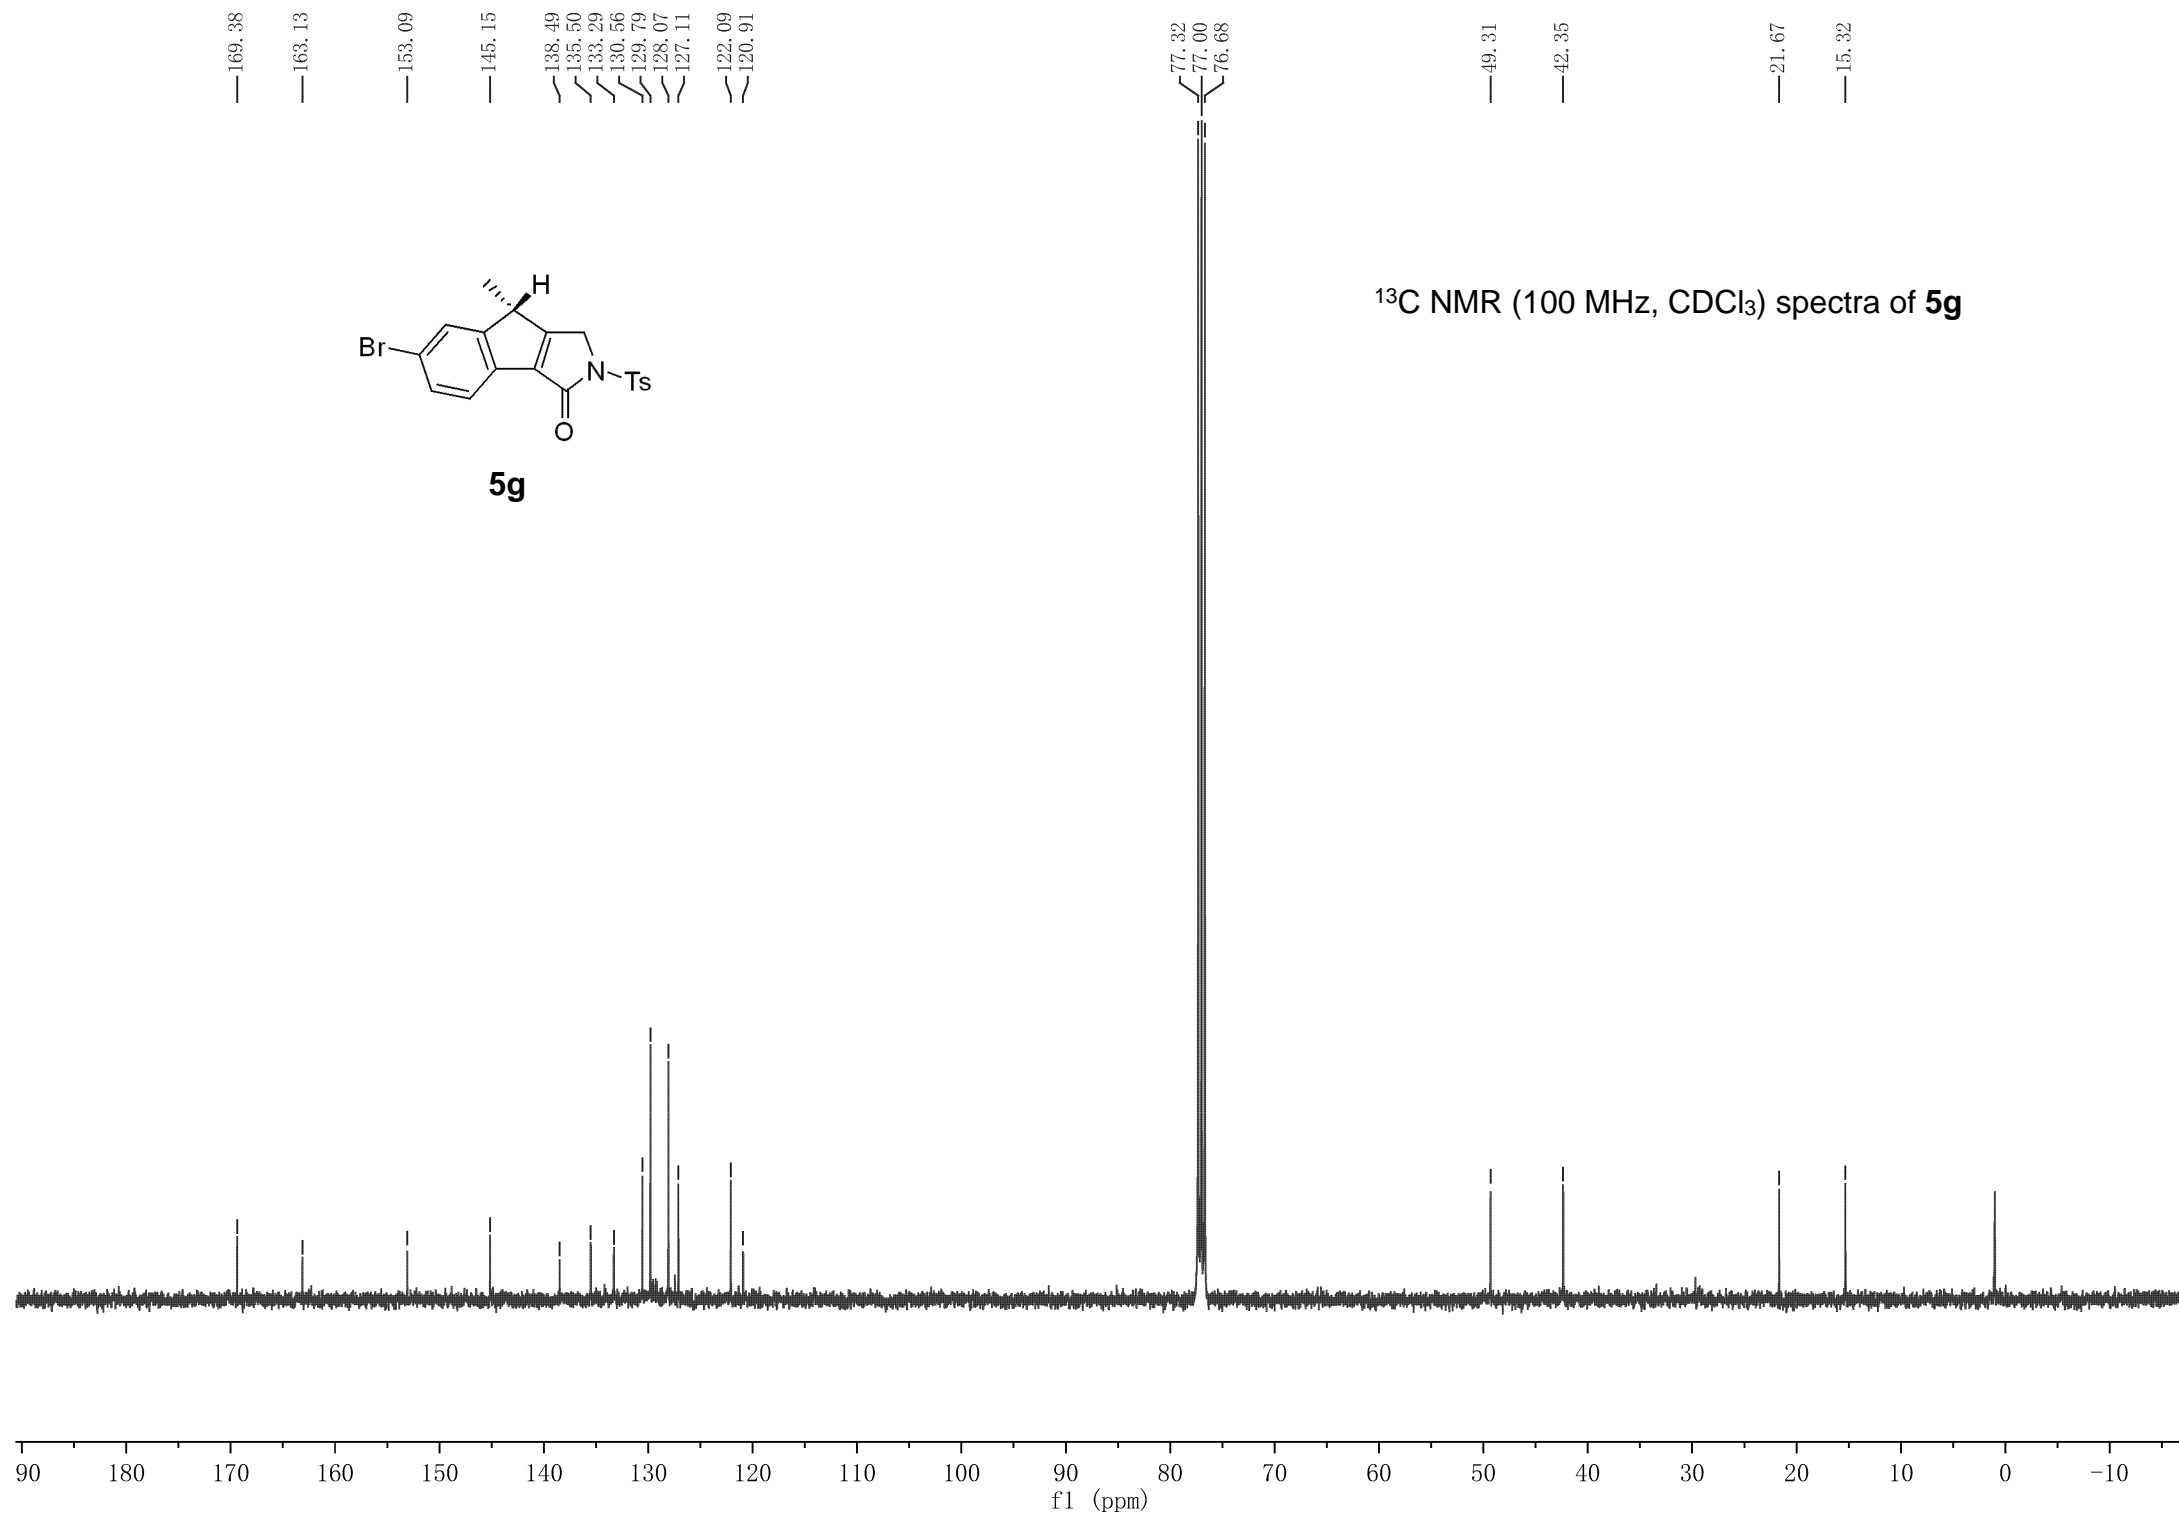

7.957  
7.936  
7.645  
7.626  
7.583  
7.524  
7.504  
7.275

4.699

3.785  
3.766  
3.747  
3.728

2.358

1.415  
1.395

0.000

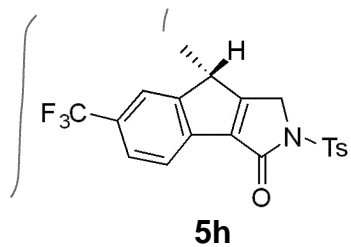

<sup>1</sup>H NMR (400 MHz, CDCl<sub>3</sub>) spectra of 5h

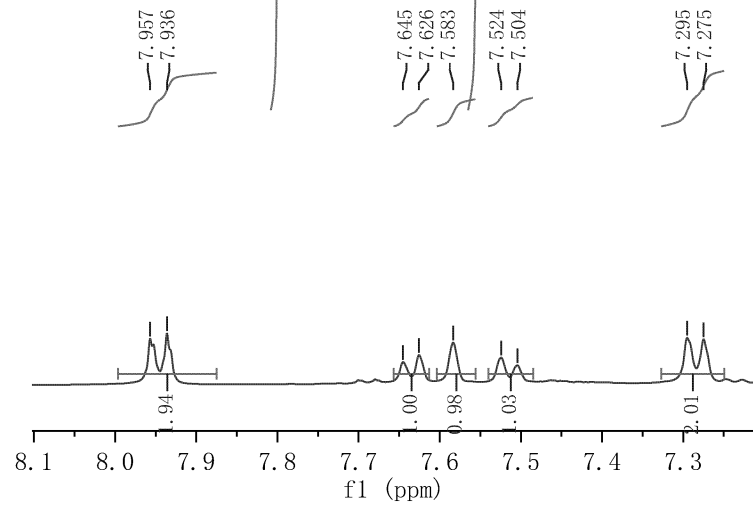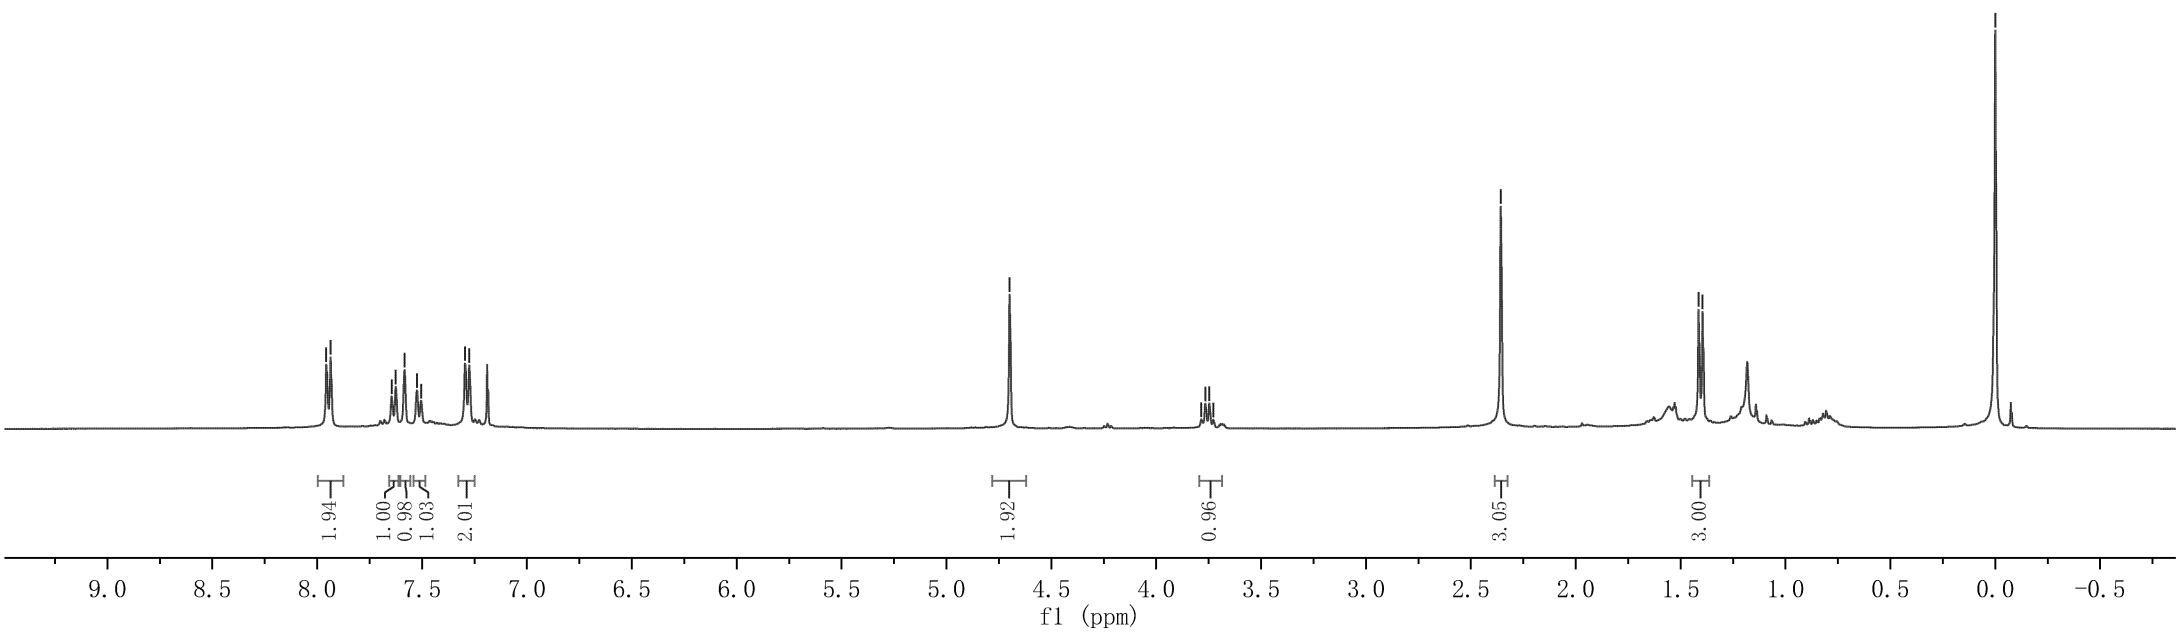

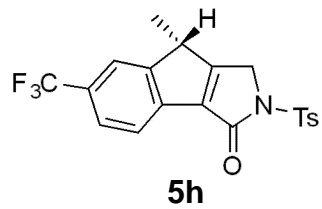

<sup>13</sup>C NMR (100 MHz, CDCl<sub>3</sub>) spectra of **5h**

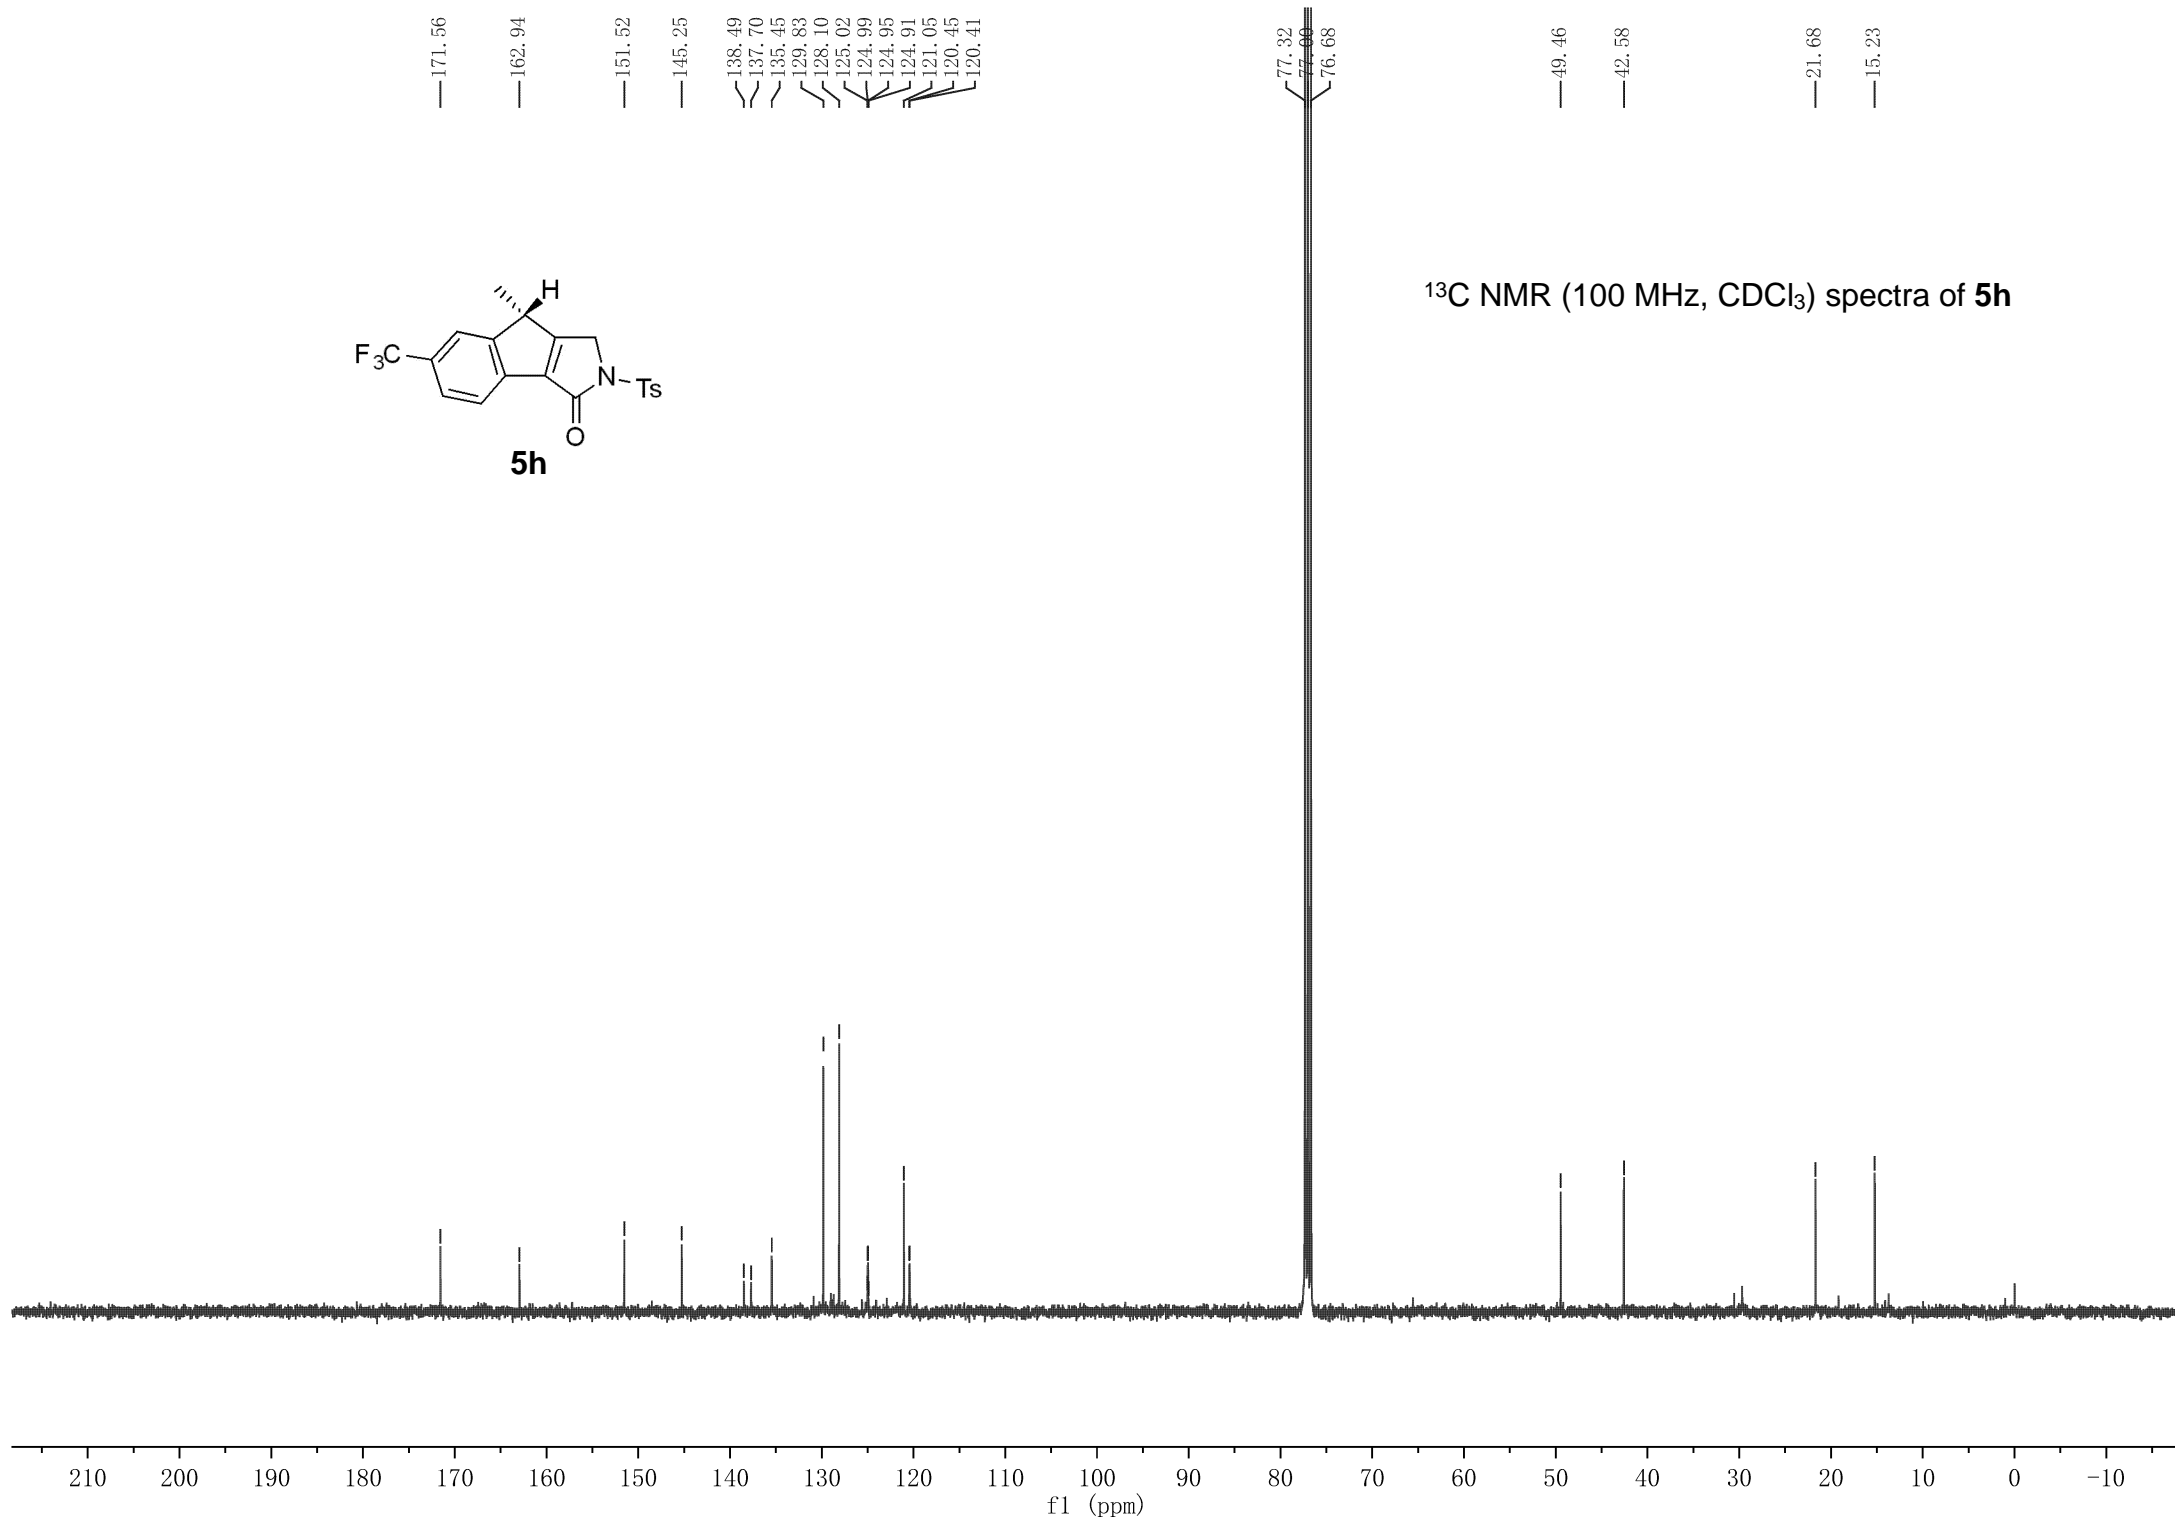



7.945  
7.927

7.447  
7.294  
7.275  
7.164

4.666

3.849  
3.831  
3.812  
3.794

2.361

1.461  
1.442

0.000

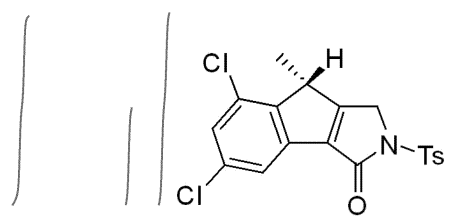

**5i**

<sup>1</sup>H NMR (400 MHz, CDCl<sub>3</sub>) spectra of **5i**

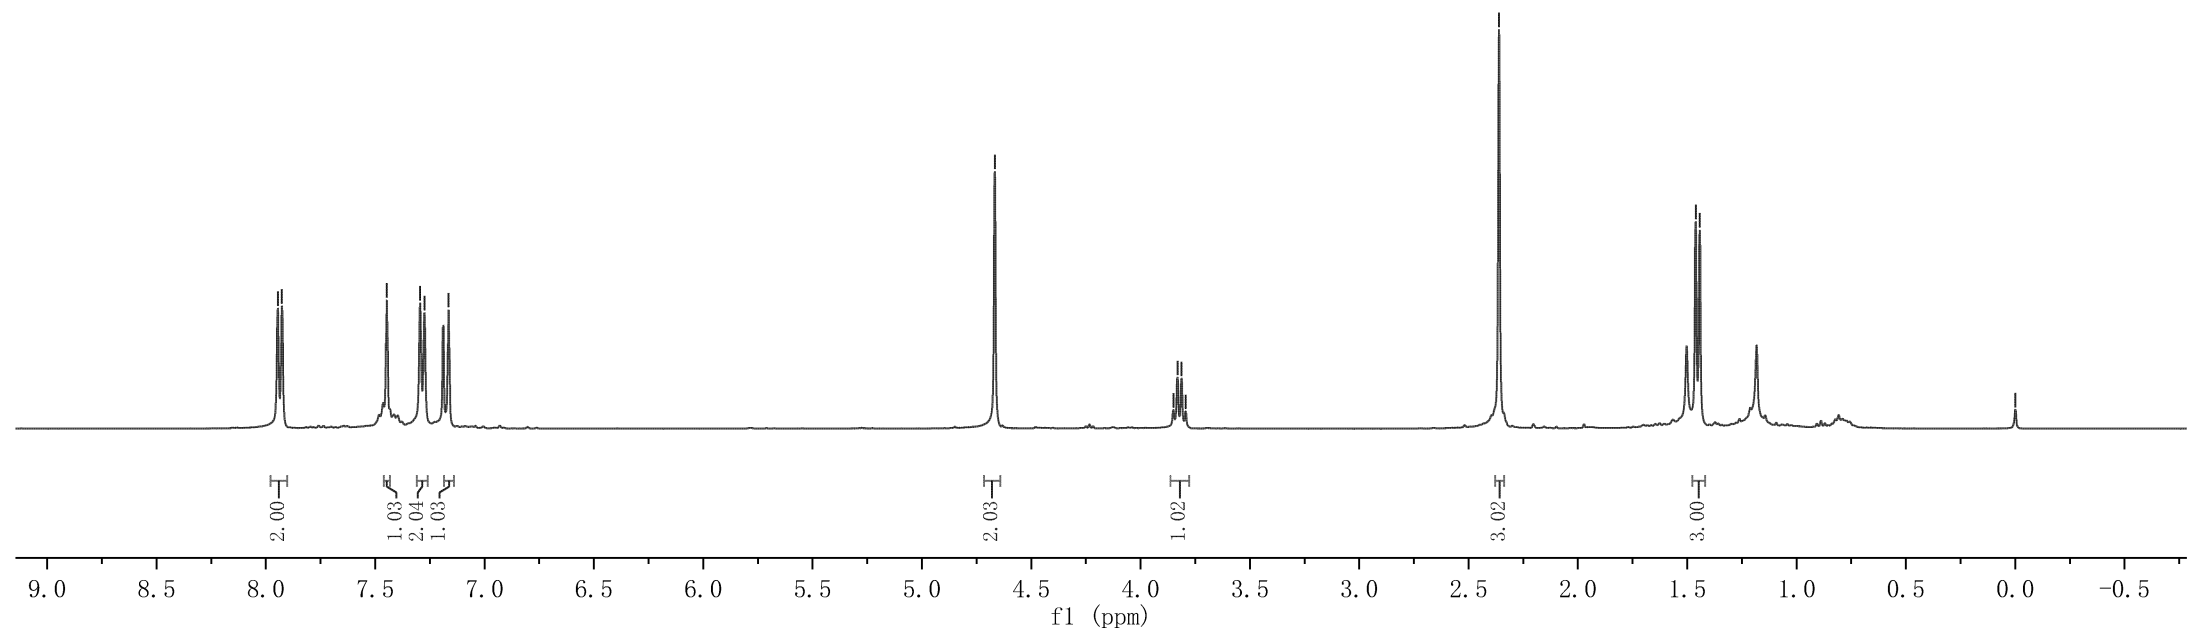

— 171.26

— 162.57

145.80

145.28

137.50

137.29

135.32

134.49

130.72

129.81

128.05

127.03

— 119.97

77.32

77.00

76.68

— 49.28

— 42.68

— 21.67

— 13.65

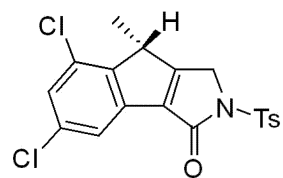

**5i**

<sup>13</sup>C NMR (100 MHz, CDCl<sub>3</sub>) spectra of **5i**

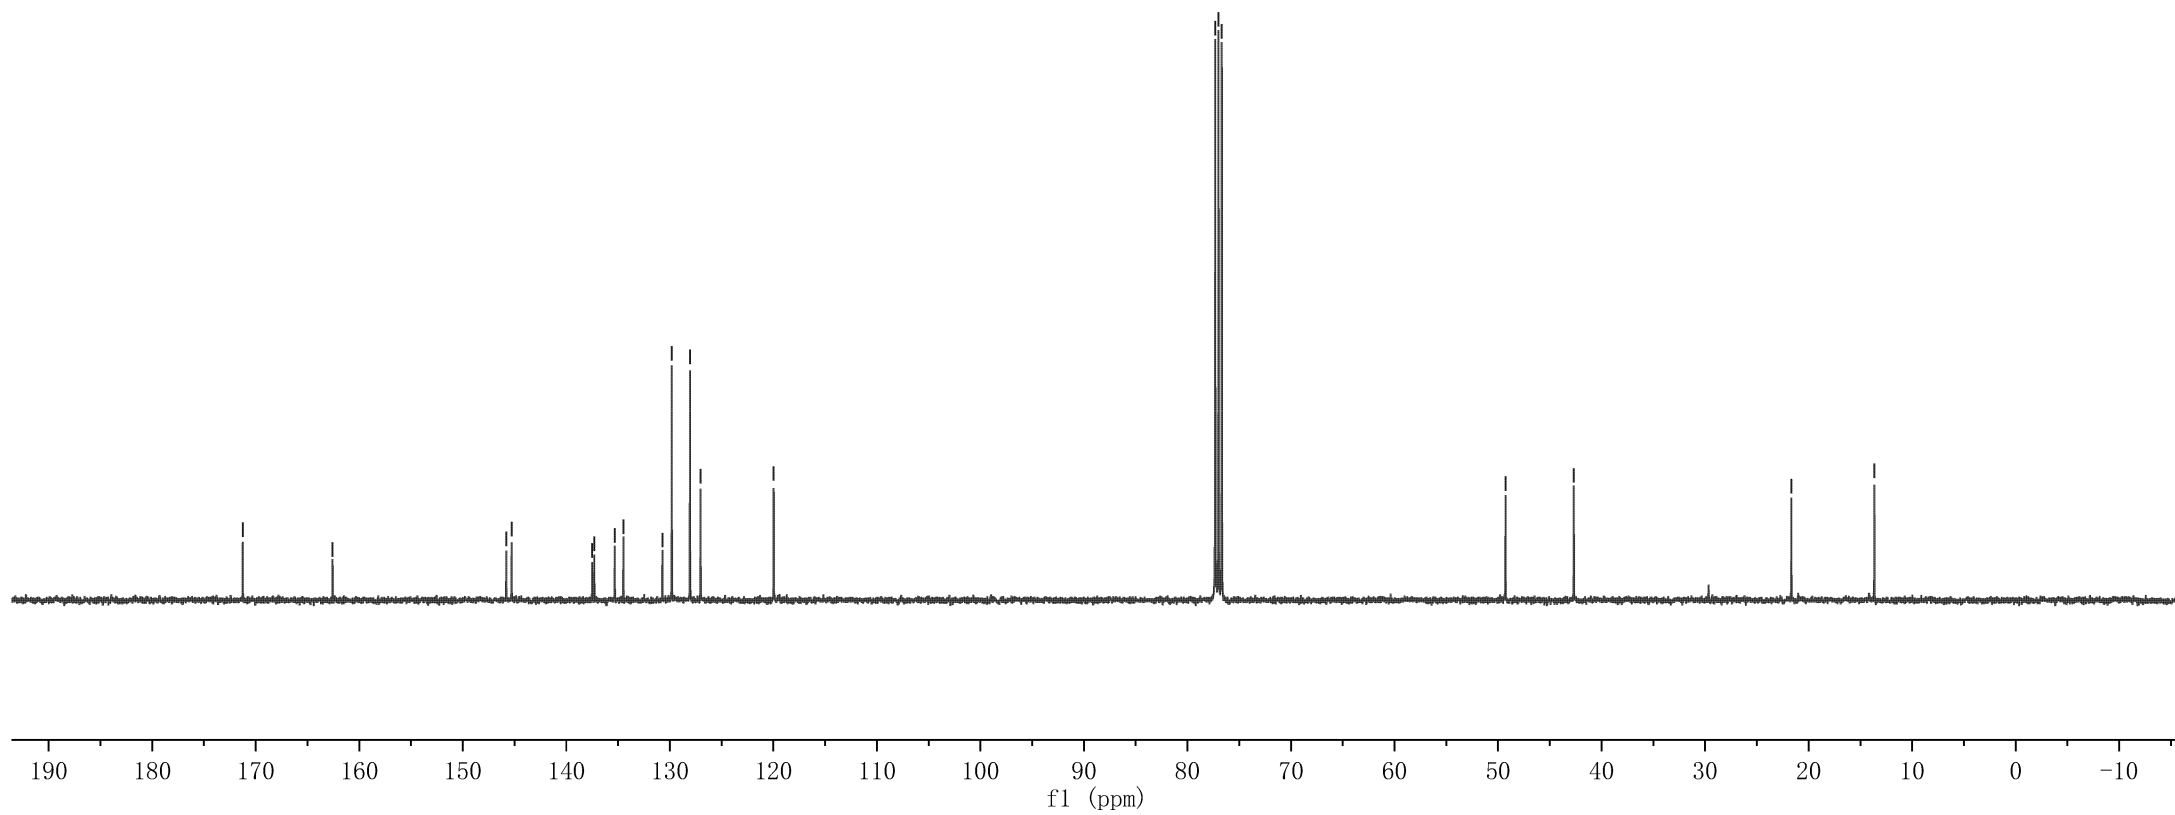

8.021  
8.002

7.497  
7.478  
7.349  
7.330  
7.228  
7.112  
7.093

4.704

3.726  
3.708  
3.689  
3.670

2.420  
2.385

1.421  
1.402

0.000

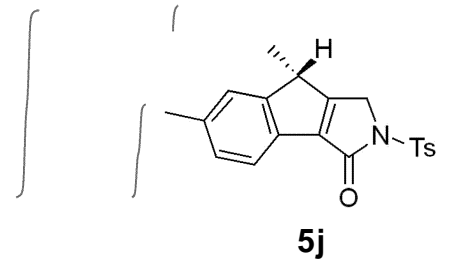

<sup>1</sup>H NMR (400 MHz, CDCl<sub>3</sub>) spectra of **5j**

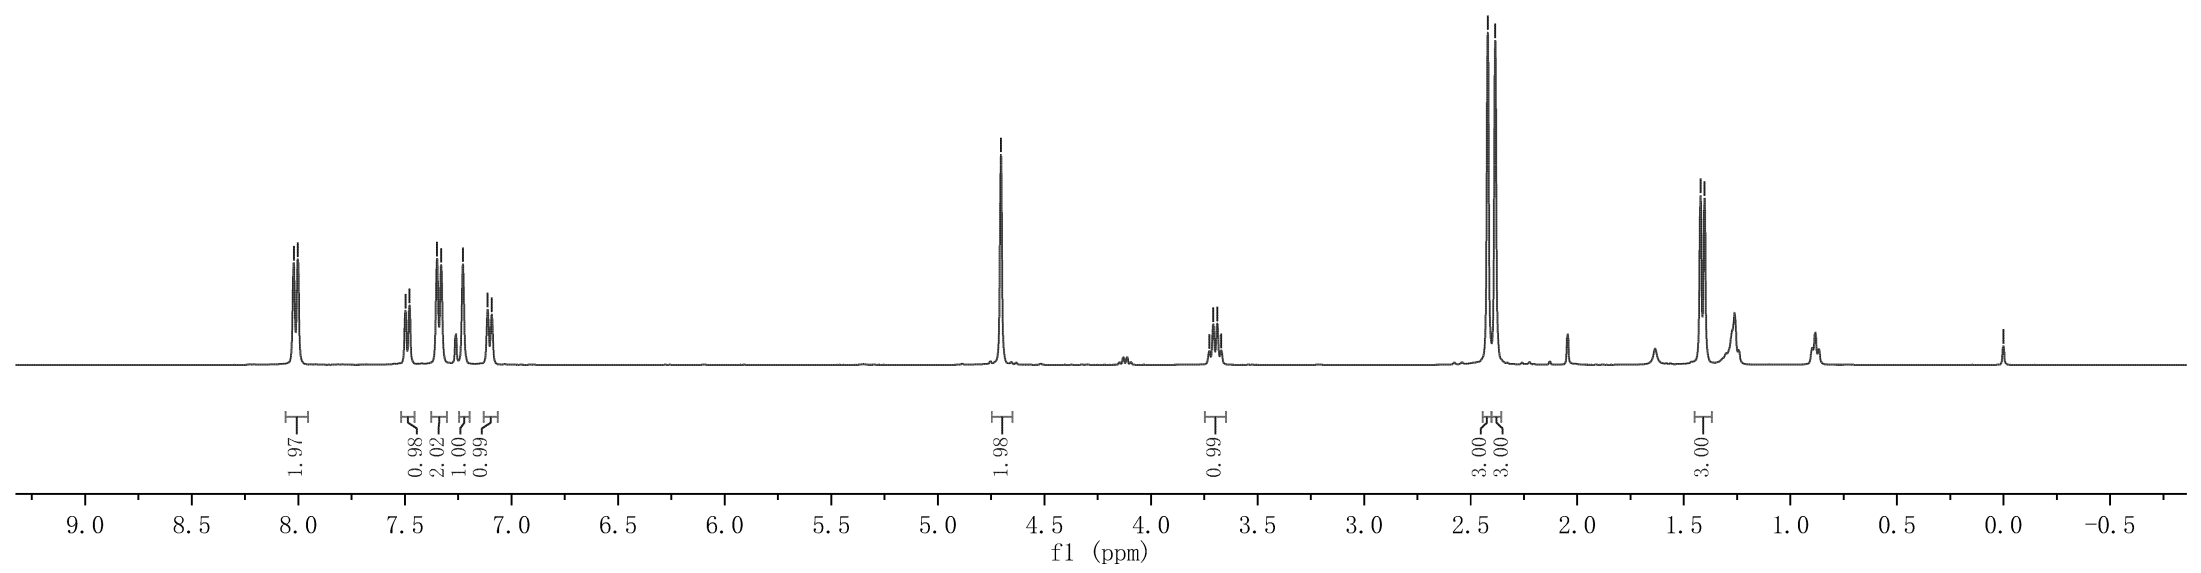

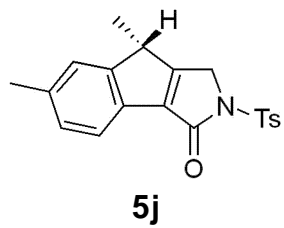

<sup>13</sup>C NMR (100 MHz, CDCl<sub>3</sub>) spectra of **5j**

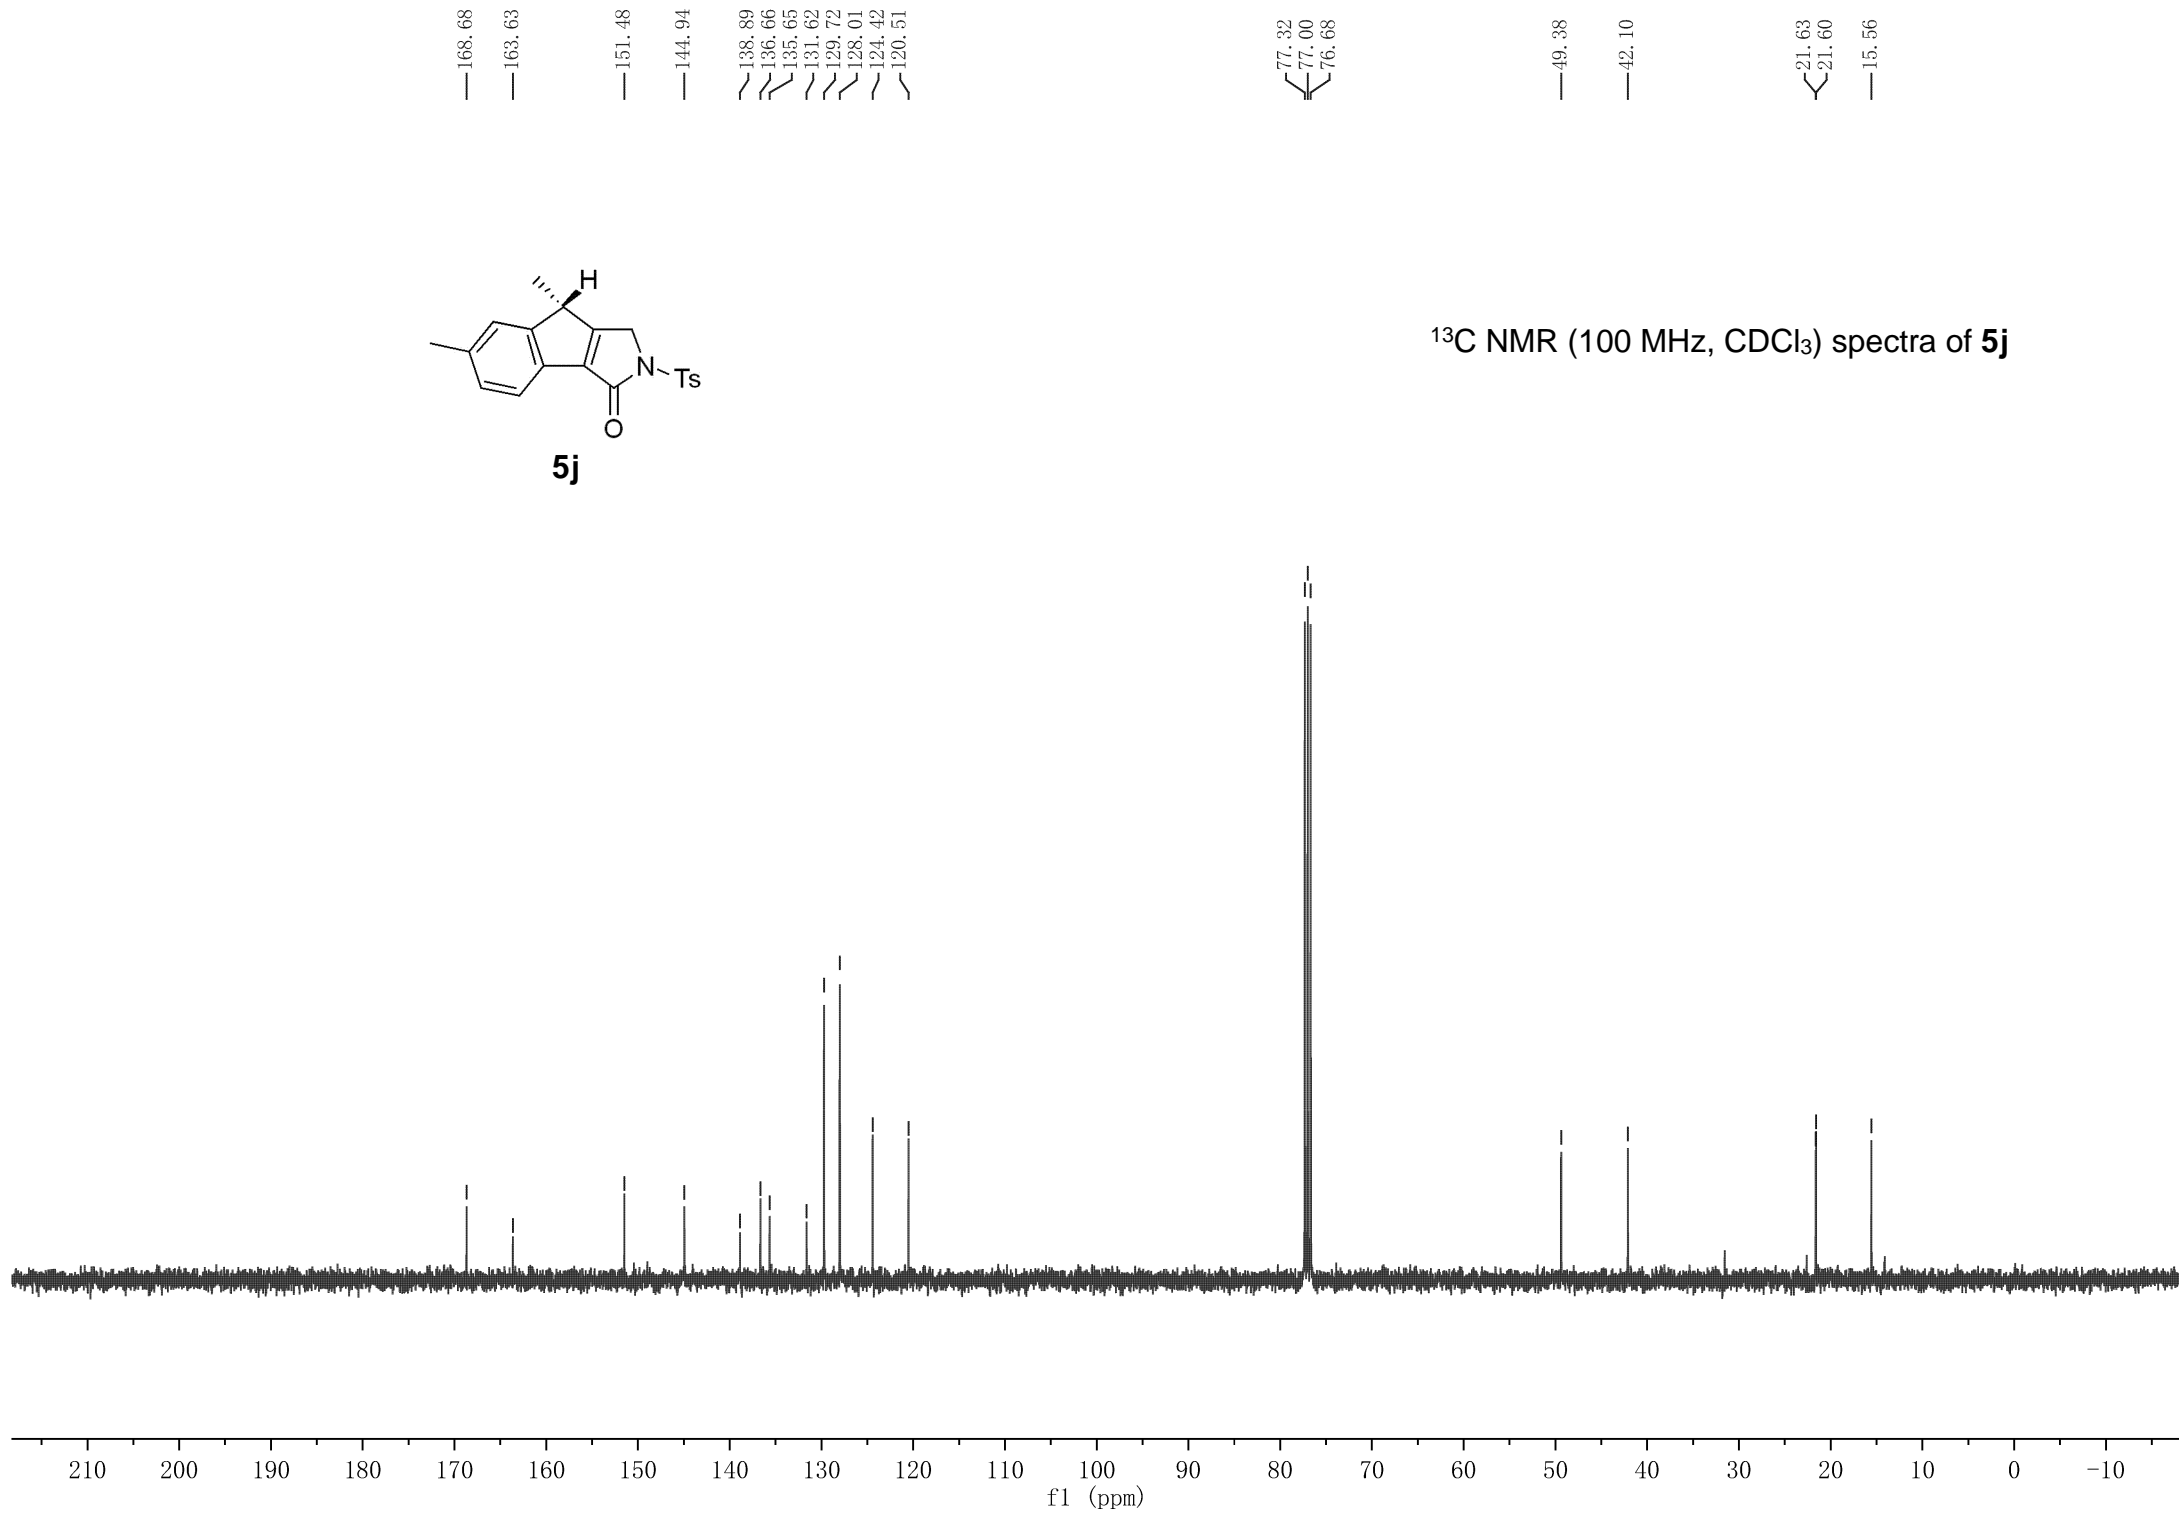

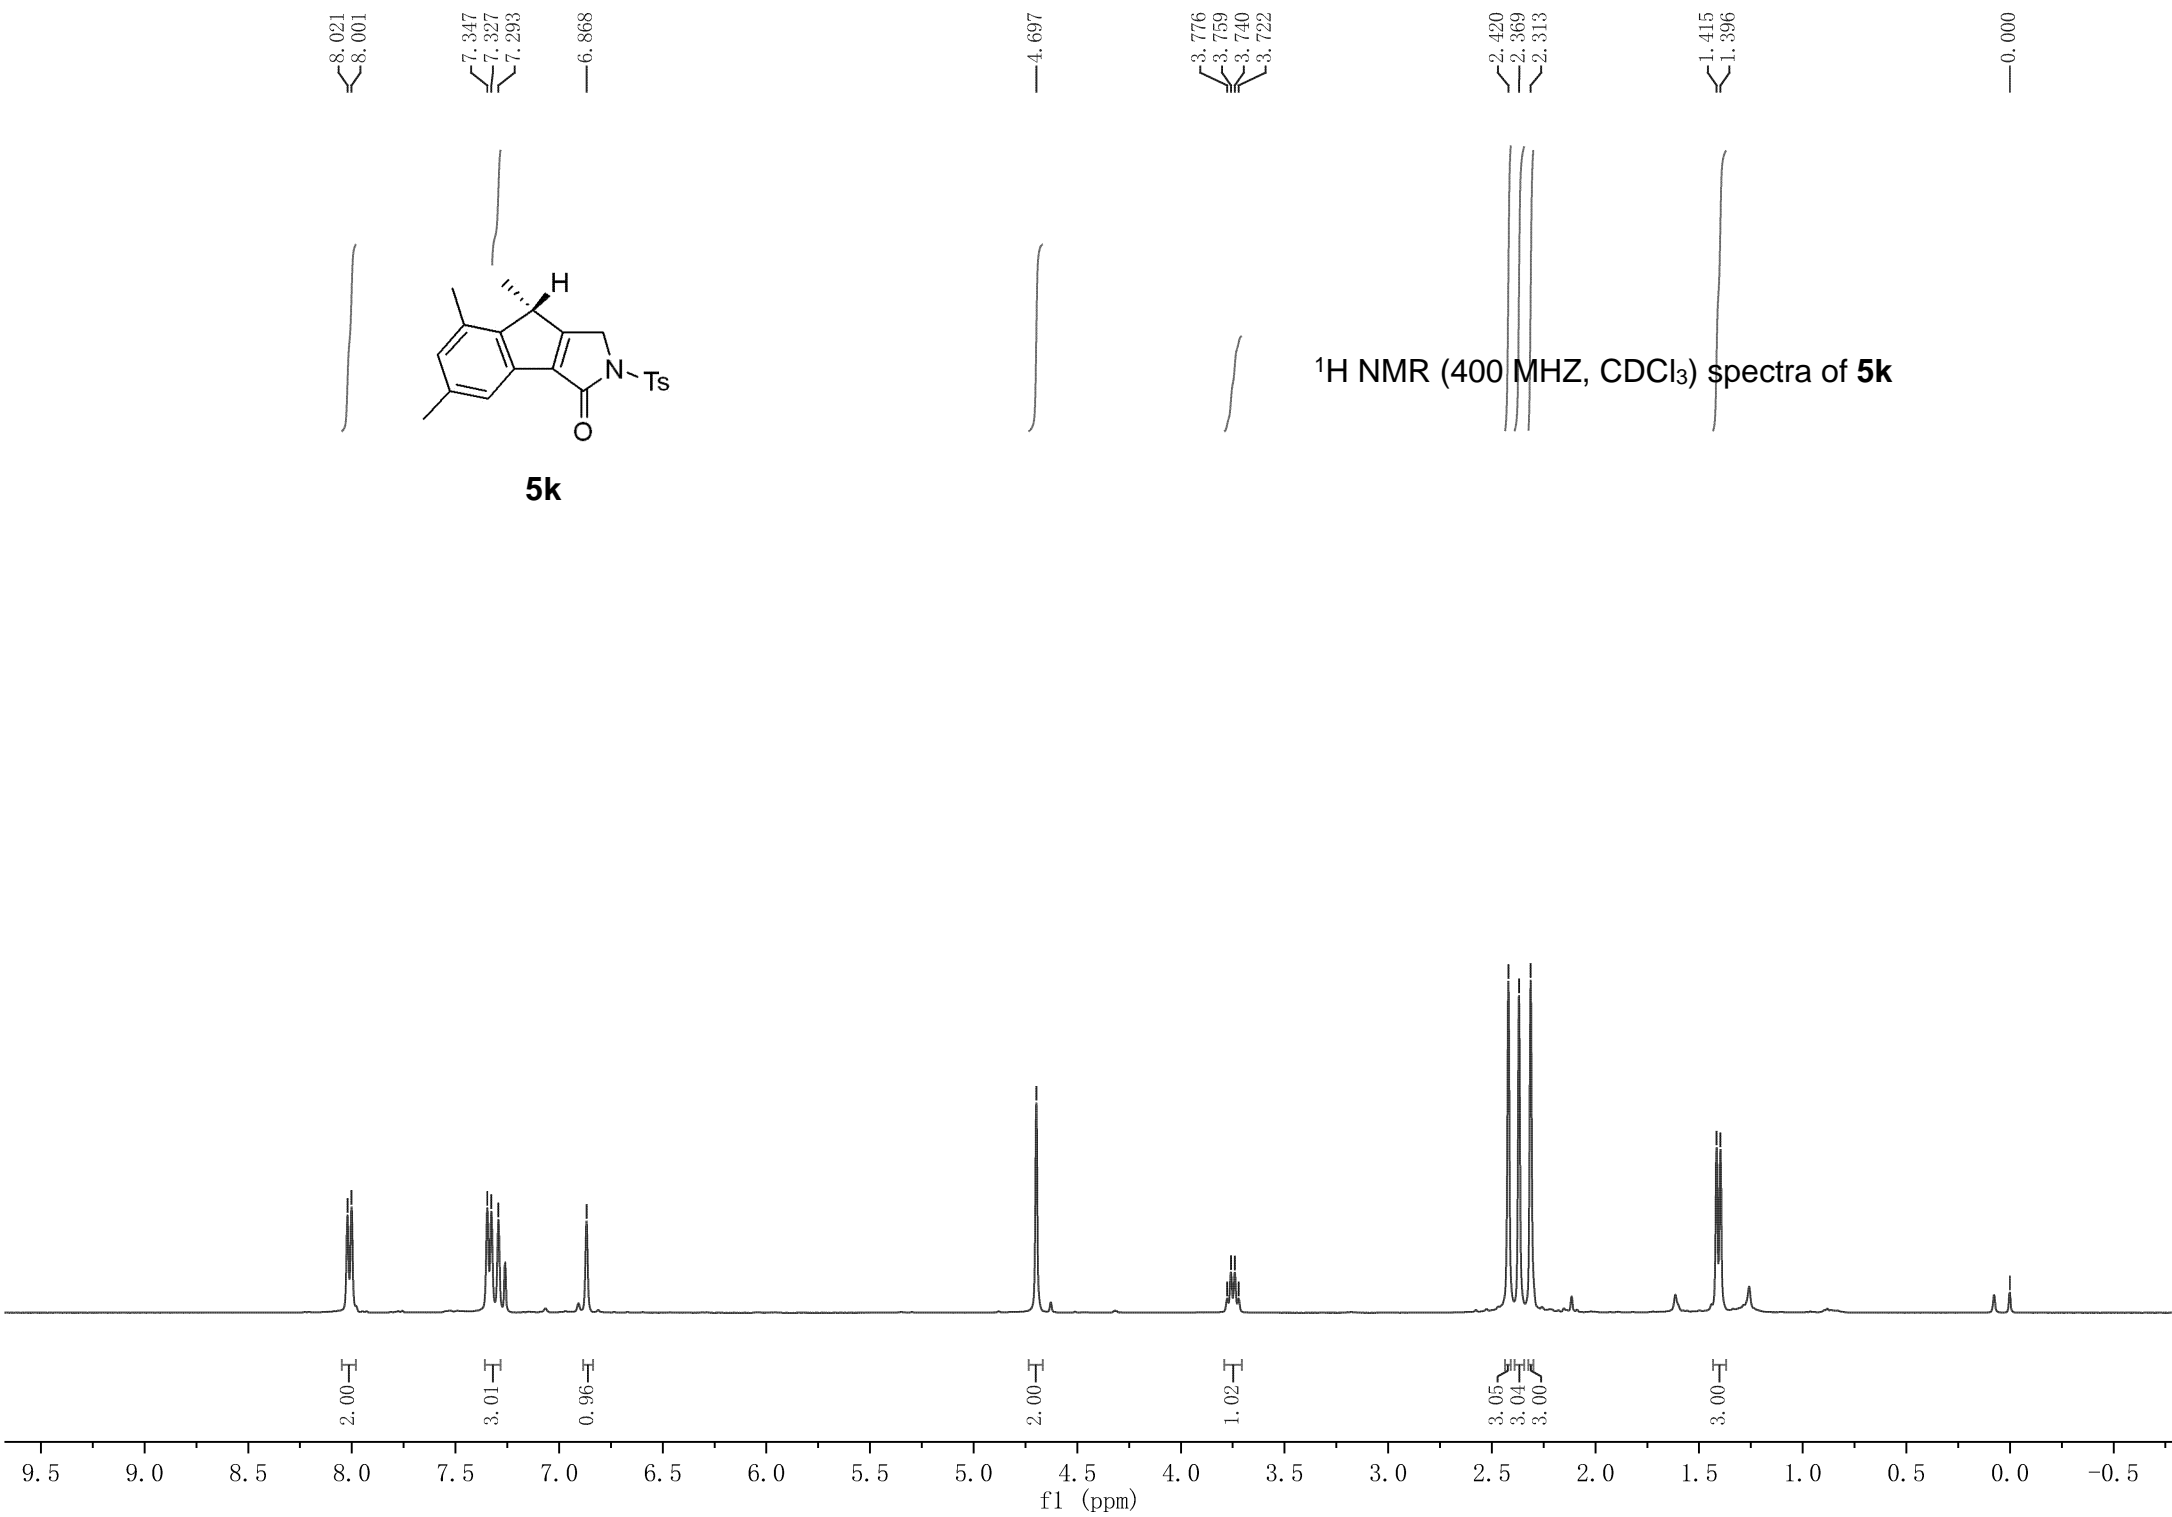

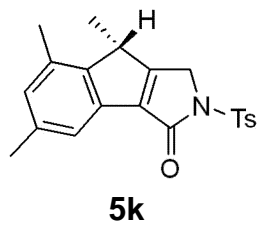

$^{13}\text{C}$  NMR (100 MHz,  $\text{CDCl}_3$ ) spectra of **5k**

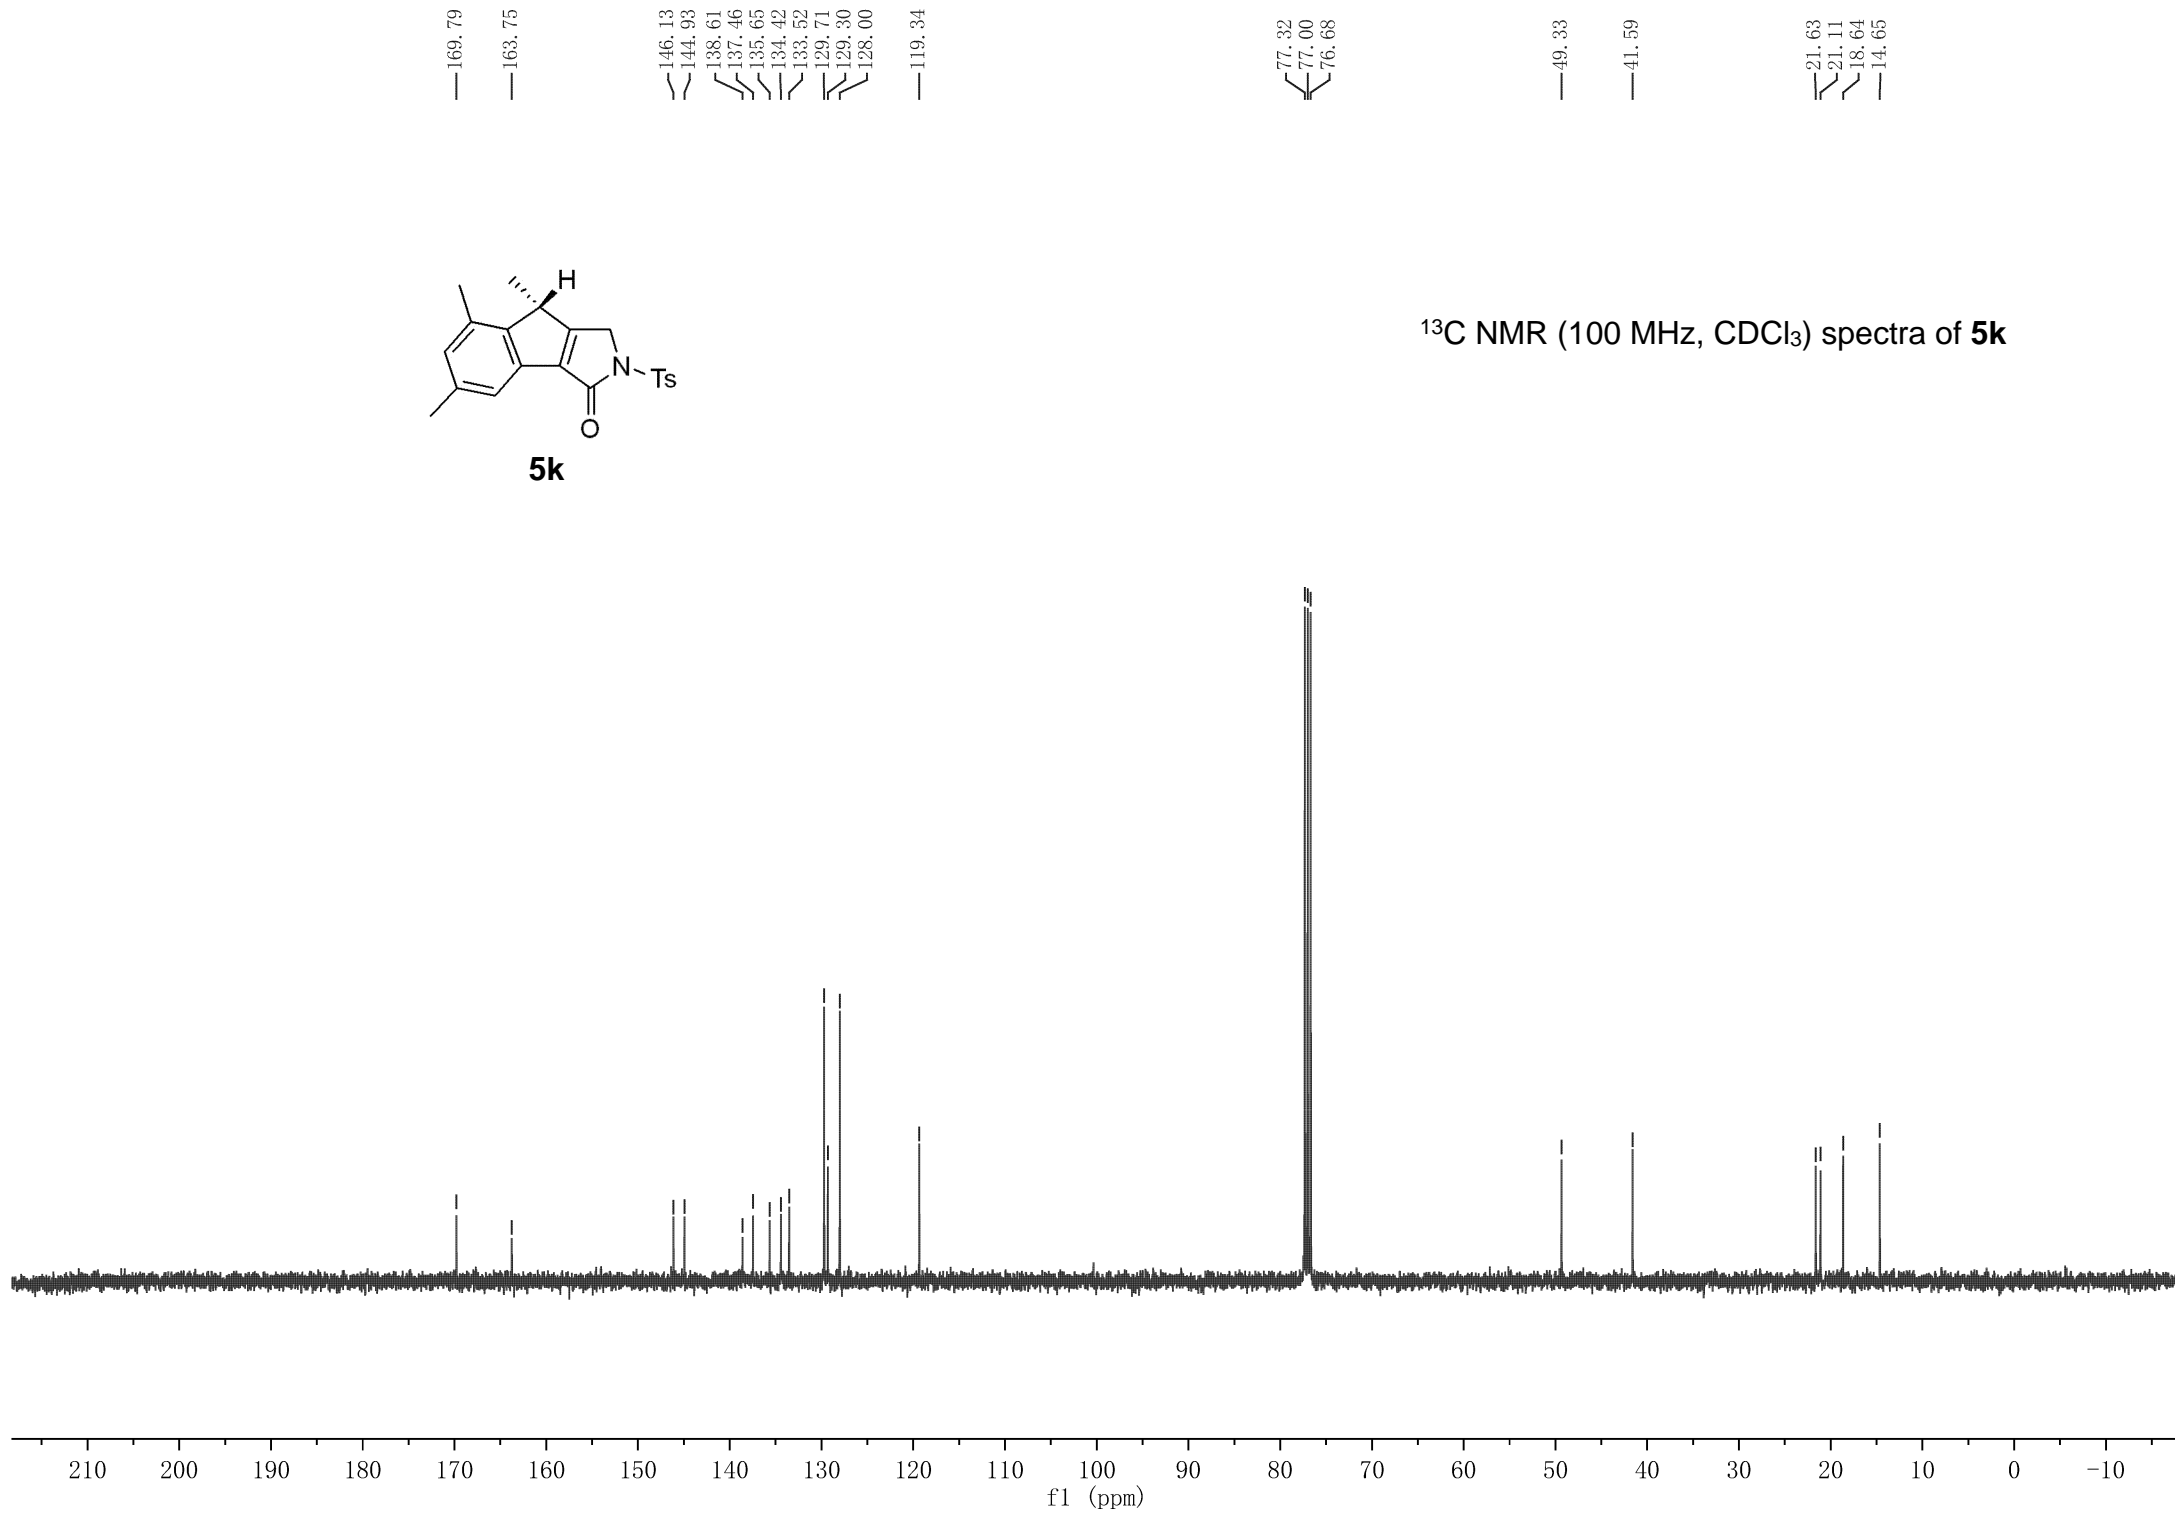

8.024  
8.005  
7.622  
7.605  
7.418  
7.402  
7.352  
7.333  
7.288  
7.275  
7.261  
7.217

4.764  
4.750

3.725  
3.685  
3.671

2.420  
2.087  
2.053  
2.036  
2.004  
1.832  
1.814  
1.796  
1.779  
1.743

0.923  
0.905  
0.887

0.000

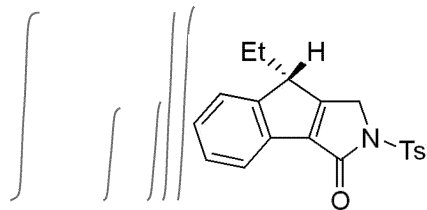

**5I**

<sup>1</sup>H NMR (400 MHz, CDCl<sub>3</sub>) spectra of **5I**

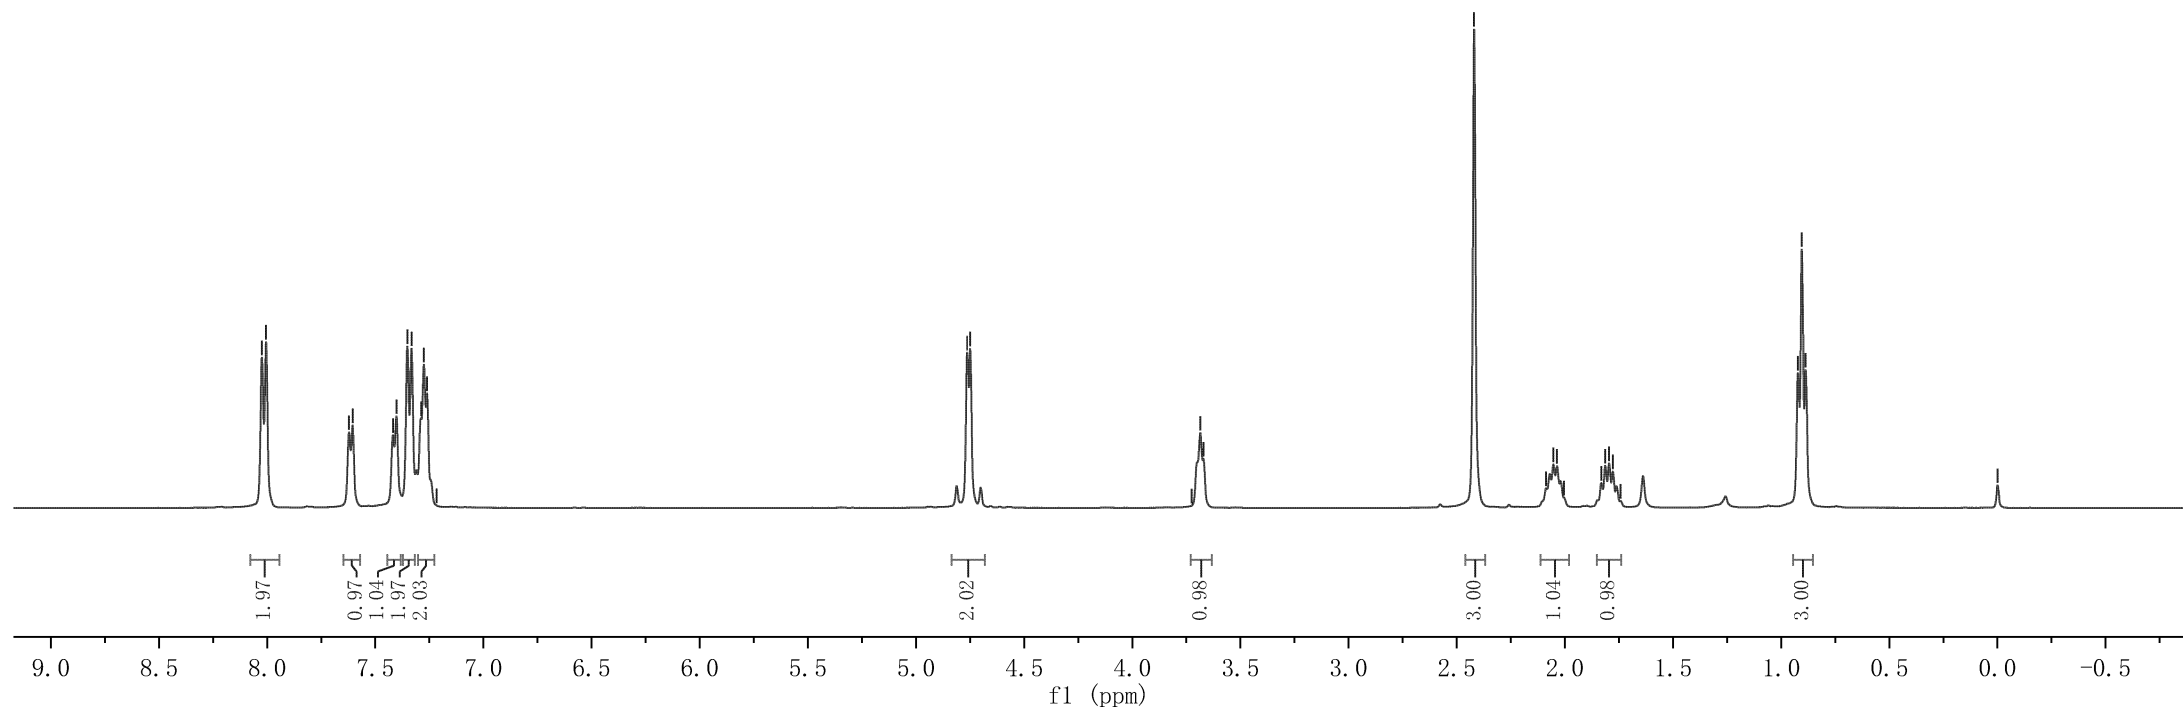

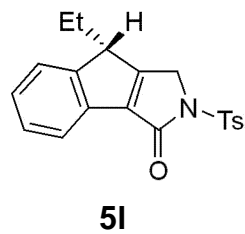

<sup>13</sup>C NMR (100 MHz, CDCl<sub>3</sub>) spectra of **5I**

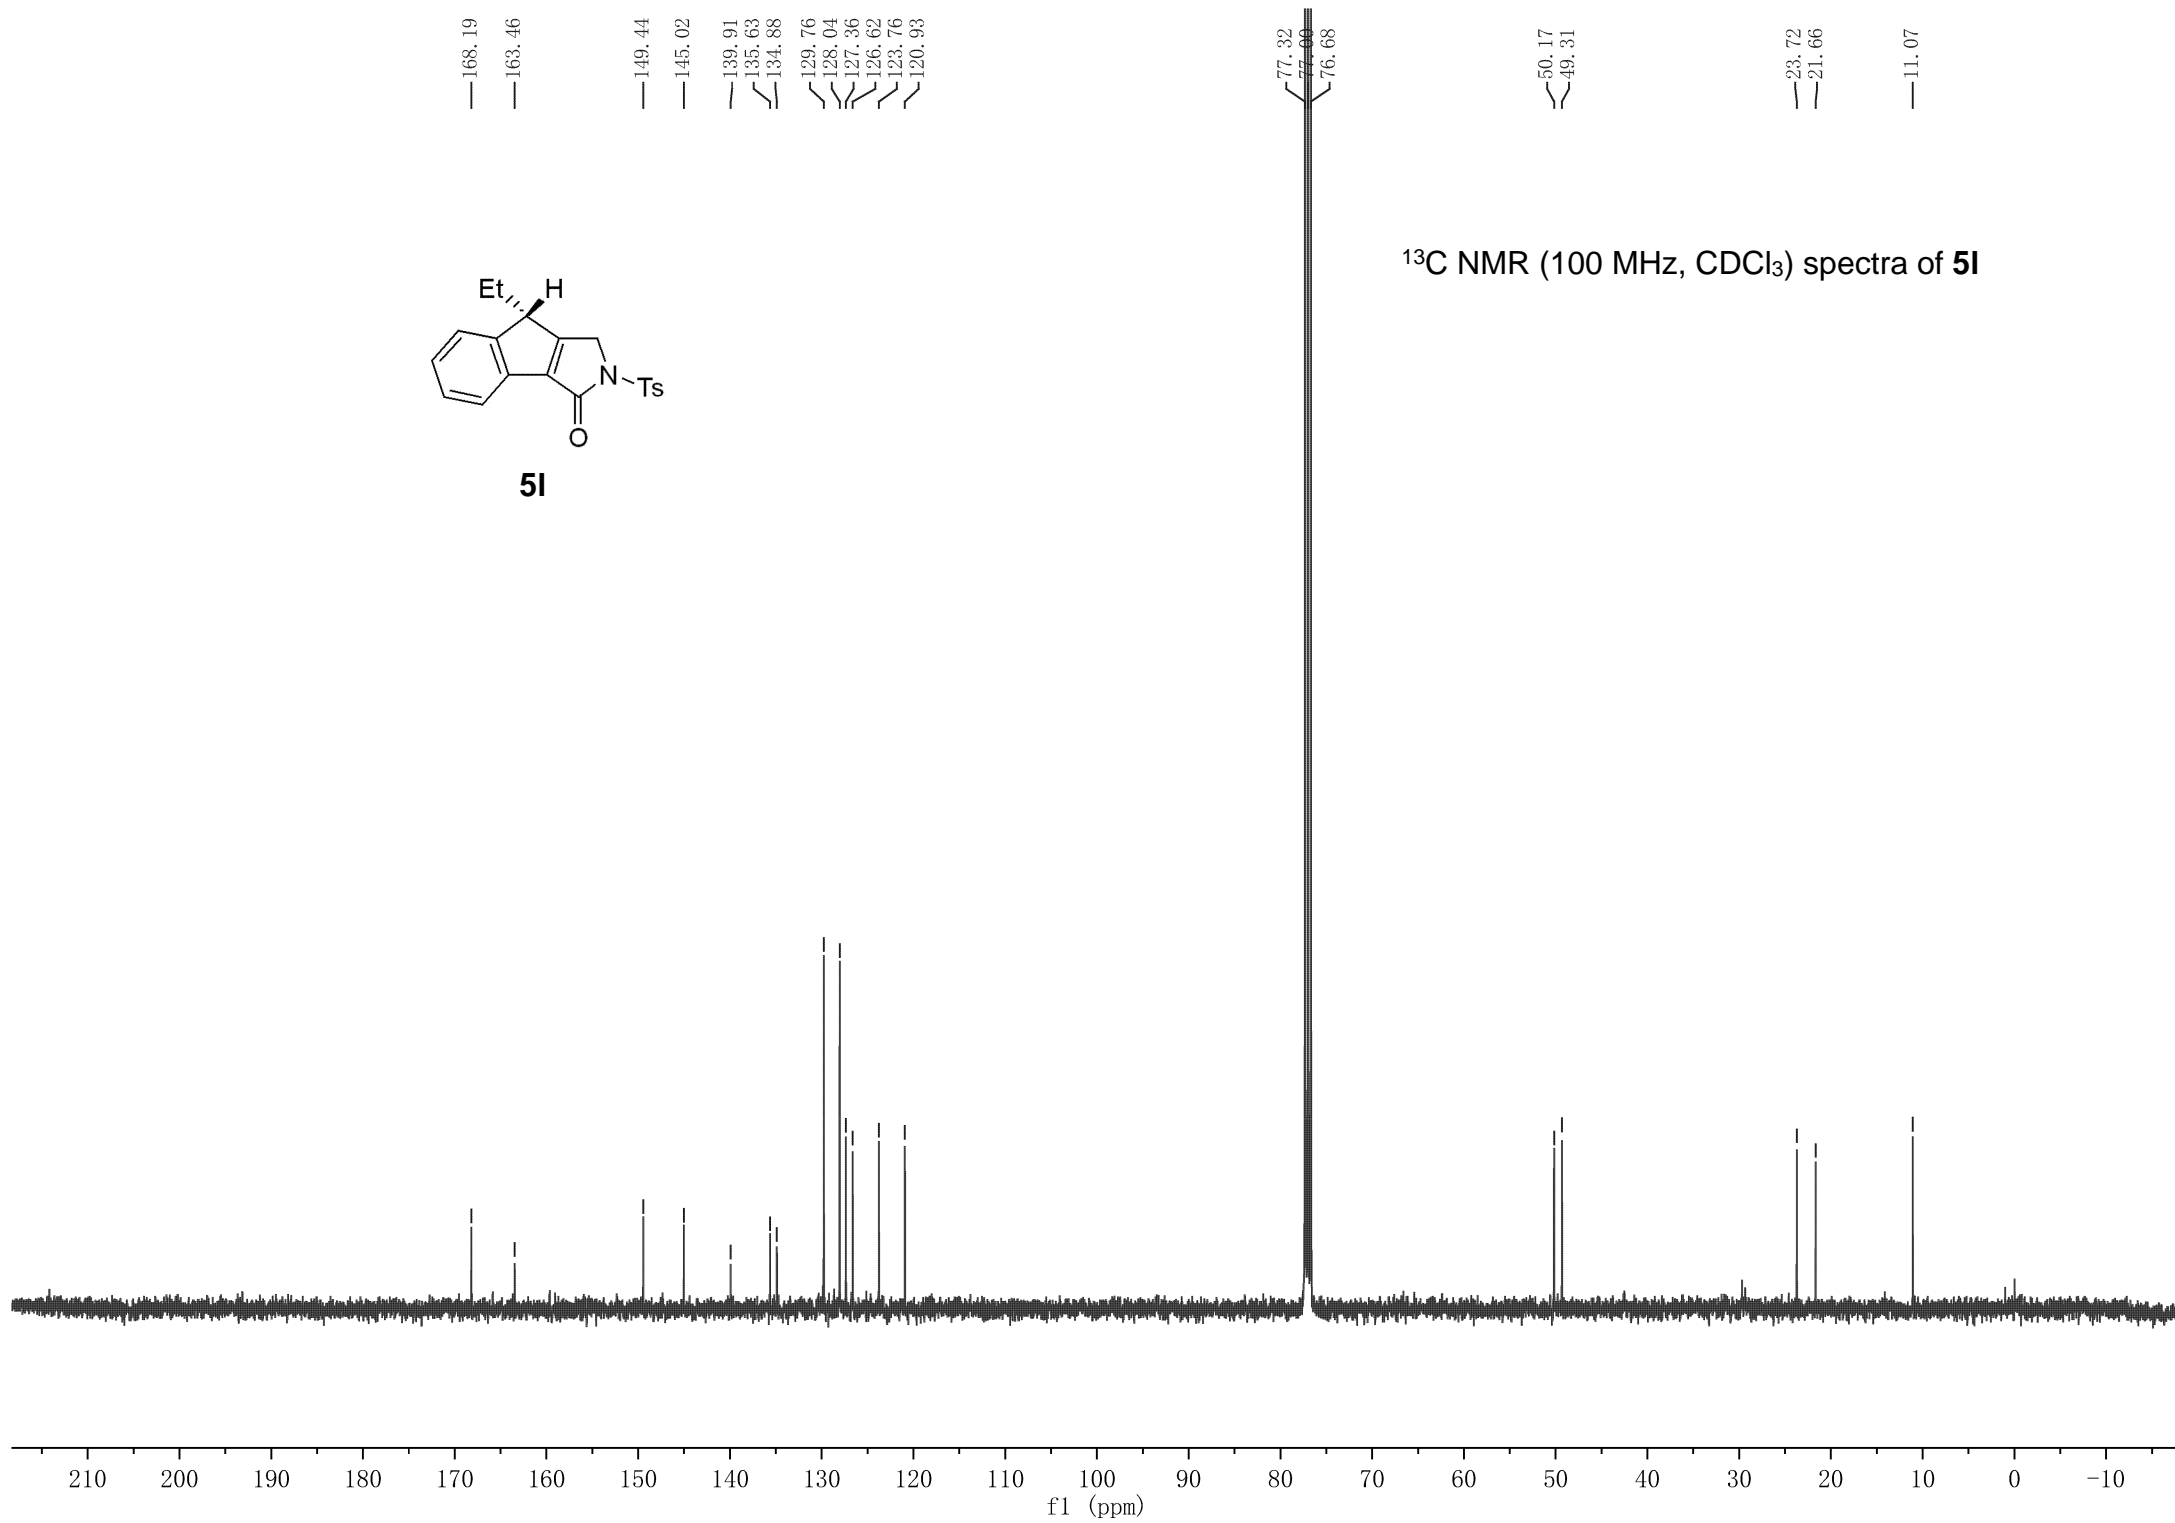



8.086  
8.066  
7.632  
7.614  
7.426  
7.409  
7.318  
7.300  
7.283  
7.266  
7.017  
6.998

4.814  
4.766  
4.752  
4.703

3.863  
3.708  
3.692  
3.676

2.096  
2.061  
2.044  
2.026  
1.838  
1.821  
1.803  
1.767

0.933  
0.914  
0.896

0.000

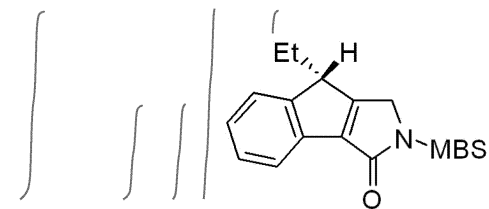

**5m**

<sup>1</sup>H NMR (400 MHz, CDCl<sub>3</sub>) spectra of **5m**

2.00  
1.00  
1.02  
2.03  
2.01

2.02

3.00  
1.00

1.02  
1.00

3.04

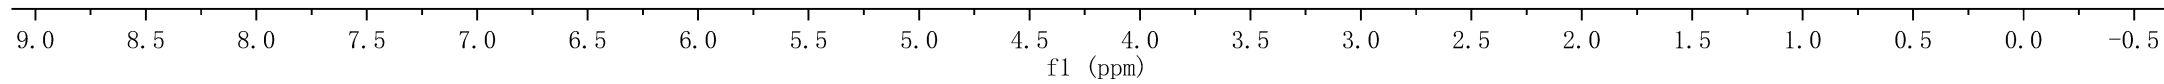

— 168.12  
— 163.91  
— 163.53  
  
— 149.46  
  
— 139.94  
— 134.91  
— 130.33  
— 130.04  
— 127.34  
— 126.59  
— 123.76  
— 120.90  
  
— 114.29

— 77.32  
— 77.00  
— 76.68

— 55.66  
— 50.14  
— 49.30

— 23.71

— 11.07

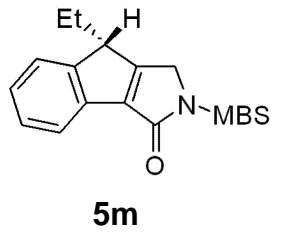

<sup>13</sup>C NMR (100 MHz, CDCl<sub>3</sub>) spectra of **5m**

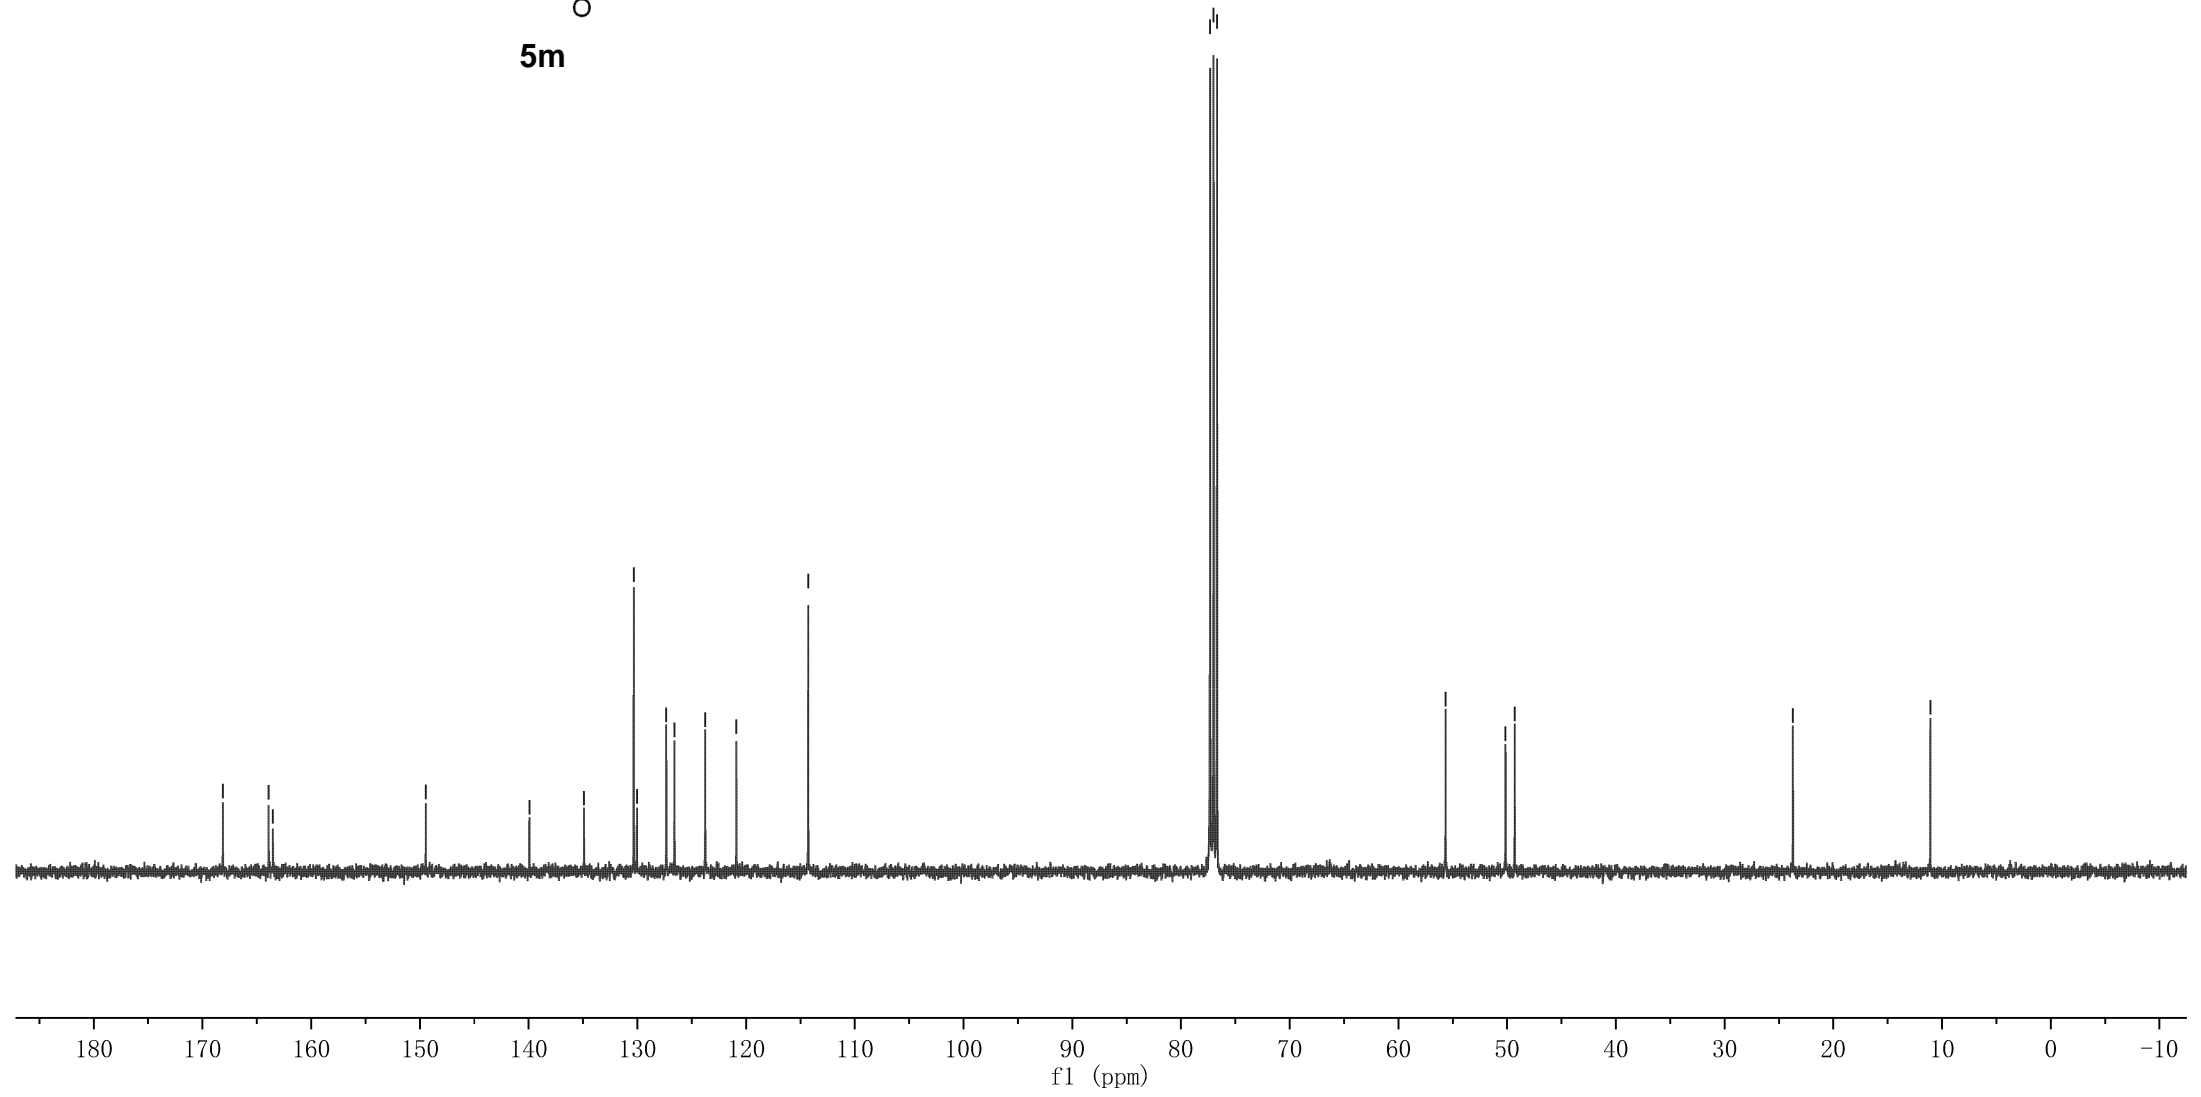

8.029  
8.010  
7.629  
7.612  
7.420  
7.403  
7.357  
7.337  
7.294  
7.278  
7.261

4.812  
4.764  
4.745  
4.696

3.729  
3.712  
3.696

2.425  
2.007  
1.974  
1.953  
1.940  
1.736  
1.716  
1.683

1.308  
0.942  
0.883  
0.831

0.000

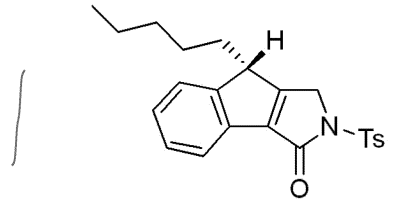

5n

<sup>1</sup>H NMR (400 MHz, CDCl<sub>3</sub>) spectra of 5n

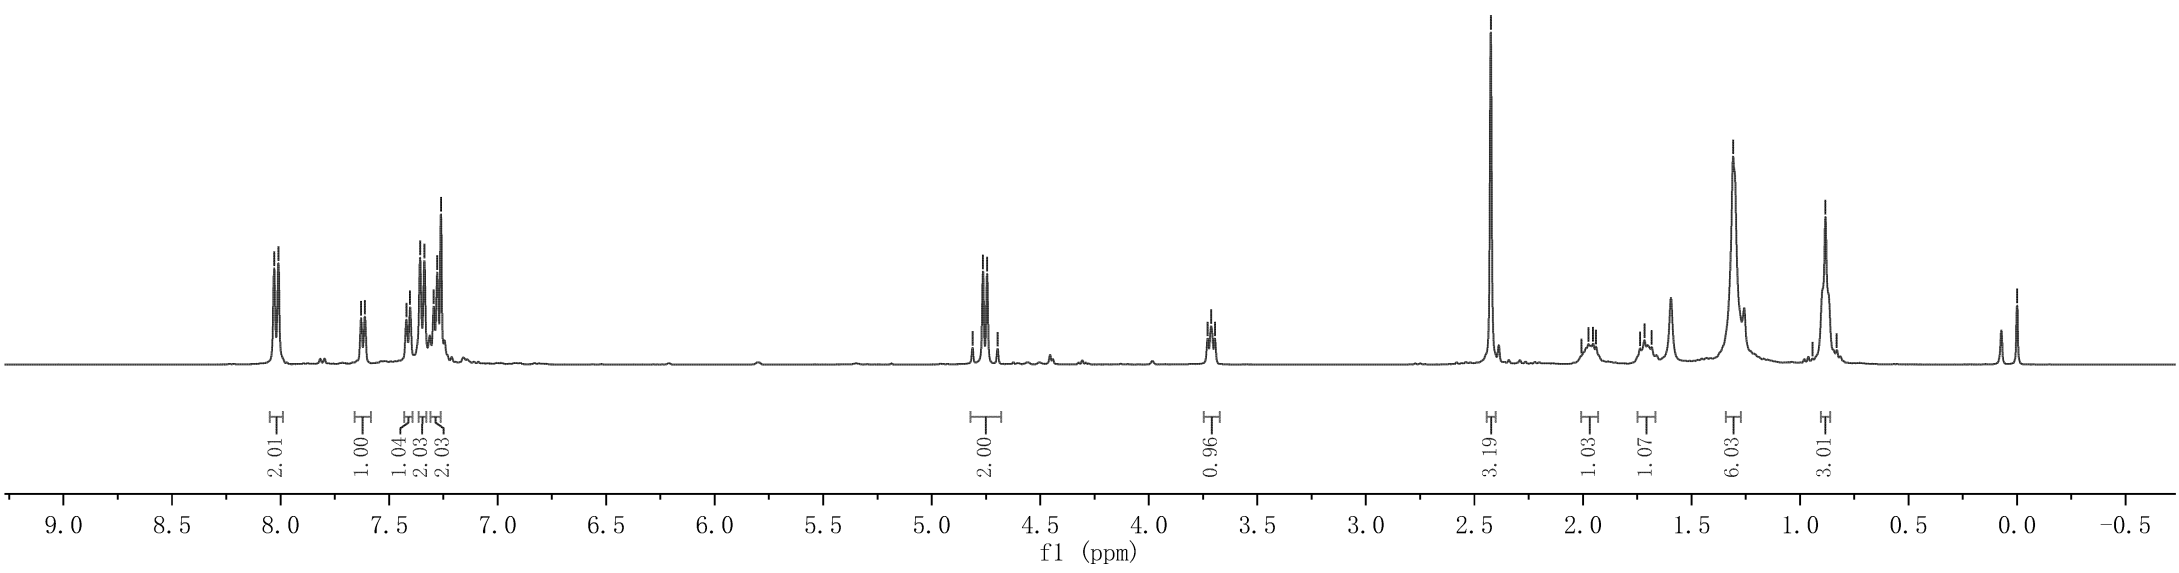

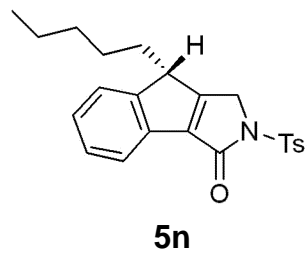

<sup>13</sup>C NMR (100 MHz, CDCl<sub>3</sub>) spectra of **5n**

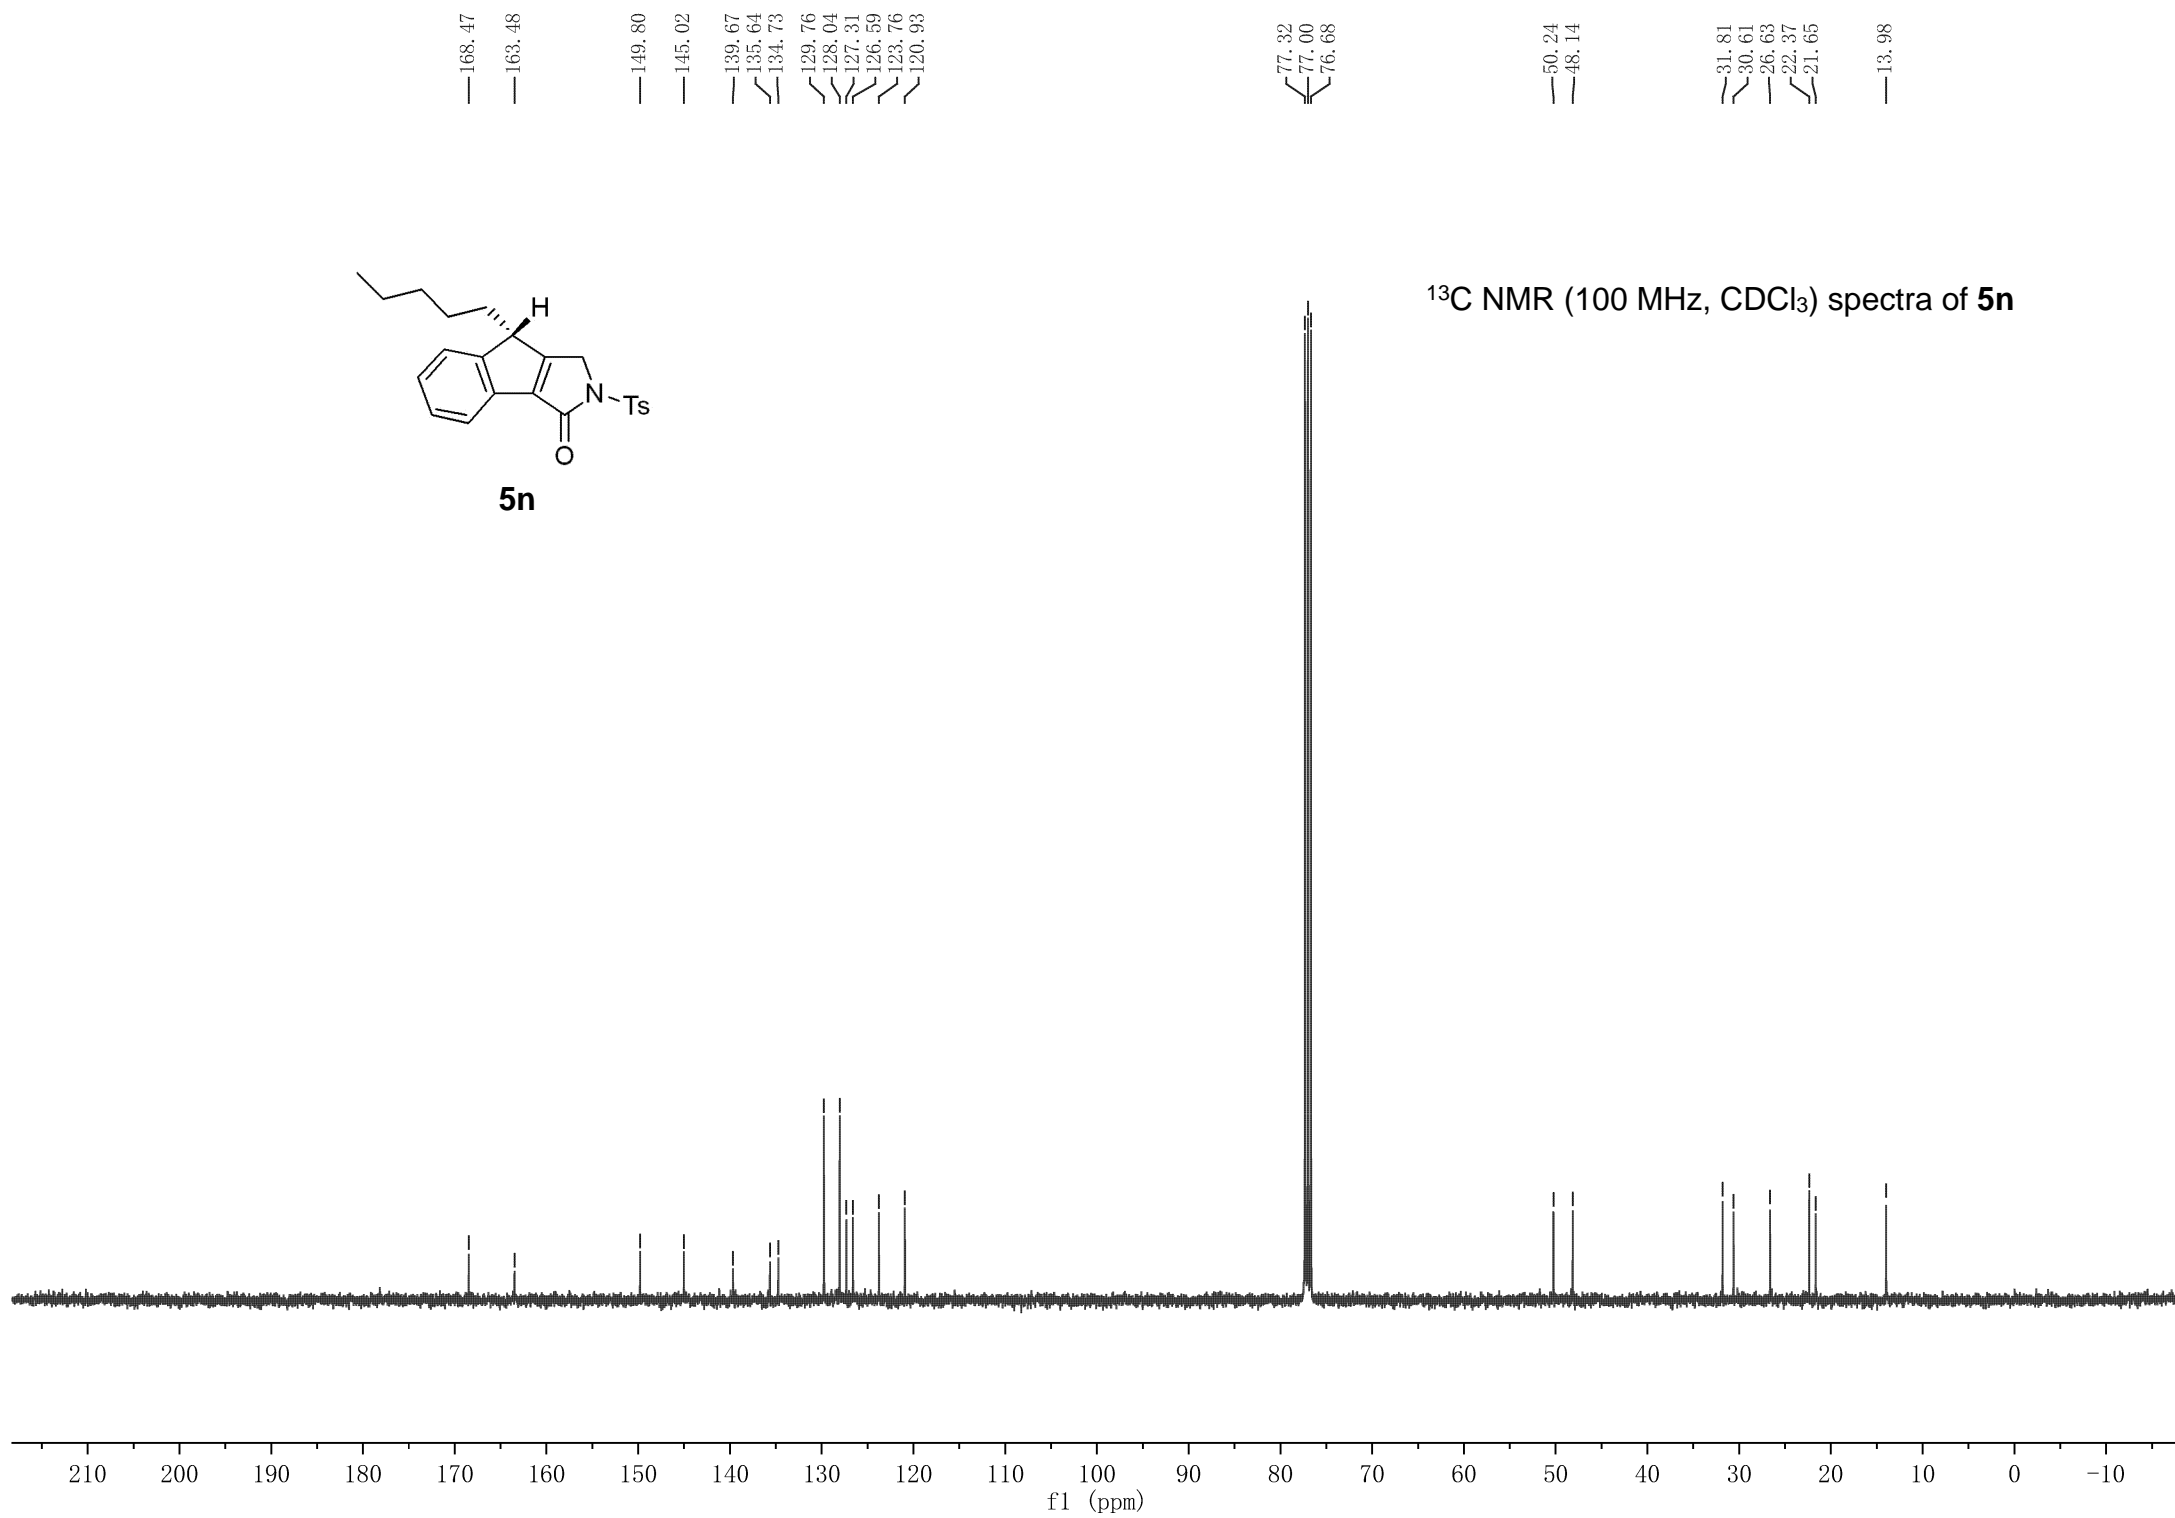

7.930  
7.914  
7.538  
7.520  
7.299  
7.265  
7.246  
7.210  
7.191  
7.180  
7.151  
7.130  
7.053  
7.038

4.599

3.672  
3.633  
3.585

2.568  
2.553  
2.536  
2.340  
1.958  
1.933  
1.910  
1.897  
1.884  
1.734  
1.718  
1.699  
1.684  
1.666  
1.649  
1.612  
1.534  
1.479

0.000

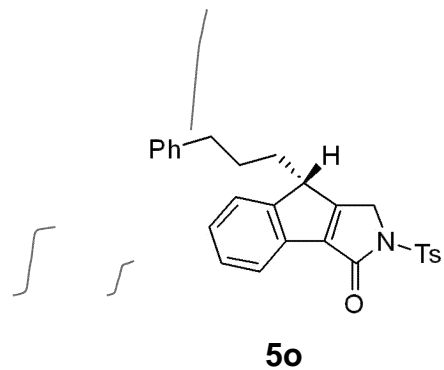

<sup>1</sup>H NMR (400 MHz, CDCl<sub>3</sub>) spectra of **5o**

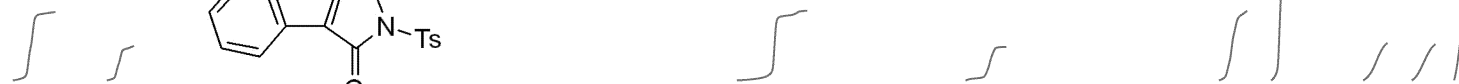

1.92  
0.97  
8.03  
2.03

1.96

0.94

1.95  
3.00

1.05  
1.02  
2.03

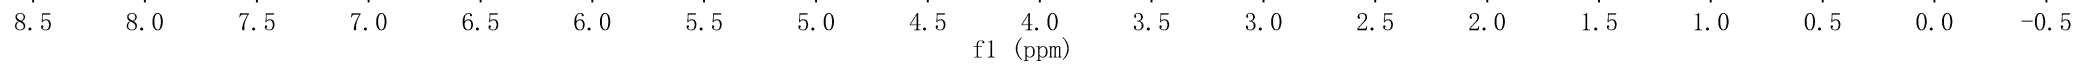

168.11  
163.39  
149.49  
145.01  
141.25  
139.80  
135.59  
134.74  
129.74  
128.48  
128.32  
128.01  
127.37  
126.62  
126.11  
123.77  
120.95

77.32  
77.00  
76.68

50.10  
47.86

35.68

29.85  
28.38

21.64

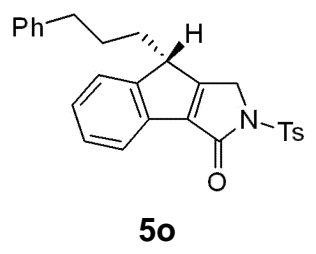

<sup>13</sup>C NMR (100 MHz, CDCl<sub>3</sub>) spectra of **5o**

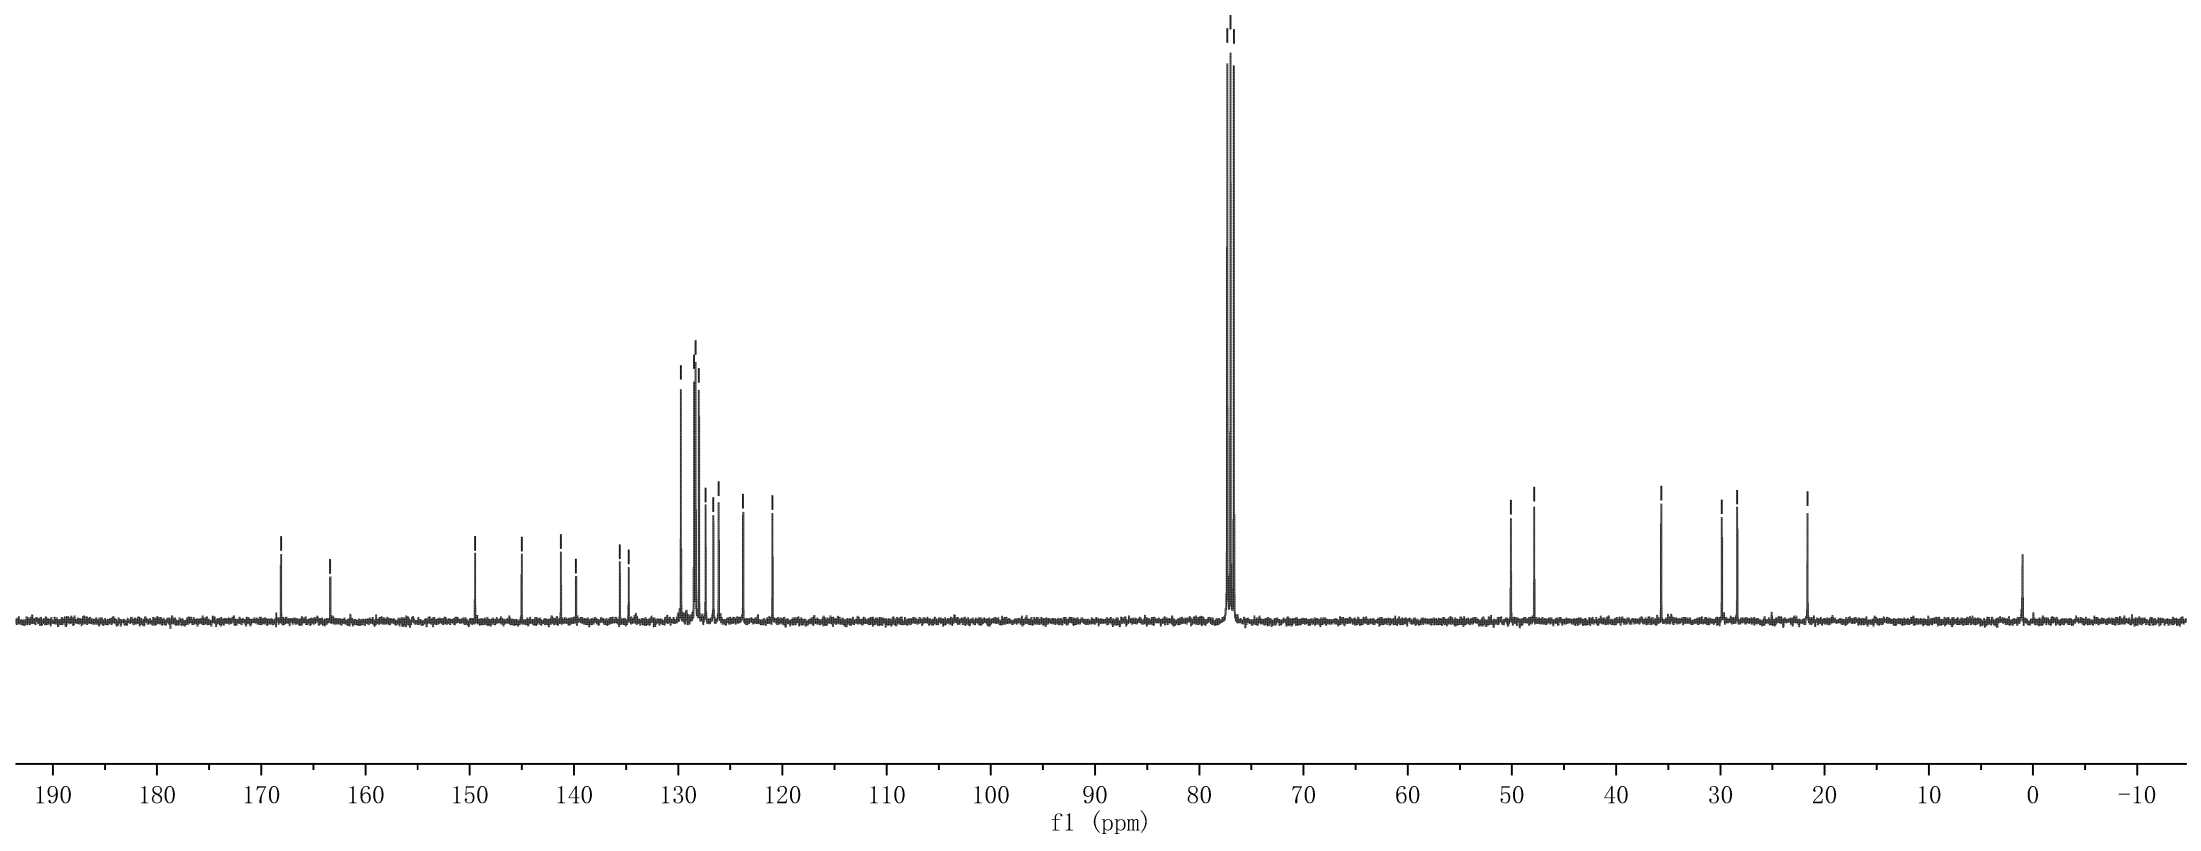

8.087  
8.077  
8.016  
8.002

7.352  
7.337  
7.204  
7.194  
7.140

4.569  
4.521  
4.460  
4.412

3.014  
2.968  
2.888  
2.872  
2.710  
2.668  
2.651  
2.426

1.254  
1.215  
1.205  
1.193

— 0.000

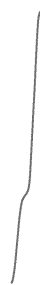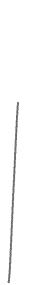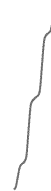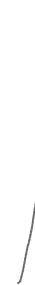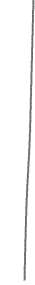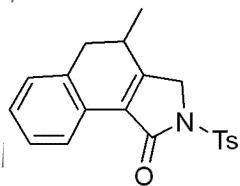

**5pa**

<sup>1</sup>H NMR (400 MHz, CDCl<sub>3</sub>) spectra of **5pa**

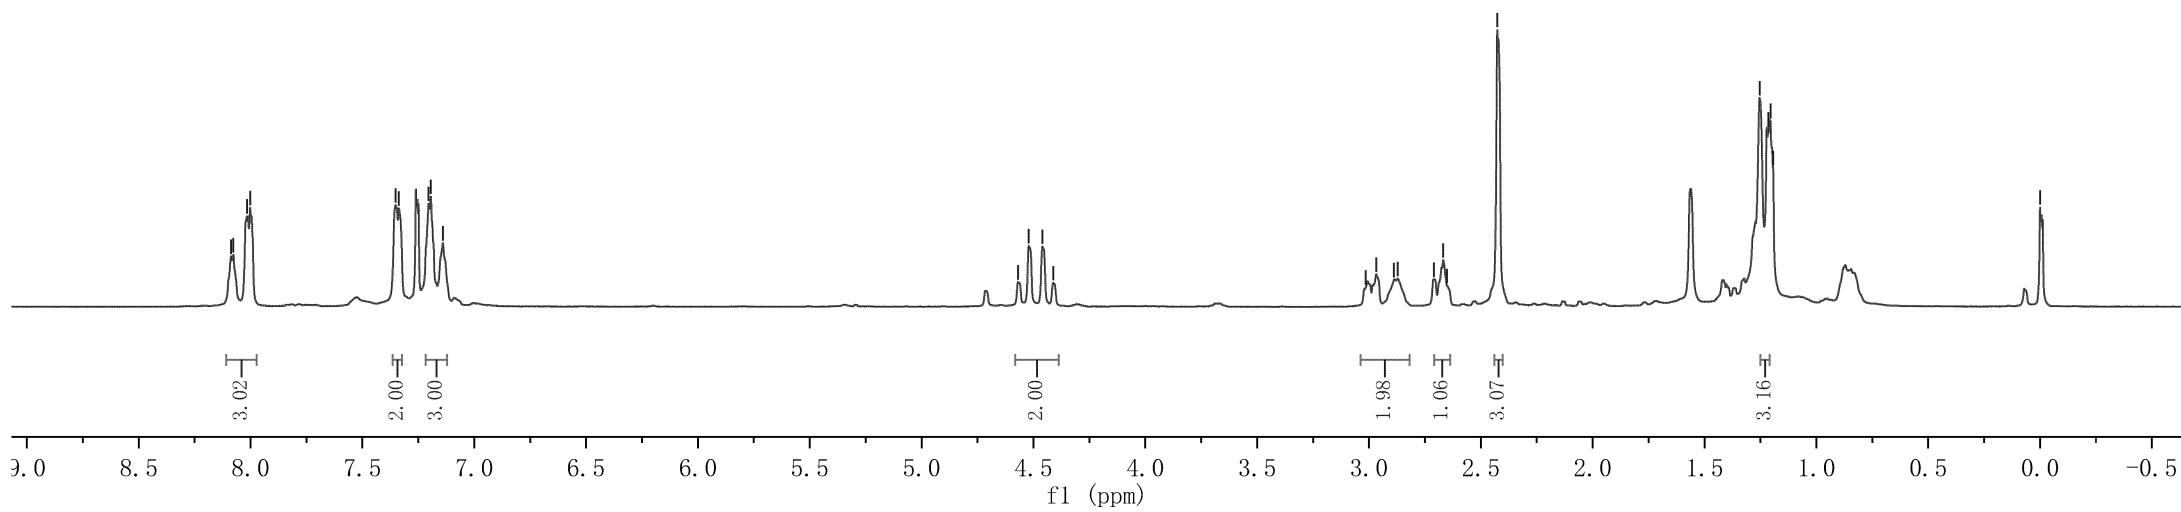

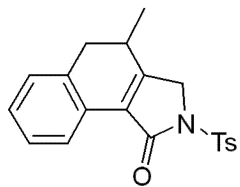

**5pa**

<sup>13</sup>C NMR (100 MHz, CDCl<sub>3</sub>) spectra of **5pa**

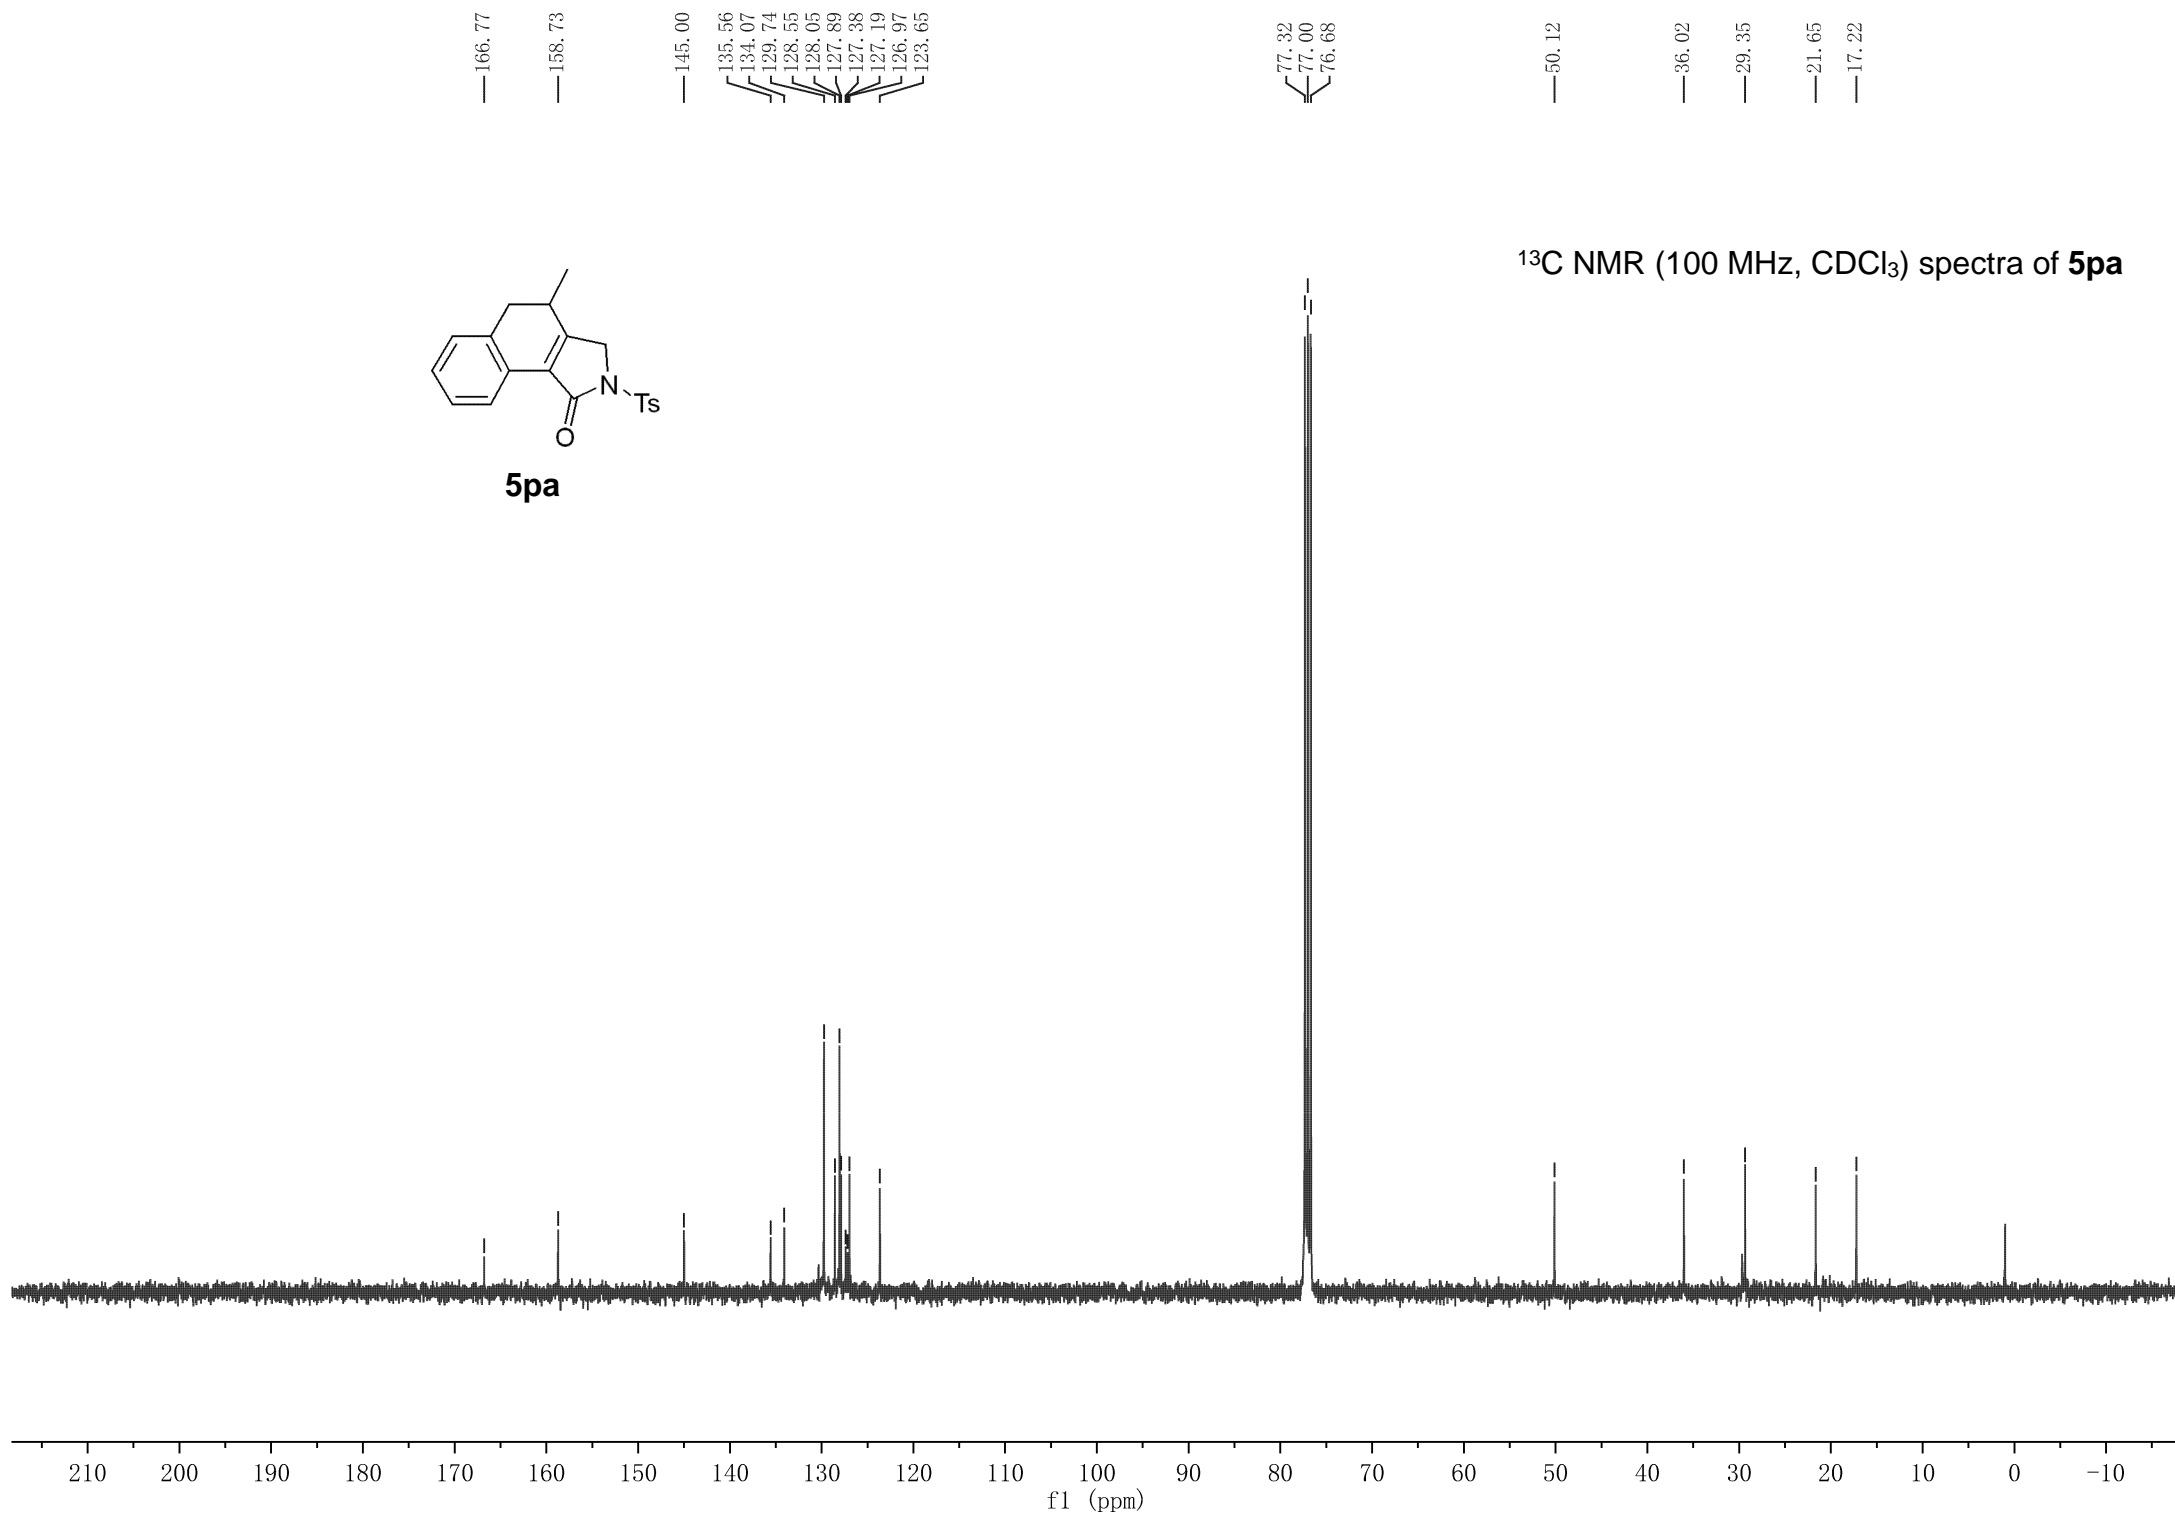



7.957  
7.936

7.327  
7.307  
7.288  
7.190  
7.171  
7.116  
7.098  
7.037  
7.005  
6.987

5.848  
5.817  
5.788  
5.770

4.626

2.798  
2.781  
2.765  
2.619  
2.604  
2.587  
2.569  
2.430

2.071  
2.036  
1.993  
1.913

0.961  
0.880  
0.830

0.000

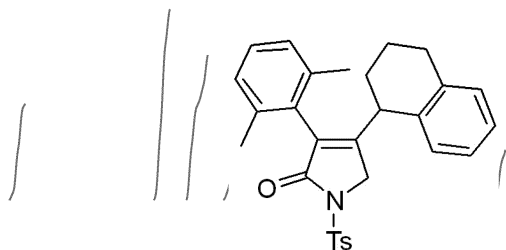

**5qa**

<sup>1</sup>H NMR (400 MHz, CDCl<sub>3</sub>) spectra of **5qa**

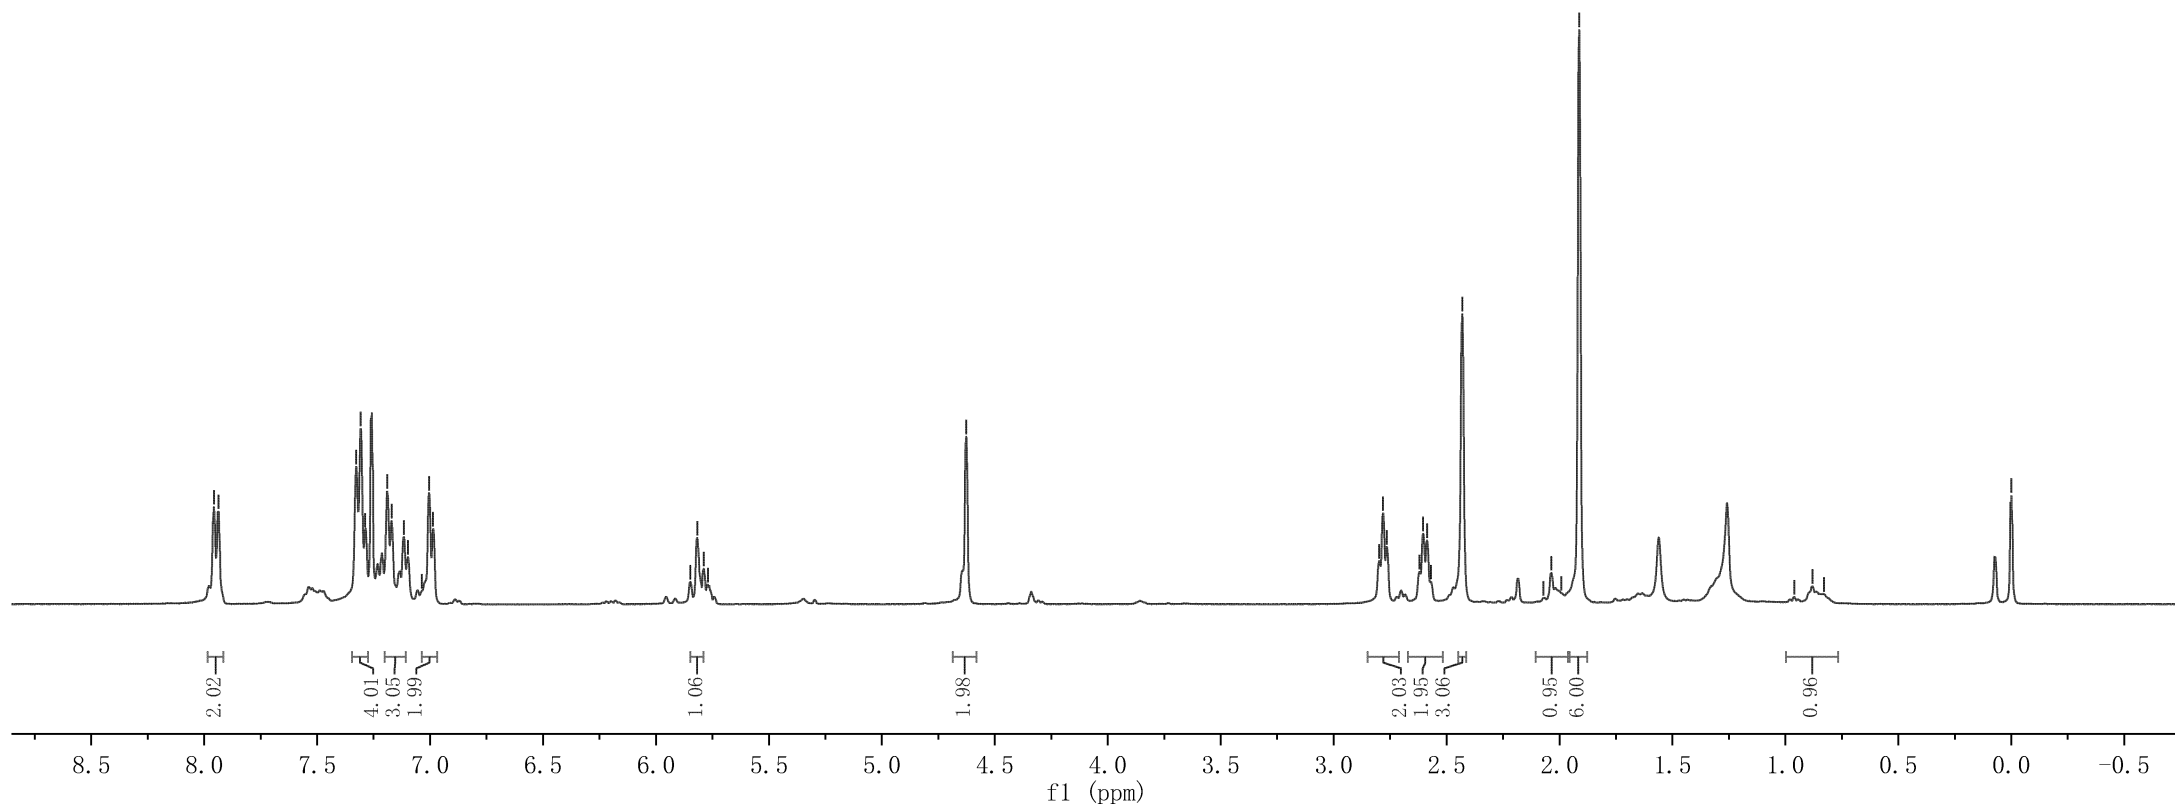

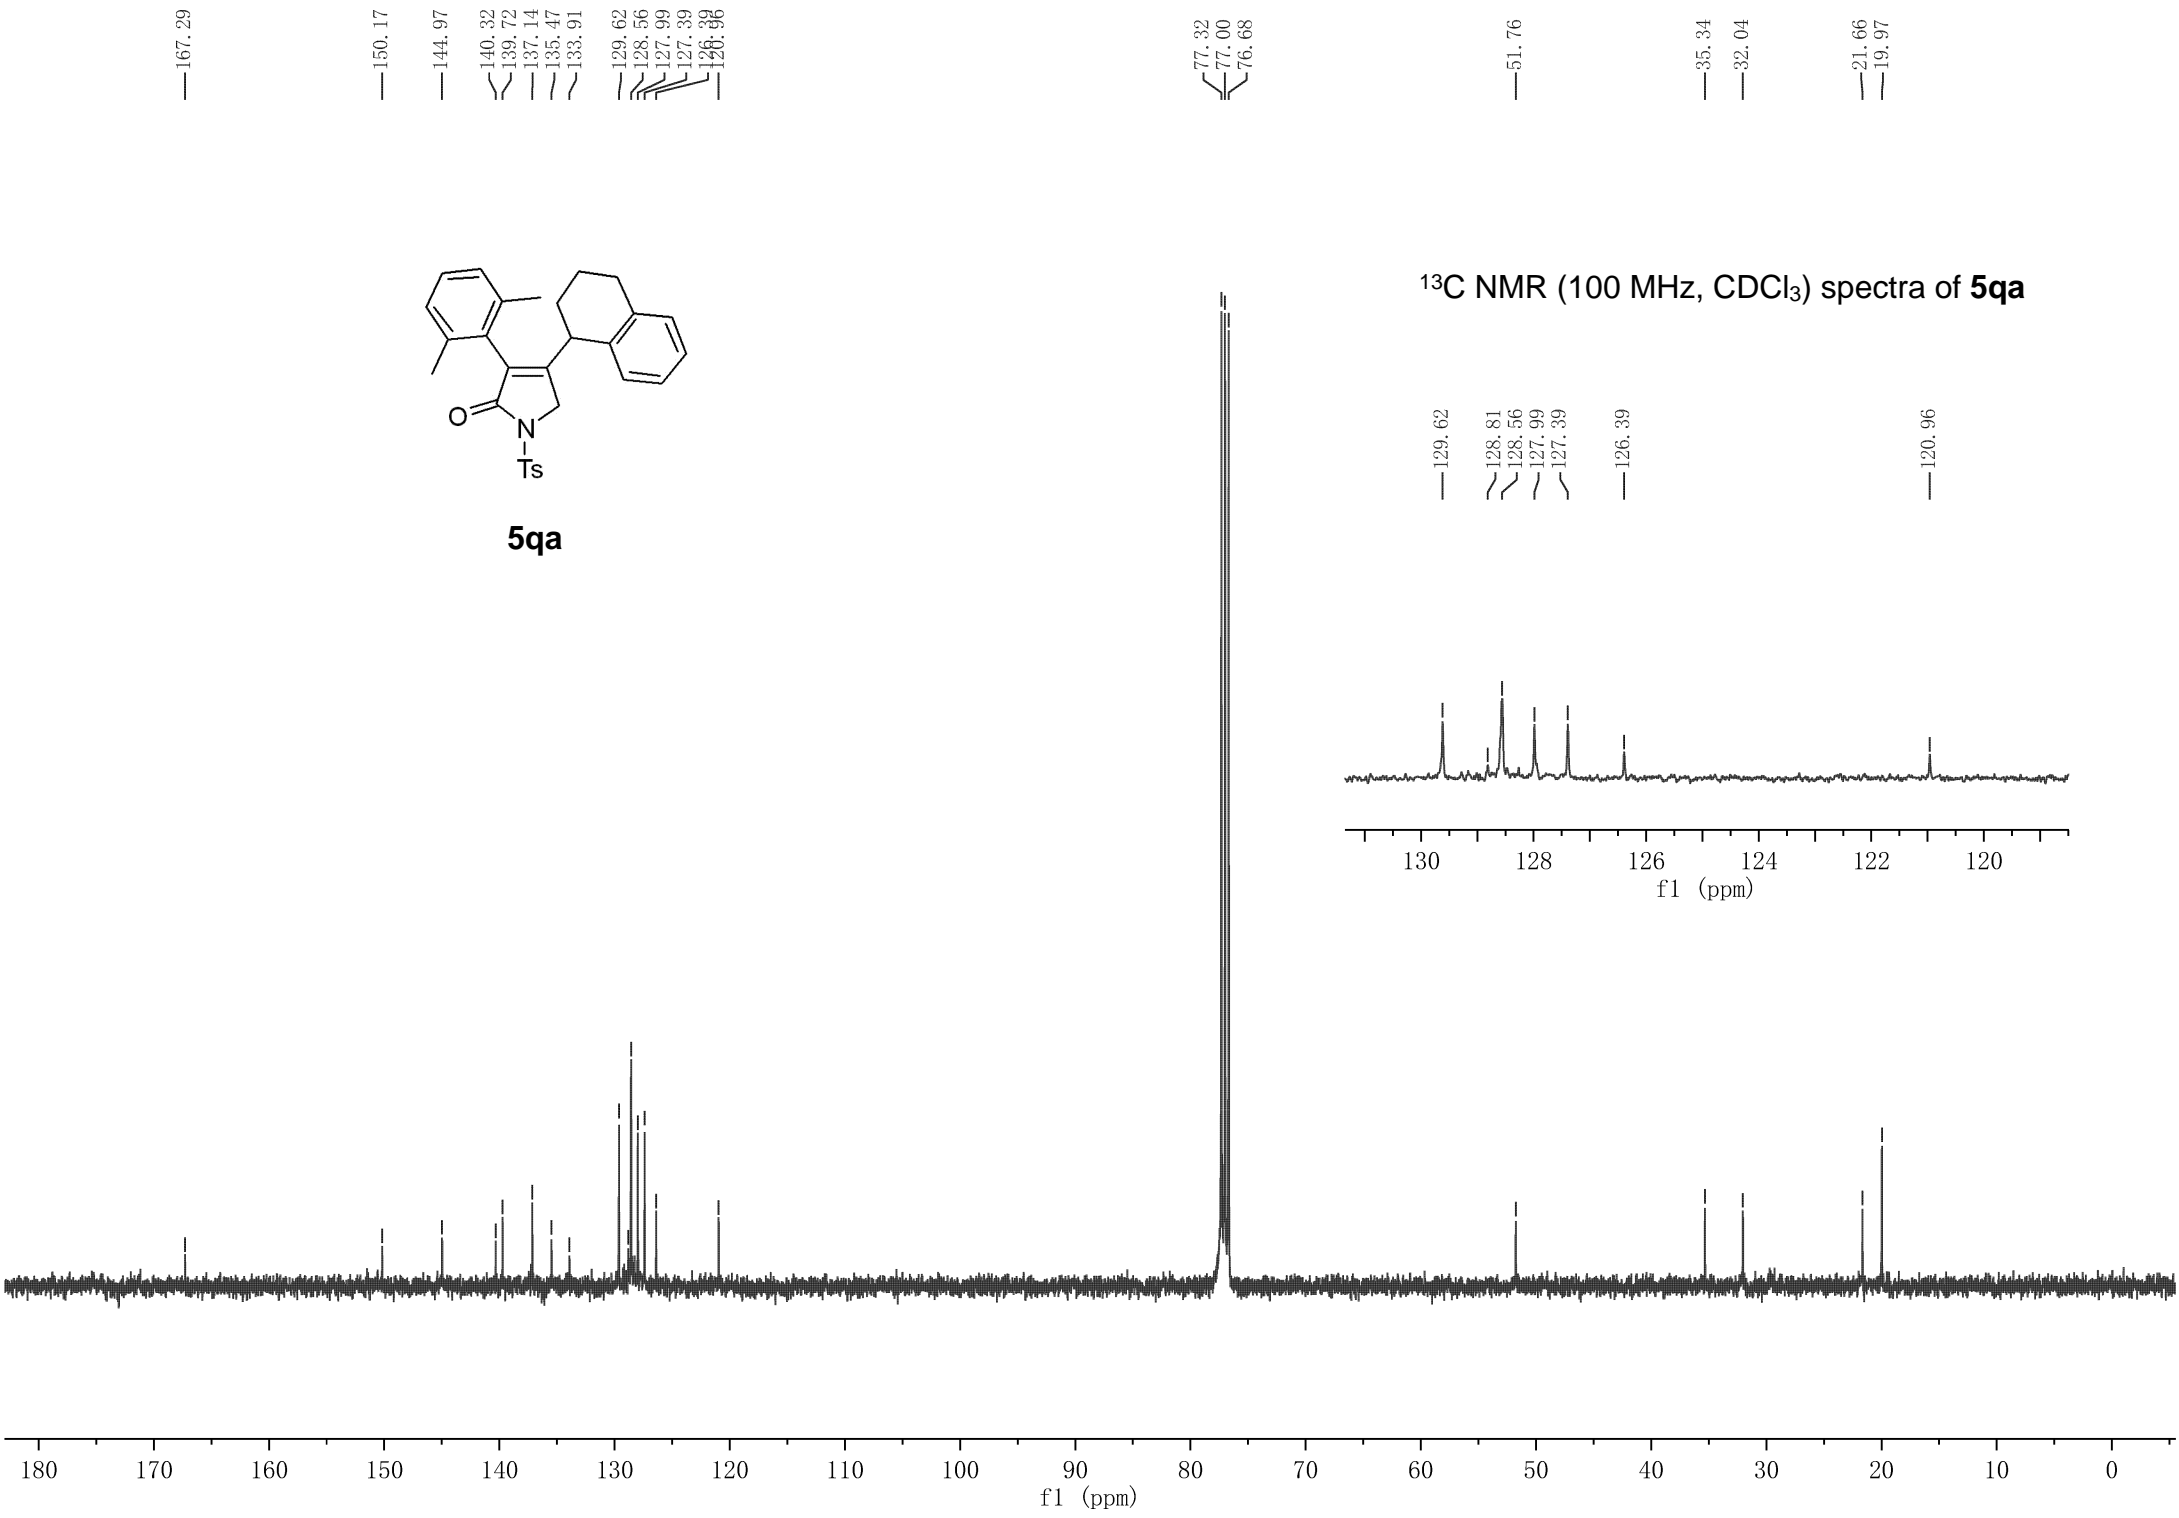

0.000

<sup>1</sup>H NMR (400 MHz, CDCl<sub>3</sub>) spectra of **6**

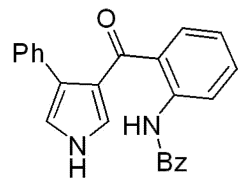

**6**

11.740

8.908  
8.723  
8.707  
7.989  
7.974  
7.812  
7.795  
7.558  
7.543  
7.523  
7.501  
7.486  
7.464  
7.444  
7.430  
7.367  
7.353  
7.315  
7.298  
7.278  
7.264  
7.258  
7.241  
7.226  
7.052  
7.040  
7.017  
6.990  
6.910  
6.905  
6.872

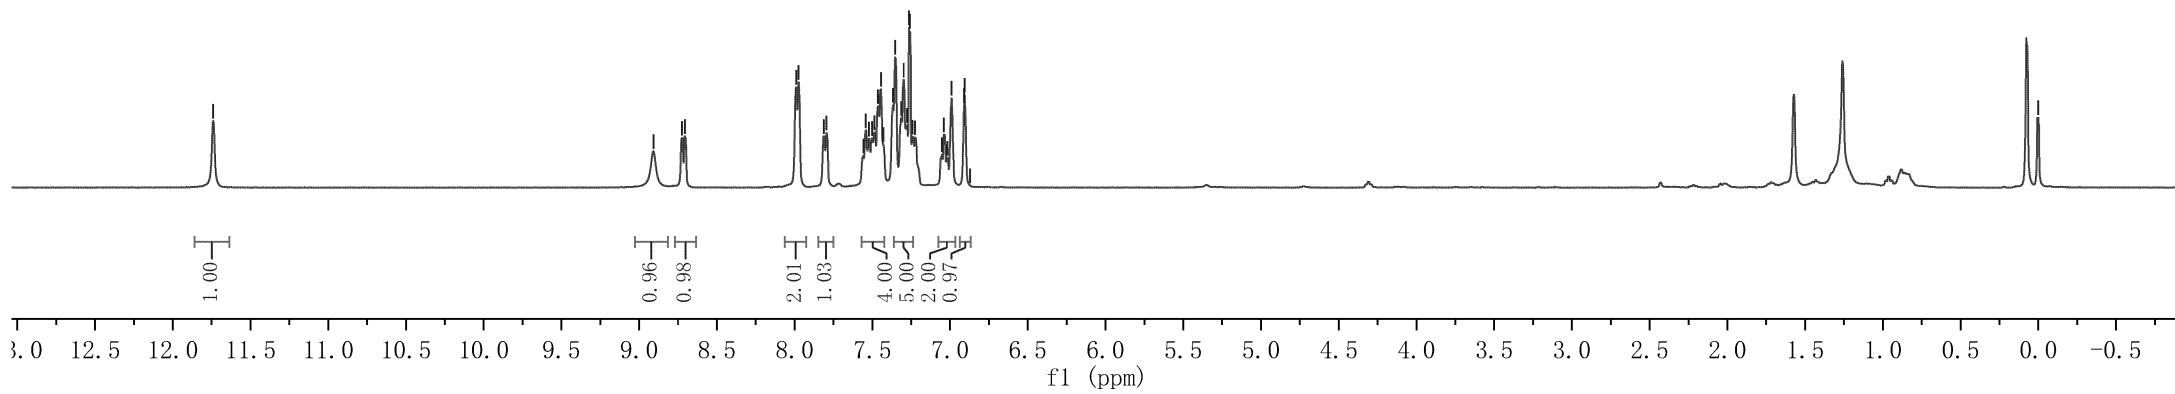

— 194.48

— 166.21

— 139.71  
— 134.43  
— 134.30  
— 133.36  
— 133.15  
— 131.95  
— 128.73  
— 128.32  
— 128.25  
— 127.45  
— 127.12  
— 126.94  
— 126.45  
— 126.29  
— 122.69  
— 122.43  
— 121.45  
— 118.79

— 77.32  
— 77.00  
— 76.68

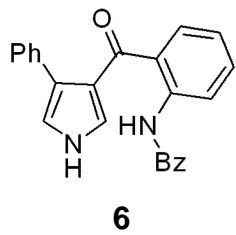

<sup>13</sup>C NMR (100 MHz, CDCl<sub>3</sub>) spectra of **6**

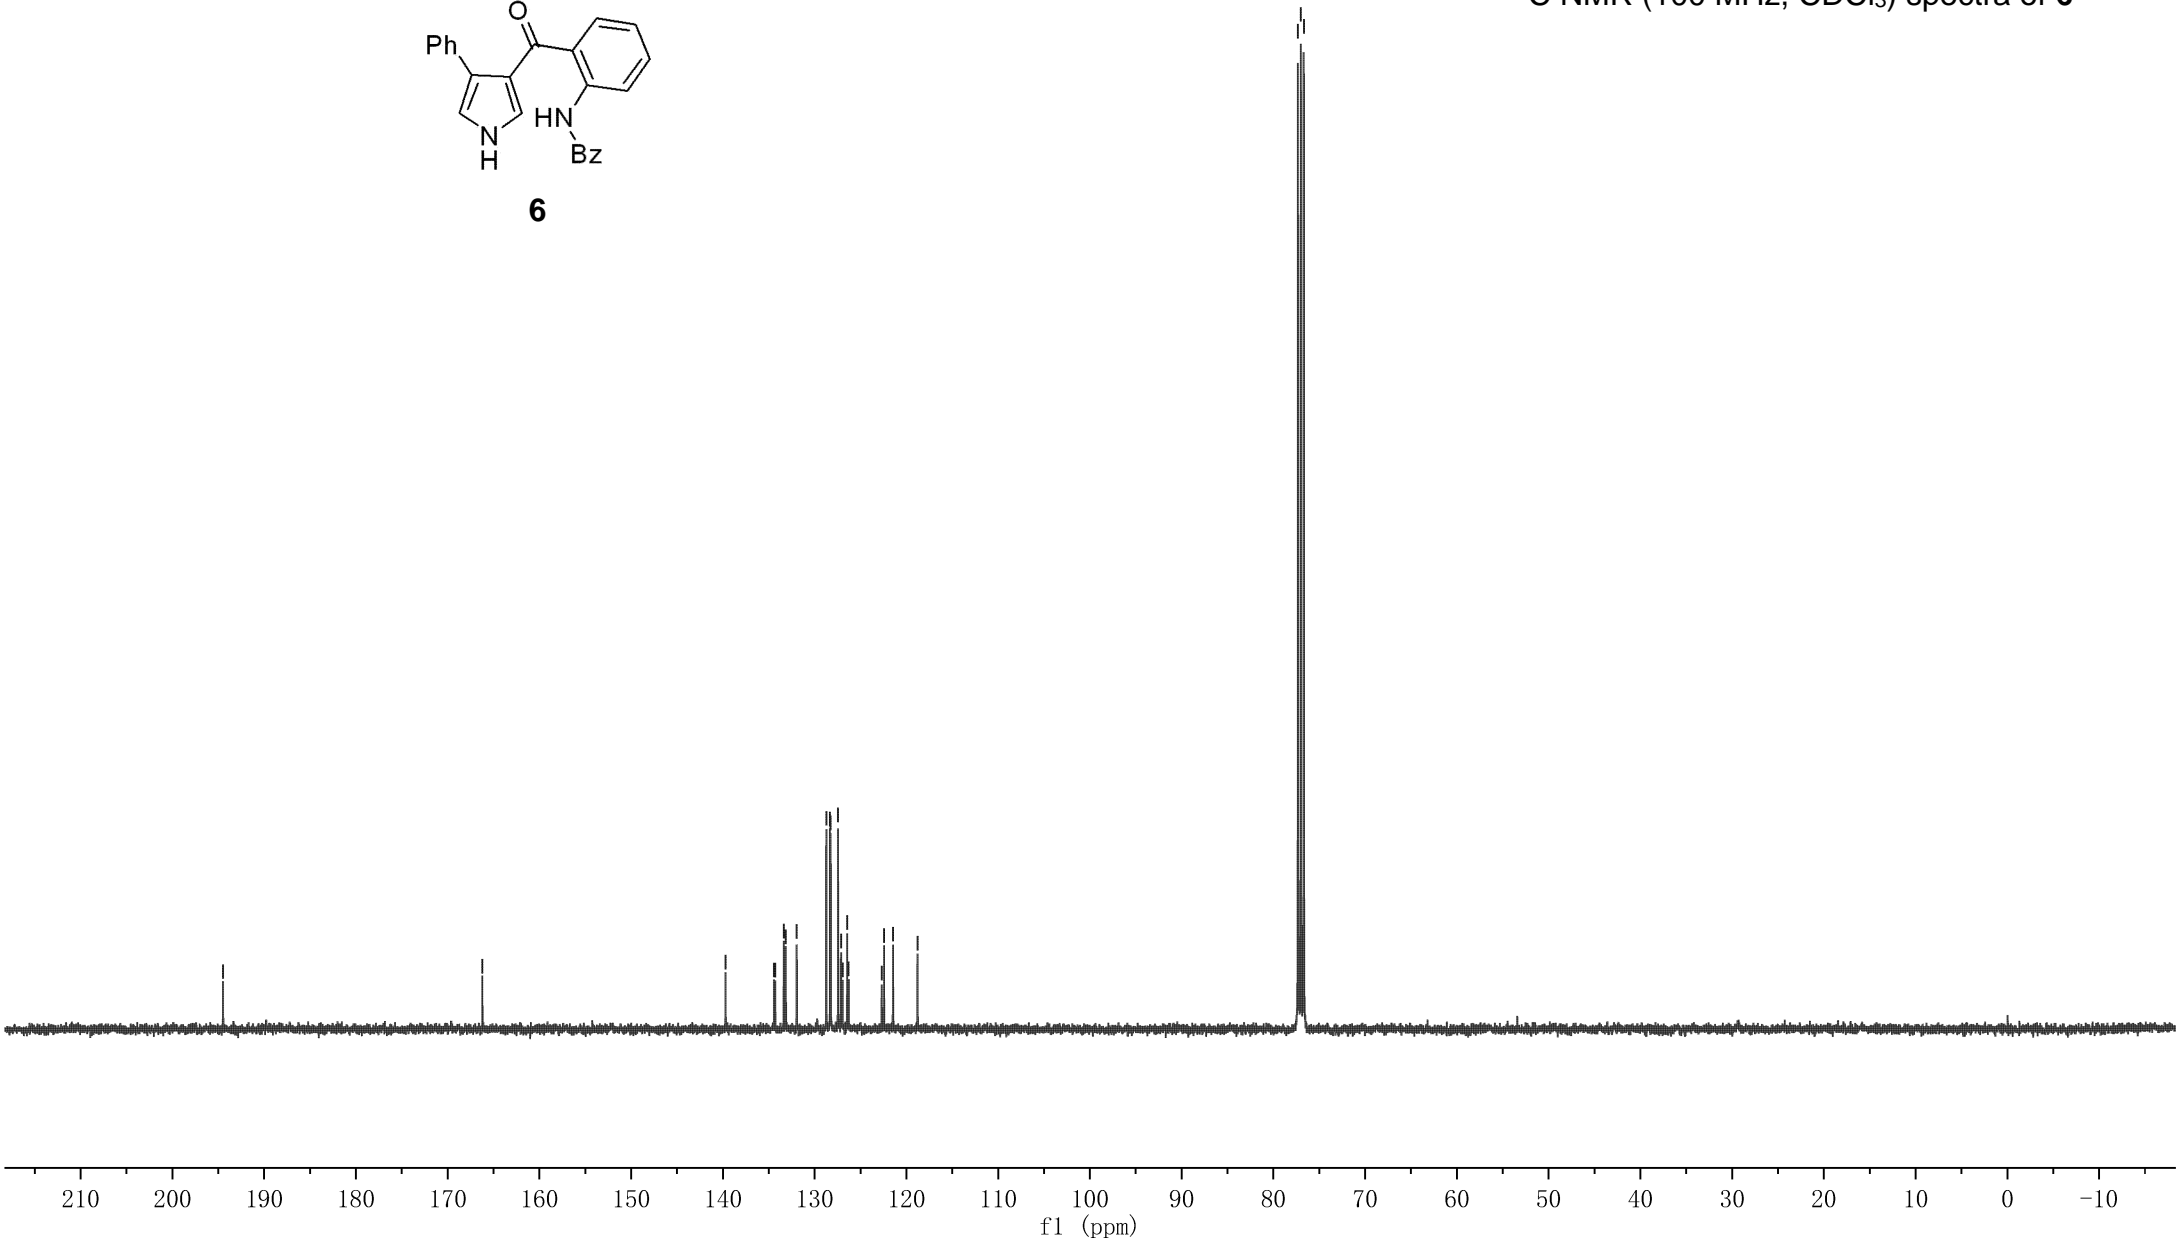

7.753  
7.732  
7.300  
7.284  
7.262  
7.240  
7.220  
7.182  
7.163  
7.114  
6.863  
6.590

5.839

4.250

2.369

0.000

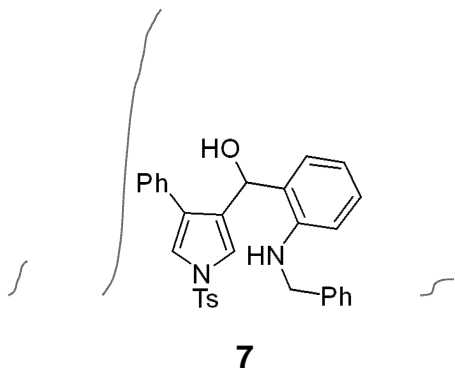

<sup>1</sup>H NMR (400 MHz, CDCl<sub>3</sub>) spectra of **7**

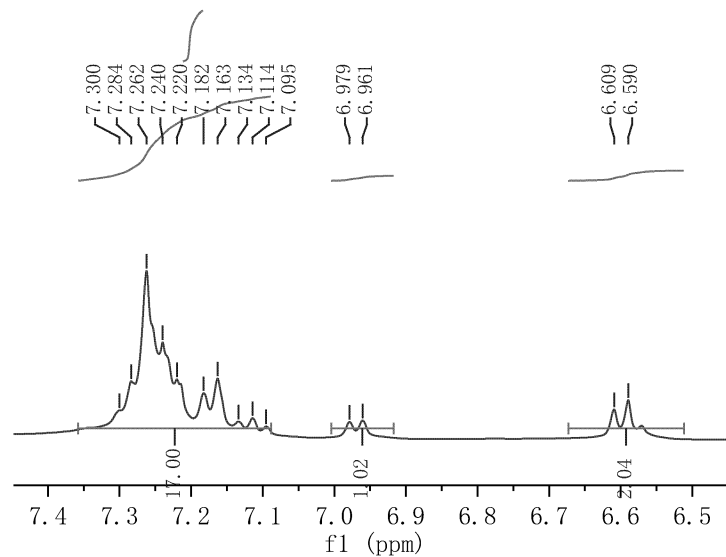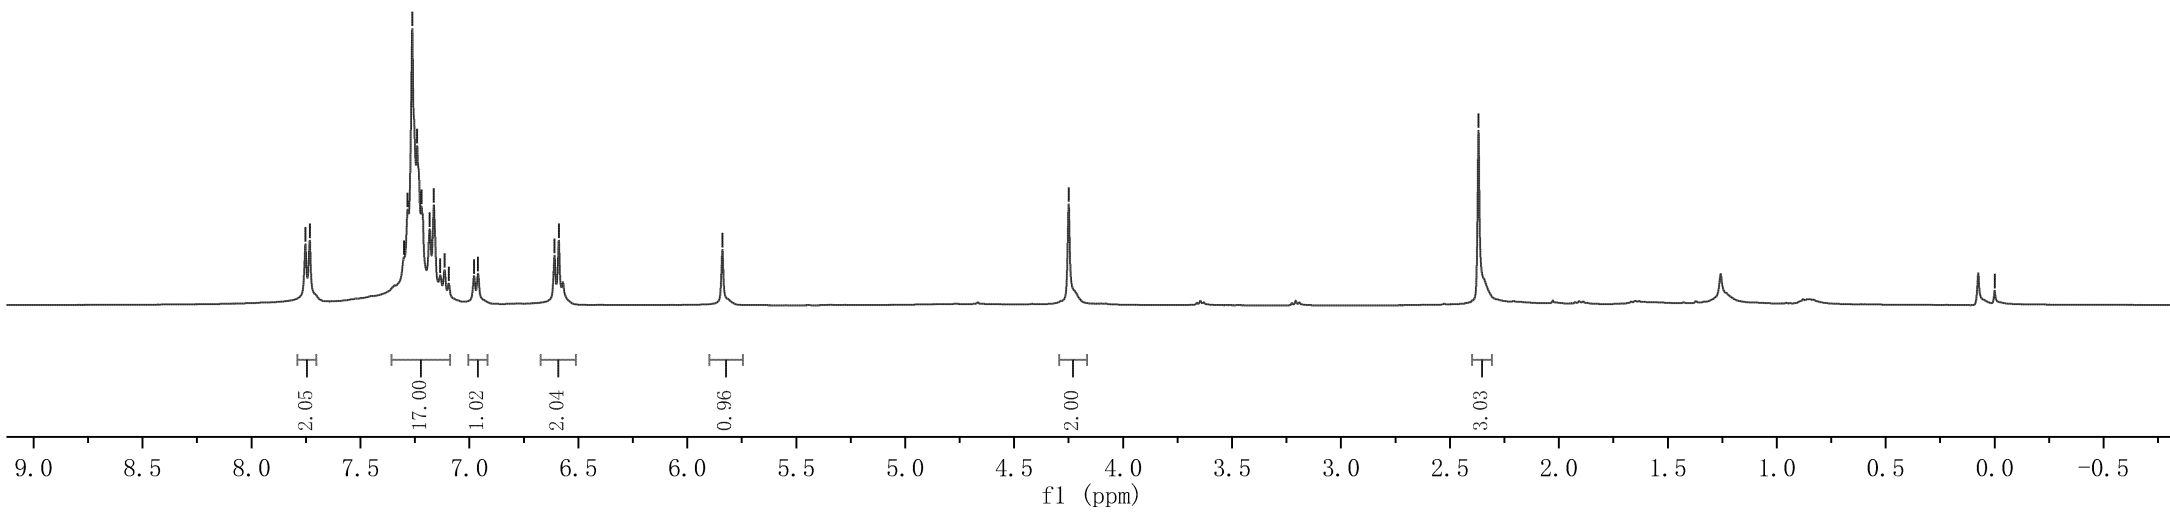

145.85  
145.17  
139.25  
130.03  
129.22  
129.08  
128.54  
128.26  
127.55  
127.26  
127.04  
126.99  
126.98  
118.62  
116.78  
111.58

77.32  
77.00  
76.68

68.16

47.68

21.59

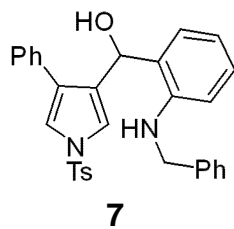

<sup>13</sup>C NMR (100 MHz, CDCl<sub>3</sub>) spectra of **7**

139.25  
135.76  
133.22  
130.03  
129.22  
129.08  
128.54  
128.26  
127.55  
127.26  
127.04  
126.99  
125.98  
119.98  
118.62  
116.78  
111.58

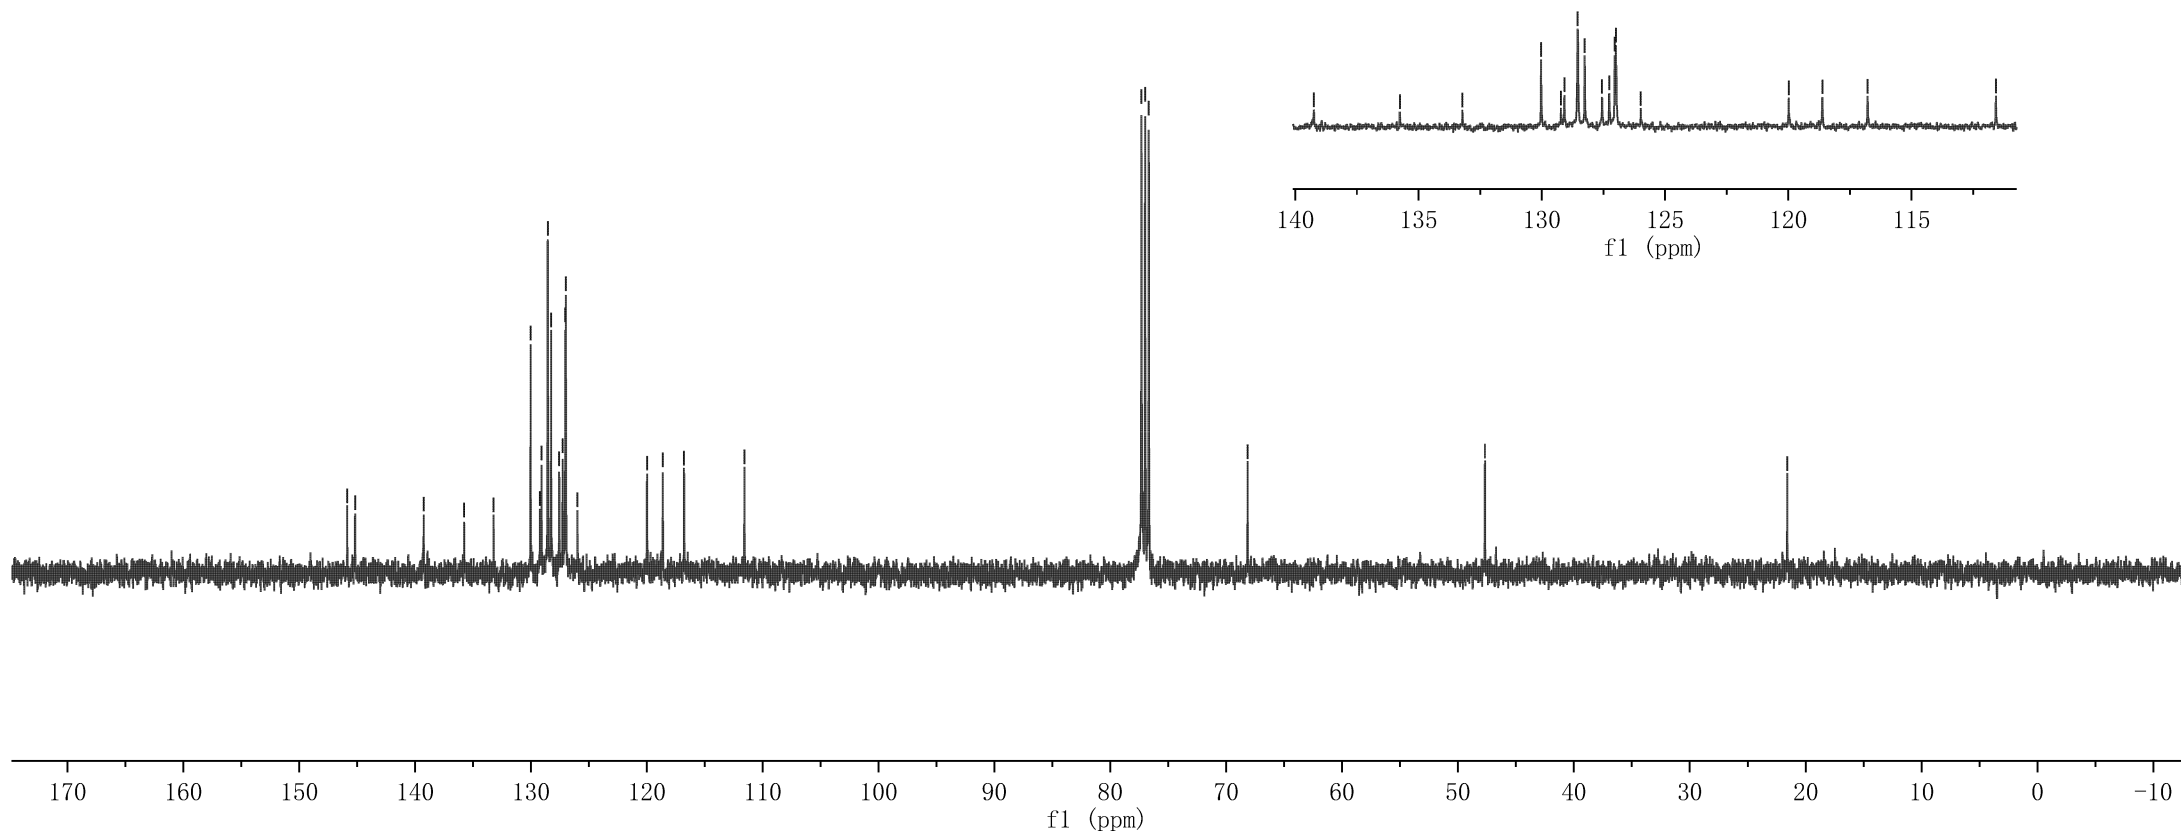

7.734  
7.714  
7.352  
7.332  
7.312  
7.258  
7.239  
7.219  
7.191  
7.173

5.323  
5.284  
5.272

4.626  
4.594  
4.568  
4.536

4.104  
4.092  
4.069  
4.058  
3.805  
3.787  
3.771  
3.753

3.341  
3.329  
3.316

2.385  
2.012  
1.993  
1.982  
1.965  
1.947  
1.742  
1.726  
1.708  
1.674

0.517  
0.498  
0.480

0.000

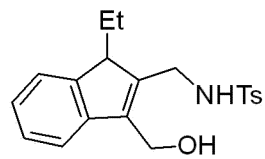

**8**

<sup>1</sup>H NMR (400 MHz, CDCl<sub>3</sub>) spectra of **8**

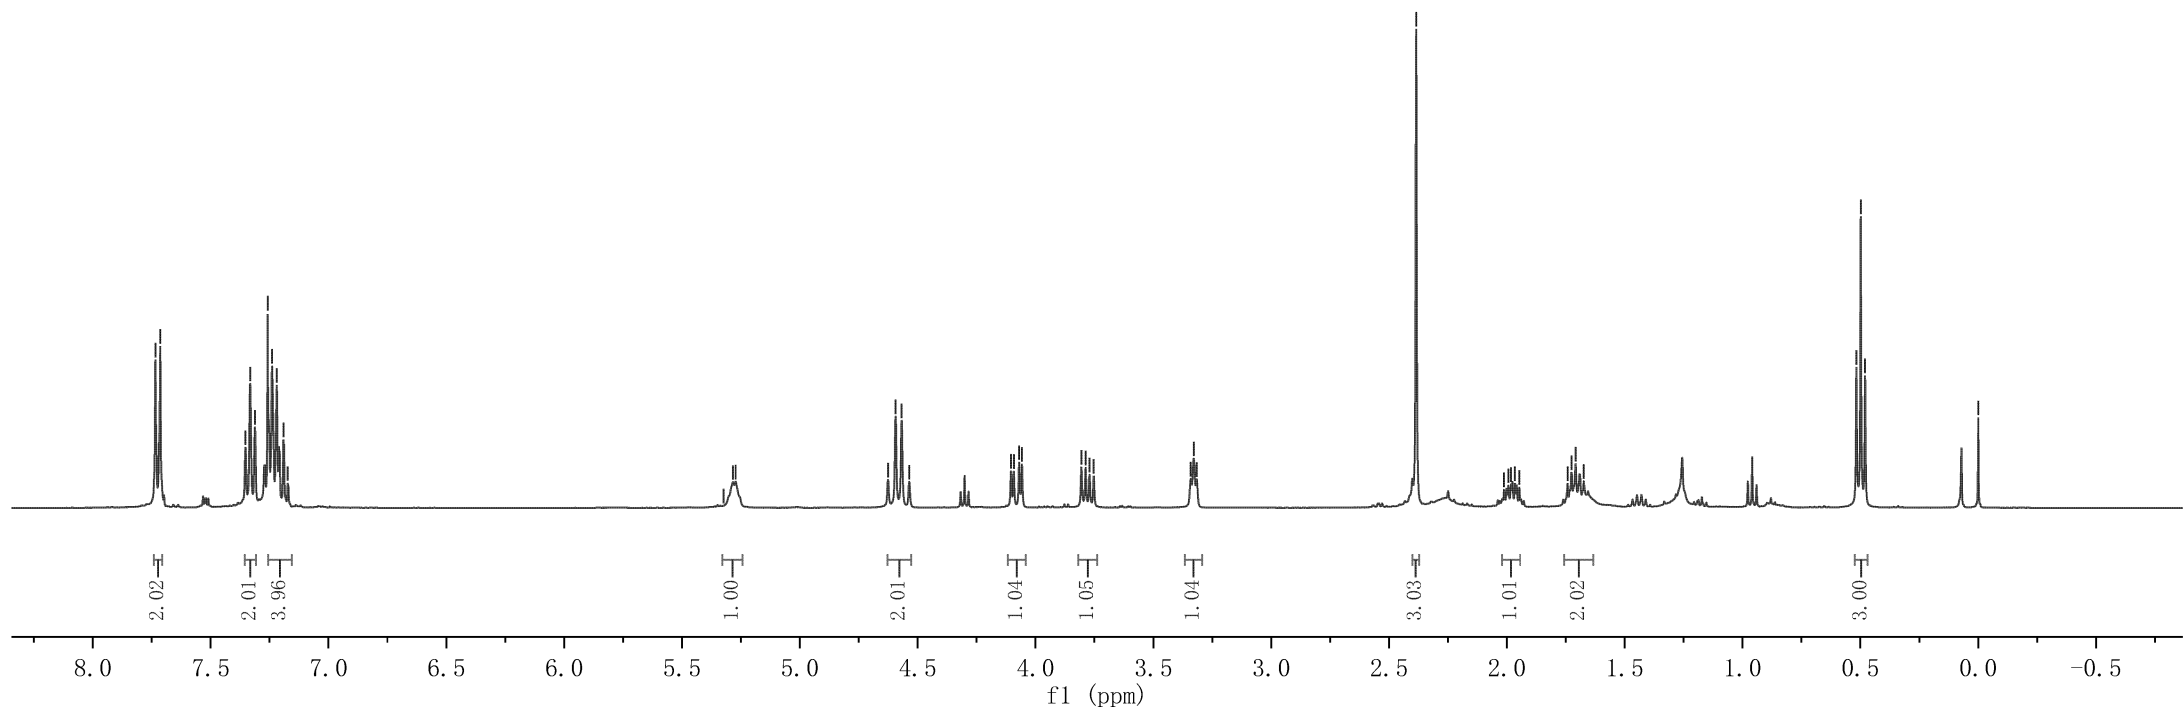

146.33  
143.51  
143.33  
142.00  
139.99  
136.70

129.67  
127.09  
126.52  
125.36  
123.00  
119.40

77.32  
77.00  
76.68

56.31

50.54

38.97

22.18  
21.47

8.74

<sup>13</sup>C NMR (100 MHz, CDCl<sub>3</sub>) spectra of 8

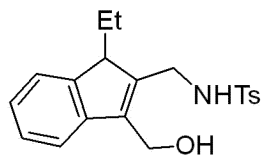

**8**

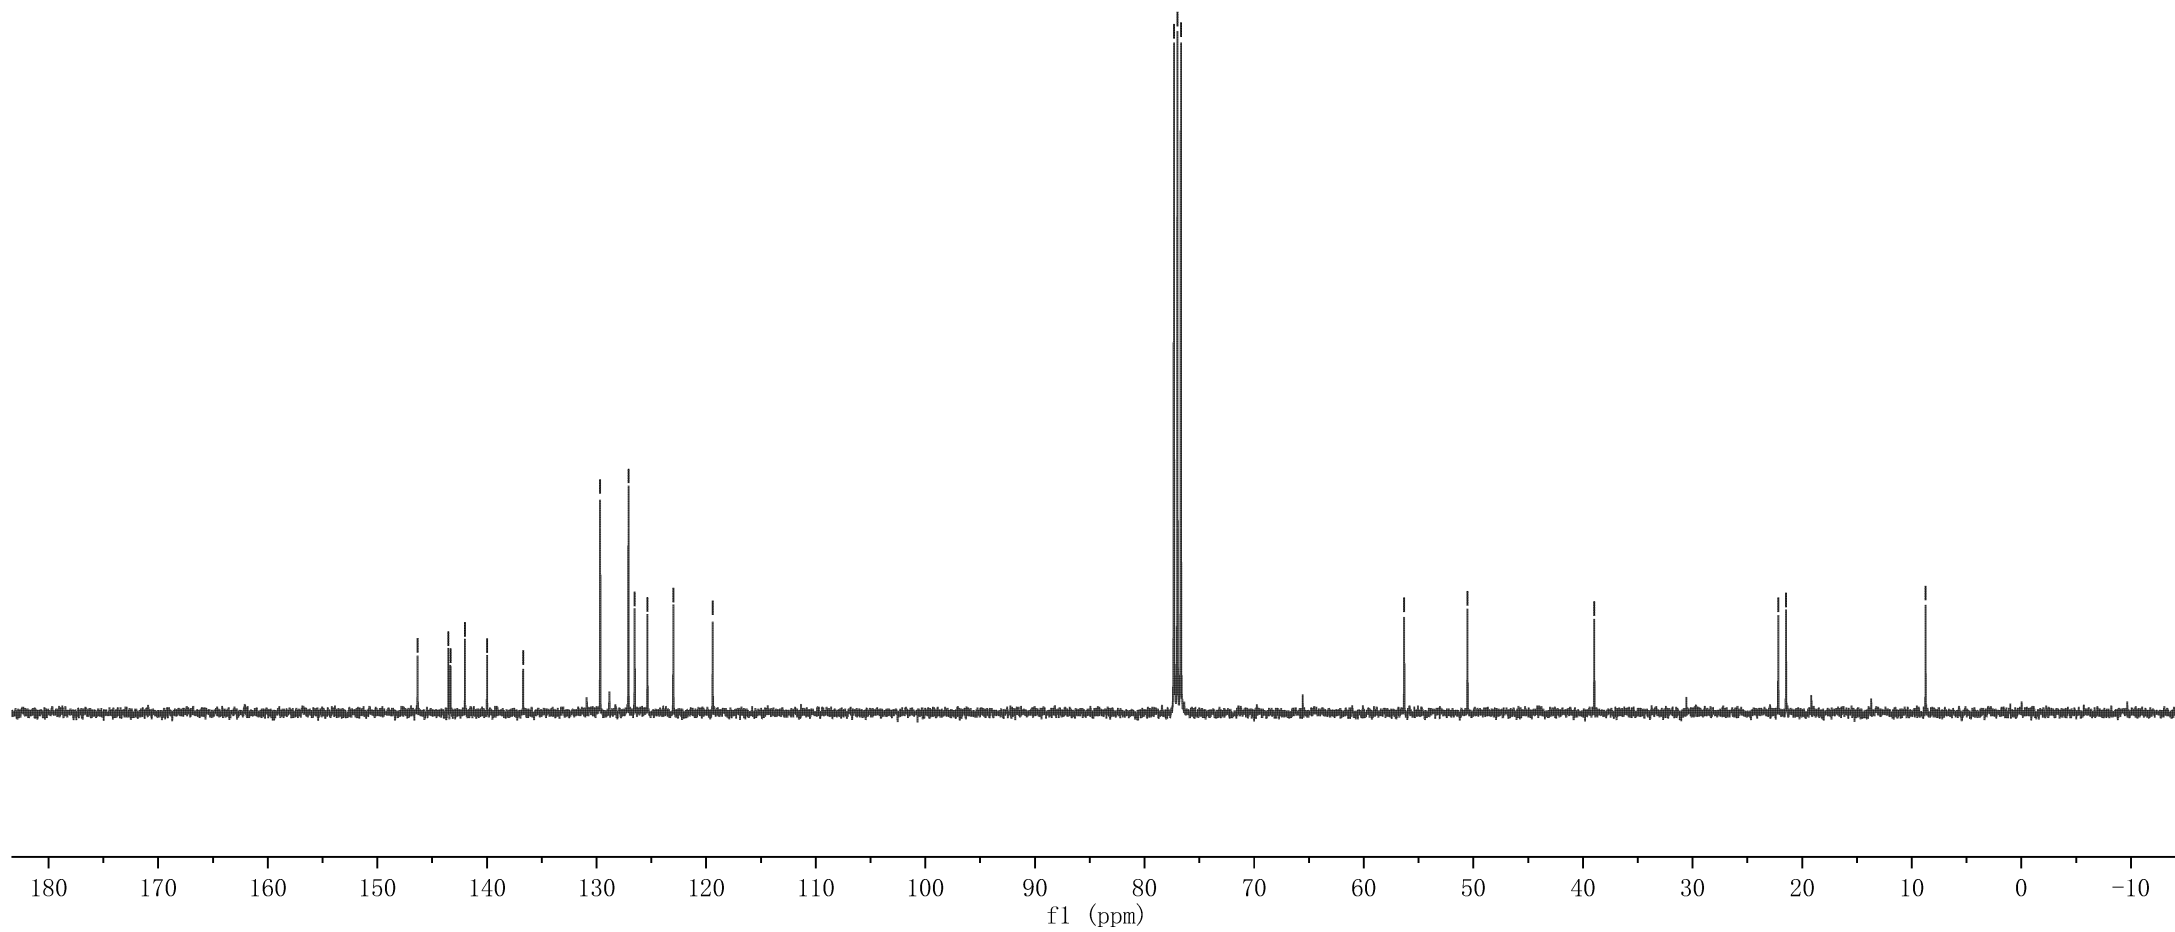



7.764  
7.744  
7.503  
7.485  
7.336  
7.317  
7.299  
7.277  
7.258  
7.222  
7.204  
7.186

5.121  
5.106  
5.092

4.224  
4.079  
4.060  
4.044  
4.026  
3.958  
3.947  
3.924  
3.912  
3.890  
3.703

2.548  
2.529  
2.510  
2.491  
2.396

1.159  
1.140  
1.121

— 0.000

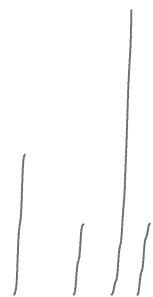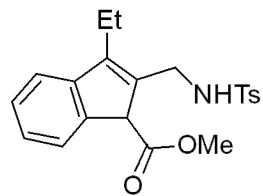

**9**

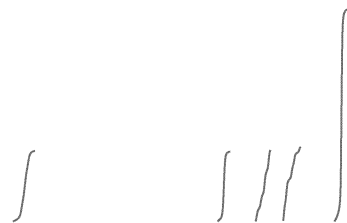

<sup>1</sup>H NMR (400 MHz, CDCl<sub>3</sub>) spectra of **9**

2.00  
1.01  
4.06  
1.02

1.00

0.99  
1.01  
1.06  
3.01

2.04  
3.00

3.03

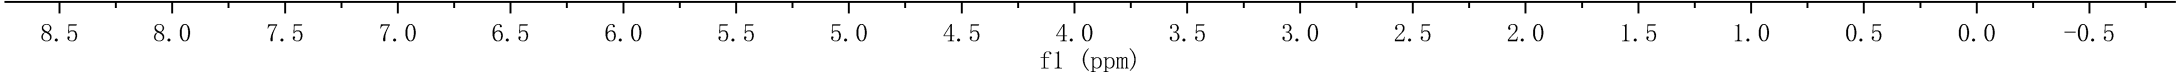

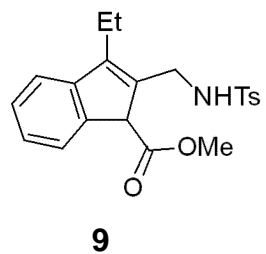

<sup>13</sup>C NMR (100 MHz, CDCl<sub>3</sub>) spectra of **9**

171.36  
146.64  
144.17  
143.40  
140.11  
136.76  
132.48  
129.60  
127.69  
127.15  
125.83  
123.87  
119.66

77.32  
77.00  
76.68

55.44  
52.55

39.94

21.48  
18.59  
13.42

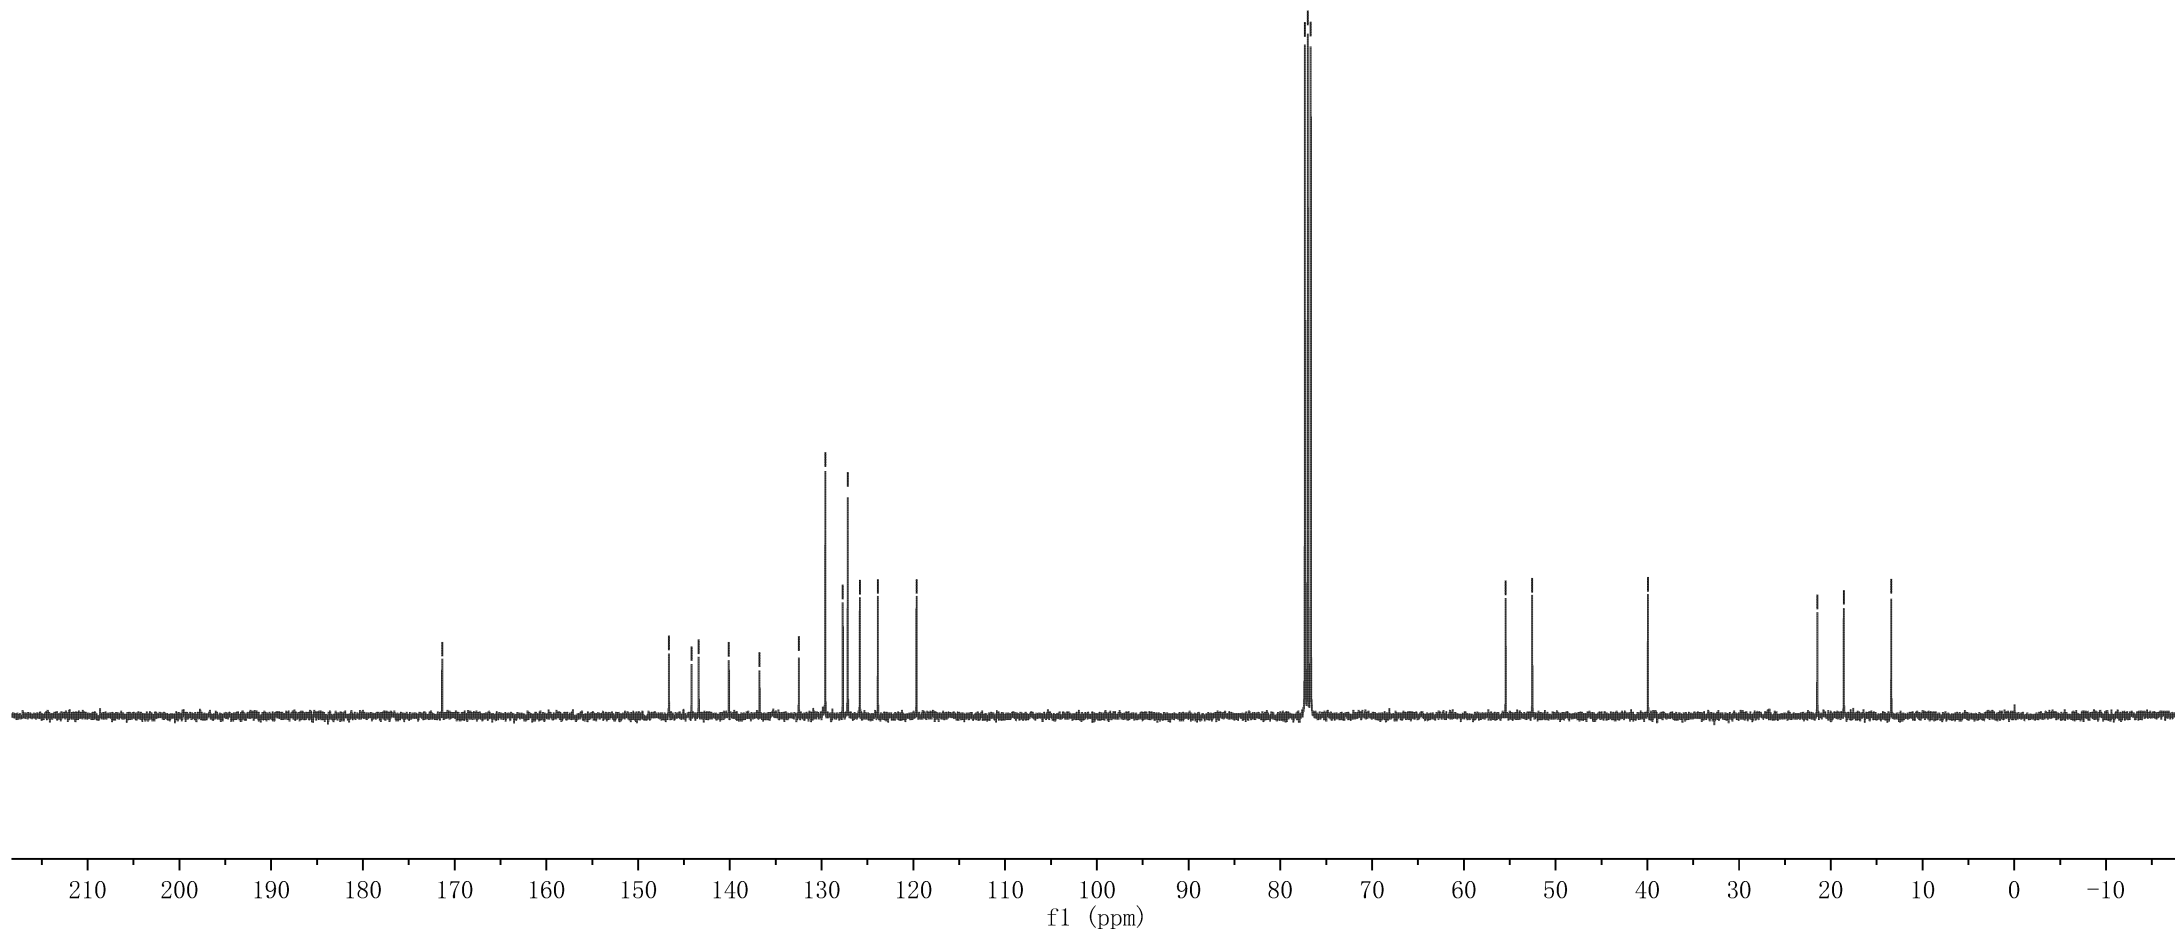

Supplement: d1qo00912e1.pdf [file d1qo00912e1.pdf]
